# Supplementary material for: Prosaposin activates the androgen receptor and potentiates resistance to endocrine treatment in breast cancer
Source: PubMed Central journal article supplement (PMC4560928; doi:10.1186/s13058-015-0636-6), 2015-09-04
Supplement: 13058_2015_636_MOESM4_ESM.pdf [file 13058_2015_636_MOESM4_ESM.pdf]

# Supplemental Figure 2

A (i)

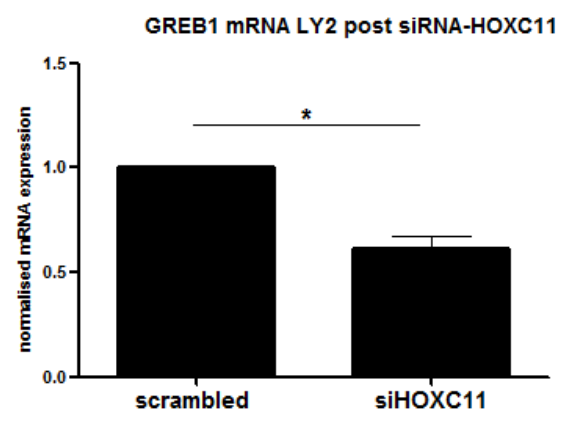

(ii)

| Gene ID         | Gene  | Locus               | fpkm_ scram | fpkm_ siHOXC11 |
|-----------------|-------|---------------------|-------------|----------------|
| ENSG00000196208 | GREB1 | 2:11674241-11782914 | 46.778      | 31.369         |

B

Summary ?

**Name** [MA0007.2](#)  
**Alt. Name** AR  
**Database** JASPAR\_CORE\_2014.meme  
**p-value** 2.25589e-06  
**E-value** 0.00133774  
**q-value** 0.00267306

Alignment ?

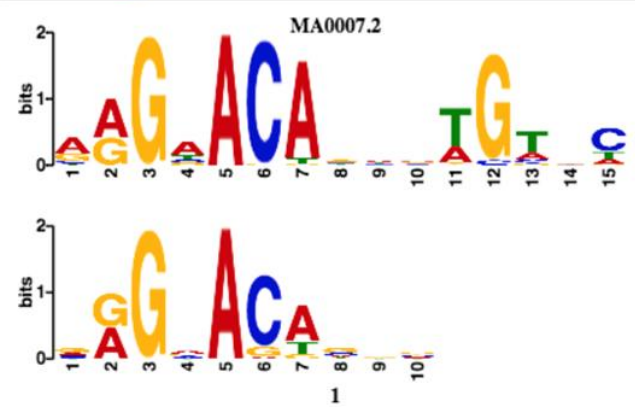

**Overlap** 10  
**Offset** 0  
**Orientation** Normal
