# Supplementary material for: Prosaposin activates the androgen receptor and potentiates resistance to endocrine treatment in breast cancer
Source: Springer Nature journal article supplement (doi:10.1186/s13058-015-0636-6), 2015-09-04

# Supplemental Figure 1

## A TransAM assay AR binding to HRE in LNCaP vs. LetR

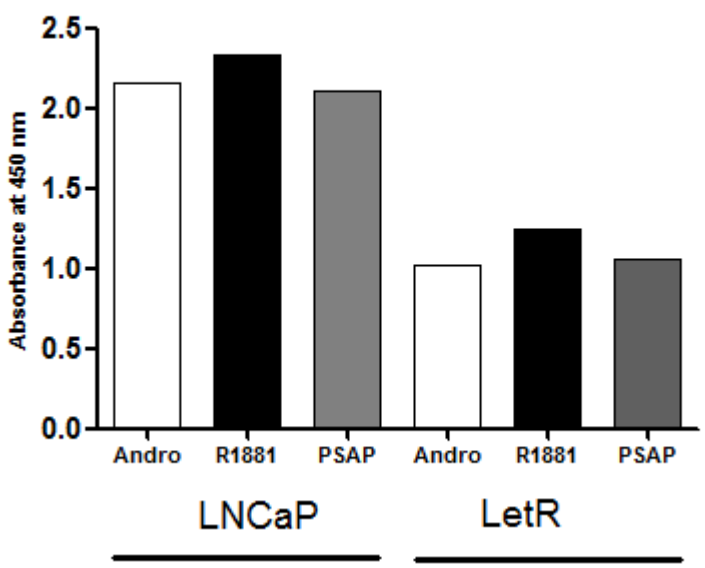

## B TransAM assay signal/noise for varying concentrations of AR antibody

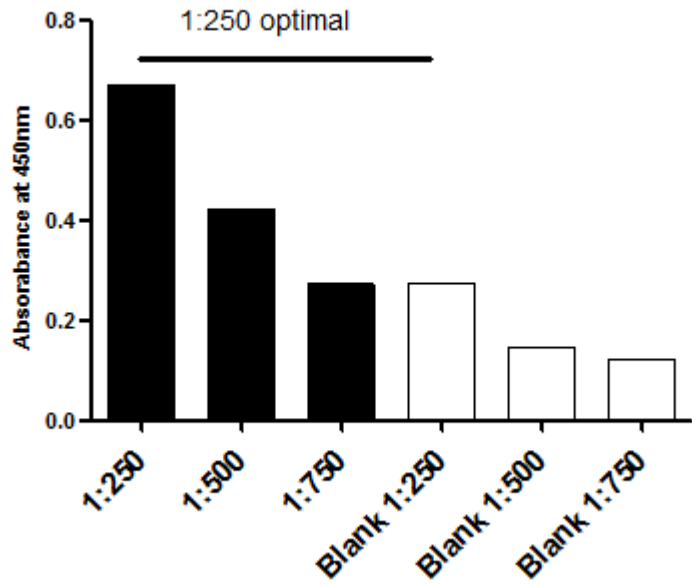

Supplement: MOESM1 [file 9781562]
