# Supplementary material for: Prosaposin activates the androgen receptor and potentiates resistance to endocrine treatment in breast cancer
Source: Springer Nature journal article supplement (doi:10.1186/s13058-015-0636-6), 2015-09-04
Supplement: MOESM2 [file 9781562]

| test_id         | gene_id         | gene          | locus      | value_1 | value_2 | ln.fold_cha | test_stat | p_value | q_value | significant | q1_FPKM     | q1_conf_lo | q1_conf_hi  | q2_FPKM    | q2_conf_lo | q2_conf_hi |
|-----------------|-----------------|---------------|------------|---------|---------|-------------|-----------|---------|---------|-------------|-------------|------------|-------------|------------|------------|------------|
| ENSG00000248399 | ENSG00000248399 | RP11-503N18.4 | 4:2420700  | 7.445   | 0.012   | -6.456      | 11.522    | 0       | 0       | yes         | 7.44544     | 0          | 15.7793     | 0.0116921  | 0.011048   | 0.012337   |
| ENSG00000169314 | ENSG00000169314 | C22orf15      | 22:2410521 | 14.526  | 0.025   | -6.354      | 47.898    | 0       | 0       | yes         | 14.5263     | 11.0916    | 17.961      | 0.0252643  | 0.022223   | 0.028306   |
| ENSG00000223692 | ENSG00000223692 | DIP2A-IT1     | 21:478788  | 0.615   | 0.003   | -5.432      | 6.58      | 0       | 0       | yes         | 0.615422    | 0          | 1.63085     | 0.00269305 | 0.002544   | 0.002842   |
| ENSG00000258790 | ENSG00000258790 | RP11-561B11.2 | 14:355141  | 0.251   | 0.001   | -5.305      | 16.465    | 0       | 0       | yes         | 0.250977    | 0.0897284  | 0.412225    | 0.00124626 | 0.001184   | 0.001309   |
| ENSG00000258657 | ENSG00000258657 | RP11-104E19.1 | 14:250649  | 0.338   | 0.002   | -5.039      | 4.92      | 0       | 0       | yes         | 0.337772    | 0          | 0.838304    | 0.00218794 | 0          | 0.005283   |
| ENSG00000207783 | ENSG00000207783 | MIR564        | 3:4480320  | 302.5   | 2.28    | -4.888      | 12.253    | 0       | 0       | yes         | 302.5       | 64.6701    | 540.33      | 2.28012    | 1.97055    | 2.58969    |
| ENSG00000240758 | ENSG00000240758 | RP11-155G14.5 | 7:1280958  | 14.938  | 0.145   | -4.637      | 31.462    | 0       | 0       | yes         | 14.9376     | 10.7281    | 19.1471     | 0.144725   | 0.13222    | 0.157231   |
| ENSG00000125848 | ENSG00000125848 | FLRT3         | 20:138298  | 0.864   | 0.01    | -4.426      | 3.986     | 0       | 0.001   | yes         | 0.863568    | 0          | 2.75647     | 0.010335   | 0.006681   | 0.013989   |
| ENSG00000174564 | ENSG00000174564 | IL20RB        | 3:1365810  | 10.307  | 0.174   | -4.082      | 8.71      | 0       | 0       | yes         | 10.307      | 8.62059    | 11.9933     | 0.173962   | 0.013423   | 0.334501   |
| ENSG00000233927 | ENSG00000233927 | RPS28         | 19:838638  | 229.943 | 4.919   | -3.845      | 13.736    | 0       | 0       | yes         | 229.943     | 197.971    | 261.914     | 4.91892    | 2.25163    | 7.58622    |
| ENSG00000171056 | ENSG00000171056 | SOX7          | 8:1058127  | 0.362   | 0.008   | -3.835      | 9.332     | 0       | 0       | yes         | 0.362295    | 0.0753251  | 0.649264    | 0.00782442 | 0.006107   | 0.009542   |
| ENSG00000256804 | ENSG00000256804 | RP13-977J11.5 | 12:132568  | 3.048   | 0.084   | -3.592      | 6.566     | 0       | 0       | yes         | 3.04824     | 0          | 6.35748     | 0.0839903  | 0.072587   | 0.095394   |
| ENSG00000204311 | ENSG00000204311 | DFNB59        | 2:1792786  | 4.311   | 0.12    | -3.582      | 4.2       | 0       | 0.001   | yes         | 4.31108     | 2.36436    | 6.25781     | 0.119922   | 0          | 0.31716    |
| ENSG00000125245 | ENSG00000125245 | GPR18         | 13:998530  | 3.602   | 0.101   | -3.573      | 3.86      | 0       | 0.002   | yes         | 3.60199     | 2.53487    | 4.6691      | 0.101066   | 0          | 0.285763   |
| ENSG00000149380 | ENSG00000149380 | P4HA3         | 11:737237  | 0.09    | 0.003   | -3.489      | 4.619     | 0       | 0       | yes         | 0.0901365   | 0          | 0.226221    | 0.002752   | 0.002608   | 0.002896   |
| ENSG00000133808 | ENSG00000133808 | MICALCL       | 11:122976  | 5.722   | 0.184   | -3.435      | 6.113     | 0       | 0       | yes         | 5.72228     | 1.82795    | 9.61661     | 0.184348   | 0.019462   | 0.349233   |
| ENSG00000100385 | ENSG00000100385 | IL2RB         | 22:375151  | 2.847   | 0.098   | -3.371      | 3.512     | 0       | 0.008   | yes         | 2.84711     | 0          | 7.39999     | 0.0977709  | 0          | 0.201623   |
| ENSG00000254827 | ENSG00000254827 | SLC22A18AS    | 11:290900  | 23.618  | 0.839   | -3.337      | 6.473     | 0       | 0       | yes         | 23.6183     | 19.2936    | 27.943      | 0.8392     | 0          | 1.69075    |
| ENSG00000250251 | ENSG00000250251 | PKD1P6        | 16:150685  | 24.63   | 0.884   | -3.327      | 6.459     | 0       | 0       | yes         | 24.6301     | 19.3329    | 29.9273     | 0.884398   | 0          | 1.77541    |
| ENSG00000182177 | ENSG00000182177 | ASB18         | 2:2370738  | 6.251   | 0.226   | -3.318      | 5.025     | 0       | 0       | yes         | 6.25121     | 4.17993    | 8.32249     | 0.226494   | 0          | 0.516015   |
| ENSG00000112182 | ENSG00000112182 | BACH2         | 6:9063624  | 5.044   | 0.185   | -3.307      | 5.708     | 0       | 0       | yes         | 5.04438     | 1.24759    | 8.84118     | 0.184819   | 0.022033   | 0.347605   |
| ENSG00000101082 | ENSG00000101082 | SLA2          | 20:352341  | 4.083   | 0.16    | -3.241      | 5.107     | 0       | 0       | yes         | 4.08261     | 3.24966    | 4.91556     | 0.159721   | 0          | 0.3598     |
| ENSG00000214184 | ENSG00000214184 | AC012487.2    | 2:1090650  | 24.198  | 0.98    | -3.207      | 5.706     | 0       | 0       | yes         | 24.198      | 19.1795    | 29.2165     | 0.979511   | 0          | 2.06172    |
| ENSG00000234925 | ENSG00000234925 | RP11-254B13.3 | 12:690046  | 6.147   | 0.256   | -3.178      | 11.934    | 0       | 0       | yes         | 6.14738     | 3.22737    | 9.0674      | 0.256257   | 0.194557   | 0.317956   |
| ENSG00000137210 | ENSG00000137210 | TMEM14B       | 6:1074797  | 6.81    | 0.286   | -3.171      | 9.147     | 0       | 0       | yes         | 6.80978     | 2.78398    | 10.8356     | 0.285683   | 0.182154   | 0.389212   |
| ENSG00000226312 | ENSG00000226312 | CFLAR-AS1     | 2:2019808  | 8.63    | 0.375   | -3.136      | 3.965     | 0       | 0.002   | yes         | 8.62961     | 0          | 17.4233     | 0.375152   | 0          | 0.828907   |
| ENSG00000241790 | ENSG00000241790 | ENO1P4        | 2:2024849  | 1.312   | 0.058   | -3.122      | 13.898    | 0       | 0       | yes         | 1.3122      | 0.751951   | 1.87245     | 0.0578067  | 0.049712   | 0.065901   |
| ENSG00000235910 | ENSG00000235910 | AP006216.12   | 11:116706  | 0.128   | 0.006   | -3.117      | 40.688    | 0       | 0       | yes         | 0.128288    | 0.115394   | 0.141181    | 0.00568023 | 0.005023   | 0.006337   |
| ENSG00000244122 | ENSG00000244122 | UGT1A7        | 2:2345262  | 5.092   | 0.23    | -3.096      | 6.488     | 0       | 0       | yes         | 5.09177     | 4.03585    | 6.14768     | 0.230352   | 0.015774   | 0.444929   |
| ENSG00000234036 | ENSG00000234036 | RP11-123J14.2 | 4:7787085  | 139.457 | 6.779   | -3.024      | 7.902     | 0       | 0       | yes         | 139.457     | 116.376    | 162.538     | 6.77888    | 1.71339    | 11.8444    |
| ENSG00000258725 | ENSG00000258725 | AC068831.8    | 15:915092  | 2.639   | 0.129   | -3.022      | 3.578     | 0       | 0.006   | yes         | 2.63857     | 1.05682    | 4.22032     | 0.128563   | 0          | 0.33159    |
| ENSG00000155962 | ENSG00000155962 | CLIC2         | X:1545054  | 3.151   | 0.159   | -2.987      | 5.081     | 0       | 0       | yes         | 3.15067     | 1.41478    | 4.88655     | 0.158953   | 0          | 0.324033   |
| ENSG00000178796 | ENSG00000178796 | RIIAD1        | 1:1516735  | 18.002  | 0.926   | -2.967      | 16.093    | 0       | 0       | yes         | 18.0017     | 12.8089    | 23.1945     | 0.926428   | 0.713673   | 1.13918    |
| ENSG00000174527 | ENSG00000174527 | MYO1H         | 12:109826  | 1.44    | 0.075   | -2.957      | 5.737     | 0       | 0       | yes         | 1.43952     | 0          | 2.92205     | 0.0748325  | 0.071599   | 0.078066   |
| ENSG00000228925 | ENSG00000228925 | AC016722.4    | 2:4712641  | 0.272   | 0.015   | -2.92       | 6.315     | 0       | 0       | yes         | 0.271946    | 0.0208325  | 0.52306     | 0.0146735  | 0.013961   | 0.015386   |
| ENSG00000249119 | ENSG00000249119 | MTND6P4       | 5:1342405  | 0.568   | 0.031   | -2.912      | 4.004     | 0       | 0.001   | yes         | 0.567641    | 0          | 1.38721     | 0.0308725  | 0.025457   | 0.036288   |
| ENSG00000143627 | ENSG00000143627 | PKLR          | 1:1552326  | 0.349   | 0.02    | -2.884      | 6.702     | 0       | 0       | yes         | 0.349047    | 0.0494582  | 0.648636    | 0.0195231  | 0.018311   | 0.020735   |
| ENSG00000258509 | ENSG00000258509 | RP11-857B24.3 | 14:453460  | 30.421  | 1.747   | -2.857      | 3.756     | 0       | 0.003   | yes         | 30.4206     | 20.1423    | 40.699      | 1.74656    | 0          | 4.33766    |
| ENSG00000151117 | ENSG00000151117 | TMEM86A       | 11:187146  | 4.276   | 0.253   | -2.826      | 4.148     | 0       | 0.001   | yes         | 4.27584     | 0          | 9.14331     | 0.253346   | 0.063645   | 0.443046   |
| ENSG00000137101 | ENSG00000137101 | CD72          | 9:3560528  | 6.586   | 0.395   | -2.814      | 3.739     | 0       | 0.004   | yes         | 6.58604     | 5.24258    | 7.92949     | 0.394945   | 0          | 0.983918   |
| ENSG00000103023 | ENSG00000103023 | PRSS54        | 16:582838  | 2.957   | 0.18    | -2.798      | 3.82      | 0       | 0.003   | yes         | 2.95661     | 2.0841     | 3.82911     | 0.180117   | 0          | 0.43861    |
| ENSG00000214597 | ENSG00000214597 | GS1-393G12.10 | 8:1455758  | 5.081   | 0.333   | -2.726      | 6.036     | 0       | 0       | yes         | 5.08064     | 3.34341    | 6.81787     | 0.332689   | 0.054542   | 0.610836   |
| ENSG00000090530 | ENSG00000090530 | LEPREL1       | 3:1896745  | 2.702   | 0.178   | -2.72       | 5.45      | 0       | 0       | yes         | 2.70206     | 1.08222    | 4.3219      | 0.177942   | 0.035891   | 0.319993   |
| ENSG00000169184 | ENSG00000169184 | MN1           | 22:281442  | 3.244   | 0.228   | -2.655      | 6.335     | 0       | 0       | yes         | 3.2435      | 1.06119    | 5.42582     | 0.227976   | 0.113988   | 0.341963   |
| ENSG00000256028 | ENSG00000256028 | RP11-197N18.4 | 12:123405  | 0.965   | 0.068   | -2.65       | 5.194     | 0       | 0       | yes         | 0.965272    | 0.723595   | 1.20695     | 0.0681775  | 0.000722   | 0.135633   |
| ENSG00000229951 | ENSG00000229951 | AC104695.3    | 2:2860727  | 4.253   | 0.303   | -2.64       | 7.084     | 0       | 0       | yes         | 4.25331     | 3.47754    | 5.02908     | 0.303433   | 0.084135   | 0.522731   |
| ENSG00000178836 | ENSG00000178836 | AC114812.5    | 2:2345262  | 0.001   | 0       | -2.588      | 37.18     | 0       | 0       | yes         | 0.000645009 | 0.0005833  | 0.000706719 | 4.85E-05   | 4.36E-05   | 5.34E-05   |
| ENSG00000245281 | ENSG00000245281 | CTD-2547L16.1 | 8:1791393  | 1.169   | 0.088   | -2.585      | 6.396     | 0       | 0       | yes         | 1.16921     | 0.22709    | 2.11133     | 0.088175   | 0.082601   | 0.093749   |
| ENSG00000253213 | ENSG00000253213 | RP11-546B8.3  | 5:1702888  | 0.028   | 0.002   | -2.556      | 25.109    | 0       | 0       | yes         | 0.0283536   | 0.0242823  | 0.032425    | 0.00220047 | 0.001883   | 0.002518   |

|                 |                 |                  |           |         |        |        |        |   |           |           |            |           |            |          |          |
|-----------------|-----------------|------------------|-----------|---------|--------|--------|--------|---|-----------|-----------|------------|-----------|------------|----------|----------|
| ENSG00000164621 | ENSG00000164621 | SMAD5-AS1        | 5:1354651 | 0.018   | 0.001  | -2.526 | 39.234 | 0 | 0 yes     | 0.0179531 | 0.0163846  | 0.0195217 | 0.00143569 | 0.0013   | 0.001572 |
| ENSG00000151743 | ENSG00000151743 | AMN1             | 12:318000 | 13.765  | 1.123  | -2.506 | 7.436  | 0 | 0 yes     | 13.7649   | 9.38501    | 18.1448   | 1.1229     | 0.455577 | 1.79023  |
| ENSG00000224437 | ENSG00000224437 | RP11-161E22.2    | 9:7314994 | 3.129   | 0.261  | -2.483 | 5.8    | 0 | 0 yes     | 3.12938   | 1.32263    | 4.93612   | 0.261175   | 0.095993 | 0.426357 |
| ENSG00000070601 | ENSG00000070601 | FRMPD1           | 9:3751088 | 0.055   | 0.005  | -2.469 | 5.865  | 0 | 0 yes     | 0.0549545 | 0.00872542 | 0.101184  | 0.00465102 | 0.004471 | 0.004831 |
| ENSG00000255905 | ENSG00000255905 | AL391319.1       | 6:1688418 | 0.047   | 0.004  | -2.46  | 15.107 | 0 | 0 yes     | 0.0470497 | 0.036395   | 0.0577044 | 0.00401902 | 0.003078 | 0.00496  |
| ENSG00000104976 | ENSG00000104976 | SNAPC2           | 19:798519 | 393.498 | 34.137 | -2.445 | 4.413  | 0 | 0 yes     | 393.498   | 0          | 826.025   | 34.1372    | 29.3828  | 38.8916  |
| ENSG00000175892 | ENSG00000175892 | AC009336.1       | 2:1769863 | 0.423   | 0.037  | -2.439 | 6.238  | 0 | 0 yes     | 0.422905  | 0.103128   | 0.742682  | 0.0369142  | 0.029568 | 0.044261 |
| ENSG00000237779 | ENSG00000237779 | ZNF638-IT1       | 2:7150369 | 0.722   | 0.064  | -2.422 | 5.28   | 0 | 0 yes     | 0.722333  | 0.0608015  | 1.38386   | 0.0641116  | 0.060744 | 0.067479 |
| ENSG00000160844 | ENSG00000160844 | GATS             | 7:9977518 | 1.514   | 0.135  | -2.414 | 4.2    | 0 | 0.001 yes | 1.51418   | 1.03823    | 1.99013   | 0.135487   | 0        | 0.285275 |
| ENSG00000206874 | ENSG00000206874 | SNORD26          | 11:626194 | 316.353 | 28.919 | -2.392 | 4.047  | 0 | 0.001 yes | 316.353   | 0          | 689.155   | 28.9186    | 26.1295  | 31.7078  |
| ENSG00000226055 | ENSG00000226055 | PAICSP1          | 9:3751088 | 0.436   | 0.04   | -2.379 | 5.156  | 0 | 0 yes     | 0.435887  | 0.0340191  | 0.837755  | 0.0403932  | 0.03883  | 0.041957 |
| ENSG00000162643 | ENSG00000162643 | WDR63            | 1:8546482 | 0.331   | 0.031  | -2.36  | 11.254 | 0 | 0 yes     | 0.331315  | 0.227287   | 0.435344  | 0.0312811  | 0.022584 | 0.039979 |
| ENSG00000230165 | ENSG00000230165 | CTB-1144G6.5     | 10:115999 | 7.864   | 0.754  | -2.345 | 4.621  | 0 | 0 yes     | 7.86361   | 3.12149    | 12.6057   | 0.753668   | 0.138301 | 1.36903  |
| ENSG00000237317 | ENSG00000237317 | RP4-809F4.1      | 1:1740844 | 0.996   | 0.096  | -2.34  | 6.267  | 0 | 0 yes     | 0.996419  | 0.27848    | 1.71436   | 0.09599    | 0.077165 | 0.114815 |
| ENSG00000111780 | ENSG00000111780 | GATC             | 12:120875 | 16.285  | 1.571  | -2.338 | 5.138  | 0 | 0 yes     | 16.2847   | 12.0873    | 20.482    | 1.57116    | 0.199486 | 2.94284  |
| ENSG00000244723 | ENSG00000244723 | ASLP1            | 22:239506 | 0.218   | 0.022  | -2.28  | 26.344 | 0 | 0 yes     | 0.217937  | 0.191262   | 0.244613  | 0.0222906  | 0.019562 | 0.025019 |
| ENSG00000235939 | ENSG00000235939 | RP11-123B3.2     | 10:506273 | 1.754   | 0.18   | -2.274 | 4.687  | 0 | 0 yes     | 1.75362   | 0.0654733  | 3.44177   | 0.18044    | 0.158518 | 0.202361 |
| ENSG00000124920 | ENSG00000124920 | C11orf9          | 11:614479 | 6.545   | 0.682  | -2.261 | 5.071  | 0 | 0 yes     | 6.54518   | 5.70639    | 7.38397   | 0.682177   | 0.080161 | 1.28419  |
| ENSG00000136842 | ENSG00000136842 | TMOD1            | 9:1002634 | 4.629   | 0.484  | -2.258 | 7.558  | 0 | 0 yes     | 4.62912   | 3.82934    | 5.42889   | 0.484214   | 0.207318 | 0.761111 |
| ENSG00000228172 | ENSG00000228172 | RP1-317E23.3     | 1:2612666 | 10.216  | 1.074  | -2.253 | 3.664  | 0 | 0.005 yes | 10.216    | 6.24467    | 14.1874   | 1.07391    | 0        | 2.32683  |
| ENSG00000240038 | ENSG00000240038 | AMY2B            | 1:1040683 | 5.695   | 0.599  | -2.251 | 3.907  | 0 | 0.002 yes | 5.69469   | 2.51115    | 8.87822   | 0.59947    | 0        | 1.20366  |
| ENSG00000149089 | ENSG00000149089 | APIP             | 11:348746 | 13.39   | 1.465  | -2.213 | 7.268  | 0 | 0 yes     | 13.3902   | 11.048     | 15.7324   | 1.46468    | 0.610332 | 2.31902  |
| ENSG00000140009 | ENSG00000140009 | ESR2             | 14:643196 | 0.788   | 0.09   | -2.17  | 6.142  | 0 | 0 yes     | 0.787721  | 0.41898    | 1.15646   | 0.0899757  | 0.042363 | 0.137588 |
| ENSG00000214050 | ENSG00000214050 | FBXO16           | 8:2820310 | 20.786  | 2.379  | -2.168 | 6.89   | 0 | 0 yes     | 20.7858   | 15.9272    | 25.6444   | 2.37908    | 0.989211 | 3.76895  |
| ENSG00000120068 | ENSG00000120068 | HOXB8            | 17:466845 | 0.555   | 0.064  | -2.154 | 11.432 | 0 | 0 yes     | 0.554991  | 0.375949   | 0.734033  | 0.0643983  | 0.051859 | 0.076937 |
| ENSG00000253256 | ENSG00000253256 | CTB-11I22.1      | 5:1585844 | 0.085   | 0.01   | -2.145 | 24.853 | 0 | 0 yes     | 0.0845695 | 0.07414    | 0.0949991 | 0.00989616 | 0.0087   | 0.011092 |
| ENSG00000139626 | ENSG00000139626 | ITGB7            | 12:535851 | 7.422   | 0.881  | -2.131 | 6.777  | 0 | 0 yes     | 7.42219   | 4.52156    | 10.3228   | 0.881039   | 0.446925 | 1.31515  |
| ENSG00000233547 | ENSG00000233547 | RP11-57H14.2     | 10:114710 | 0.293   | 0.035  | -2.124 | 27.256 | 0 | 0 yes     | 0.292525  | 0.262552   | 0.322498  | 0.0349714  | 0.030864 | 0.039079 |
| ENSG00000099958 | ENSG00000099958 | DERL3            | 22:241291 | 1.443   | 0.174  | -2.117 | 3.524  | 0 | 0.008 yes | 1.44348   | 0.329431   | 2.55753   | 0.173812   | 0.013794 | 0.333831 |
| ENSG00000250604 | ENSG00000250604 | RP11-597D13.8    | 4:1590456 | 3.931   | 0.493  | -2.077 | 5.391  | 0 | 0 yes     | 3.93124   | 0.91327    | 6.94921   | 0.492775   | 0.460544 | 0.525006 |
| ENSG00000220739 | ENSG00000220739 | RP11-277I20.3    | 6:1446068 | 1.697   | 0.213  | -2.076 | 3.683  | 0 | 0.004 yes | 1.69744   | 0          | 3.60712   | 0.212815   | 0.196234 | 0.229395 |
| ENSG00000228775 | ENSG00000228775 | RP5-894A10.5     | 7:1414041 | 12.069  | 1.526  | -2.068 | 6.327  | 0 | 0 yes     | 12.0694   | 10.0148    | 14.124    | 1.52574    | 0.562603 | 2.48887  |
| ENSG00000258232 | ENSG00000258232 | RP11-161H23.5    | 12:495785 | 6.075   | 0.783  | -2.049 | 3.642  | 0 | 0.005 yes | 6.0752    | 3.86754    | 8.28285   | 0.782994   | 0        | 1.61684  |
| ENSG00000235681 | ENSG00000235681 | AC008746.5       | 19:549559 | 9.122   | 1.243  | -1.993 | 3.881  | 0 | 0.002 yes | 9.12152   | 0          | 18.4835   | 1.2429     | 1.19272  | 1.29308  |
| ENSG00000235529 | ENSG00000235529 | AGAP1-IT1        | 2:2364027 | 1.628   | 0.222  | -1.992 | 5.578  | 0 | 0 yes     | 1.628     | 0.472879   | 2.78312   | 0.222202   | 0.204483 | 0.239922 |
| ENSG00000164129 | ENSG00000164129 | NPY5R            | 4:1642451 | 3.679   | 0.503  | -1.991 | 4.559  | 0 | 0 yes     | 3.67878   | 2.66747    | 4.69009   | 0.502546   | 0.085965 | 0.919127 |
| ENSG00000184669 | ENSG00000184669 | RP11-466H18.2    | 11:167998 | 6.594   | 0.902  | -1.99  | 3.589  | 0 | 0.006 yes | 6.59384   | 1.29453    | 11.8932   | 0.901762   | 0.213245 | 1.59028  |
| ENSG00000226363 | ENSG00000226363 | AC009336.24      | 2:1769863 | 0.807   | 0.115  | -1.952 | 5.265  | 0 | 0 yes     | 0.806851  | 0.230583   | 1.38312   | 0.1146     | 0.091794 | 0.137406 |
| ENSG00000248930 | ENSG00000248930 | CTC-250P20.1-001 | 5:7225180 | 1.084   | 0.155  | -1.948 | 4.009  | 0 | 0.001 yes | 1.08448   | 0.042193   | 2.12676   | 0.154624   | 0.132479 | 0.17677  |
| ENSG00000164241 | ENSG00000164241 | AC004507.1       | 5:1263782 | 6.496   | 0.94   | -1.933 | 4.045  | 0 | 0.001 yes | 6.49591   | 2.33663    | 10.6552   | 0.939593   | 0.27248  | 1.60671  |
| ENSG00000254140 | ENSG00000254140 | RP11-731F5.1     | 14:106064 | 1.735   | 0.257  | -1.91  | 3.642  | 0 | 0.005 yes | 1.73525   | 0.319154   | 3.15134   | 0.257064   | 0.087816 | 0.426313 |
| ENSG00000168028 | ENSG00000168028 | RPSA             | 3:3944817 | 108.764 | 16.116 | -1.909 | 12.332 | 0 | 0 yes     | 108.764   | 96.1954    | 121.333   | 16.1156    | 11.4858  | 20.7454  |
| ENSG00000241762 | ENSG00000241762 | AC002314.3       | 19:361954 | 1.166   | 0.175  | -1.899 | 4.108  | 0 | 0.001 yes | 1.16571   | 0.215626   | 2.1158    | 0.174551   | 0.098371 | 0.250732 |
| ENSG00000255282 | ENSG00000255282 | RP11-725K16.4    | 11:102617 | 2.15    | 0.328  | -1.88  | 3.918  | 0 | 0.002 yes | 2.14966   | 0.722497   | 3.57682   | 0.328062   | 0.100775 | 0.555349 |
| ENSG00000145040 | ENSG00000145040 | UCN2             | 3:4855511 | 0.074   | 0.011  | -1.873 | 17.881 | 0 | 0 yes     | 0.0743972 | 0.0636025  | 0.0851919 | 0.0114275  | 0.0097   | 0.013155 |
| ENSG00000232626 | ENSG00000232626 | RP11-175B9.2     | 1:2023178 | 2.971   | 0.459  | -1.867 | 3.608  | 0 | 0.006 yes | 2.97148   | 1.89502    | 4.04795   | 0.459477   | 0.01413  | 0.904823 |
| ENSG00000119703 | ENSG00000119703 | FAM164C          | 14:755199 | 10.295  | 1.634  | -1.841 | 4.747  | 0 | 0 yes     | 10.2951   | 7.32895    | 13.2612   | 1.63419    | 0.457685 | 2.81069  |
| ENSG00000226746 | ENSG00000226746 | SMCR5            | 17:175847 | 0.203   | 0.033  | -1.818 | 4.331  | 0 | 0 yes     | 0.203313  | 0.032611   | 0.374014  | 0.0329964  | 0.03244  | 0.033553 |
| ENSG00000110719 | ENSG00000110719 | TCIRG1           | 11:678064 | 303.607 | 50.932 | -1.785 | 10.184 | 0 | 0 yes     | 303.607   | 252.907    | 354.308   | 50.9323    | 35.2305  | 66.6341  |
| ENSG00000223534 | ENSG00000223534 | HLA-DQB1-AS1     | 6:3262724 | 0.27    | 0.046  | -1.778 | 23.65  | 0 | 0 yes     | 0.269941  | 0.242946   | 0.296935  | 0.0455955  | 0.040474 | 0.050717 |

|                 |                 |                    |           |         |         |        |        |   |       |     |            |            |            |            |          |          |
|-----------------|-----------------|--------------------|-----------|---------|---------|--------|--------|---|-------|-----|------------|------------|------------|------------|----------|----------|
| ENSG00000180385 | ENSG00000180385 | AC034193.5         | 3:1000422 | 36.92   | 6.395   | -1.753 | 9.842  | 0 | 0     | yes | 36.9198    | 30.161     | 43.6786    | 6.39469    | 4.44025  | 8.34914  |
| ENSG00000124279 | ENSG00000124279 | FASTKD3            | 5:7830490 | 8.195   | 1.429   | -1.746 | 5.202  | 0 | 0     | yes | 8.19503    | 6.39848    | 9.99158    | 1.42942    | 0.522344 | 2.3365   |
| ENSG00000230371 | ENSG00000230371 | KARSP2             | 13:113777 | 0.029   | 0.005   | -1.735 | 3.964  | 0 | 0.002 | yes | 0.0294834  | 0.0142582  | 0.0447085  | 0.00519893 | 0.001523 | 0.008875 |
| ENSG00000164053 | ENSG00000164053 | ATRIP              | 3:4848811 | 13.15   | 2.36    | -1.718 | 10.74  | 0 | 0     | yes | 13.1496    | 10.9684    | 15.3307    | 2.36011    | 1.71465  | 3.00558  |
| ENSG00000139974 | ENSG00000139974 | SLC38A6            | 14:612014 | 55.478  | 9.977   | -1.716 | 10.091 | 0 | 0     | yes | 55.4781    | 47.3364    | 63.6197    | 9.97678    | 6.91646  | 13.0371  |
| ENSG00000159082 | ENSG00000159082 | SYNJ1              | 21:339967 | 22.883  | 4.123   | -1.714 | 3.579  | 0 | 0.006 | yes | 22.8832    | 11.603     | 34.1633    | 4.12343    | 0.738114 | 7.50875  |
| ENSG00000227199 | ENSG00000227199 | ST7-AS1            | 7:1165924 | 0.267   | 0.048   | -1.709 | 3.696  | 0 | 0.004 | yes | 0.266919   | 0.022151   | 0.511686   | 0.0483484  | 0.04269  | 0.054007 |
| ENSG00000138495 | ENSG00000138495 | COX17              | 3:1193553 | 8.081   | 1.476   | -1.7   | 3.785  | 0 | 0.003 | yes | 8.08109    | 5.19408    | 10.9681    | 1.47591    | 0.259302 | 2.69251  |
| ENSG00000258388 | ENSG00000258388 | XXbac-BPG300A18.12 | 6:3211613 | 4.809   | 0.881   | -1.697 | 5.342  | 0 | 0     | yes | 4.80856    | 3.43357    | 6.18354    | 0.88139    | 0.38141  | 1.38137  |
| ENSG00000258136 | ENSG00000258136 | RP11-864J10.4      | 12:108126 | 2.595   | 0.48    | -1.688 | 4.052  | 0 | 0.001 | yes | 2.59527    | 1.22852    | 3.96203    | 0.479982   | 0.170201 | 0.789762 |
| ENSG00000134013 | ENSG00000134013 | LOXL2              | 8:2315470 | 13.169  | 2.439   | -1.686 | 5.697  | 0 | 0     | yes | 13.1694    | 9.81376    | 16.525     | 2.43855    | 1.13529  | 3.74182  |
| ENSG00000163762 | ENSG00000163762 | TM4SF18            | 3:1489471 | 22.081  | 4.268   | -1.643 | 7.098  | 0 | 0     | yes | 22.0809    | 17.745     | 26.4168    | 4.26847    | 2.47835  | 6.0586   |
| ENSG00000188818 | ENSG00000188818 | ZDHHC11            | 5:710470  | 6.765   | 1.308   | -1.643 | 3.954  | 0 | 0.002 | yes | 6.76507    | 3.99297    | 9.53716    | 1.30806    | 0.3621   | 2.25403  |
| ENSG00000241738 | ENSG00000241738 | ZNF90P1            | 3:1010430 | 0.016   | 0.003   | -1.633 | 9.557  | 0 | 0     | yes | 0.0155059  | 0.0117725  | 0.0192393  | 0.00302894 | 0.002294 | 0.003764 |
| ENSG00000083535 | ENSG00000083535 | PIBF1              | 13:733020 | 32.787  | 6.444   | -1.627 | 7.618  | 0 | 0     | yes | 32.7873    | 26.8371    | 38.7376    | 6.44361    | 3.95208  | 8.93514  |
| ENSG00000251003 | ENSG00000251003 | RP11-152P17.2      | 8:1056029 | 4.437   | 0.872   | -1.627 | 4.28   | 0 | 0     | yes | 4.43745    | 2.293      | 6.58191    | 0.872254   | 0.360479 | 1.38403  |
| ENSG00000114270 | ENSG00000114270 | COL7A1             | 3:4860150 | 29.065  | 5.785   | -1.614 | 7.213  | 0 | 0     | yes | 29.0651    | 23.2309    | 34.8992    | 5.78497    | 3.4707   | 8.09924  |
| ENSG00000127928 | ENSG00000127928 | GNGT1              | 7:9322088 | 19      | 3.898   | -1.584 | 5.274  | 0 | 0     | yes | 18.9999    | 14.6244    | 23.3753    | 3.89848    | 1.7357   | 6.06126  |
| ENSG00000042317 | ENSG00000042317 | SPATA7             | 14:888512 | 23.975  | 4.934   | -1.581 | 8.538  | 0 | 0     | yes | 23.9745    | 19.644     | 28.305     | 4.93377    | 3.33885  | 6.5287   |
| ENSG00000237149 | ENSG00000237149 | NCRNA00245         | 10:770295 | 28.511  | 5.865   | -1.581 | 8.479  | 0 | 0     | yes | 28.5111    | 23.3639    | 33.6582    | 5.86522    | 3.95105  | 7.77939  |
| ENSG00000185278 | ENSG00000185278 | ZBTB37             | 1:1738312 | 9.636   | 2.034   | -1.555 | 8.307  | 0 | 0     | yes | 9.63578    | 7.86874    | 11.4028    | 2.03404    | 1.36992  | 2.69817  |
| ENSG00000208038 | ENSG00000208038 | MIR492             | 12:952279 | 1890.11 | 401.821 | -1.548 | 5.745  | 0 | 0     | yes | 1890.11    | 1462.02    | 2318.19    | 401.821    | 205.263  | 598.38   |
| ENSG00000109475 | ENSG00000109475 | RPL34              | 4:1095417 | 44.562  | 9.519   | -1.544 | 6.383  | 0 | 0     | yes | 44.5616    | 35.7264    | 53.3969    | 9.5191     | 5.31971  | 13.7185  |
| ENSG00000114735 | ENSG00000114735 | HEMK1              | 3:5059546 | 5.22    | 1.115   | -1.544 | 4.945  | 0 | 0     | yes | 5.21977    | 3.67959    | 6.75994    | 1.11459    | 0.501185 | 1.72799  |
| ENSG00000185482 | ENSG00000185482 | STAC3              | 12:576372 | 10.835  | 2.33    | -1.537 | 5.981  | 0 | 0     | yes | 10.8345    | 8.54669    | 13.1224    | 2.32985    | 1.23818  | 3.42152  |
| ENSG00000185633 | ENSG00000185633 | NDUFA4L2           | 12:576231 | 15.954  | 3.45    | -1.531 | 9.419  | 0 | 0     | yes | 15.9541    | 13.3605    | 18.5477    | 3.44969    | 2.47812  | 4.42127  |
| ENSG00000100399 | ENSG00000100399 | CHADL              | 22:416012 | 8.562   | 1.867   | -1.523 | 5.598  | 0 | 0     | yes | 8.5624     | 6.86899    | 10.2558    | 1.86655    | 0.920084 | 2.81302  |
| ENSG00000174748 | ENSG00000174748 | RPL15              | 3:2393315 | 192.602 | 44.092  | -1.474 | 20.306 | 0 | 0     | yes | 192.602    | 173.422    | 211.782    | 44.0924    | 39.4324  | 48.7525  |
| ENSG00000139351 | ENSG00000139351 | SYCP3              | 12:102090 | 0.941   | 0.218   | -1.463 | 4.451  | 0 | 0     | yes | 0.940636   | 0.32458    | 1.55669    | 0.217798   | 0.205423 | 0.230172 |
| ENSG00000227802 | ENSG00000227802 | DNAJB3             | 2:2345262 | 0.002   | 0.001   | -1.461 | 20.993 | 0 | 0     | yes | 0.00225155 | 0.00203614 | 0.00246696 | 0.00052216 | 0.000469 | 0.000575 |
| ENSG00000254208 | ENSG00000254208 | RP11-219B4.3       | 8:8608945 | 0.122   | 0.028   | -1.455 | 14.104 | 0 | 0     | yes | 0.121523   | 0.103937   | 0.13911    | 0.0283656  | 0.024195 | 0.032537 |
| ENSG00000115252 | ENSG00000115252 | PDE1A              | 2:1830047 | 5.704   | 1.334   | -1.453 | 3.568  | 0 | 0.007 | yes | 5.70444    | 3.36286    | 8.04601    | 1.33442    | 0.396046 | 2.2728   |
| ENSG00000166046 | ENSG00000166046 | TCP11L2            | 12:106631 | 47.16   | 11.105  | -1.446 | 3.545  | 0 | 0.007 | yes | 47.1602    | 11.4617    | 82.8586    | 11.1046    | 7.72573  | 14.4836  |
| ENSG00000166181 | ENSG00000166181 | API5               | 11:433335 | 49.6    | 11.861  | -1.431 | 9.765  | 0 | 0     | yes | 49.6003    | 41.8889    | 57.3118    | 11.8611    | 8.91492  | 14.8074  |
| ENSG00000197128 | ENSG00000197128 | ZNF772             | 19:579809 | 3.012   | 0.73    | -1.417 | 4.461  | 0 | 0     | yes | 3.01181    | 2.02817    | 3.99545    | 0.729938   | 0.332091 | 1.12779  |
| ENSG00000137877 | ENSG00000137877 | SPTBN5             | 15:421202 | 0.915   | 0.222   | -1.416 | 6.216  | 0 | 0     | yes | 0.915274   | 0.72372    | 1.10683    | 0.222036   | 0.132156 | 0.311916 |
| ENSG00000000938 | ENSG00000000938 | FGR                | 1:2793857 | 5.893   | 1.445   | -1.406 | 3.839  | 0 | 0.003 | yes | 5.89346    | 3.90753    | 7.87938    | 1.44463    | 0.50524  | 2.38401  |
| ENSG00000142875 | ENSG00000142875 | PRKACB             | 1:8454374 | 18.09   | 4.45    | -1.403 | 10.209 | 0 | 0     | yes | 18.0904    | 14.5041    | 21.6766    | 4.44986    | 3.60332  | 5.29641  |
| ENSG00000111817 | ENSG00000111817 | DSE                | 6:1165753 | 25.54   | 6.372   | -1.388 | 12.408 | 0 | 0     | yes | 25.5403    | 21.5957    | 29.4848    | 6.37196    | 5.34004  | 7.40388  |
| ENSG00000230536 | ENSG00000230536 | RP11-379C10.4      | 9:1308235 | 0.033   | 0.008   | -1.382 | 33.475 | 0 | 0     | yes | 0.0328582  | 0.0310459  | 0.0346704  | 0.00824886 | 0.007742 | 0.008756 |
| ENSG00000020922 | ENSG00000020922 | MRE11A             | 11:941528 | 11.58   | 2.91    | -1.381 | 3.603  | 0 | 0.006 | yes | 11.5801    | 3.22346    | 19.9367    | 2.90984    | 2.15578  | 3.66391  |
| ENSG00000224424 | ENSG00000224424 | PRKAR2A-AS1        | 3:4878202 | 15.135  | 3.894   | -1.358 | 5.416  | 0 | 0     | yes | 15.1354    | 11.6676    | 18.6032    | 3.89429    | 2.15803  | 5.63055  |
| ENSG00000229920 | ENSG00000229920 | AC016734.3         | 2:6334851 | 0.135   | 0.035   | -1.342 | 31.994 | 0 | 0     | yes | 0.134884   | 0.127138   | 0.142629   | 0.0352537  | 0.033098 | 0.037409 |
| ENSG00000231365 | ENSG00000231365 | RP11-418J17.1      | 1:1195738 | 6.348   | 1.669   | -1.336 | 3.771  | 0 | 0.003 | yes | 6.34803    | 4.17998    | 8.51608    | 1.66923    | 0.633184 | 2.70527  |
| ENSG00000156931 | ENSG00000156931 | VPS8               | 3:1845299 | 45.103  | 11.97   | -1.327 | 6.386  | 0 | 0     | yes | 45.1025    | 28.629     | 61.5761    | 11.9696    | 9.59972  | 14.3395  |
| ENSG00000181826 | ENSG00000181826 | RELL1              | 4:3745556 | 13.886  | 3.687   | -1.326 | 6.674  | 0 | 0     | yes | 13.8863    | 11.3665    | 16.4061    | 3.6871     | 2.3836   | 4.99061  |
| ENSG00000247828 | ENSG00000247828 | CTC-358I24.1       | 5:8748544 | 13.217  | 3.518   | -1.324 | 4.12   | 0 | 0.001 | yes | 13.2166    | 8.39732    | 18.036     | 3.51829    | 1.65706  | 5.37953  |
| ENSG00000198003 | ENSG00000198003 | CCDC151            | 19:115312 | 4.428   | 1.18    | -1.322 | 5.406  | 0 | 0     | yes | 4.42804    | 3.47168    | 5.38439    | 1.18031    | 0.662233 | 1.69839  |
| ENSG00000227328 | ENSG00000227328 | TEKT4P2            | 21:990718 | 2.792   | 0.752   | -1.312 | 3.725  | 0 | 0.004 | yes | 2.79195    | 1.92203    | 3.66186    | 0.751825   | 0.276888 | 1.22676  |
| ENSG00000244926 | ENSG00000244926 | RP11-613D13.7      | 11:439023 | 0.223   | 0.06    | -1.31  | 10.84  | 0 | 0     | yes | 0.222589   | 0.182863   | 0.262315   | 0.0600518  | 0.050262 | 0.069841 |

|                 |                 |               |                   |         |        |        |        |   |       |     |           |           |          |           |          |          |
|-----------------|-----------------|---------------|-------------------|---------|--------|--------|--------|---|-------|-----|-----------|-----------|----------|-----------|----------|----------|
| ENSG00000100600 | ENSG00000100600 | LGMN          | 14:931701!        | 73.709  | 20.151 | -1.297 | 11.106 | 0 | 0     | yes | 73.7089   | 62.7823   | 84.6356  | 20.1513   | 16.5145  | 23.7881  |
| ENSG00000185567 | ENSG00000185567 | AHNAK2        | 14:105403!        | 1.466   | 0.402  | -1.295 | 3.919  | 0 | 0.002 | yes | 1.46621   | 0.690674  | 2.24174  | 0.401762  | 0.242725 | 0.560799 |
| ENSG00000235423 | ENSG00000235423 | RP11-282O18.3 | 12:123636!        | 18.16   | 5      | -1.29  | 4.299  | 0 | 0     | yes | 18.1602   | 10.1397   | 26.1806  | 4.99984   | 2.96862  | 7.03106  |
| ENSG00000118849 | ENSG00000118849 | RARRES1       | 3:1584146!        | 0.193   | 0.054  | -1.283 | 16.998 | 0 | 0     | yes | 0.19318   | 0.173148  | 0.213213 | 0.0535308 | 0.047655 | 0.059407 |
| ENSG00000147403 | ENSG00000147403 | RPL10         | X:1536183         | 127.057 | 35.298 | -1.281 | 14.346 | 0 | 0     | yes | 127.057   | 114.563   | 139.55   | 35.298    | 30.0371  | 40.559   |
| ENSG00000111775 | ENSG00000111775 | COX6A1        | 12:120875!        | 58.055  | 16.138 | -1.28  | 8.405  | 0 | 0     | yes | 58.0548   | 48.9214   | 67.1882  | 16.1383   | 11.9287  | 20.3478  |
| ENSG00000131876 | ENSG00000131876 | SNRPA1        | 15:101821         | 17.471  | 4.86   | -1.28  | 5.495  | 0 | 0     | yes | 17.4709   | 11.4359   | 23.5058  | 4.85985   | 3.34189  | 6.37782  |
| ENSG00000151093 | ENSG00000151093 | OXSM          | 3:2576043!        | 31.742  | 8.843  | -1.278 | 9.318  | 0 | 0     | yes | 31.7422   | 27.2379   | 36.2466  | 8.84289   | 6.76682  | 10.919   |
| ENSG00000155755 | ENSG00000155755 | TMEM237       | 2:2024849!        | 21.226  | 5.919  | -1.277 | 7.708  | 0 | 0     | yes | 21.2261   | 17.026    | 25.4261  | 5.91876   | 4.34568  | 7.49184  |
| ENSG00000130997 | ENSG00000130997 | POLN          | 4:2073644!        | 30.19   | 8.466  | -1.271 | 9.729  | 0 | 0     | yes | 30.1904   | 24.7912   | 35.5895  | 8.46629   | 6.85268  | 10.0799  |
| ENSG00000185684 | ENSG00000185684 | EP400NL       | 12:132568!        | 43.468  | 12.289 | -1.263 | 10.302 | 0 | 0     | yes | 43.4676   | 36.8079   | 50.1274  | 12.2892   | 9.93574  | 14.6426  |
| ENSG00000254093 | ENSG00000254093 | PINX1         | 8:1058127         | 24.103  | 6.835  | -1.26  | 5.602  | 0 | 0     | yes | 24.1034   | 15.0943   | 33.1126  | 6.83537   | 5.12386  | 8.54688  |
| ENSG00000175147 | ENSG00000175147 | C1orf126      | 1:1492519!        | 7.391   | 2.098  | -1.259 | 8.062  | 0 | 0     | yes | 7.39064   | 6.27297   | 8.50831  | 2.09827   | 1.52484  | 2.6717   |
| ENSG00000004766 | ENSG00000004766 | CCDC132       | 7:9286165!        | 64.422  | 18.359 | -1.255 | 10.495 | 0 | 0     | yes | 64.4223   | 56.5939   | 72.2508  | 18.3593   | 14.5762  | 22.1423  |
| ENSG00000008130 | ENSG00000008130 | NADK          | 1:1682670!        | 132.405 | 37.896 | -1.251 | 9.874  | 0 | 0     | yes | 132.405   | 113.615   | 151.194  | 37.8964   | 29.9406  | 45.8522  |
| ENSG00000114391 | ENSG00000114391 | RPL24         | 3:1013999!        | 67.447  | 19.388 | -1.247 | 7.376  | 0 | 0     | yes | 67.4473   | 54.7954   | 80.0991  | 19.3875   | 13.9355  | 24.8394  |
| ENSG00000164142 | ENSG00000164142 | FAM160A1      | 4:1523303!        | 9.128   | 2.669  | -1.23  | 5.337  | 0 | 0     | yes | 9.12793   | 5.86033   | 12.3955  | 2.66924   | 1.89496  | 3.44351  |
| ENSG00000207165 | ENSG00000207165 | SNORA70       | X:1536183         | 8.619   | 2.53   | -1.226 | 35.845 | 0 | 0     | yes | 8.61949   | 8.24499   | 8.99398  | 2.53028   | 2.39665  | 2.66392  |
| ENSG00000258466 | ENSG00000258466 | RP11-1012A1.4 | 14:680865         | 136.321 | 40.496 | -1.214 | 7.201  | 0 | 0     | yes | 136.321   | 110.615   | 162.027  | 40.4964   | 29.18    | 51.8128  |
| ENSG00000113231 | ENSG00000113231 | PDE8B         | 5:7650627!        | 4.952   | 1.477  | -1.21  | 3.973  | 0 | 0.002 | yes | 4.9521    | 4.02809   | 5.8761   | 1.47688   | 0.620542 | 2.33321  |
| ENSG00000114395 | ENSG00000114395 | CYB561D2      | 3:5038476!        | 80.982  | 24.294 | -1.204 | 13.216 | 0 | 0     | yes | 80.9819   | 73.1584   | 88.8055  | 24.2939   | 20.5407  | 28.0471  |
| ENSG00000129226 | ENSG00000129226 | CD68          | 17:748292         | 8.242   | 2.533  | -1.18  | 6.221  | 0 | 0     | yes | 8.2416    | 6.72076   | 9.76245  | 2.5326    | 1.69313  | 3.37206  |
| ENSG00000160712 | ENSG00000160712 | IL6R          | 1:1543748!        | 17.878  | 5.518  | -1.175 | 4.801  | 0 | 0     | yes | 17.8775   | 13.7502   | 22.0049  | 5.51827   | 3.13531  | 7.90123  |
| ENSG00000162244 | ENSG00000162244 | RPL29         | 3:5202764!        | 49.486  | 15.472 | -1.163 | 8.137  | 0 | 0     | yes | 49.4862   | 41.7862   | 57.1863  | 15.4721   | 11.7634  | 19.1808  |
| ENSG00000106336 | ENSG00000106336 | FBXO24        | 7:1001698!        | 4.809   | 1.507  | -1.161 | 4.025  | 0 | 0.001 | yes | 4.80913   | 3.59566   | 6.02259  | 1.50655   | 0.725321 | 2.28778  |
| ENSG00000011198 | ENSG00000011198 | ABHD5         | 3:4332800!        | 27.323  | 8.643  | -1.151 | 6.328  | 0 | 0     | yes | 27.3233   | 22.2085   | 32.4382  | 8.64344   | 5.9474   | 11.3395  |
| ENSG00000152977 | ENSG00000152977 | ZIC1          | 3:1471038!        | 28.516  | 9.018  | -1.151 | 5.827  | 0 | 0     | yes | 28.5161   | 23.0663   | 33.966   | 9.01805   | 5.89945  | 12.1367  |
| ENSG00000122432 | ENSG00000122432 | SPATA1        | 1:8496400!        | 0.822   | 0.264  | -1.136 | 11.171 | 0 | 0     | yes | 0.821601  | 0.694203  | 0.948998 | 0.26384   | 0.229121 | 0.298559 |
| ENSG00000236939 | ENSG00000236939 | C8orf56       | 8:1041332!        | 0.304   | 0.099  | -1.125 | 29.283 | 0 | 0     | yes | 0.303575  | 0.287111  | 0.32004  | 0.0985945 | 0.093232 | 0.103957 |
| ENSG00000219481 | ENSG00000219481 | NBPF1         | 1:1688881!        | 31.872  | 10.419 | -1.118 | 5.208  | 0 | 0     | yes | 31.8723   | 25.4999   | 38.2447  | 10.4189   | 6.45955  | 14.3783  |
| ENSG00000235897 | ENSG00000235897 | TM4SF19-AS1   | 3:1959383!        | 3.124   | 1.03   | -1.11  | 3.612  | 0 | 0.006 | yes | 3.12377   | 1.3516    | 4.89593  | 1.02989   | 0.786796 | 1.27299  |
| ENSG00000125354 | ENSG00000125354 |               | Sep-06 X:1187496! | 5.614   | 1.864  | -1.102 | 3.542  | 0 | 0.007 | yes | 5.61351   | 2.36065   | 8.86637  | 1.86398   | 1.44002  | 2.28795  |
| ENSG00000184117 | ENSG00000184117 | NIPSNAP1      | 22:299018!        | 190.563 | 63.935 | -1.092 | 16.021 | 0 | 0     | yes | 190.563   | 174.702   | 206.425  | 63.9352   | 57.0317  | 70.8387  |
| ENSG00000234062 | ENSG00000234062 | RP11-308D16.4 | X:1359915!        | 9.97    | 3.347  | -1.092 | 3.751  | 0 | 0.003 | yes | 9.96961   | 7.078     | 12.8612  | 3.34671   | 1.65802  | 5.0354   |
| ENSG00000239775 | ENSG00000239775 | AC017116.11   | 7:4408423         | 32.714  | 11.025 | -1.088 | 6.516  | 0 | 0     | yes | 32.714    | 27.1647   | 38.2632  | 11.0245   | 7.85471  | 14.1942  |
| ENSG00000234264 | ENSG00000234264 | RP4-694A7.4   | 1:6893983!        | 0.092   | 0.031  | -1.082 | 4.15   | 0 | 0.001 | yes | 0.0920689 | 0.0589967 | 0.125141 | 0.031203  | 0.019409 | 0.042997 |
| ENSG00000142937 | ENSG00000142937 | RPS8          | 1:4520548!        | 66.025  | 22.505 | -1.076 | 10.21  | 0 | 0     | yes | 66.0252   | 58.381    | 73.6694  | 22.5046   | 18.5393  | 26.4699  |
| ENSG00000150527 | ENSG00000150527 | CTAGE5        | 14:396994!        | 13.876  | 4.779  | -1.066 | 5.649  | 0 | 0     | yes | 13.8763   | 10.1372   | 17.6155  | 4.77949   | 3.51679  | 6.0422   |
| ENSG00000225505 | ENSG00000225505 | RP11-330C7.3  | 1:9297425!        | 0.138   | 0.048  | -1.064 | 7.43   | 0 | 0     | yes | 0.138479  | 0.110358  | 0.1666   | 0.047778  | 0.038125 | 0.057431 |
| ENSG00000160746 | ENSG00000160746 | ANO10         | 3:4332800!        | 17.335  | 6.007  | -1.06  | 6.147  | 0 | 0     | yes | 17.3353   | 14.1107   | 20.5598  | 6.00739   | 4.2631   | 7.75168  |
| ENSG00000121578 | ENSG00000121578 | B4GALT4       | 3:1189305!        | 69.509  | 24.265 | -1.052 | 8.803  | 0 | 0     | yes | 69.5086   | 61.9101   | 77.1071  | 24.2653   | 19.1056  | 29.4251  |
| ENSG00000249319 | ENSG00000249319 | AC068533.7    | 7:6554078!        | 10.845  | 3.792  | -1.051 | 4.492  | 0 | 0     | yes | 10.8445   | 8.2935    | 13.3955  | 3.79211   | 2.25876  | 5.32547  |
| ENSG00000152061 | ENSG00000152061 | RABGAP1L      | 1:1740844!        | 8.769   | 3.091  | -1.043 | 3.989  | 0 | 0.001 | yes | 8.76911   | 6.00896   | 11.5293  | 3.09108   | 1.80079  | 4.38137  |
| ENSG00000163738 | ENSG00000163738 | MTHFD2L       | 4:7497989!        | 11.308  | 4.023  | -1.033 | 3.733  | 0 | 0.004 | yes | 11.308    | 6.42496   | 16.1911  | 4.0232    | 2.62928  | 5.41712  |
| ENSG00000155016 | ENSG00000155016 | CYP2U1        | 4:1087457!        | 4.016   | 1.431  | -1.032 | 5.303  | 0 | 0     | yes | 4.01553   | 3.20683   | 4.82423  | 1.43109   | 0.954601 | 1.90758  |
| ENSG00000174791 | ENSG00000174791 | RIN1          | 11:660977!        | 5.07    | 1.828  | -1.02  | 3.738  | 0 | 0.004 | yes | 5.07002   | 3.63937   | 6.50068  | 1.82829   | 0.974115 | 2.68246  |
| ENSG00000213865 | ENSG00000213865 | C8orf44       | 8:6757983!        | 0.294   | 0.108  | -1.004 | 4.338  | 0 | 0     | yes | 0.294028  | 0.205624  | 0.382432 | 0.107687  | 0.069756 | 0.145619 |
| ENSG00000234353 | ENSG00000234353 | AP000347.4    | 22:239506!        | 0.295   | 0.108  | -1.004 | 11.603 | 0 | 0     | yes | 0.295413  | 0.259255  | 0.331571 | 0.108219  | 0.094973 | 0.121466 |
| ENSG00000241839 | ENSG00000241839 | PLEKHO2       | 15:651340!        | 3.071   | 1.129  | -1.001 | 4.773  | 0 | 0     | yes | 3.07126   | 2.43069   | 3.71184  | 1.12864   | 0.717873 | 1.5394   |
| ENSG00000105877 | ENSG00000105877 | DNAH11        | 7:2158283!        | 0.458   | 0.168  | -1     | 4.342  | 0 | 0     | yes | 0.458099  | 0.262116  | 0.654082 | 0.168459  | 0.139622 | 0.197296 |

|                 |                 |               |           |         |        |        |        |   |       |     |           |           |           |           |          |          |
|-----------------|-----------------|---------------|-----------|---------|--------|--------|--------|---|-------|-----|-----------|-----------|-----------|-----------|----------|----------|
| ENSG00000115239 | ENSG00000115239 | ASB3          | 2:5375980 | 73.534  | 27.221 | -0.994 | 9.698  | 0 | 0     | yes | 73.5337   | 64.4662   | 82.6011   | 27.2205   | 22.7647  | 31.6762  |
| ENSG00000177868 | ENSG00000177868 | CCDC23        | 1:4327272 | 32.818  | 12.257 | -0.985 | 5.539  | 0 | 0     | yes | 32.8182   | 27.435    | 38.2015   | 12.2568   | 8.38887  | 16.1246  |
| ENSG00000189050 | ENSG00000189050 | RNFT1         | 17:580296 | 34.067  | 12.819 | -0.977 | 7.063  | 0 | 0     | yes | 34.0669   | 28.3491   | 39.7847   | 12.8191   | 9.99843  | 15.6399  |
| ENSG00000242247 | ENSG00000242247 | ARFGAP3       | 22:431925 | 47.362  | 17.83  | -0.977 | 8.888  | 0 | 0     | yes | 47.3617   | 42.2627   | 52.4607   | 17.8298   | 14.4123  | 21.2474  |
| ENSG00000243156 | ENSG00000243156 | MICAL3        | 22:182704 | 33.752  | 12.77  | -0.972 | 8.447  | 0 | 0     | yes | 33.7521   | 30.3464   | 37.1578   | 12.7702   | 10.129   | 15.4113  |
| ENSG00000078018 | ENSG00000078018 | MAP2          | 2:2102887 | 23.359  | 8.927  | -0.962 | 4.273  | 0 | 0     | yes | 23.3591   | 14.8242   | 31.8939   | 8.92686   | 6.57851  | 11.2752  |
| ENSG00000021762 | ENSG00000021762 | OSBPL5        | 11:310834 | 57.331  | 22.34  | -0.942 | 5.93   | 0 | 0     | yes | 57.3312   | 40.989    | 73.6735   | 22.3396   | 19.1981  | 25.481   |
| ENSG00000255526 | ENSG00000255526 | NEDD8-MDP1    | 14:246583 | 35.206  | 13.746 | -0.94  | 5.66   | 0 | 0     | yes | 35.2055   | 28.8239   | 41.587    | 13.7458   | 9.91696  | 17.5746  |
| ENSG00000134508 | ENSG00000134508 | CABLES1       | 18:207145 | 12.879  | 5.088  | -0.929 | 7.597  | 0 | 0     | yes | 12.8791   | 11.1359   | 14.6224   | 5.08767   | 4.05157  | 6.12377  |
| ENSG00000163291 | ENSG00000163291 | PAQR3         | 4:7969749 | 11.53   | 4.62   | -0.914 | 4.21   | 0 | 0.001 | yes | 11.5303   | 9.02432   | 14.0363   | 4.62048   | 2.88224  | 6.35872  |
| ENSG00000077157 | ENSG00000077157 | PPP1R12B      | 1:2023178 | 25.154  | 10.179 | -0.905 | 7.044  | 0 | 0     | yes | 25.1535   | 20.3341   | 29.973    | 10.1785   | 8.43721  | 11.9198  |
| ENSG00000240950 | ENSG00000240950 | RP11-372E1.1  | 3:1425347 | 24.797  | 10.068 | -0.901 | 4.818  | 0 | 0     | yes | 24.7971   | 19.6296   | 29.9645   | 10.0684   | 6.93931  | 13.1975  |
| ENSG00000237765 | ENSG00000237765 | FAM200B       | 4:1560616 | 30.097  | 12.256 | -0.898 | 4.896  | 0 | 0     | yes | 30.0968   | 24.1056   | 36.0879   | 12.2555   | 8.47629  | 16.0348  |
| ENSG00000137710 | ENSG00000137710 | RDX           | 11:110045 | 11.982  | 4.916  | -0.891 | 5.788  | 0 | 0     | yes | 11.9822   | 9.17763   | 14.7869   | 4.91612   | 3.93301  | 5.89922  |
| ENSG00000256500 | ENSG00000256500 | RP11-73M18.2  | 14:104019 | 23.567  | 9.773  | -0.88  | 4.008  | 0 | 0.001 | yes | 23.5674   | 17.954    | 29.1808   | 9.77252   | 6.16566  | 13.3794  |
| ENSG00000172728 | ENSG00000172728 | FUT10         | 8:3322834 | 19.006  | 7.921  | -0.875 | 4.693  | 0 | 0     | yes | 19.0064   | 16.1252   | 21.8876   | 7.9212    | 5.22187  | 10.6205  |
| ENSG00000151466 | ENSG00000151466 | SCLT1         | 4:1297307 | 6.318   | 2.638  | -0.873 | 4.786  | 0 | 0     | yes | 6.31758   | 4.93354   | 7.70163   | 2.63811   | 1.86823  | 3.40798  |
| ENSG00000250644 | ENSG00000250644 | RP11-295K3.1  | 11:175363 | 9.336   | 3.9    | -0.873 | 4.304  | 0 | 0     | yes | 9.33586   | 7.25968   | 11.412    | 3.8998    | 2.57691  | 5.22269  |
| ENSG00000147316 | ENSG00000147316 | MCPH1         | 8:6261071 | 18.902  | 7.909  | -0.871 | 5.343  | 0 | 0     | yes | 18.9015   | 14.7011   | 23.102    | 7.90888   | 6.021    | 9.79676  |
| ENSG00000115661 | ENSG00000115661 | STK16         | 2:2200944 | 72.449  | 30.396 | -0.869 | 8.039  | 0 | 0     | yes | 72.4491   | 64.1438   | 80.7543   | 30.3956   | 24.8279  | 35.9634  |
| ENSG00000229732 | ENSG00000229732 | AC019349.5    | 17:396572 | 40.181  | 16.914 | -0.865 | 4.744  | 0 | 0     | yes | 40.1805   | 31.8857   | 48.4753   | 16.914    | 11.8274  | 22.0005  |
| ENSG00000253966 | ENSG00000253966 | CTC-455F18.3  | 5:1702888 | 0.025   | 0.011  | -0.865 | 8.498  | 0 | 0     | yes | 0.0249819 | 0.0213947 | 0.0285691 | 0.0105177 | 0.009    | 0.012036 |
| ENSG00000257337 | ENSG00000257337 | RP11-983P16.4 | 12:533999 | 42.507  | 17.906 | -0.865 | 6.217  | 0 | 0     | yes | 42.5069   | 35.8447   | 49.169    | 17.9063   | 13.7924  | 22.0202  |
| ENSG00000206535 | ENSG00000206535 | LNP1          | 3:1000822 | 11.374  | 4.802  | -0.862 | 6.164  | 0 | 0     | yes | 11.3736   | 9.59159   | 13.1555   | 4.80248   | 3.68961  | 5.91535  |
| ENSG00000196588 | ENSG00000196588 | MKL1          | 22:408062 | 36.814  | 15.723 | -0.851 | 6.844  | 0 | 0     | yes | 36.8136   | 28.971    | 44.6562   | 15.7227   | 13.7079  | 17.7376  |
| ENSG00000254501 | ENSG00000254501 | AP003068.9    | 11:648516 | 20.54   | 8.779  | -0.85  | 3.835  | 0 | 0.003 | yes | 20.5403   | 15.6408   | 25.4398   | 8.77909   | 5.49899  | 12.0592  |
| ENSG00000253950 | ENSG00000253950 | AC020907.6    | 19:354856 | 25.454  | 10.947 | -0.844 | 4.798  | 0 | 0     | yes | 25.4543   | 20.3079   | 30.6007   | 10.9467   | 7.79538  | 14.0981  |
| ENSG00000079819 | ENSG00000079819 | EPB41L2       | 6:1311604 | 33.855  | 14.76  | -0.83  | 7.579  | 0 | 0     | yes | 33.8549   | 27.4601   | 40.2497   | 14.7603   | 13.1225  | 16.3982  |
| ENSG00000226232 | ENSG00000226232 | RP11-419C5.2  | 16:700101 | 6.899   | 3.025  | -0.824 | 3.508  | 0 | 0.008 | yes | 6.89898   | 5.36178   | 8.43617   | 3.0252    | 1.77341  | 4.27699  |
| ENSG00000088298 | ENSG00000088298 | EDEM2         | 20:337031 | 42.499  | 18.697 | -0.821 | 9.889  | 0 | 0     | yes | 42.4992   | 38.358    | 46.6405   | 18.6974   | 16.1833  | 21.2114  |
| ENSG00000149735 | ENSG00000149735 | GPHA2         | 11:646850 | 0.204   | 0.09   | -0.821 | 5.06   | 0 | 0     | yes | 0.203949  | 0.157148  | 0.25075   | 0.089741  | 0.06915  | 0.110332 |
| ENSG00000128590 | ENSG00000128590 | DNAJB9        | 7:1081108 | 26.773  | 11.815 | -0.818 | 4.961  | 0 | 0     | yes | 26.773    | 21.7392   | 31.8069   | 11.8147   | 8.61355  | 15.0159  |
| ENSG00000218186 | ENSG00000218186 | KRT8P43       | 6:2454433 | 0.028   | 0.012  | -0.817 | 5.018  | 0 | 0     | yes | 0.0276978 | 0.0214255 | 0.0339701 | 0.0122338 | 0.00937  | 0.015098 |
| ENSG00000126522 | ENSG00000126522 | ASL           | 7:6554078 | 263.941 | 116.99 | -0.814 | 4.565  | 0 | 0     | yes | 263.941   | 214.609   | 313.273   | 116.99    | 81.4751  | 152.505  |
| ENSG00000182985 | ENSG00000182985 | CADM1         | 11:115039 | 47.01   | 20.84  | -0.813 | 5.107  | 0 | 0     | yes | 47.0102   | 39.9158   | 54.1045   | 20.8401   | 14.9925  | 26.6877  |
| ENSG00000065518 | ENSG00000065518 | NDUFB4        | 3:1203151 | 129.774 | 57.865 | -0.808 | 5.789  | 0 | 0     | yes | 129.774   | 106.253   | 153.294   | 57.8646   | 45.5881  | 70.1411  |
| ENSG00000227973 | ENSG00000227973 | AC023356.3    | 15:441629 | 0.241   | 0.107  | -0.808 | 7.969  | 0 | 0     | yes | 0.240561  | 0.207749  | 0.273374  | 0.107273  | 0.091192 | 0.123354 |
| ENSG00000102312 | ENSG00000102312 | PORCN         | X:4836734 | 9.944   | 4.466  | -0.8   | 3.775  | 0 | 0.003 | yes | 9.94368   | 6.61131   | 13.2761   | 4.46614   | 3.30567  | 5.62662  |
| ENSG00000149292 | ENSG00000149292 | TTC12         | 11:113185 | 30.663  | 13.801 | -0.798 | 4.815  | 0 | 0     | yes | 30.6628   | 24.3431   | 36.9825   | 13.8007   | 10.216   | 17.3853  |
| ENSG00000134970 | ENSG00000134970 | TMED7         | 5:1149143 | 61.338  | 27.638 | -0.797 | 7.116  | 0 | 0     | yes | 61.3384   | 53.0469   | 69.6298   | 27.6379   | 22.6992  | 32.5765  |
| ENSG00000117523 | ENSG00000117523 | PRRC2C        | 1:1714546 | 82.301  | 37.201 | -0.794 | 4.203  | 0 | 0.001 | yes | 82.3005   | 55.2907   | 109.31    | 37.2005   | 30.2321  | 44.1689  |
| ENSG00000168291 | ENSG00000168291 | PDHB          | 3:5841335 | 67.141  | 30.373 | -0.793 | 6.099  | 0 | 0     | yes | 67.1413   | 56.4923   | 77.7903   | 30.3732   | 24.1114  | 36.635   |
| ENSG00000145868 | ENSG00000145868 | FBXO38        | 5:1477634 | 54.428  | 24.695 | -0.79  | 4.684  | 0 | 0     | yes | 54.4277   | 40.3181   | 68.5373   | 24.6948   | 19.3618  | 30.0278  |
| ENSG00000123104 | ENSG00000123104 | ITPR2         | 12:262729 | 15.403  | 7.01   | -0.787 | 3.977  | 0 | 0.001 | yes | 15.4026   | 11.6235   | 19.1817   | 7.0101    | 4.83249  | 9.18771  |
| ENSG00000137817 | ENSG00000137817 | PARP6         | 15:724913 | 72.619  | 33.221 | -0.782 | 12.242 | 0 | 0     | yes | 72.619    | 67.0182   | 78.2198   | 33.2205   | 29.8367  | 36.6043  |
| ENSG00000232940 | ENSG00000232940 | HCG25         | 6:3321731 | 33.532  | 15.364 | -0.78  | 4.148  | 0 | 0.001 | yes | 33.5318   | 26.4102   | 40.6534   | 15.3643   | 10.591   | 20.1376  |
| ENSG00000255046 | ENSG00000255046 | RP11-297N6.4  | 8:1165308 | 0.098   | 0.045  | -0.777 | 24.962 | 0 | 0     | yes | 0.0980361 | 0.0937544 | 0.102318  | 0.0450745 | 0.043075 | 0.047074 |
| ENSG00000138382 | ENSG00000138382 | METTL5        | 2:1706484 | 144.29  | 66.389 | -0.776 | 4.166  | 0 | 0.001 | yes | 144.29    | 114.74    | 173.84    | 66.3891   | 45.7192  | 87.059   |
| ENSG00000165238 | ENSG00000165238 | WNK2          | 9:9594719 | 25.71   | 11.83  | -0.776 | 7.505  | 0 | 0     | yes | 25.7101   | 21.3679   | 30.0523   | 11.83     | 10.4169  | 13.2431  |
| ENSG00000256029 | ENSG00000256029 | RP11-190A12.7 | 1:1597965 | 0.283   | 0.131  | -0.775 | 3.843  | 0 | 0.002 | yes | 0.283478  | 0.198006  | 0.36895   | 0.130662  | 0.095708 | 0.165616 |

|                 |                 |               |           |         |         |        |        |   |       |     |           |           |           |           |          |          |
|-----------------|-----------------|---------------|-----------|---------|---------|--------|--------|---|-------|-----|-----------|-----------|-----------|-----------|----------|----------|
| ENSG0000020577  | ENSG0000020577  | SAMD4A        | 14:550338 | 12.035  | 5.591   | -0.767 | 3.713  | 0 | 0.004 | yes | 12.035    | 8.27043   | 15.7995   | 5.59066   | 4.08335  | 7.09796  |
| ENSG00000157657 | ENSG00000157657 | ZNF618        | 9:1166385 | 46.468  | 21.628  | -0.765 | 8.221  | 0 | 0     | yes | 46.4675   | 41.8119   | 51.1232   | 21.6281   | 18.2372  | 25.019   |
| ENSG00000147813 | ENSG00000147813 | NAPRT1        | 8:1446556 | 34.856  | 16.358  | -0.757 | 4.502  | 0 | 0     | yes | 34.8555   | 29.0234   | 40.6876   | 16.3578   | 11.5905  | 21.1251  |
| ENSG00000117983 | ENSG00000117983 | MUC5B         | 11:124429 | 55.709  | 26.33   | -0.749 | 5.488  | 0 | 0     | yes | 55.7088   | 47.2644   | 64.1532   | 26.3304   | 20.3494  | 32.3115  |
| ENSG00000137642 | ENSG00000137642 | SORL1         | 11:121318 | 18.52   | 8.774   | -0.747 | 4.179  | 0 | 0.001 | yes | 18.5196   | 14.9394   | 22.0999   | 8.77364   | 6.13507  | 11.4122  |
| ENSG00000256762 | ENSG00000256762 | STH           | 17:439717 | 0.052   | 0.025   | -0.742 | 16.628 | 0 | 0     | yes | 0.0520904 | 0.0489898 | 0.0551909 | 0.0248001 | 0.02315  | 0.02645  |
| ENSG00000240224 | ENSG00000240224 | UGT1A5        | 2:2345262 | 8.098   | 3.874   | -0.737 | 5.01   | 0 | 0     | yes | 8.09768   | 6.64731   | 9.54804   | 3.87448   | 2.96985  | 4.77911  |
| ENSG00000168000 | ENSG00000168000 | BSC12         | 11:624577 | 366.222 | 175.794 | -0.734 | 3.572  | 0 | 0.007 | yes | 366.222   | 276.746   | 455.698   | 175.794   | 117.714  | 233.873  |
| ENSG00000134333 | ENSG00000134333 | LDHA          | 11:184159 | 196.046 | 94.509  | -0.73  | 9.51   | 0 | 0     | yes | 196.046   | 175.376   | 216.716   | 94.5092   | 83.9722  | 105.046  |
| ENSG00000198301 | ENSG00000198301 | SDAD1         | 4:7683180 | 37.783  | 18.36   | -0.722 | 5.61   | 0 | 0     | yes | 37.7827   | 31.5638   | 44.0015   | 18.3596   | 14.7284  | 21.9907  |
| ENSG00000197728 | ENSG00000197728 | RPS26         | 12:564356 | 118.735 | 57.726  | -0.721 | 7.453  | 0 | 0     | yes | 118.735   | 104.007   | 133.464   | 57.7255   | 49.151   | 66.3     |
| ENSG00000128335 | ENSG00000128335 | APOL2         | 22:366222 | 56.205  | 27.497  | -0.715 | 8.027  | 0 | 0     | yes | 56.205    | 49.4869   | 62.9232   | 27.4969   | 23.8657  | 31.1282  |
| ENSG00000235109 | ENSG00000235109 | ZNF323        | 6:2829246 | 13.809  | 6.798   | -0.709 | 3.829  | 0 | 0.003 | yes | 13.8088   | 10.4076   | 17.21     | 6.79829   | 4.92005  | 8.67653  |
| ENSG00000114942 | ENSG00000114942 | EEF1B2        | 2:2069802 | 40.934  | 20.315  | -0.701 | 5.434  | 0 | 0     | yes | 40.9341   | 35.0871   | 46.7812   | 20.3152   | 15.9543  | 24.676   |
| ENSG00000174374 | ENSG00000174374 | WBSCR16       | 7:7444122 | 43.123  | 21.396  | -0.701 | 7.22   | 0 | 0     | yes | 43.1233   | 37.2765   | 48.9702   | 21.3963   | 18.4233  | 24.3693  |
| ENSG00000137843 | ENSG00000137843 | PAK6          | 15:404532 | 15.432  | 7.663   | -0.7   | 8.242  | 0 | 0     | yes | 15.4321   | 13.7759   | 17.0883   | 7.66311   | 6.65416  | 8.67205  |
| ENSG00000183020 | ENSG00000183020 | AP2A2         | 11:924893 | 137.772 | 68.483  | -0.699 | 5.89   | 0 | 0     | yes | 137.772   | 117.834   | 157.709   | 68.4833   | 55.5994  | 81.3673  |
| ENSG00000135631 | ENSG00000135631 | RAB11FIP5     | 2:7316916 | 46.407  | 23.085  | -0.698 | 5.699  | 0 | 0     | yes | 46.407    | 39.6275   | 53.1865   | 23.0848   | 18.5426  | 27.6269  |
| ENSG00000240854 | ENSG00000240854 | RP11-64K7.1   | 3:1312523 | 23.913  | 11.941  | -0.694 | 5.433  | 0 | 0     | yes | 23.9132   | 20.1397   | 27.6867   | 11.9411   | 9.53919  | 14.343   |
| ENSG00000235706 | ENSG00000235706 | AL356017.3    | 14:955525 | 29.299  | 14.753  | -0.686 | 5.374  | 0 | 0     | yes | 29.2988   | 24.955    | 33.6426   | 14.753    | 11.6859  | 17.8202  |
| ENSG00000135916 | ENSG00000135916 | ITM2C         | 2:2317293 | 328.54  | 165.694 | -0.685 | 12.053 | 0 | 0     | yes | 328.54    | 302.852   | 354.228   | 165.694   | 152.043  | 179.345  |
| ENSG00000162458 | ENSG00000162458 | FBLIM1        | 1:1608310 | 30.319  | 15.277  | -0.685 | 3.977  | 0 | 0.001 | yes | 30.3193   | 24.0781   | 36.5606   | 15.2767   | 11.0522  | 19.5012  |
| ENSG00000110011 | ENSG00000110011 | DNAJC4        | 11:639741 | 108.793 | 54.918  | -0.684 | 5.313  | 0 | 0     | yes | 108.793   | 91.723    | 125.863   | 54.918    | 43.7166  | 66.1195  |
| ENSG00000213782 | ENSG00000213782 | DDX47         | 12:128788 | 16.731  | 8.495   | -0.678 | 4.039  | 0 | 0.001 | yes | 16.7307   | 13.7323   | 19.7291   | 8.49533   | 6.08517  | 10.9055  |
| ENSG00000111252 | ENSG00000111252 | SH2B3         | 12:111843 | 5.86    | 2.977   | -0.677 | 4.168  | 0 | 0.001 | yes | 5.85959   | 4.76303   | 6.95615   | 2.97743   | 2.18691  | 3.76795  |
| ENSG00000145907 | ENSG00000145907 | G3BP1         | 5:1511218 | 131.669 | 66.97   | -0.676 | 9.263  | 0 | 0     | yes | 131.669   | 118.018   | 145.321   | 66.9697   | 60.0886  | 73.8509  |
| ENSG00000154146 | ENSG00000154146 | NRGN          | 11:124609 | 12.139  | 6.193   | -0.673 | 4.219  | 0 | 0.001 | yes | 12.1385   | 9.84958   | 14.4275   | 6.19281   | 4.59898  | 7.78664  |
| ENSG00000203896 | ENSG00000203896 | LIME1         | 20:622891 | 32.328  | 16.504  | -0.672 | 3.585  | 0 | 0.006 | yes | 32.3283   | 25.6996   | 38.957    | 16.5039   | 11.3208  | 21.6869  |
| ENSG00000240682 | ENSG00000240682 | ISY1          | 3:1288064 | 35.619  | 18.347  | -0.663 | 5.798  | 0 | 0     | yes | 35.6186   | 30.7083   | 40.5289   | 18.3466   | 14.9951  | 21.698   |
| ENSG00000196670 | ENSG00000196670 | ZFP62         | 5:1802746 | 39.378  | 20.306  | -0.662 | 4.73   | 0 | 0     | yes | 39.3775   | 29.8669   | 48.8881   | 20.3057   | 17.427   | 23.1844  |
| ENSG00000166278 | ENSG00000166278 | C2            | 6:3186556 | 17.216  | 8.91    | -0.659 | 3.626  | 0 | 0.005 | yes | 17.2157   | 13.1051   | 21.3263   | 8.91032   | 6.47046  | 11.3502  |
| ENSG00000127080 | ENSG00000127080 | IPPK          | 9:9505963 | 13.269  | 6.95    | -0.647 | 4.477  | 0 | 0     | yes | 13.2687   | 10.9993   | 15.5381   | 6.94975   | 5.33152  | 8.56799  |
| ENSG00000162441 | ENSG00000162441 | LZIC          | 1:9982170 | 19.174  | 10.087  | -0.642 | 4.075  | 0 | 0.001 | yes | 19.174    | 15.4925   | 22.8556   | 10.0873   | 7.56541  | 12.6092  |
| ENSG00000121671 | ENSG00000121671 | CRY2          | 11:458686 | 69.161  | 36.72   | -0.633 | 3.758  | 0 | 0.003 | yes | 69.1606   | 60.1812   | 78.1401   | 36.7203   | 25.3045  | 48.1361  |
| ENSG00000138297 | ENSG00000138297 | TIMM23        | 10:513713 | 25.333  | 13.529  | -0.627 | 4.172  | 0 | 0.001 | yes | 25.3326   | 20.6548   | 30.0105   | 13.5291   | 10.3183  | 16.7399  |
| ENSG00000170860 | ENSG00000170860 | LSM3          | 3:1418631 | 4.716   | 2.526   | -0.624 | 4.315  | 0 | 0     | yes | 4.71642   | 3.86692   | 5.56592   | 2.52631   | 1.95429  | 3.09834  |
| ENSG00000247372 | ENSG00000247372 | CTD-2235C13.2 | 5:7461597 | 0.264   | 0.142   | -0.622 | 15.035 | 0 | 0     | yes | 0.264334  | 0.248977  | 0.279692  | 0.141961  | 0.133607 | 0.150315 |
| ENSG00000119414 | ENSG00000119414 | PPP6C         | 9:1279088 | 76.461  | 41.321  | -0.615 | 6.752  | 0 | 0     | yes | 76.4609   | 67.8622   | 85.0595   | 41.3211   | 35.3924  | 47.2497  |
| ENSG00000215450 | ENSG00000215450 | RP5-890O15.3  | 20:455232 | 0.107   | 0.058   | -0.614 | 9.131  | 0 | 0     | yes | 0.106832  | 0.0967372 | 0.116926  | 0.0578419 | 0.052314 | 0.06337  |
| ENSG00000010322 | ENSG00000010322 | NISCH         | 3:5248913 | 76.101  | 41.229  | -0.613 | 6.052  | 0 | 0     | yes | 76.1005   | 64.0777   | 88.1233   | 41.2285   | 36.0016  | 46.4555  |
| ENSG00000137522 | ENSG00000137522 | RNF121        | 11:716397 | 79.681  | 43.236  | -0.611 | 5.176  | 0 | 0     | yes | 79.6811   | 65.6259   | 93.7362   | 43.2364   | 36.4428  | 50.0299  |
| ENSG00000142330 | ENSG00000142330 | CAPN10        | 2:2415261 | 15.714  | 8.528   | -0.611 | 4.164  | 0 | 0.001 | yes | 15.7135   | 12.5463   | 18.8808   | 8.52774   | 6.70738  | 10.3481  |
| ENSG00000100442 | ENSG00000100442 | FKBP3         | 14:455533 | 42.53   | 23.128  | -0.609 | 5.307  | 0 | 0     | yes | 42.5304   | 36.4306   | 48.6302   | 23.1282   | 18.982   | 27.2745  |
| ENSG00000131508 | ENSG00000131508 | UBE2D2        | 5:1389060 | 191.105 | 104.488 | -0.604 | 4.378  | 0 | 0     | yes | 191.105   | 161.545   | 220.666   | 104.488   | 80.628   | 128.347  |
| ENSG00000072201 | ENSG00000072201 | LNX1          | 4:5424380 | 17.546  | 9.603   | -0.603 | 3.991  | 0 | 0.001 | yes | 17.5458   | 14.7783   | 20.3133   | 9.60287   | 7.12942  | 12.0763  |
| ENSG00000123388 | ENSG00000123388 | HOXC11        | 12:543560 | 11.539  | 6.33    | -0.6   | 4.574  | 0 | 0     | yes | 11.5387   | 9.62472   | 13.4526   | 6.33033   | 5.04235  | 7.61831  |
| ENSG00000145592 | ENSG00000145592 | RPL37         | 5:4082536 | 459.234 | 253.026 | -0.596 | 7.967  | 0 | 0     | yes | 459.234   | 416.473   | 501.995   | 253.026   | 223.389  | 282.663  |
| ENSG00000178922 | ENSG00000178922 | HYI           | 1:4388642 | 106.079 | 58.461  | -0.596 | 7.217  | 0 | 0     | yes | 106.079   | 95.7307   | 116.427   | 58.4612   | 50.6727  | 66.2497  |
| ENSG00000182909 | ENSG00000182909 | LENG9         | 19:549559 | 16.957  | 9.394   | -0.591 | 4.845  | 0 | 0     | yes | 16.9574   | 14.3509   | 19.5639   | 9.39438   | 7.61674  | 11.172   |
| ENSG00000120159 | ENSG00000120159 | C9orf82       | 9:2684068 | 33.889  | 18.823  | -0.588 | 4.777  | 0 | 0     | yes | 33.889    | 27.8673   | 39.9106   | 18.823    | 15.6153  | 22.0308  |

|                 |                 |            |            |         |         |        |        |   |       |     |            |            |            |             |          |          |
|-----------------|-----------------|------------|------------|---------|---------|--------|--------|---|-------|-----|------------|------------|------------|-------------|----------|----------|
| ENSG00000136383 | ENSG00000136383 | ALPK3      | 15:853599  | 1.21    | 0.675   | -0.584 | 3.731  | 0 | 0.004 | yes | 1.21035    | 0.973055   | 1.44765    | 0.674759    | 0.509924 | 0.839595 |
| ENSG00000170421 | ENSG00000170421 | KRT8       | 12:532909  | 1083.56 | 606.012 | -0.581 | 11.237 | 0 | 0     | yes | 1083.56    | 999.646    | 1167.47    | 606.012     | 564.468  | 647.557  |
| ENSG00000141027 | ENSG00000141027 | NCOR1      | 17:158798  | 114.845 | 64.88   | -0.571 | 4.648  | 0 | 0     | yes | 114.845    | 97.4441    | 132.245    | 64.8796     | 52.3291  | 77.4301  |
| ENSG00000176973 | ENSG00000176973 | FAM89B     | 11:653379  | 44.388  | 25.134  | -0.569 | 6.515  | 0 | 0     | yes | 44.3884    | 39.3996    | 49.3772    | 25.1342     | 21.7761  | 28.4922  |
| ENSG00000189269 | ENSG00000189269 | C22orf43   | 22:239506  | 0.063   | 0.036   | -0.567 | 6.552  | 0 | 0     | yes | 0.0627378  | 0.0550588  | 0.0704168  | 0.0355846   | 0.031229 | 0.03994  |
| ENSG00000167491 | ENSG00000167491 | GATAD2A    | 19:194966  | 205.321 | 116.725 | -0.565 | 9.523  | 0 | 0     | yes | 205.321    | 189.148    | 221.493    | 116.725     | 106.375  | 127.075  |
| ENSG00000198211 | ENSG00000198211 | TUBB3      | 16:899785  | 22.568  | 12.828  | -0.565 | 4.053  | 0 | 0.001 | yes | 22.5679    | 19.2008    | 25.9349    | 12.8277     | 9.80658  | 15.8488  |
| ENSG00000089101 | ENSG00000089101 | C20orf26   | 20:200150  | 0.001   | 0.001   | -0.555 | 8.176  | 0 | 0     | yes | 0.00112768 | 0.00101394 | 0.00124141 | 0.000647319 | 0.000588 | 0.000706 |
| ENSG00000179222 | ENSG00000179222 | MAGED1     | X:5154610  | 356.326 | 205.229 | -0.552 | 10.915 | 0 | 0     | yes | 356.326    | 332.425    | 380.226    | 205.229     | 189.706  | 220.753  |
| ENSG00000113621 | ENSG00000113621 | TXNDC15    | 5:1342094  | 59.404  | 34.387  | -0.547 | 4.207  | 0 | 0.001 | yes | 59.4043    | 48.1194    | 70.6891    | 34.387      | 28.2887  | 40.4854  |
| ENSG00000116874 | ENSG00000116874 | WARS2      | 1:1195738  | 20.727  | 12.033  | -0.544 | 3.619  | 0 | 0.006 | yes | 20.7272    | 17.1533    | 24.3011    | 12.0333     | 9.0721   | 14.9945  |
| ENSG00000138641 | ENSG00000138641 | HERC3      | 4:8944213  | 50.005  | 29.053  | -0.543 | 5.081  | 0 | 0     | yes | 50.0048    | 43.5811    | 56.4286    | 29.0532     | 24.0905  | 34.016   |
| ENSG00000197958 | ENSG00000197958 | RPL12      | 9:1302099  | 357.263 | 207.537 | -0.543 | 8.24   | 0 | 0     | yes | 357.263    | 326.414    | 388.113    | 207.537     | 186.861  | 228.214  |
| ENSG00000005022 | ENSG00000005022 | SLC25A5    | X:1185999  | 330.8   | 193.511 | -0.536 | 8.68   | 0 | 0     | yes | 330.8      | 303.554    | 358.047    | 193.511     | 175.692  | 211.331  |
| ENSG00000077782 | ENSG00000077782 | FGFR1      | 8:3826865  | 56.541  | 33.196  | -0.533 | 3.6    | 0 | 0.006 | yes | 56.5408    | 46.1743    | 66.9073    | 33.1957     | 25.4893  | 40.9021  |
| ENSG00000232485 | ENSG00000232485 | AC098820.3 | 2:2172500  | 0.184   | 0.108   | -0.532 | 15.394 | 0 | 0     | yes | 0.184203   | 0.175903   | 0.192503   | 0.108248    | 0.102582 | 0.113914 |
| ENSG00000159884 | ENSG00000159884 | CCDC107    | 9:3565830  | 22.05   | 13.013  | -0.527 | 3.873  | 0 | 0.002 | yes | 22.0496    | 18.4832    | 25.6159    | 13.0132     | 10.1626  | 15.8638  |
| ENSG00000137055 | ENSG00000137055 | PLAA       | 9:2690408  | 17.238  | 10.19   | -0.526 | 3.557  | 0 | 0.007 | yes | 17.2379    | 14.2892    | 20.1867    | 10.1904     | 7.73425  | 12.6466  |
| ENSG00000155508 | ENSG00000155508 | CNOT8      | 5:1541980  | 138.936 | 82.111  | -0.526 | 8.452  | 0 | 0     | yes | 138.936    | 127.891    | 149.982    | 82.1108     | 74.249   | 89.9726  |
| ENSG00000184182 | ENSG00000184182 | UBE2F      | 2:2388754  | 59.871  | 35.411  | -0.525 | 5.191  | 0 | 0     | yes | 59.8713    | 52.1328    | 67.6097    | 35.4114     | 29.8992  | 40.9237  |
| ENSG00000229212 | ENSG00000229212 | AC044860.3 | 15:857471  | 0.004   | 0.003   | -0.525 | 10.675 | 0 | 0     | yes | 0.00449926 | 0.00420418 | 0.00479434 | 0.0026614   | 0.002466 | 0.002857 |
| ENSG00000151491 | ENSG00000151491 | EPS8       | 12:157730  | 95.135  | 56.376  | -0.523 | 4.094  | 0 | 0.001 | yes | 95.1348    | 74.5608    | 115.709    | 56.3759     | 48.6933  | 64.0585  |
| ENSG00000139154 | ENSG00000139154 | AEBP2      | 12:195569  | 29.591  | 17.561  | -0.522 | 4.833  | 0 | 0     | yes | 29.5905    | 25.5014    | 33.6797    | 17.5614     | 14.6476  | 20.4753  |
| ENSG00000161980 | ENSG00000161980 | POLR3K     | 16:96406-1 | 52.566  | 31.195  | -0.522 | 5.496  | 0 | 0     | yes | 52.5655    | 46.1634    | 58.9676    | 31.1952     | 26.6512  | 35.7393  |
| ENSG00000168724 | ENSG00000168724 | DNAJC21    | 5:3492969  | 19.737  | 11.709  | -0.522 | 4.987  | 0 | 0     | yes | 19.7372    | 17.0731    | 22.4013    | 11.7089     | 9.83445  | 13.5833  |
| ENSG00000152464 | ENSG00000152464 | RPP38      | 10:151373  | 26.531  | 15.798  | -0.518 | 4.383  | 0 | 0     | yes | 26.5307    | 22.7236    | 30.3379    | 15.7979     | 12.8264  | 18.7693  |
| ENSG00000185885 | ENSG00000185885 | IFITM1     | 11:307630  | 70.098  | 41.771  | -0.518 | 5.159  | 0 | 0     | yes | 70.0979    | 61.9707    | 78.2252    | 41.7712     | 34.9283  | 48.6141  |
| ENSG00000162623 | ENSG00000162623 | TYW3       | 1:7501808  | 23.637  | 14.127  | -0.515 | 4.788  | 0 | 0     | yes | 23.6371    | 20.7728    | 26.5013    | 14.127      | 11.6176  | 16.6363  |
| ENSG00000142669 | ENSG00000142669 | SH3BGRL3   | 1:2660566  | 122.208 | 73.079  | -0.514 | 6.065  | 0 | 0     | yes | 122.208    | 108.356    | 136.061    | 73.0789     | 63.863   | 82.2949  |
| ENSG00000240053 | ENSG00000240053 | LY6G5B     | 6:3162900  | 32.205  | 19.265  | -0.514 | 4.898  | 0 | 0     | yes | 32.2051    | 28.5024    | 35.9078    | 19.2654     | 15.8847  | 22.646   |
| ENSG00000006740 | ENSG00000006740 | ARHGAP44   | 17:126928  | 7.363   | 4.407   | -0.513 | 4.859  | 0 | 0     | yes | 7.36255    | 6.39       | 8.3351     | 4.40662     | 3.68     | 5.13324  |
| ENSG00000161960 | ENSG00000161960 | EIF4A1     | 17:747602  | 178.636 | 107.233 | -0.51  | 8.016  | 0 | 0     | yes | 178.636    | 163.497    | 193.775    | 107.233     | 97.0433  | 117.424  |
| ENSG00000072210 | ENSG00000072210 | ALDH3A2    | 17:195514  | 97.54   | 58.642  | -0.509 | 4.127  | 0 | 0.001 | yes | 97.5401    | 86.9337    | 108.146    | 58.6421     | 45.663   | 71.6211  |
| ENSG00000172113 | ENSG00000172113 | NME6       | 3:4828258  | 38.907  | 23.401  | -0.508 | 3.993  | 0 | 0.001 | yes | 38.9072    | 33.3797    | 44.4346    | 23.4005     | 18.4543  | 28.3468  |
| ENSG00000041802 | ENSG00000041802 | LSG1       | 3:1943047  | 93.899  | 56.712  | -0.504 | 6.684  | 0 | 0     | yes | 93.8991    | 85.2387    | 102.56     | 56.7123     | 49.9406  | 63.4841  |
| ENSG00000172954 | ENSG00000172954 | LCLAT1     | 2:3067009  | 34.498  | 20.832  | -0.504 | 3.924  | 0 | 0.002 | yes | 34.4976    | 28.4521    | 40.543     | 20.8318     | 16.9139  | 24.7497  |
| ENSG00000065923 | ENSG00000065923 | SLC9A7     | X:4646475  | 44.675  | 27.051  | -0.502 | 3.855  | 0 | 0.002 | yes | 44.6746    | 37.061     | 52.2883    | 27.0512     | 21.7291  | 32.3733  |
| ENSG00000133316 | ENSG00000133316 | WDR74      | 11:625997  | 92.857  | 56.363  | -0.499 | 6.023  | 0 | 0     | yes | 92.8569    | 81.7185    | 103.995    | 56.3631     | 49.9142  | 62.812   |
| ENSG00000165675 | ENSG00000165675 | ENOX2      | X:1297517  | 23.799  | 14.462  | -0.498 | 3.819  | 0 | 0.003 | yes | 23.7985    | 19.8974    | 27.6997    | 14.4619     | 11.5273  | 17.3965  |
| ENSG00000196357 | ENSG00000196357 | ZNF565     | 19:366731  | 13.697  | 8.339   | -0.496 | 4.302  | 0 | 0     | yes | 13.6967    | 11.7113    | 15.6821    | 8.33937     | 6.84285  | 9.83589  |
| ENSG00000134825 | ENSG00000134825 | C11orf10   | 11:614479  | 110.991 | 67.689  | -0.495 | 4.546  | 0 | 0     | yes | 110.991    | 96.1714    | 125.81     | 67.6885     | 56.0616  | 79.3154  |
| ENSG00000181163 | ENSG00000181163 | NPM1       | 5:1708141  | 1023.6  | 623.678 | -0.495 | 6.049  | 0 | 0     | yes | 1023.6     | 918.371    | 1128.83    | 623.678     | 544.146  | 703.211  |
| ENSG00000224660 | ENSG00000224660 | AC087590.3 | 3:1529569  | 28.742  | 17.525  | -0.495 | 3.599  | 0 | 0.006 | yes | 28.7422    | 23.8807    | 33.6038    | 17.5246     | 13.7254  | 21.3238  |
| ENSG00000182944 | ENSG00000182944 | EWSR1      | 22:296558  | 133.792 | 82.072  | -0.489 | 8.489  | 0 | 0     | yes | 133.792    | 123.355    | 144.228    | 82.0717     | 75.1216  | 89.0218  |
| ENSG00000131469 | ENSG00000131469 | RPL27      | 17:411504  | 294.74  | 181.163 | -0.487 | 5.386  | 0 | 0     | yes | 294.74     | 259.861    | 329.619    | 181.163     | 156.418  | 205.909  |
| ENSG00000108298 | ENSG00000108298 | RPL19      | 17:373565  | 151.998 | 93.909  | -0.482 | 5.335  | 0 | 0     | yes | 151.998    | 134.015    | 169.98     | 93.9094     | 81.1033  | 106.716  |
| ENSG00000106682 | ENSG00000106682 | EIF4H      | 7:7358857  | 47.145  | 29.349  | -0.474 | 3.743  | 0 | 0.004 | yes | 47.1453    | 39.3327    | 54.9579    | 29.3491     | 23.7295  | 34.9686  |
| ENSG00000171346 | ENSG00000171346 | KRT15      | 17:396699  | 22.433  | 13.998  | -0.472 | 4.376  | 0 | 0     | yes | 22.4334    | 19.3828    | 25.484     | 13.9976     | 11.6566  | 16.3387  |
| ENSG00000124444 | ENSG00000124444 | ZNF576     | 19:441005  | 34.292  | 21.454  | -0.469 | 3.972  | 0 | 0.002 | yes | 34.292     | 29.1044    | 39.4797    | 21.4543     | 17.5633  | 25.3453  |
| ENSG00000126217 | ENSG00000126217 | MCF2L      | 13:113548  | 54.66   | 34.201  | -0.469 | 4.564  | 0 | 0     | yes | 54.66      | 48.5819    | 60.7381    | 34.2009     | 28.2911  | 40.1107  |

|                 |                 |               |           |         |         |        |        |   |           |          |          |          |          |          |          |
|-----------------|-----------------|---------------|-----------|---------|---------|--------|--------|---|-----------|----------|----------|----------|----------|----------|----------|
| ENSG00000161800 | ENSG00000161800 | RACGAP1       | 12:503609 | 42.455  | 26.576  | -0.468 | 4.348  | 0 | 0 yes     | 42.4553  | 36.3109  | 48.5998  | 26.5762  | 22.334   | 30.8184  |
| ENSG00000168575 | ENSG00000168575 | SLC20A2       | 8:4227399 | 53.668  | 33.638  | -0.467 | 4.831  | 0 | 0 yes     | 53.6684  | 46.9611  | 60.3757  | 33.6377  | 28.6733  | 38.6021  |
| ENSG00000206053 | ENSG00000206053 | HN1L          | 16:166233 | 232.065 | 145.737 | -0.465 | 8.927  | 0 | 0 yes     | 232.065  | 215.991  | 248.139  | 145.737  | 134.387  | 157.086  |
| ENSG00000122778 | ENSG00000122778 | KIAA1549      | 7:1383910 | 6.317   | 3.971   | -0.464 | 4.714  | 0 | 0 yes     | 6.31745  | 5.32008  | 7.31481  | 3.97111  | 3.50332  | 4.43891  |
| ENSG00000099901 | ENSG00000099901 | RANBP1        | 22:200677 | 36.658  | 23.09   | -0.462 | 4.349  | 0 | 0 yes     | 36.6578  | 31.4239  | 41.8916  | 23.0904  | 19.4541  | 26.7267  |
| ENSG00000095139 | ENSG00000095139 | ARCN1         | 11:118307 | 173.509 | 109.376 | -0.461 | 9.529  | 0 | 0 yes     | 173.509  | 163.244  | 183.774  | 109.376  | 100.989  | 117.764  |
| ENSG00000132394 | ENSG00000132394 | EEFSEC        | 3:1277704 | 32.783  | 20.744  | -0.458 | 4.51   | 0 | 0 yes     | 32.7825  | 28.597   | 36.968   | 20.7436  | 17.4709  | 24.0164  |
| ENSG00000139163 | ENSG00000139163 | ETNK1         | 12:227780 | 21.062  | 13.349  | -0.456 | 3.761  | 0 | 0.003 yes | 21.0621  | 17.3744  | 24.7498  | 13.3485  | 11.1086  | 15.5884  |
| ENSG00000171853 | ENSG00000171853 | TTC15         | 2:3383445 | 180.861 | 114.746 | -0.455 | 6.348  | 0 | 0 yes     | 180.861  | 160.79   | 200.932  | 114.746  | 104.332  | 125.16   |
| ENSG00000055609 | ENSG00000055609 | MLL3          | 7:1518320 | 14.2    | 9.018   | -0.454 | 3.629  | 0 | 0.005 yes | 14.1995  | 11.8148  | 16.5841  | 9.01792  | 7.34531  | 10.6905  |
| ENSG00000090006 | ENSG00000090006 | LTBP4         | 19:410990 | 66.974  | 42.571  | -0.453 | 8.452  | 0 | 0 yes     | 66.9739  | 61.9162  | 72.0316  | 42.5709  | 39.3304  | 45.8114  |
| ENSG00000089022 | ENSG00000089022 | MAPKAPK5      | 12:112277 | 37.663  | 24.044  | -0.449 | 4.654  | 0 | 0 yes     | 37.663   | 33.7491  | 41.5768  | 24.0443  | 20.1378  | 27.9508  |
| ENSG00000163900 | ENSG00000163900 | TMEM41A       | 3:1850007 | 13.435  | 8.576   | -0.449 | 3.498  | 0 | 0.008 yes | 13.4352  | 10.9937  | 15.8767  | 8.57573  | 7.02097  | 10.1305  |
| ENSG00000241279 | ENSG00000241279 | AC110615.1    | 4:7678101 | 98.509  | 62.87   | -0.449 | 3.875  | 0 | 0.002 yes | 98.5093  | 83.7164  | 113.302  | 62.8698  | 51.7683  | 73.9713  |
| ENSG00000250012 | ENSG00000250012 | RP11-124N2.1  | 3:1257251 | 0.193   | 0.123   | -0.448 | 6.414  | 0 | 0 yes     | 0.192771 | 0.174328 | 0.211214 | 0.123123 | 0.110573 | 0.135673 |
| ENSG00000168066 | ENSG00000168066 | SF1           | 11:645320 | 584.34  | 373.814 | -0.447 | 11.516 | 0 | 0 yes     | 584.34   | 554.071  | 614.61   | 373.814  | 352.223  | 395.404  |
| ENSG00000110171 | ENSG00000110171 | TRIM3         | 11:646984 | 127.786 | 81.948  | -0.444 | 5.475  | 0 | 0 yes     | 127.786  | 112.926  | 142.647  | 81.9475  | 72.669   | 91.226   |
| ENSG00000075292 | ENSG00000075292 | ZNF638        | 2:7150369 | 114.804 | 73.746  | -0.443 | 6.325  | 0 | 0 yes     | 114.804  | 103.888  | 125.72   | 73.7459  | 66.1724  | 81.3193  |
| ENSG00000134759 | ENSG00000134759 | ELP2          | 18:337094 | 67.406  | 43.318  | -0.442 | 4.744  | 0 | 0 yes     | 67.4061  | 59.0699  | 75.7422  | 43.3181  | 37.2755  | 49.3607  |
| ENSG00000172936 | ENSG00000172936 | MYD88         | 3:3817996 | 133.25  | 85.798  | -0.44  | 7.87   | 0 | 0 yes     | 133.25   | 121.914  | 144.585  | 85.7979  | 79.5629  | 92.0328  |
| ENSG00000164542 | ENSG00000164542 | KIAA0895      | 7:3636382 | 23.036  | 14.852  | -0.439 | 3.5    | 0 | 0.008 yes | 23.0355  | 18.9295  | 27.1414  | 14.8515  | 12.2313  | 17.4717  |
| ENSG00000258930 | ENSG00000258930 | RP5-1163L11.2 | 14:713741 | 1.036   | 0.67    | -0.436 | 9.705  | 0 | 0 yes     | 1.03642  | 0.973862 | 1.09897  | 0.670359 | 0.625792 | 0.714926 |
| ENSG00000206612 | ENSG00000206612 | SNORA2A       | 12:490471 | 11.249  | 7.282   | -0.435 | 6.371  | 0 | 0 yes     | 11.2491  | 10.1728  | 12.3253  | 7.28243  | 6.57342  | 7.99143  |
| ENSG00000175309 | ENSG00000175309 | AGXT2L2       | 5:1776315 | 131.311 | 85.373  | -0.431 | 6.956  | 0 | 0 yes     | 131.311  | 121.656  | 140.966  | 85.3732  | 76.8707  | 93.8758  |
| ENSG00000107165 | ENSG00000107165 | TYRP1         | 9:1268543 | 53.706  | 34.963  | -0.429 | 3.701  | 0 | 0.004 yes | 53.7056  | 45.4455  | 61.9657  | 34.9629  | 28.8927  | 41.033   |
| ENSG00000130714 | ENSG00000130714 | POMT1         | 9:1343782 | 60.949  | 39.723  | -0.428 | 4.633  | 0 | 0 yes     | 60.9492  | 54.2637  | 67.6348  | 39.7232  | 33.8155  | 45.6308  |
| ENSG00000145022 | ENSG00000145022 | TCTA          | 3:4939657 | 26.444  | 17.233  | -0.428 | 3.795  | 0 | 0.003 yes | 26.4444  | 22.5486  | 30.3402  | 17.2331  | 14.2872  | 20.179   |
| ENSG00000175768 | ENSG00000175768 | TOMM5         | 9:3751088 | 95.123  | 62.025  | -0.428 | 4.881  | 0 | 0 yes     | 95.1228  | 85.0285  | 105.217  | 62.0245  | 53.3769  | 70.6721  |
| ENSG00000185728 | ENSG00000185728 | YTHDF3        | 8:6408111 | 41.894  | 27.307  | -0.428 | 4.162  | 0 | 0.001 yes | 41.8944  | 36.3096  | 47.4792  | 27.3074  | 23.0308  | 31.584   |
| ENSG00000130294 | ENSG00000130294 | KIF1A         | 2:2416531 | 76.09   | 49.733  | -0.425 | 3.506  | 0 | 0.008 yes | 76.0899  | 61.7445  | 90.4353  | 49.7334  | 42.1421  | 57.3247  |
| ENSG00000112419 | ENSG00000112419 | PHACTR2       | 6:1438579 | 24.441  | 15.99   | -0.424 | 3.694  | 0 | 0.004 yes | 24.4407  | 20.556   | 28.3254  | 15.9903  | 13.3384  | 18.6422  |
| ENSG00000167608 | ENSG00000167608 | TMC4          | 19:546638 | 198.977 | 130.242 | -0.424 | 5.123  | 0 | 0 yes     | 198.977  | 173.784  | 224.17   | 130.242  | 116.371  | 144.112  |
| ENSG00000080815 | ENSG00000080815 | PSEN1         | 14:736031 | 138.963 | 91.106  | -0.422 | 5.424  | 0 | 0 yes     | 138.963  | 126.048  | 151.879  | 91.1063  | 79.7295  | 102.483  |
| ENSG00000153936 | ENSG00000153936 | HS2ST1        | 1:8738033 | 8.608   | 5.647   | -0.422 | 3.542  | 0 | 0.007 yes | 8.60822  | 7.32794  | 9.8885   | 5.64693  | 4.59714  | 6.69671  |
| ENSG00000196712 | ENSG00000196712 | NF1           | 17:294219 | 34.065  | 22.511  | -0.414 | 3.49   | 0 | 0.009 yes | 34.0651  | 30.1863  | 37.9439  | 22.5109  | 17.8207  | 27.2011  |
| ENSG00000171401 | ENSG00000171401 | KRT13         | 17:396572 | 424.673 | 280.95  | -0.413 | 8.744  | 0 | 0 yes     | 424.673  | 398.538  | 450.807  | 280.95   | 260.801  | 301.099  |
| ENSG00000198492 | ENSG00000198492 | YTHDF2        | 1:2906313 | 90.236  | 59.708  | -0.413 | 3.552  | 0 | 0.007 yes | 90.2361  | 76.101   | 104.371  | 59.708   | 49.4489  | 69.9671  |
| ENSG00000075151 | ENSG00000075151 | EIF4G3        | 1:2113297 | 79.434  | 52.653  | -0.411 | 5.567  | 0 | 0 yes     | 79.4336  | 71.4956  | 87.3717  | 52.6526  | 46.9241  | 58.3811  |
| ENSG00000153046 | ENSG00000153046 | CDYL          | 6:4706344 | 25.657  | 17.015  | -0.411 | 4.658  | 0 | 0 yes     | 25.6571  | 22.5061  | 28.808   | 17.0148  | 14.8613  | 19.1684  |
| ENSG00000204618 | ENSG00000204618 | RNF39         | 6:3003448 | 21.949  | 14.588  | -0.409 | 3.733  | 0 | 0.004 yes | 21.9487  | 18.9341  | 24.9632  | 14.588   | 12.1022  | 17.0738  |
| ENSG00000078687 | ENSG00000078687 | TNRC6C        | 17:760002 | 20.719  | 13.781  | -0.408 | 4.211  | 0 | 0.001 yes | 20.7191  | 17.9064  | 23.5318  | 13.7808  | 11.8769  | 15.6847  |
| ENSG00000138061 | ENSG00000138061 | CYP1B1        | 2:3815032 | 60.375  | 40.213  | -0.406 | 3.752  | 0 | 0.003 yes | 60.3745  | 52.0558  | 68.6932  | 40.2129  | 33.4907  | 46.9352  |
| ENSG00000133027 | ENSG00000133027 | PEMT          | 17:174088 | 209.161 | 139.705 | -0.404 | 4.487  | 0 | 0 yes     | 209.161  | 188.603  | 229.719  | 139.705  | 118.655  | 160.754  |
| ENSG00000109452 | ENSG00000109452 | INPP4B        | 4:1429443 | 90.791  | 60.673  | -0.403 | 3.832  | 0 | 0.003 yes | 90.7913  | 81.811   | 99.7717  | 60.6732  | 49.4099  | 71.9365  |
| ENSG00000196208 | ENSG00000196208 | GREB1         | 2:1167424 | 46.778  | 31.369  | -0.4   | 3.734  | 0 | 0.004 yes | 46.7775  | 41.6344  | 51.9206  | 31.3688  | 25.6083  | 37.1294  |
| ENSG00000156170 | ENSG00000156170 | C8orf38       | 8:9582553 | 75.834  | 51.069  | -0.395 | 5.258  | 0 | 0 yes     | 75.8344  | 68.2014  | 83.4675  | 51.0694  | 45.3624  | 56.7764  |
| ENSG00000113645 | ENSG00000113645 | WWC1          | 5:1677186 | 864.398 | 582.949 | -0.394 | 7.153  | 0 | 0 yes     | 864.398  | 801.285  | 927.511  | 582.949  | 534.873  | 631.025  |
| ENSG00000115204 | ENSG00000115204 | MPV17         | 2:2750525 | 186.979 | 126.1   | -0.394 | 6.246  | 0 | 0 yes     | 186.979  | 172.609  | 201.348  | 126.1    | 113.488  | 138.712  |
| ENSG00000129083 | ENSG00000129083 | COPB1         | 11:144649 | 146.958 | 99.071  | -0.394 | 5.721  | 0 | 0 yes     | 146.958  | 134.18   | 159.737  | 99.0709  | 88.4724  | 109.669  |
| ENSG00000167397 | ENSG00000167397 | VKORC1        | 16:310857 | 127.567 | 86.054  | -0.394 | 5.24   | 0 | 0 yes     | 127.567  | 116.295  | 138.84   | 86.0541  | 75.5953  | 96.5129  |



|                 |                 |                |           |         |         |        |        |   |       |     |           |          |           |           |          |          |
|-----------------|-----------------|----------------|-----------|---------|---------|--------|--------|---|-------|-----|-----------|----------|-----------|-----------|----------|----------|
| ENSG00000145741 | ENSG00000145741 | BTF3           | 5:7279423 | 191.99  | 129.861 | -0.391 | 4.149  | 0 | 0.001 | yes | 191.99    | 167.494  | 216.486   | 129.861   | 111.844  | 147.878  |
| ENSG00000135414 | ENSG00000135414 | GDF11          | 12:561370 | 13.948  | 9.461   | -0.388 | 3.498  | 0 | 0.008 | yes | 13.9477   | 11.8894  | 16.006    | 9.46059   | 7.89226  | 11.0289  |
| ENSG00000142541 | ENSG00000142541 | RPL13A         | 19:499908 | 355.581 | 241.819 | -0.386 | 6.765  | 0 | 0     | yes | 355.581   | 332.726  | 378.435   | 241.819   | 219.054  | 264.583  |
| ENSG00000164742 | ENSG00000164742 | ADCY1          | 7:4561373 | 17.177  | 11.68   | -0.386 | 4.093  | 0 | 0.001 | yes | 17.1766   | 14.8683  | 19.4849   | 11.6797   | 10.1366  | 13.2229  |
| ENSG00000148344 | ENSG00000148344 | PTGES          | 9:1325006 | 52.179  | 35.492  | -0.385 | 4.273  | 0 | 0     | yes | 52.1791   | 45.9758  | 58.3823   | 35.4918   | 30.6772  | 40.3064  |
| ENSG00000197381 | ENSG00000197381 | ADARB1         | 21:464916 | 19.036  | 12.993  | -0.382 | 4.984  | 0 | 0     | yes | 19.0356   | 17.2641  | 20.8072   | 12.9925   | 11.4104  | 14.5746  |
| ENSG00000008710 | ENSG00000008710 | PKD1           | 16:208981 | 93.522  | 63.877  | -0.381 | 5.423  | 0 | 0     | yes | 93.5217   | 84.76    | 102.283   | 63.8772   | 57.1795  | 70.5748  |
| ENSG00000230259 | ENSG00000230259 | AC008738.2     | 19:337908 | 25.148  | 17.172  | -0.381 | 3.772  | 0 | 0.003 | yes | 25.1483   | 21.7929  | 28.5038   | 17.1723   | 14.5615  | 19.783   |
| ENSG00000136044 | ENSG00000136044 | APPL2          | 12:105567 | 99.533  | 68.044  | -0.38  | 4.493  | 0 | 0     | yes | 99.5329   | 88.7033  | 110.362   | 68.0438   | 59.2178  | 76.8697  |
| ENSG00000117419 | ENSG00000117419 | ERI3           | 1:4468674 | 89.66   | 61.506  | -0.377 | 4.261  | 0 | 0     | yes | 89.6595   | 77.6982  | 101.621   | 61.5058   | 54.3624  | 68.6492  |
| ENSG00000177192 | ENSG00000177192 | PUS1           | 12:132409 | 65.884  | 45.303  | -0.375 | 3.683  | 0 | 0.004 | yes | 65.8837   | 59.3146  | 72.4529   | 45.3029   | 37.2737  | 53.3321  |
| ENSG00000068724 | ENSG00000068724 | TTC7A          | 2:4712641 | 43.402  | 29.941  | -0.371 | 4.295  | 0 | 0     | yes | 43.4022   | 38.9982  | 47.8062   | 29.9413   | 25.7508  | 34.1318  |
| ENSG00000112715 | ENSG00000112715 | VEGFA          | 6:4373792 | 121.115 | 83.682  | -0.37  | 5.087  | 0 | 0     | yes | 121.115   | 110.062  | 132.167   | 83.6822   | 74.216   | 93.1484  |
| ENSG00000140961 | ENSG00000140961 | OSGIN1         | 16:839826 | 96.352  | 66.635  | -0.369 | 4.932  | 0 | 0     | yes | 96.3523   | 86.4921  | 106.212   | 66.6346   | 59.3666  | 73.9026  |
| ENSG00000116455 | ENSG00000116455 | WDR77          | 1:1119812 | 57.273  | 39.652  | -0.368 | 4.024  | 0 | 0.001 | yes | 57.2732   | 50.5572  | 63.9891   | 39.6523   | 34.094   | 45.2106  |
| ENSG00000169583 | ENSG00000169583 | CLIC3          | 9:1398890 | 583.564 | 404.938 | -0.365 | 8.058  | 0 | 0     | yes | 583.564   | 547.572  | 619.557   | 404.938   | 378.013  | 431.863  |
| ENSG00000001631 | ENSG00000001631 | KRIT1          | 7:9182828 | 109.497 | 76.266  | -0.362 | 4.31   | 0 | 0     | yes | 109.497   | 97.7524  | 121.242   | 76.2662   | 66.4204  | 86.112   |
| ENSG00000138794 | ENSG00000138794 | CASP6          | 4:1104813 | 79.549  | 55.38   | -0.362 | 4.155  | 0 | 0.001 | yes | 79.5492   | 70.5063  | 88.5922   | 55.3797   | 48.0596  | 62.6997  |
| ENSG00000115274 | ENSG00000115274 | INO80B         | 2:7468214 | 96.473  | 67.223  | -0.361 | 5.182  | 0 | 0     | yes | 96.4726   | 87.3476  | 105.598   | 67.2226   | 60.3368  | 74.1083  |
| ENSG00000233885 | ENSG00000233885 | YEATS2-AS1     | 3:1834156 | 0.152   | 0.106   | -0.36  | 4.906  | 0 | 0     | yes | 0.151812  | 0.137153 | 0.166471  | 0.105963  | 0.09428  | 0.117647 |
| ENSG00000084754 | ENSG00000084754 | HADHA          | 2:2641350 | 68.058  | 47.558  | -0.358 | 4.222  | 0 | 0.001 | yes | 68.0581   | 60.4435  | 75.6726   | 47.5584   | 41.4847  | 53.6322  |
| ENSG00000135486 | ENSG00000135486 | HNRNPA1        | 12:546247 | 198.144 | 138.684 | -0.357 | 5.192  | 0 | 0     | yes | 198.144   | 179.943  | 216.345   | 138.684   | 124.506  | 152.862  |
| ENSG00000258017 | ENSG00000258017 | RP11-386G11.10 | 12:495215 | 176.005 | 123.167 | -0.357 | 4.047  | 0 | 0.001 | yes | 176.005   | 155.765  | 196.245   | 123.167   | 106.689  | 139.646  |
| ENSG00000150893 | ENSG00000150893 | FREM2          | 13:392612 | 95.834  | 67.107  | -0.356 | 5.242  | 0 | 0     | yes | 95.8341   | 87.1759  | 104.492   | 67.1074   | 60.2898  | 73.9249  |
| ENSG00000218014 | ENSG00000218014 | RP11-263F15.1  | 6:7229442 | 179.419 | 125.761 | -0.355 | 4.742  | 0 | 0     | yes | 179.419   | 161.22   | 197.617   | 125.761   | 111.887  | 139.635  |
| ENSG00000238862 | ENSG00000238862 | SNORD19B       | 3:5252935 | 16.082  | 11.273  | -0.355 | 16.095 | 0 | 0     | yes | 16.0816   | 15.5855  | 16.5778   | 11.2731   | 10.9171  | 11.629   |
| ENSG00000106628 | ENSG00000106628 | POLD2          | 7:4415428 | 462.402 | 324.634 | -0.354 | 4.868  | 0 | 0     | yes | 462.402   | 414.445  | 510.36    | 324.634   | 291.589  | 357.679  |
| ENSG00000230042 | ENSG00000230042 | AK3P3          | 7:2314535 | 0.034   | 0.024   | -0.352 | 5.381  | 0 | 0     | yes | 0.0340106 | 0.030883 | 0.0371382 | 0.0239193 | 0.021694 | 0.026145 |
| ENSG00000089737 | ENSG00000089737 | DDX24          | 14:945172 | 223.289 | 157.211 | -0.351 | 6.962  | 0 | 0     | yes | 223.289   | 206.039  | 240.54    | 157.211   | 147.032  | 167.389  |
| ENSG00000251357 | ENSG00000251357 | AP000350.10    | 22:241988 | 82.276  | 57.936  | -0.351 | 3.492  | 0 | 0.009 | yes | 82.2757   | 71.2951  | 93.2563   | 57.9357   | 49.2392  | 66.6323  |
| ENSG00000167085 | ENSG00000167085 | PHB            | 17:474814 | 88.972  | 62.822  | -0.348 | 3.568  | 0 | 0.007 | yes | 88.9724   | 78.7257  | 99.2191   | 62.8218   | 52.9305  | 72.7132  |
| ENSG00000124302 | ENSG00000124302 | CHST8          | 19:341128 | 35.163  | 24.843  | -0.347 | 4.185  | 0 | 0.001 | yes | 35.1629   | 31.2229  | 39.1029   | 24.843    | 21.7991  | 27.8869  |
| ENSG00000147642 | ENSG00000147642 | SYBU           | 8:1105862 | 98.268  | 69.484  | -0.347 | 3.828  | 0 | 0.003 | yes | 98.2675   | 82.787   | 113.748   | 69.4837   | 63.2805  | 75.6868  |
| ENSG00000145016 | ENSG00000145016 | KIAA0226       | 3:1973982 | 70.13   | 50.05   | -0.337 | 3.718  | 0 | 0.004 | yes | 70.1301   | 61.9107  | 78.3495   | 50.05     | 43.1157  | 56.9844  |
| ENSG00000164414 | ENSG00000164414 | SLC35A1        | 6:8811770 | 47.037  | 33.61   | -0.336 | 3.79   | 0 | 0.003 | yes | 47.0368   | 41.5658  | 52.5078   | 33.6103   | 29.1096  | 38.111   |
| ENSG00000175224 | ENSG00000175224 | ATG13          | 11:466244 | 164.478 | 117.54  | -0.336 | 5.793  | 0 | 0     | yes | 164.478   | 152.011  | 176.945   | 117.54    | 107.217  | 127.862  |
| ENSG00000234751 | ENSG00000234751 | AP002381.2     | 11:725253 | 0.2     | 0.143   | -0.335 | 6.661  | 0 | 0     | yes | 0.200341  | 0.186288 | 0.214393  | 0.143352  | 0.133033 | 0.153671 |
| ENSG00000110047 | ENSG00000110047 | EHD1           | 11:646191 | 178.1   | 127.535 | -0.334 | 3.562  | 0 | 0.007 | yes | 178.1     | 162.53   | 193.671   | 127.535   | 106.382  | 148.688  |
| ENSG00000185963 | ENSG00000185963 | BICD2          | 9:9547364 | 15.986  | 11.463  | -0.333 | 4.473  | 0 | 0     | yes | 15.9864   | 14.4177  | 17.555    | 11.463    | 10.1819  | 12.7441  |
| ENSG00000167548 | ENSG00000167548 | MLL2           | 12:493889 | 90.079  | 64.636  | -0.332 | 4.614  | 0 | 0     | yes | 90.0785   | 81.7078  | 98.4491   | 64.6355   | 57.5367  | 71.7344  |
| ENSG00000119711 | ENSG00000119711 | ALDH6A1        | 14:743185 | 33.467  | 24.039  | -0.331 | 3.542  | 0 | 0.007 | yes | 33.4671   | 29.3899  | 37.5444   | 24.0387   | 20.6339  | 27.4436  |
| ENSG00000184047 | ENSG00000184047 | DIABLO         | 12:122688 | 137.147 | 98.797  | -0.328 | 5.501  | 0 | 0     | yes | 137.147   | 126.025  | 148.27    | 98.7971   | 90.159   | 107.435  |
| ENSG00000187514 | ENSG00000187514 | PTMA           | 2:2325716 | 759.594 | 547.774 | -0.327 | 5.23   | 0 | 0     | yes | 759.594   | 698.163  | 821.024   | 547.774   | 495.551  | 599.996  |
| ENSG00000164032 | ENSG00000164032 | H2AFZ          | 4:1008692 | 242.292 | 175.645 | -0.322 | 4.338  | 0 | 0     | yes | 242.292   | 217.363  | 267.22    | 175.645   | 156.888  | 194.403  |
| ENSG00000099337 | ENSG00000099337 | KCNK6          | 19:388104 | 55.498  | 40.397  | -0.318 | 4.045  | 0 | 0.001 | yes | 55.4979   | 49.6018  | 61.3941   | 40.3968   | 35.7249  | 45.0687  |
| ENSG00000122085 | ENSG00000122085 | MTERFD2        | 2:2419382 | 66.694  | 48.543  | -0.318 | 3.643  | 0 | 0.005 | yes | 66.6937   | 59.0734  | 74.3141   | 48.5428   | 42.1457  | 54.94    |
| ENSG00000135473 | ENSG00000135473 | PAN2           | 12:566654 | 106.969 | 77.828  | -0.318 | 4.153  | 0 | 0.001 | yes | 106.969   | 96.8023  | 117.135   | 77.8277   | 68.4792  | 87.1761  |
| ENSG00000172794 | ENSG00000172794 | RAB37          | 17:726667 | 107.707 | 78.351  | -0.318 | 5.158  | 0 | 0     | yes | 107.707   | 97.9555  | 117.459   | 78.3508   | 71.7823  | 84.9194  |
| ENSG00000257529 | ENSG00000257529 | RP1-164F3.9    | X:1006458 | 127.803 | 93.033  | -0.318 | 3.486  | 0 | 0.009 | yes | 127.803   | 112.23   | 143.377   | 93.0326   | 80.4305  | 105.635  |
| ENSG00000105778 | ENSG00000105778 | AVL9           | 7:3253503 | 94.311  | 68.683  | -0.317 | 4.625  | 0 | 0     | yes | 94.3111   | 85.6643  | 102.958   | 68.683    | 61.6796  | 75.6865  |

|                 |                 |              |            |         |         |        |        |   |       |     |          |          |          |         |          |          |
|-----------------|-----------------|--------------|------------|---------|---------|--------|--------|---|-------|-----|----------|----------|----------|---------|----------|----------|
| ENSG00000159423 | ENSG00000159423 | ALDH4A1      | 1:1916609: | 51.229  | 37.31   | -0.317 | 4.491  | 0 | 0     | yes | 51.2291  | 46.5424  | 55.9158  | 37.3098 | 33.2978  | 41.3219  |
| ENSG00000131051 | ENSG00000131051 | RBM39        | 20:342915: | 178.394 | 130.063 | -0.316 | 5.003  | 0 | 0     | yes | 178.394  | 163.354  | 193.434  | 130.063 | 117.828  | 142.297  |
| ENSG00000165792 | ENSG00000165792 | METTL17      | 14:214579: | 106.148 | 77.365  | -0.316 | 4.176  | 0 | 0.001 | yes | 106.148  | 95.853   | 116.443  | 77.3651 | 68.3631  | 86.3671  |
| ENSG00000157077 | ENSG00000157077 | ZFYVE9       | 1:5260804: | 9.508   | 6.937   | -0.315 | 3.53   | 0 | 0.008 | yes | 9.5078   | 8.40115  | 10.6144  | 6.93744 | 5.99785  | 7.87704  |
| ENSG00000116299 | ENSG00000116299 | KIAA1324     | 1:1096485: | 396.589 | 290.516 | -0.311 | 3.953  | 0 | 0.002 | yes | 396.589  | 373.478  | 419.7    | 290.516 | 248.02   | 333.012  |
| ENSG00000163812 | ENSG00000163812 | ZDHHC3       | 3:4495674: | 85.699  | 62.827  | -0.31  | 3.728  | 0 | 0.004 | yes | 85.6994  | 76.1289  | 95.27    | 62.8274 | 55.0651  | 70.5897  |
| ENSG00000105662 | ENSG00000105662 | CRTC1        | 19:187944: | 11.359  | 8.341   | -0.309 | 3.686  | 0 | 0.004 | yes | 11.3588  | 10.0891  | 12.6286  | 8.34118 | 7.29998  | 9.38238  |
| ENSG00000085831 | ENSG00000085831 | TTC39A       | 1:5175292: | 260.022 | 191.049 | -0.308 | 5.972  | 0 | 0     | yes | 260.022  | 242.013  | 278.032  | 191.049 | 176.428  | 205.671  |
| ENSG00000182899 | ENSG00000182899 | RPL35A       | 3:1976159: | 312.066 | 230.482 | -0.303 | 4.22   | 0 | 0.001 | yes | 312.066  | 286.373  | 337.759  | 230.482 | 203.362  | 257.602  |
| ENSG00000144118 | ENSG00000144118 | RALB         | 2:1209976: | 101.051 | 74.782  | -0.301 | 3.695  | 0 | 0.004 | yes | 101.051  | 87.9152  | 114.187  | 74.7824 | 67.4354  | 82.1295  |
| ENSG00000168350 | ENSG00000168350 | DEGS2        | 14:100612: | 283.732 | 210.042 | -0.301 | 4.363  | 0 | 0     | yes | 283.732  | 257.575  | 309.89   | 210.042 | 188.511  | 231.572  |
| ENSG00000248487 | ENSG00000248487 | ABHD14A      | 3:5198932: | 63.762  | 47.256  | -0.3   | 3.61   | 0 | 0.006 | yes | 63.7615  | 56.7719  | 70.7512  | 47.2555 | 41.3653  | 53.1457  |
| ENSG00000057608 | ENSG00000057608 | GDI2         | 10:580718: | 152.525 | 113.183 | -0.298 | 4.119  | 0 | 0.001 | yes | 152.525  | 136.671  | 168.38   | 113.183 | 101.766  | 124.601  |
| ENSG00000173402 | ENSG00000173402 | DAG1         | 3:4950614: | 145.924 | 108.416 | -0.297 | 4.492  | 0 | 0     | yes | 145.924  | 132.914  | 158.933  | 108.416 | 97.8218  | 119.01   |
| ENSG00000113716 | ENSG00000113716 | HMGXB3       | 5:1493402: | 64.296  | 47.846  | -0.296 | 4.138  | 0 | 0.001 | yes | 64.2963  | 58.065   | 70.5276  | 47.8457 | 42.8267  | 52.8648  |
| ENSG00000072274 | ENSG00000072274 | TFRC         | 3:1957540: | 476.146 | 354.854 | -0.294 | 5.191  | 0 | 0     | yes | 476.146  | 438.299  | 513.993  | 354.854 | 326.218  | 383.49   |
| ENSG00000137411 | ENSG00000137411 | VARS2        | 6:3087596: | 79.519  | 59.259  | -0.294 | 4.074  | 0 | 0.001 | yes | 79.519   | 72.5484  | 86.4896  | 59.2593 | 52.4615  | 66.057   |
| ENSG00000149485 | ENSG00000149485 | FADS1        | 11:615670: | 134.164 | 100.069 | -0.293 | 4.202  | 0 | 0.001 | yes | 134.164  | 121.748  | 146.58   | 100.069 | 89.6178  | 110.52   |
| ENSG00000003989 | ENSG00000003989 | SLC7A2       | 8:1735459: | 23.774  | 17.746  | -0.292 | 3.791  | 0 | 0.003 | yes | 23.7742  | 21.3004  | 26.248   | 17.7464 | 15.7252  | 19.7677  |
| ENSG00000205476 | ENSG00000205476 | CCDC85C      | 14:999475: | 118.334 | 88.339  | -0.292 | 4.392  | 0 | 0     | yes | 118.334  | 107.77   | 128.898  | 88.3389 | 79.6172  | 97.0606  |
| ENSG00000198900 | ENSG00000198900 | TOP1         | 20:396574: | 39.673  | 29.802  | -0.286 | 3.681  | 0 | 0.004 | yes | 39.6734  | 35.4841  | 43.8628  | 29.8023 | 26.4031  | 33.2014  |
| ENSG00000143416 | ENSG00000143416 | SELENBP1     | 1:1513367: | 870.164 | 657.046 | -0.281 | 5.77   | 0 | 0     | yes | 870.164  | 810.504  | 929.825  | 657.046 | 611.62   | 702.473  |
| ENSG00000168769 | ENSG00000168769 | TET2         | 4:1060670: | 7.486   | 5.652   | -0.281 | 4.16   | 0 | 0.001 | yes | 7.48648  | 6.80449  | 8.16847  | 5.6519  | 5.08769  | 6.21611  |
| ENSG00000135052 | ENSG00000135052 | GOLM1        | 9:8864106: | 221.564 | 167.431 | -0.28  | 4.432  | 0 | 0     | yes | 221.564  | 203.308  | 239.819  | 167.431 | 151.378  | 183.484  |
| ENSG00000198755 | ENSG00000198755 | RPL10A       | 6:3543618: | 239.493 | 181.033 | -0.28  | 4.4    | 0 | 0     | yes | 239.493  | 220.28   | 258.706  | 181.033 | 163.162  | 198.903  |
| ENSG00000257727 | ENSG00000257727 | CNPY2        | 12:566654: | 129.97  | 98.572  | -0.277 | 3.542  | 0 | 0.007 | yes | 129.97   | 116.167  | 143.772  | 98.5716 | 87.2899  | 109.853  |
| ENSG00000255329 | ENSG00000255329 | CTA-797E19.3 | 11:701168: | 0.455   | 0.347   | -0.272 | 16.487 | 0 | 0     | yes | 0.455056 | 0.444715 | 0.465398 | 0.34652 | 0.338203 | 0.354838 |
| ENSG00000136883 | ENSG00000136883 | KIF12        | 9:1168484: | 367.963 | 281.431 | -0.268 | 4.784  | 0 | 0     | yes | 367.963  | 340.027  | 395.899  | 281.431 | 258.224  | 304.638  |
| ENSG00000100568 | ENSG00000100568 | VTI1B        | 14:680865: | 99.332  | 76.076  | -0.267 | 3.504  | 0 | 0.008 | yes | 99.3319  | 89.4042  | 109.26   | 76.0764 | 67.3379  | 84.8149  |
| ENSG00000184205 | ENSG00000184205 | TSPYL2       | X:5311154: | 169.161 | 129.819 | -0.265 | 4.685  | 0 | 0     | yes | 169.161  | 155.999  | 182.323  | 129.819 | 119.18   | 140.457  |
| ENSG00000054148 | ENSG00000054148 | PHPT1        | 9:1397431: | 169.748 | 130.355 | -0.264 | 4.031  | 0 | 0.001 | yes | 169.748  | 155.468  | 184.027  | 130.355 | 117.265  | 143.445  |
| ENSG00000133872 | ENSG00000133872 | TMEM66       | 8:2992052: | 355.125 | 272.867 | -0.263 | 4.988  | 0 | 0     | yes | 355.125  | 329.489  | 380.761  | 272.867 | 251.82   | 293.914  |
| ENSG00000141753 | ENSG00000141753 | IGFBP4       | 17:385997: | 412.306 | 317.468 | -0.261 | 5.249  | 0 | 0     | yes | 412.306  | 383.815  | 440.797  | 317.468 | 294.696  | 340.24   |
| ENSG00000186868 | ENSG00000186868 | MAPT         | 17:439717: | 27.533  | 21.22   | -0.26  | 3.954  | 0 | 0.002 | yes | 27.5327  | 25.0202  | 30.0452  | 21.2203 | 19.2051  | 23.2356  |
| ENSG00000141524 | ENSG00000141524 | TMC6         | 17:761089: | 61.173  | 47.241  | -0.258 | 3.785  | 0 | 0.003 | yes | 61.1732  | 56.2255  | 66.1209  | 47.2407 | 42.0431  | 52.4382  |
| ENSG00000231500 | ENSG00000231500 | RPS18        | 6:3321731: | 728.882 | 565.655 | -0.254 | 3.912  | 0 | 0.002 | yes | 728.882  | 663.025  | 794.74   | 565.655 | 513.079  | 618.23   |
| ENSG00000171302 | ENSG00000171302 | CANT1        | 17:769877: | 163.074 | 126.8   | -0.252 | 5.179  | 0 | 0     | yes | 163.074  | 152.261  | 173.888  | 126.8   | 117.796  | 135.803  |
| ENSG00000177685 | ENSG00000177685 | EFCAB4A      | 11:818901: | 141.57  | 110.093 | -0.251 | 4.848  | 0 | 0     | yes | 141.57   | 131.632  | 151.508  | 110.093 | 101.682  | 118.503  |
| ENSG00000102882 | ENSG00000102882 | MAPK3        | 16:301254: | 282.598 | 220.036 | -0.25  | 5.604  | 0 | 0     | yes | 282.598  | 264.577  | 300.62   | 220.036 | 206.282  | 233.791  |
| ENSG00000139624 | ENSG00000139624 | CERS5        | 12:505057: | 141.861 | 110.553 | -0.249 | 3.842  | 0 | 0.002 | yes | 141.861  | 129.308  | 154.414  | 110.553 | 100.053  | 121.053  |
| ENSG00000087111 | ENSG00000087111 | PIGS         | 17:268804: | 137.538 | 107.282 | -0.248 | 3.965  | 0 | 0.002 | yes | 137.538  | 125.915  | 149.16   | 107.282 | 97.3522  | 117.212  |
| ENSG00000113758 | ENSG00000113758 | DBN1         | 5:1768836: | 321.979 | 252.334 | -0.244 | 4.689  | 0 | 0     | yes | 321.979  | 299.083  | 344.874  | 252.334 | 233.195  | 271.474  |
| ENSG00000182199 | ENSG00000182199 | SHMT2        | 12:576231: | 246.302 | 193.632 | -0.241 | 5.196  | 0 | 0     | yes | 246.302  | 230.317  | 262.286  | 193.632 | 180.839  | 206.425  |
| ENSG00000164924 | ENSG00000164924 | YWHAZ        | 8:1019308: | 249.648 | 196.779 | -0.238 | 4.774  | 0 | 0     | yes | 249.648  | 233.268  | 266.027  | 196.779 | 182.007  | 211.551  |
| ENSG00000120738 | ENSG00000120738 | EGR1         | 5:1378011: | 186.902 | 147.417 | -0.237 | 4.499  | 0 | 0     | yes | 186.902  | 173.423  | 200.38   | 147.417 | 136.065  | 158.77   |
| ENSG00000130702 | ENSG00000130702 | LAMA5        | 20:608771: | 695.803 | 550.322 | -0.235 | 5.476  | 0 | 0     | yes | 695.803  | 656.124  | 735.481  | 550.322 | 515.136  | 585.507  |
| ENSG00000100412 | ENSG00000100412 | ACO2         | 22:418651: | 73.865  | 58.462  | -0.234 | 3.694  | 0 | 0.004 | yes | 73.8654  | 67.2088  | 80.522   | 58.4618 | 53.2605  | 63.6631  |
| ENSG00000131759 | ENSG00000131759 | RARA         | 17:384654: | 173.216 | 137.447 | -0.231 | 4.701  | 0 | 0     | yes | 173.216  | 161.23   | 185.202  | 137.447 | 127.832  | 147.063  |
| ENSG00000164466 | ENSG00000164466 | SFXN1        | 5:1749040: | 347.991 | 276.252 | -0.231 | 4.279  | 0 | 0     | yes | 347.991  | 324.937  | 371.046  | 276.252 | 252.72   | 299.784  |
| ENSG00000171345 | ENSG00000171345 | KRT19        | 17:396798: | 2912.98 | 2316.13 | -0.229 | 6.013  | 0 | 0     | yes | 2912.98  | 2758.02  | 3067.95  | 2316.13 | 2189.56  | 2442.7   |

|                 |                 |                |           |         |         |            |            |   |       |     |            |            |            |         |         |         |
|-----------------|-----------------|----------------|-----------|---------|---------|------------|------------|---|-------|-----|------------|------------|------------|---------|---------|---------|
| ENSG00000172809 | ENSG00000172809 | RPL38          | 17:721997 | 876.643 | 700.706 | -0.224     | 3.886      | 0 | 0.002 | yes | 876.643    | 807.855    | 945.431    | 700.706 | 641.528 | 759.883 |
| ENSG00000072310 | ENSG00000072310 | SREBF1         | 17:175847 | 1697.02 | 1361.28 | -0.22      | 7.539      | 0 | 0     | yes | 1697.02    | 1628.82    | 1765.23    | 1361.28 | 1303.45 | 1419.1  |
| ENSG00000010404 | ENSG00000010404 | IDS            | X:1485585 | 124.117 | 100.141 | -0.215     | 3.741      | 0 | 0.004 | yes | 124.117    | 114.47     | 133.764    | 100.141 | 91.6882 | 108.594 |
| ENSG00000157106 | ENSG00000157106 | SMG1           | 16:188161 | 18.612  | 15.02   | -0.214     | 3.683      | 0 | 0.004 | yes | 18.6118    | 17.0723    | 20.1514    | 15.02   | 13.7891 | 16.2508 |
| ENSG00000123349 | ENSG00000123349 | PFDN5          | 12:536890 | 609.964 | 497.054 | -0.205     | 3.765      | 0 | 0.003 | yes | 609.964    | 565.67     | 654.258    | 497.054 | 456.814 | 537.293 |
| ENSG00000175416 | ENSG00000175416 | CLTB           | 5:1757924 | 582.195 | 475.78  | -0.202     | 4.048      | 0 | 0.001 | yes | 582.195    | 542.182    | 622.208    | 475.78  | 441.402 | 510.158 |
| ENSG00000182473 | ENSG00000182473 | EXOC7          | 17:740752 | 179.121 | 146.738 | -0.199     | 3.982      | 0 | 0.001 | yes | 179.121    | 169.694    | 188.549    | 146.738 | 134.235 | 159.24  |
| ENSG00000100280 | ENSG00000100280 | AP1B1          | 22:297236 | 180.995 | 149.554 | -0.191     | 4.449      | 0 | 0     | yes | 180.995    | 170.324    | 191.666    | 149.554 | 140.236 | 158.871 |
| ENSG00000133112 | ENSG00000133112 | TPT1           | 13:459110 | 1041.63 | 863.239 | -0.188     | 4.009      | 0 | 0.001 | yes | 1041.63    | 976.631    | 1106.62    | 863.239 | 802.886 | 923.593 |
| ENSG00000110492 | ENSG00000110492 | MDK            | 11:464023 | 470.305 | 390.505 | -0.186     | 3.535      | 0 | 0.007 | yes | 470.305    | 436.593    | 504.016    | 390.505 | 360.435 | 420.575 |
| ENSG00000112655 | ENSG00000112655 | PTK7           | 6:4304400 | 227.101 | 188.712 | -0.185     | 3.746      | 0 | 0.004 | yes | 227.101    | 211.228    | 242.974    | 188.712 | 175.52  | 201.904 |
| ENSG00000127837 | ENSG00000127837 | AAMP           | 2:2191288 | 535.893 | 446.557 | -0.182     | 4.042      | 0 | 0.001 | yes | 535.893    | 501.714    | 570.073    | 446.557 | 418.056 | 475.058 |
| ENSG00000167972 | ENSG00000167972 | ABCA3          | 16:232587 | 138.976 | 115.922 | -0.181     | 3.749      | 0 | 0.003 | yes | 138.976    | 129.435    | 148.518    | 115.922 | 108.017 | 123.826 |
| ENSG00000163468 | ENSG00000163468 | CCT3           | 1:1562787 | 724.44  | 606.864 | -0.177     | 4.815      | 0 | 0     | yes | 724.44     | 688.746    | 760.133    | 606.864 | 573.713 | 640.014 |
| ENSG00000181222 | ENSG00000181222 | SLC35G6        | 17:736268 | 210.169 | 176.63  | -0.174     | 4.455      | 0 | 0     | yes | 210.169    | 198.781    | 221.557    | 176.63  | 166.709 | 186.551 |
| ENSG00000107331 | ENSG00000107331 | ABCA2          | 9:1399016 | 719.226 | 605.358 | -0.172     | 3.971      | 0 | 0.002 | yes | 719.226    | 678.76     | 759.692    | 605.358 | 565.338 | 645.377 |
| ENSG00000183495 | ENSG00000183495 | EP400          | 12:132434 | 18.926  | 16      | -0.168     | 3.596      | 0 | 0.006 | yes | 18.9262    | 17.6996    | 20.1528    | 16.0002 | 14.9241 | 17.0763 |
| ENSG00000142192 | ENSG00000142192 | APP            | 21:272528 | 420.199 | 356.214 | -0.165     | 3.617      | 0 | 0.006 | yes | 420.199    | 393.374    | 447.025    | 356.214 | 332.945 | 379.483 |
| ENSG00000196498 | ENSG00000196498 | NCOR2          | 12:124808 | 663.199 | 563.827 | -0.162     | 3.866      | 0 | 0.002 | yes | 663.199    | 624.335    | 702.063    | 563.827 | 529.906 | 597.747 |
| ENSG00000124222 | ENSG00000124222 | STX16          | 20:572263 | 213.601 | 182.651 | -0.157     | 3.517      | 0 | 0.008 | yes | 213.601    | 200.684    | 226.519    | 182.651 | 170.721 | 194.582 |
| ENSG00000007202 | ENSG00000007202 | KIAA0100       | 17:269046 | 131.683 | 112.958 | -0.153     | 3.75       | 0 | 0.003 | yes | 131.683    | 124.106    | 139.261    | 112.958 | 106.391 | 119.526 |
| ENSG00000197102 | ENSG00000197102 | DYNC1H1        | 14:102430 | 726.352 | 627.452 | -0.146     | 3.856      | 0 | 0.002 | yes | 726.352    | 687.407    | 765.297    | 627.452 | 593.728 | 661.175 |
| ENSG00000197746 | ENSG00000197746 | PSAP           | 10:735760 | 420.294 | 366.806 | -0.136     | 3.499      | 0 | 0.008 | yes | 420.294    | 397.424    | 443.164    | 366.806 | 346.404 | 387.208 |
| ENSG00000143569 | ENSG00000143569 | UBAP2L         | 1:1541791 | 431.456 | 383.399 | -0.118     | 3.545      | 0 | 0.007 | yes | 431.456    | 411.579    | 451.333    | 383.399 | 364.948 | 401.85  |
| ENSG00000111644 | ENSG00000111644 | ACRBP          | 12:672800 | 0.246   | 0       | -1.79769e+ | -1.79769e+ | 0 | 0.001 | yes | 0.246093   | 0.116939   | 0.375246   | 0       | 0       | 0       |
| ENSG00000116701 | ENSG00000116701 | NCF2           | 1:1834300 | 0.031   | 0       | -1.79769e+ | -1.79769e+ | 0 | 0     | yes | 0.0305123  | 0.0292698  | 0.0317549  | 0       | 0       | 0       |
| ENSG00000116783 | ENSG00000116783 | AC093158.1     | 1:7466392 | 0.193   | 0       | -1.79769e+ | -1.79769e+ | 0 | 0     | yes | 0.193163   | 0.153636   | 0.23269    | 0       | 0       | 0       |
| ENSG00000121318 | ENSG00000121318 | TAS2R10        | 12:109775 | 0.062   | 0       | -1.79769e+ | -1.79769e+ | 0 | 0     | yes | 0.0616099  | 0.0510048  | 0.0722149  | 0       | 0       | 0       |
| ENSG00000122986 | ENSG00000122986 | HVCN1          | 12:111051 | 0.018   | 0       | -1.79769e+ | -1.79769e+ | 0 | 0     | yes | 0.0175458  | 0.0152693  | 0.0198222  | 0       | 0       | 0       |
| ENSG00000124208 | ENSG00000124208 | TMEM189-UBE2V1 | 20:486976 | 1.531   | 0       | -1.79769e+ | -1.79769e+ | 0 | 0     | yes | 1.53106    | 1.05472    | 2.00741    | 0       | 0       | 0       |
| ENSG00000127364 | ENSG00000127364 | TAS2R4         | 7:1414041 | 0.006   | 0       | -1.79769e+ | -1.79769e+ | 0 | 0     | yes | 0.00639384 | 0.00580648 | 0.0069812  | 0       | 0       | 0       |
| ENSG00000134398 | ENSG00000134398 | ERN2           | 16:236901 | 1.253   | 0       | -1.79769e+ | -1.79769e+ | 0 | 0     | yes | 1.25293    | 0.866207   | 1.63965    | 0       | 0       | 0       |
| ENSG00000152672 | ENSG00000152672 | CLEC4F         | 2:7103577 | 1.11    | 0       | -1.79769e+ | -1.79769e+ | 0 | 0     | yes | 1.10985    | 0.586846   | 1.63286    | 0       | 0       | 0       |
| ENSG00000165409 | ENSG00000165409 | TSHR           | 14:809433 | 0.184   | 0       | -1.79769e+ | -1.79769e+ | 0 | 0     | yes | 0.183985   | 0.148407   | 0.219564   | 0       | 0       | 0       |
| ENSG00000167355 | ENSG00000167355 | AC104389.28    | 11:527441 | 0.046   | 0       | -1.79769e+ | -1.79769e+ | 0 | 0     | yes | 0.0457774  | 0.0364332  | 0.0551217  | 0       | 0       | 0       |
| ENSG00000170509 | ENSG00000170509 | HSD17B13       | 4:8822494 | 1.619   | 0       | -1.79769e+ | -1.79769e+ | 0 | 0     | yes | 1.61937    | 1.09367    | 2.14508    | 0       | 0       | 0       |
| ENSG00000171189 | ENSG00000171189 | GRIK1          | 21:305658 | 0.024   | 0       | -1.79769e+ | -1.79769e+ | 0 | 0     | yes | 0.0235733  | 0.0196704  | 0.0274763  | 0       | 0       | 0       |
| ENSG00000172209 | ENSG00000172209 | GPR22          | 7:1068094 | 0.029   | 0       | -1.79769e+ | -1.79769e+ | 0 | 0     | yes | 0.0289486  | 0.0275876  | 0.0303096  | 0       | 0       | 0       |
| ENSG00000173585 | ENSG00000173585 | CCR9           | 3:4586480 | 0.02    | 0       | -1.79769e+ | -1.79769e+ | 0 | 0.008 | yes | 0.0203228  | 0.00803473 | 0.032611   | 0       | 0       | 0       |
| ENSG00000175206 | ENSG00000175206 | NPPA           | 1:1182184 | 0.053   | 0       | -1.79769e+ | -1.79769e+ | 0 | 0     | yes | 0.0529668  | 0.0490512  | 0.0568823  | 0       | 0       | 0       |
| ENSG00000175773 | ENSG00000175773 | RP11-121M22.1  | 11:130096 | 0.014   | 0       | -1.79769e+ | -1.79769e+ | 0 | 0     | yes | 0.0143368  | 0.0120769  | 0.0165966  | 0       | 0       | 0       |
| ENSG00000177182 | ENSG00000177182 | CLVS1          | 8:6196971 | 0.18    | 0       | -1.79769e+ | -1.79769e+ | 0 | 0     | yes | 0.180134   | 0.162576   | 0.197692   | 0       | 0       | 0       |
| ENSG00000178965 | ENSG00000178965 | C1orf173       | 1:7501808 | 0.024   | 0       | -1.79769e+ | -1.79769e+ | 0 | 0     | yes | 0.0235562  | 0.0217334  | 0.0253791  | 0       | 0       | 0       |
| ENSG00000179256 | ENSG00000179256 | C12orf69       | 12:149565 | 0.008   | 0       | -1.79769e+ | -1.79769e+ | 0 | 0     | yes | 0.00844278 | 0.00573892 | 0.0111466  | 0       | 0       | 0       |
| ENSG00000183426 | ENSG00000183426 | NPIP           | 16:147664 | 0.006   | 0       | -1.79769e+ | -1.79769e+ | 0 | 0     | yes | 0.006221   | 0.00382647 | 0.00861554 | 0       | 0       | 0       |
| ENSG00000184084 | ENSG00000184084 | CTD-2372A4.1   | 5:7292198 | 0.327   | 0       | -1.79769e+ | -1.79769e+ | 0 | 0     | yes | 0.326936   | 0.302602   | 0.351271   | 0       | 0       | 0       |
| ENSG00000184434 | ENSG00000184434 | LRRC19         | 9:2690408 | 0.002   | 0       | -1.79769e+ | -1.79769e+ | 0 | 0     | yes | 0.00198668 | 0.00181193 | 0.00216143 | 0       | 0       | 0       |
| ENSG00000187144 | ENSG00000187144 | SPATA21        | 1:1667906 | 0.023   | 0       | -1.79769e+ | -1.79769e+ | 0 | 0     | yes | 0.0232852  | 0.0221493  | 0.0244212  | 0       | 0       | 0       |
| ENSG00000187721 | ENSG00000187721 | RP11-301J16.2  | 13:195208 | 0.229   | 0       | -1.79769e+ | -1.79769e+ | 0 | 0     | yes | 0.229221   | 0.155811   | 0.30263    | 0       | 0       | 0       |
| ENSG00000187747 | ENSG00000187747 | OR52B6         | 11:527441 | 0.053   | 0       | -1.79769e+ | -1.79769e+ | 0 | 0     | yes | 0.0530712  | 0.0422381  | 0.0639044  | 0       | 0       | 0       |

|                 |                 |                 |           |        |   |                       |   |       |     |            |            |            |   |   |   |
|-----------------|-----------------|-----------------|-----------|--------|---|-----------------------|---|-------|-----|------------|------------|------------|---|---|---|
| ENSG00000197071 | ENSG00000197071 | AC010243.1      | 5:8748544 | 0.15   | 0 | -1.79769e+ -1.79769e+ | 0 | 0     | yes | 0.150239   | 0.118912   | 0.181567   | 0 | 0 | 0 |
| ENSG00000198553 | ENSG00000198553 | KCNRG           | 13:505700 | 7.476  | 0 | -1.79769e+ -1.79769e+ | 0 | 0     | yes | 7.47569    | 6.03907    | 8.9123     | 0 | 0 | 0 |
| ENSG00000199509 | ENSG00000199509 | 5S_rRNA         | 20:211066 | 2.085  | 0 | -1.79769e+ -1.79769e+ | 0 | 0     | yes | 2.08484    | 1.54654    | 2.62315    | 0 | 0 | 0 |
| ENSG00000199719 | ENSG00000199719 | 7SK             | 20:182691 | 0.556  | 0 | -1.79769e+ -1.79769e+ | 0 | 0     | yes | 0.556108   | 0.454151   | 0.658064   | 0 | 0 | 0 |
| ENSG00000201199 | ENSG00000201199 | snoU2_19        | 11:933948 | 57.05  | 0 | -1.79769e+ -1.79769e+ | 0 | 0     | yes | 57.0499    | 52.0938    | 62.0061    | 0 | 0 | 0 |
| ENSG00000202415 | ENSG00000202415 | 7SK             | 1:9982170 | 0.229  | 0 | -1.79769e+ -1.79769e+ | 0 | 0     | yes | 0.22915    | 0.193363   | 0.264937   | 0 | 0 | 0 |
| ENSG00000203466 | ENSG00000203466 | RP11-182J1.4    | 15:851426 | 0.206  | 0 | -1.79769e+ -1.79769e+ | 0 | 0     | yes | 0.206228   | 0.15914    | 0.253316   | 0 | 0 | 0 |
| ENSG00000204422 | ENSG00000204422 | LY6G6E          | 6:3165472 | 1.205  | 0 | -1.79769e+ -1.79769e+ | 0 | 0     | yes | 1.20522    | 0.742346   | 1.6681     | 0 | 0 | 0 |
| ENSG00000204775 | ENSG00000204775 | AC145291.1      | 8:1453170 | 0.589  | 0 | -1.79769e+ -1.79769e+ | 0 | 0.008 | yes | 0.589305   | 0.233941   | 0.944669   | 0 | 0 | 0 |
| ENSG00000205231 | ENSG00000205231 | RP11-465B22.6   | 1:1108435 | 0.02   | 0 | -1.79769e+ -1.79769e+ | 0 | 0.002 | yes | 0.0202302  | 0.00941671 | 0.0310437  | 0 | 0 | 0 |
| ENSG00000205424 | ENSG00000205424 | AL592528.1      | 21:470636 | 0.01   | 0 | -1.79769e+ -1.79769e+ | 0 | 0     | yes | 0.0101545  | 0.008244   | 0.012065   | 0 | 0 | 0 |
| ENSG00000207145 | ENSG00000207145 | SNORA18         | 11:933948 | 7.662  | 0 | -1.79769e+ -1.79769e+ | 0 | 0     | yes | 7.66211    | 6.99647    | 8.32775    | 0 | 0 | 0 |
| ENSG00000207185 | ENSG00000207185 | U6              | 11:118307 | 10.857 | 0 | -1.79769e+ -1.79769e+ | 0 | 0     | yes | 10.8572    | 10.5506    | 11.1638    | 0 | 0 | 0 |
| ENSG00000207314 | ENSG00000207314 | SNORA44         | 1:2887959 | 13.188 | 0 | -1.79769e+ -1.79769e+ | 0 | 0     | yes | 13.1884    | 11.7494    | 14.6274    | 0 | 0 | 0 |
| ENSG00000207601 | ENSG00000207601 | MIR611          | 11:614479 | 18.648 | 0 | -1.79769e+ -1.79769e+ | 0 | 0     | yes | 18.6482    | 17.4476    | 19.8488    | 0 | 0 | 0 |
| ENSG00000212464 | ENSG00000212464 | SNORA12         | 10:101989 | 7.493  | 0 | -1.79769e+ -1.79769e+ | 0 | 0     | yes | 7.49289    | 6.60676    | 8.37901    | 0 | 0 | 0 |
| ENSG00000212496 | ENSG00000212496 | U6              | 12:505695 | 4.651  | 0 | -1.79769e+ -1.79769e+ | 0 | 0     | yes | 4.65115    | 4.23091    | 5.07138    | 0 | 0 | 0 |
| ENSG00000213703 | ENSG00000213703 | RP5-849H19.2    | 1:6292039 | 0.126  | 0 | -1.79769e+ -1.79769e+ | 0 | 0     | yes | 0.125815   | 0.111836   | 0.139795   | 0 | 0 | 0 |
| ENSG00000213707 | ENSG00000213707 | HMGB1P10        | 22:269214 | 0.233  | 0 | -1.79769e+ -1.79769e+ | 0 | 0     | yes | 0.232937   | 0.189494   | 0.27638    | 0 | 0 | 0 |
| ENSG00000214535 | ENSG00000214535 | RPS15AP1        | 20:211066 | 0.144  | 0 | -1.79769e+ -1.79769e+ | 0 | 0     | yes | 0.143998   | 0.106818   | 0.181178   | 0 | 0 | 0 |
| ENSG00000214593 | ENSG00000214593 | RP11-65N13.6    | 9:1280240 | 1.053  | 0 | -1.79769e+ -1.79769e+ | 0 | 0     | yes | 1.05301    | 0.989077   | 1.11695    | 0 | 0 | 0 |
| ENSG00000217624 | ENSG00000217624 | RP11-204C16.4   | X:4137418 | 0.048  | 0 | -1.79769e+ -1.79769e+ | 0 | 0     | yes | 0.048493   | 0.0437148  | 0.0532711  | 0 | 0 | 0 |
| ENSG00000219790 | ENSG00000219790 | RP11-129K24.3   | 6:5681977 | 0.242  | 0 | -1.79769e+ -1.79769e+ | 0 | 0     | yes | 0.241654   | 0.169607   | 0.313701   | 0 | 0 | 0 |
| ENSG00000220891 | ENSG00000220891 | LL22NC03-63E9.3 | 22:228901 | 0.006  | 0 | -1.79769e+ -1.79769e+ | 0 | 0     | yes | 0.00574986 | 0.00492423 | 0.00657549 | 0 | 0 | 0 |
| ENSG00000221025 | ENSG00000221025 | MIR1250         | 17:790089 | 17.27  | 0 | -1.79769e+ -1.79769e+ | 0 | 0     | yes | 17.2698    | 16.3487    | 18.191     | 0 | 0 | 0 |
| ENSG00000221170 | ENSG00000221170 | MIR1304         | 11:933948 | 36.037 | 0 | -1.79769e+ -1.79769e+ | 0 | 0     | yes | 36.037     | 32.9063    | 39.1677    | 0 | 0 | 0 |
| ENSG00000221585 | ENSG00000221585 | MIR1226         | 3:4784439 | 61.999 | 0 | -1.79769e+ -1.79769e+ | 0 | 0     | yes | 61.9988    | 59.3165    | 64.6811    | 0 | 0 | 0 |
| ENSG00000221656 | ENSG00000221656 | MIR1225         | 16:208981 | 36.98  | 0 | -1.79769e+ -1.79769e+ | 0 | 0     | yes | 36.9801    | 35.9619    | 37.9982    | 0 | 0 | 0 |
| ENSG00000222383 | ENSG00000222383 | 5S_rRNA         | 6:1074797 | 4.517  | 0 | -1.79769e+ -1.79769e+ | 0 | 0     | yes | 4.51654    | 3.05118    | 5.9819     | 0 | 0 | 0 |
| ENSG00000222482 | ENSG00000222482 | AC005071.1      | 7:9977518 | 34.744 | 0 | -1.79769e+ -1.79769e+ | 0 | 0     | yes | 34.7435    | 32.3795    | 37.1075    | 0 | 0 | 0 |
| ENSG00000222750 | ENSG00000222750 | U4              | 16:194218 | 4.629  | 0 | -1.79769e+ -1.79769e+ | 0 | 0     | yes | 4.62928    | 3.83243    | 5.42613    | 0 | 0 | 0 |
| ENSG00000223430 | ENSG00000223430 | AC011243.1      | 2:1334293 | 0.227  | 0 | -1.79769e+ -1.79769e+ | 0 | 0     | yes | 0.226719   | 0.193823   | 0.259615   | 0 | 0 | 0 |
| ENSG00000223522 | ENSG00000223522 | AC093690.1      | 2:2799458 | 0.039  | 0 | -1.79769e+ -1.79769e+ | 0 | 0     | yes | 0.0390225  | 0.0362971  | 0.041748   | 0 | 0 | 0 |
| ENSG00000223703 | ENSG00000223703 | AC027612.4      | 2:9192475 | 0.022  | 0 | -1.79769e+ -1.79769e+ | 0 | 0     | yes | 0.0224049  | 0.0173312  | 0.0274786  | 0 | 0 | 0 |
| ENSG00000223787 | ENSG00000223787 | RP4-593M8.1     | 1:9297425 | 0.195  | 0 | -1.79769e+ -1.79769e+ | 0 | 0     | yes | 0.194666   | 0.155135   | 0.234196   | 0 | 0 | 0 |
| ENSG00000223878 | ENSG00000223878 | AC005517.3      | 17:153393 | 0.113  | 0 | -1.79769e+ -1.79769e+ | 0 | 0     | yes | 0.112684   | 0.0893143  | 0.136053   | 0 | 0 | 0 |
| ENSG00000223998 | ENSG00000223998 | RP11-321N4.3    | 6:8621521 | 0.075  | 0 | -1.79769e+ -1.79769e+ | 0 | 0     | yes | 0.0749178  | 0.0711578  | 0.0786779  | 0 | 0 | 0 |
| ENSG00000224055 | ENSG00000224055 | GAPDHP55        | 15:441629 | 0.034  | 0 | -1.79769e+ -1.79769e+ | 0 | 0     | yes | 0.0342241  | 0.0295559  | 0.0388922  | 0 | 0 | 0 |
| ENSG00000224623 | ENSG00000224623 | RP11-247I13.8   | 22:317955 | 0.171  | 0 | -1.79769e+ -1.79769e+ | 0 | 0     | yes | 0.170588   | 0.165104   | 0.176073   | 0 | 0 | 0 |
| ENSG00000225133 | ENSG00000225133 | MORF4L1P4       | 13:417070 | 0.077  | 0 | -1.79769e+ -1.79769e+ | 0 | 0     | yes | 0.0765724  | 0.0692963  | 0.0838485  | 0 | 0 | 0 |
| ENSG00000225187 | ENSG00000225187 | AC073283.7      | 2:4712641 | 0.025  | 0 | -1.79769e+ -1.79769e+ | 0 | 0     | yes | 0.0254039  | 0.0241777  | 0.02663    | 0 | 0 | 0 |
| ENSG00000225205 | ENSG00000225205 | AC093818.1      | 2:1732920 | 0.039  | 0 | -1.79769e+ -1.79769e+ | 0 | 0     | yes | 0.0393961  | 0.0324045  | 0.0463878  | 0 | 0 | 0 |
| ENSG00000225839 | ENSG00000225839 | TRMT2B-AS1      | X:1002643 | 0.26   | 0 | -1.79769e+ -1.79769e+ | 0 | 0     | yes | 0.260069   | 0.23785    | 0.282288   | 0 | 0 | 0 |
| ENSG00000226054 | ENSG00000226054 | MEMO1P1         | 21:375026 | 0.118  | 0 | -1.79769e+ -1.79769e+ | 0 | 0     | yes | 0.117779   | 0.112214   | 0.123343   | 0 | 0 | 0 |
| ENSG00000226059 | ENSG00000226059 | HMGB3P20        | 7:2670668 | 0.141  | 0 | -1.79769e+ -1.79769e+ | 0 | 0     | yes | 0.140636   | 0.126412   | 0.154861   | 0 | 0 | 0 |
| ENSG00000226143 | ENSG00000226143 | RP1-138B7.5     | 20:421363 | 0.079  | 0 | -1.79769e+ -1.79769e+ | 0 | 0     | yes | 0.0790259  | 0.0557224  | 0.102329   | 0 | 0 | 0 |
| ENSG00000226784 | ENSG00000226784 | PGAM4           | X:7716619 | 0.023  | 0 | -1.79769e+ -1.79769e+ | 0 | 0     | yes | 0.0234246  | 0.0192343  | 0.0276149  | 0 | 0 | 0 |
| ENSG00000226953 | ENSG00000226953 | AC010890.1      | 2:1334293 | 0.177  | 0 | -1.79769e+ -1.79769e+ | 0 | 0     | yes | 0.177085   | 0.151386   | 0.202785   | 0 | 0 | 0 |
| ENSG00000226963 | ENSG00000226963 | AC078883.4      | 2:1732920 | 0.017  | 0 | -1.79769e+ -1.79769e+ | 0 | 0     | yes | 0.0166753  | 0.0137159  | 0.0196347  | 0 | 0 | 0 |
| ENSG00000227200 | ENSG00000227200 | RP11-121A14.3   | 9:1270198 | 0.004  | 0 | -1.79769e+ -1.79769e+ | 0 | 0     | yes | 0.00357693 | 0.00315093 | 0.00400294 | 0 | 0 | 0 |

|                 |                 |               |           |       |   |                       |   |       |     |             |            |             |   |   |   |
|-----------------|-----------------|---------------|-----------|-------|---|-----------------------|---|-------|-----|-------------|------------|-------------|---|---|---|
| ENSG00000227528 | ENSG00000227528 | DIAPH3-AS1    | 13:602397 | 0     | 0 | -1.79769e+ -1.79769e+ | 0 | 0     | yes | 0.000453266 | 0.00037282 | 0.000533707 | 0 | 0 | 0 |
| ENSG00000227589 | ENSG00000227589 | RP5-1092A11.5 | 1:3547330 | 0.068 | 0 | -1.79769e+ -1.79769e+ | 0 | 0     | yes | 0.0679361   | 0.063327   | 0.0725453   | 0 | 0 | 0 |
| ENSG00000228021 | ENSG00000228021 | RP11-383C5.3  | 10:127371 | 0.22  | 0 | -1.79769e+ -1.79769e+ | 0 | 0     | yes | 0.219771    | 0.193735   | 0.245807    | 0 | 0 | 0 |
| ENSG00000228595 | ENSG00000228595 | PAICSP2       | 9:9432537 | 0.035 | 0 | -1.79769e+ -1.79769e+ | 0 | 0     | yes | 0.0349044   | 0.0281871  | 0.0416218   | 0 | 0 | 0 |
| ENSG00000228838 | ENSG00000228838 | RP4-784A16.2  | 1:5371121 | 2.658 | 0 | -1.79769e+ -1.79769e+ | 0 | 0.003 | yes | 2.65804     | 1.19932    | 4.11675     | 0 | 0 | 0 |
| ENSG00000229534 | ENSG00000229534 | AC015691.7    | 11:527441 | 0.116 | 0 | -1.79769e+ -1.79769e+ | 0 | 0     | yes | 0.115895    | 0.0922379  | 0.139552    | 0 | 0 | 0 |
| ENSG00000229863 | ENSG00000229863 | RP11-157F20.1 | 3:5712400 | 0.207 | 0 | -1.79769e+ -1.79769e+ | 0 | 0     | yes | 0.206743    | 0.12996    | 0.283525    | 0 | 0 | 0 |
| ENSG00000230116 | ENSG00000230116 | RP11-163G10.2 | 1:4289599 | 0.053 | 0 | -1.79769e+ -1.79769e+ | 0 | 0     | yes | 0.0527514   | 0.0466703  | 0.0588325   | 0 | 0 | 0 |
| ENSG00000230194 | ENSG00000230194 | AC000081.2    | 22:191669 | 0.066 | 0 | -1.79769e+ -1.79769e+ | 0 | 0     | yes | 0.0655779   | 0.052717   | 0.0784388   | 0 | 0 | 0 |
| ENSG00000230340 | ENSG00000230340 | AC019257.1    | 8:1772141 | 0.062 | 0 | -1.79769e+ -1.79769e+ | 0 | 0     | yes | 0.0618594   | 0.0545692  | 0.0691495   | 0 | 0 | 0 |
| ENSG00000230698 | ENSG00000230698 | CTD-2330K9.2  | 3:4992443 | 0.115 | 0 | -1.79769e+ -1.79769e+ | 0 | 0     | yes | 0.11532     | 0.101682   | 0.128958    | 0 | 0 | 0 |
| ENSG00000230940 | ENSG00000230940 | RP11-32B11.2  | 9:1347354 | 0.397 | 0 | -1.79769e+ -1.79769e+ | 0 | 0     | yes | 0.397251    | 0.287073   | 0.507429    | 0 | 0 | 0 |
| ENSG00000230953 | ENSG00000230953 | RP4-631H13.6  | 1:5336165 | 0.733 | 0 | -1.79769e+ -1.79769e+ | 0 | 0     | yes | 0.732656    | 0.659844   | 0.805467    | 0 | 0 | 0 |
| ENSG00000231521 | ENSG00000231521 | RP11-244N9.4  | 9:1002634 | 1.06  | 0 | -1.79769e+ -1.79769e+ | 0 | 0     | yes | 1.06029     | 0.999802   | 1.12078     | 0 | 0 | 0 |
| ENSG00000231542 | ENSG00000231542 | TAB3-AS1      | X:3084555 | 1.636 | 0 | -1.79769e+ -1.79769e+ | 0 | 0     | yes | 1.63554     | 1.46217    | 1.8089      | 0 | 0 | 0 |
| ENSG00000231792 | ENSG00000231792 | RP5-1198E17.1 | 1:1738312 | 0.12  | 0 | -1.79769e+ -1.79769e+ | 0 | 0     | yes | 0.120466    | 0.101478   | 0.139454    | 0 | 0 | 0 |
| ENSG00000231882 | ENSG00000231882 | F10-AS1       | 13:113777 | 0.171 | 0 | -1.79769e+ -1.79769e+ | 0 | 0.001 | yes | 0.171405    | 0.0828921  | 0.259919    | 0 | 0 | 0 |
| ENSG00000231887 | ENSG00000231887 | PRH1          | 12:109775 | 0.11  | 0 | -1.79769e+ -1.79769e+ | 0 | 0     | yes | 0.10979     | 0.0908915  | 0.128688    | 0 | 0 | 0 |
| ENSG00000231942 | ENSG00000231942 | RP13-923O23.5 | 8:8270405 | 0.033 | 0 | -1.79769e+ -1.79769e+ | 0 | 0     | yes | 0.0325898   | 0.0217266  | 0.0434531   | 0 | 0 | 0 |
| ENSG00000231951 | ENSG00000231951 | AC004837.4    | 7:3960597 | 3.38  | 0 | -1.79769e+ -1.79769e+ | 0 | 0.003 | yes | 3.38026     | 1.50249    | 5.25803     | 0 | 0 | 0 |
| ENSG00000232371 | ENSG00000232371 | ZNF878        | 19:120984 | 1.609 | 0 | -1.79769e+ -1.79769e+ | 0 | 0     | yes | 1.60868     | 0.978736   | 2.23863     | 0 | 0 | 0 |
| ENSG00000232739 | ENSG00000232739 | RP11-25G10.2  | 10:152536 | 0.018 | 0 | -1.79769e+ -1.79769e+ | 0 | 0     | yes | 0.0178324   | 0.0131494  | 0.0225154   | 0 | 0 | 0 |
| ENSG00000232830 | ENSG00000232830 | RP11-144C15.1 | 3:1010430 | 0.258 | 0 | -1.79769e+ -1.79769e+ | 0 | 0     | yes | 0.257623    | 0.195532   | 0.319713    | 0 | 0 | 0 |
| ENSG00000232912 | ENSG00000232912 | RP5-1115A15.1 | 1:8412456 | 0.067 | 0 | -1.79769e+ -1.79769e+ | 0 | 0     | yes | 0.0670335   | 0.0641746  | 0.0698925   | 0 | 0 | 0 |
| ENSG00000233033 | ENSG00000233033 | CASK-AS1      | X:4137418 | 0.163 | 0 | -1.79769e+ -1.79769e+ | 0 | 0     | yes | 0.162899    | 0.146848   | 0.178949    | 0 | 0 | 0 |
| ENSG00000233246 | ENSG00000233246 | RP11-415J8.5  | 1:3378029 | 0.261 | 0 | -1.79769e+ -1.79769e+ | 0 | 0     | yes | 0.261326    | 0.240601   | 0.28205     | 0 | 0 | 0 |
| ENSG00000233579 | ENSG00000233579 | KRT8P15       | 2:2036406 | 0.068 | 0 | -1.79769e+ -1.79769e+ | 0 | 0     | yes | 0.0684329   | 0.057368   | 0.0794979   | 0 | 0 | 0 |
| ENSG00000233603 | ENSG00000233603 | JTBP1         | 22:411656 | 0.187 | 0 | -1.79769e+ -1.79769e+ | 0 | 0     | yes | 0.186725    | 0.161076   | 0.212374    | 0 | 0 | 0 |
| ENSG00000233793 | ENSG00000233793 | RP11-501H19.4 | X:2773419 | 7.912 | 0 | -1.79769e+ -1.79769e+ | 0 | 0.001 | yes | 7.9119      | 3.76568    | 12.0581     | 0 | 0 | 0 |
| ENSG00000234076 | ENSG00000234076 | TPRG1-AS1     | 3:1886595 | 0.074 | 0 | -1.79769e+ -1.79769e+ | 0 | 0     | yes | 0.0739971   | 0.0516861  | 0.0963081   | 0 | 0 | 0 |
| ENSG00000234271 | ENSG00000234271 | RP1-138B7.4   | 20:421363 | 0.578 | 0 | -1.79769e+ -1.79769e+ | 0 | 0     | yes | 0.578018    | 0.40757    | 0.748467    | 0 | 0 | 0 |
| ENSG00000234324 | ENSG00000234324 | AC005517.2    | 17:153393 | 0.073 | 0 | -1.79769e+ -1.79769e+ | 0 | 0     | yes | 0.0733416   | 0.0581313  | 0.0885519   | 0 | 0 | 0 |
| ENSG00000234336 | ENSG00000234336 | AC005017.1    | 7:2777301 | 0.049 | 0 | -1.79769e+ -1.79769e+ | 0 | 0     | yes | 0.0494904   | 0.0464743  | 0.0525065   | 0 | 0 | 0 |
| ENSG00000234483 | ENSG00000234483 | AC010680.1    | 2:1793875 | 0.005 | 0 | -1.79769e+ -1.79769e+ | 0 | 0     | yes | 0.00496976  | 0.00412057 | 0.00581895  | 0 | 0 | 0 |
| ENSG00000234650 | ENSG00000234650 | PCCA-AS1      | 13:100741 | 0.294 | 0 | -1.79769e+ -1.79769e+ | 0 | 0     | yes | 0.294356    | 0.238144   | 0.350569    | 0 | 0 | 0 |
| ENSG00000235105 | ENSG00000235105 | RP11-329A14.1 | 1:4876104 | 0.016 | 0 | -1.79769e+ -1.79769e+ | 0 | 0     | yes | 0.0155009   | 0.0116556  | 0.0193463   | 0 | 0 | 0 |
| ENSG00000235652 | ENSG00000235652 | RP11-545I5.3  | 6:1461363 | 0.173 | 0 | -1.79769e+ -1.79769e+ | 0 | 0     | yes | 0.172644    | 0.146316   | 0.198971    | 0 | 0 | 0 |
| ENSG00000235763 | ENSG00000235763 | SNRPGP5       | 10:129386 | 0.529 | 0 | -1.79769e+ -1.79769e+ | 0 | 0     | yes | 0.529468    | 0.477424   | 0.581512    | 0 | 0 | 0 |
| ENSG00000236132 | ENSG00000236132 | CTA-440B3.1   | 22:321499 | 0.134 | 0 | -1.79769e+ -1.79769e+ | 0 | 0     | yes | 0.133632    | 0.119585   | 0.147679    | 0 | 0 | 0 |
| ENSG00000236256 | ENSG00000236256 | DIAPH2-AS1    | X:9593966 | 0.114 | 0 | -1.79769e+ -1.79769e+ | 0 | 0     | yes | 0.113508    | 0.0978028  | 0.129212    | 0 | 0 | 0 |
| ENSG00000236439 | ENSG00000236439 | RP11-175B9.3  | 1:2023178 | 0.214 | 0 | -1.79769e+ -1.79769e+ | 0 | 0     | yes | 0.213925    | 0.194753   | 0.233097    | 0 | 0 | 0 |
| ENSG00000236472 | ENSG00000236472 | AC002401.1    | 17:482111 | 4.559 | 0 | -1.79769e+ -1.79769e+ | 0 | 0.003 | yes | 4.5586      | 2.0112     | 7.10599     | 0 | 0 | 0 |
| ENSG00000236474 | ENSG00000236474 | GCNT1P1       | 20:183640 | 0.02  | 0 | -1.79769e+ -1.79769e+ | 0 | 0     | yes | 0.0201791   | 0.0172039  | 0.0231544   | 0 | 0 | 0 |
| ENSG00000236546 | ENSG00000236546 | RP1-118J21.5  | 1:4036109 | 0.034 | 0 | -1.79769e+ -1.79769e+ | 0 | 0     | yes | 0.0343344   | 0.0234769  | 0.0451918   | 0 | 0 | 0 |
| ENSG00000237380 | ENSG00000237380 | AC009336.21   | 2:1769863 | 0.006 | 0 | -1.79769e+ -1.79769e+ | 0 | 0     | yes | 0.00578445  | 0.00455802 | 0.00701089  | 0 | 0 | 0 |
| ENSG00000237416 | ENSG00000237416 | RP11-465K1.2  | 1:9528589 | 0.149 | 0 | -1.79769e+ -1.79769e+ | 0 | 0     | yes | 0.149225    | 0.114521   | 0.183929    | 0 | 0 | 0 |
| ENSG00000237806 | ENSG00000237806 | RP11-262M14.1 | 3:1807014 | 0.339 | 0 | -1.79769e+ -1.79769e+ | 0 | 0     | yes | 0.339071    | 0.242194   | 0.435948    | 0 | 0 | 0 |
| ENSG00000237813 | ENSG00000237813 | AC002066.1    | 7:1158505 | 0.097 | 0 | -1.79769e+ -1.79769e+ | 0 | 0     | yes | 0.0972139   | 0.0880546  | 0.106373    | 0 | 0 | 0 |
| ENSG00000237916 | ENSG00000237916 | RP11-537E18.1 | 2:1103003 | 0.322 | 0 | -1.79769e+ -1.79769e+ | 0 | 0     | yes | 0.321677    | 0.245325   | 0.39803     | 0 | 0 | 0 |
| ENSG00000237996 | ENSG00000237996 | RP11-258A12.3 | 10:114710 | 0.015 | 0 | -1.79769e+ -1.79769e+ | 0 | 0     | yes | 0.0151051   | 0.0135574  | 0.0166528   | 0 | 0 | 0 |

|                 |                 |               |           |         |   |                       |   |       |     |             |            |             |   |   |   |
|-----------------|-----------------|---------------|-----------|---------|---|-----------------------|---|-------|-----|-------------|------------|-------------|---|---|---|
| ENSG00000238111 | ENSG00000238111 | AC066692.3    | 2:2397153 | 0.015   | 0 | -1.79769e+ -1.79769e+ | 0 | 0     | yes | 0.0154858   | 0.0138489  | 0.0171227   | 0 | 0 | 0 |
| ENSG00000238298 | ENSG00000238298 | snoU13        | 9:1333200 | 35.545  | 0 | -1.79769e+ -1.79769e+ | 0 | 0     | yes | 35.5452     | 23.3533    | 47.7371     | 0 | 0 | 0 |
| ENSG00000238567 | ENSG00000238567 | snoU13        | 2:1718473 | 11.858  | 0 | -1.79769e+ -1.79769e+ | 0 | 0     | yes | 11.8577     | 10.7786    | 12.9368     | 0 | 0 | 0 |
| ENSG00000238868 | ENSG00000238868 | snoU13        | 7:1399934 | 1.959   | 0 | -1.79769e+ -1.79769e+ | 0 | 0     | yes | 1.9586      | 1.75658    | 2.16061     | 0 | 0 | 0 |
| ENSG00000238924 | ENSG00000238924 | U7            | 10:103433 | 186.086 | 0 | -1.79769e+ -1.79769e+ | 0 | 0     | yes | 186.086     | 177.37     | 194.803     | 0 | 0 | 0 |
| ENSG00000239344 | ENSG00000239344 | RP11-771F20.1 | 8:1044956 | 0.131   | 0 | -1.79769e+ -1.79769e+ | 0 | 0     | yes | 0.130609    | 0.118521   | 0.142696    | 0 | 0 | 0 |
| ENSG00000239783 | ENSG00000239783 | RP5-1050K3.3  | 20:455232 | 0.093   | 0 | -1.79769e+ -1.79769e+ | 0 | 0     | yes | 0.0933234   | 0.0845052  | 0.102142    | 0 | 0 | 0 |
| ENSG00000240695 | ENSG00000240695 | RP11-102M11.1 | 3:1359691 | 0.159   | 0 | -1.79769e+ -1.79769e+ | 0 | 0     | yes | 0.158773    | 0.152074   | 0.165472    | 0 | 0 | 0 |
| ENSG00000240766 | ENSG00000240766 | PLCXD2-AS1    | 3:1113935 | 0.007   | 0 | -1.79769e+ -1.79769e+ | 0 | 0     | yes | 0.00740083  | 0.00534821 | 0.00945346  | 0 | 0 | 0 |
| ENSG00000241420 | ENSG00000241420 | AC074338.1    | 7:3253503 | 0.171   | 0 | -1.79769e+ -1.79769e+ | 0 | 0     | yes | 0.170921    | 0.165279   | 0.176562    | 0 | 0 | 0 |
| ENSG00000241550 | ENSG00000241550 | AC104212.1    | 8:8083095 | 0.206   | 0 | -1.79769e+ -1.79769e+ | 0 | 0     | yes | 0.205663    | 0.192524   | 0.218803    | 0 | 0 | 0 |
| ENSG00000241651 | ENSG00000241651 | RP11-214O14.1 | 4:1289824 | 0.057   | 0 | -1.79769e+ -1.79769e+ | 0 | 0     | yes | 0.0573459   | 0.0475112  | 0.0671807   | 0 | 0 | 0 |
| ENSG00000241853 | ENSG00000241853 | RP11-147K6.1  | 4:8901141 | 0.433   | 0 | -1.79769e+ -1.79769e+ | 0 | 0     | yes | 0.432756    | 0.37303    | 0.492482    | 0 | 0 | 0 |
| ENSG00000241895 | ENSG00000241895 | AL157827.2    | 9:9505963 | 48.322  | 0 | -1.79769e+ -1.79769e+ | 0 | 0     | yes | 48.3224     | 44.7055    | 51.9392     | 0 | 0 | 0 |
| ENSG00000242094 | ENSG00000242094 | FOXP1-IT1     | 3:7100384 | 0.018   | 0 | -1.79769e+ -1.79769e+ | 0 | 0     | yes | 0.01834     | 0.0168104  | 0.0198697   | 0 | 0 | 0 |
| ENSG00000242180 | ENSG00000242180 | OR51B5        | 11:527441 | 0.029   | 0 | -1.79769e+ -1.79769e+ | 0 | 0     | yes | 0.0294162   | 0.0234117  | 0.0354208   | 0 | 0 | 0 |
| ENSG00000242219 | ENSG00000242219 | AC011442.1    | 19:110715 | 0.544   | 0 | -1.79769e+ -1.79769e+ | 0 | 0     | yes | 0.543618    | 0.53001    | 0.557225    | 0 | 0 | 0 |
| ENSG00000242719 | ENSG00000242719 | AC009634.1    | 8:4270477 | 1.199   | 0 | -1.79769e+ -1.79769e+ | 0 | 0     | yes | 1.19883     | 1.03755    | 1.36011     | 0 | 0 | 0 |
| ENSG00000242761 | ENSG00000242761 | RP11-115P21.1 | 18:320732 | 0.04    | 0 | -1.79769e+ -1.79769e+ | 0 | 0     | yes | 0.0403414   | 0.0367687  | 0.0439141   | 0 | 0 | 0 |
| ENSG00000243243 | ENSG00000243243 | AC073130.3    | 7:1158505 | 0.084   | 0 | -1.79769e+ -1.79769e+ | 0 | 0     | yes | 0.0843188   | 0.0763761  | 0.0922614   | 0 | 0 | 0 |
| ENSG00000243341 | ENSG00000243341 | RP11-436A20.3 | 3:1807014 | 0.128   | 0 | -1.79769e+ -1.79769e+ | 0 | 0     | yes | 0.12763     | 0.0911645  | 0.164096    | 0 | 0 | 0 |
| ENSG00000243806 | ENSG00000243806 | CTC-484P3.1   | 5:9348867 | 0.153   | 0 | -1.79769e+ -1.79769e+ | 0 | 0     | yes | 0.153232    | 0.130131   | 0.176332    | 0 | 0 | 0 |
| ENSG00000244052 | ENSG00000244052 | RPL5P24       | 8:1038385 | 0.119   | 0 | -1.79769e+ -1.79769e+ | 0 | 0     | yes | 0.11915     | 0.113554   | 0.124747    | 0 | 0 | 0 |
| ENSG00000244307 | ENSG00000244307 | AF235103.1    | 8:1459976 | 0.015   | 0 | -1.79769e+ -1.79769e+ | 0 | 0     | yes | 0.0146098   | 0.0113223  | 0.0178973   | 0 | 0 | 0 |
| ENSG00000244604 | ENSG00000244604 | RP11-713H12.1 | 17:833917 | 0.17    | 0 | -1.79769e+ -1.79769e+ | 0 | 0     | yes | 0.170453    | 0.162083   | 0.178823    | 0 | 0 | 0 |
| ENSG00000245043 | ENSG00000245043 | AC073210.1    | 7:6449873 | 0.066   | 0 | -1.79769e+ -1.79769e+ | 0 | 0.005 | yes | 0.0663407   | 0.0280389  | 0.104642    | 0 | 0 | 0 |
| ENSG00000245148 | ENSG00000245148 | ARAP1-AS2     | 11:723961 | 0.056   | 0 | -1.79769e+ -1.79769e+ | 0 | 0     | yes | 0.0556607   | 0.0546498  | 0.0566716   | 0 | 0 | 0 |
| ENSG00000245521 | ENSG00000245521 | AL139082.1    | 13:526110 | 0.012   | 0 | -1.79769e+ -1.79769e+ | 0 | 0     | yes | 0.0116539   | 0.00944161 | 0.0138662   | 0 | 0 | 0 |
| ENSG00000247872 | ENSG00000247872 | CTD-2198K18.1 | 5:710470  | 0.112   | 0 | -1.79769e+ -1.79769e+ | 0 | 0     | yes | 0.112229    | 0.103425   | 0.121033    | 0 | 0 | 0 |
| ENSG00000248245 | ENSG00000248245 | CTB-49A3.2    | 5:1324961 | 0.033   | 0 | -1.79769e+ -1.79769e+ | 0 | 0     | yes | 0.0326669   | 0.0214619  | 0.0438719   | 0 | 0 | 0 |
| ENSG00000248394 | ENSG00000248394 | CTD-2034L19.1 | 4:1289824 | 0.061   | 0 | -1.79769e+ -1.79769e+ | 0 | 0     | yes | 0.0614806   | 0.0509368  | 0.0720245   | 0 | 0 | 0 |
| ENSG00000248470 | ENSG00000248470 | AL356752.1    | 13:113344 | 0.005   | 0 | -1.79769e+ -1.79769e+ | 0 | 0     | yes | 0.00492642  | 0.00460523 | 0.00524762  | 0 | 0 | 0 |
| ENSG00000248476 | ENSG00000248476 | BACH1-IT1     | 21:305658 | 0.048   | 0 | -1.79769e+ -1.79769e+ | 0 | 0     | yes | 0.0481149   | 0.0401509  | 0.056079    | 0 | 0 | 0 |
| ENSG00000248492 | ENSG00000248492 | AC015599.1    | 8:1354900 | 0       | 0 | -1.79769e+ -1.79769e+ | 0 | 0     | yes | 0.000260489 | 0.00022907 | 0.000291905 | 0 | 0 | 0 |
| ENSG00000248636 | ENSG00000248636 | RP11-768F21.1 | 12:119772 | 0.214   | 0 | -1.79769e+ -1.79769e+ | 0 | 0     | yes | 0.214343    | 0.197617   | 0.231068    | 0 | 0 | 0 |
| ENSG00000248820 | ENSG00000248820 | RP11-15B17.3  | 4:1008692 | 0.529   | 0 | -1.79769e+ -1.79769e+ | 0 | 0     | yes | 0.529344    | 0.498326   | 0.560361    | 0 | 0 | 0 |
| ENSG00000249098 | ENSG00000249098 | RP11-39E3.4   | 3:1305694 | 0.183   | 0 | -1.79769e+ -1.79769e+ | 0 | 0     | yes | 0.183378    | 0.173344   | 0.193412    | 0 | 0 | 0 |
| ENSG00000249310 | ENSG00000249310 | CTA-150C2.16  | 22:393783 | 0.186   | 0 | -1.79769e+ -1.79769e+ | 0 | 0     | yes | 0.1856      | 0.132022   | 0.239178    | 0 | 0 | 0 |
| ENSG00000249633 | ENSG00000249633 | OR52V1P       | 11:527441 | 0.115   | 0 | -1.79769e+ -1.79769e+ | 0 | 0     | yes | 0.114996    | 0.0915227  | 0.13847     | 0 | 0 | 0 |
| ENSG00000249715 | ENSG00000249715 | AC068539.1    | 2:9725890 | 0.011   | 0 | -1.79769e+ -1.79769e+ | 0 | 0     | yes | 0.0114105   | 0.0107228  | 0.0120983   | 0 | 0 | 0 |
| ENSG00000250068 | ENSG00000250068 | RP11-576C12.1 | 9:1151422 | 0.438   | 0 | -1.79769e+ -1.79769e+ | 0 | 0     | yes | 0.437991    | 0.396789   | 0.479194    | 0 | 0 | 0 |
| ENSG00000250174 | ENSG00000250174 | MYLK-AS2      | 3:1233043 | 0.058   | 0 | -1.79769e+ -1.79769e+ | 0 | 0     | yes | 0.0576117   | 0.0439346  | 0.0712888   | 0 | 0 | 0 |
| ENSG00000250487 | ENSG00000250487 | RP11-43D2.6   | 5:1239726 | 0.236   | 0 | -1.79769e+ -1.79769e+ | 0 | 0     | yes | 0.23647     | 0.161692   | 0.311248    | 0 | 0 | 0 |
| ENSG00000250623 | ENSG00000250623 | RP11-317B7.3  | 4:2073644 | 0.037   | 0 | -1.79769e+ -1.79769e+ | 0 | 0     | yes | 0.0367498   | 0.0319855  | 0.041514    | 0 | 0 | 0 |
| ENSG00000250697 | ENSG00000250697 | CTD-2066L21.3 | 5:3292574 | 11.434  | 0 | -1.79769e+ -1.79769e+ | 0 | 0     | yes | 11.4335     | 6.0355     | 16.8315     | 0 | 0 | 0 |
| ENSG00000250780 | ENSG00000250780 | AL356423.1    | 13:991024 | 0.027   | 0 | -1.79769e+ -1.79769e+ | 0 | 0     | yes | 0.0271327   | 0.0248658  | 0.0293997   | 0 | 0 | 0 |
| ENSG00000250963 | ENSG00000250963 | RP11-423H2.2  | 5:1772364 | 0.003   | 0 | -1.79769e+ -1.79769e+ | 0 | 0     | yes | 0.00322967  | 0.00249829 | 0.00396104  | 0 | 0 | 0 |
| ENSG00000251018 | ENSG00000251018 | RP11-80G7.1   | 5:1628871 | 0.059   | 0 | -1.79769e+ -1.79769e+ | 0 | 0     | yes | 0.0594993   | 0.0525469  | 0.0664516   | 0 | 0 | 0 |
| ENSG00000251095 | ENSG00000251095 | RP11-115D19.1 | 4:9047250 | 0.061   | 0 | -1.79769e+ -1.79769e+ | 0 | 0     | yes | 0.0608597   | 0.0366994  | 0.08502     | 0 | 0 | 0 |
| ENSG00000251131 | ENSG00000251131 | CTD-2035E11.3 | 5:4301451 | 0.536   | 0 | -1.79769e+ -1.79769e+ | 0 | 0     | yes | 0.536257    | 0.484619   | 0.587896    | 0 | 0 | 0 |

|                 |                 |               |           |        |       |            |            |       |       |     |            |            |            |            |          |          |
|-----------------|-----------------|---------------|-----------|--------|-------|------------|------------|-------|-------|-----|------------|------------|------------|------------|----------|----------|
| ENSG00000251154 | ENSG00000251154 | AC006153.3    | 7:8996453 | 0.339  | 0     | -1.79769e+ | -1.79769e+ | 0     | 0     | yes | 0.339307   | 0.315463   | 0.363151   | 0          | 0        | 0        |
| ENSG00000252494 | ENSG00000252494 | U6            | 11:778119 | 19.626 | 0     | -1.79769e+ | -1.79769e+ | 0     | 0     | yes | 19.6263    | 17.7486    | 21.504     | 0          | 0        | 0        |
| ENSG00000252974 | ENSG00000252974 | AC121334.1    | 12:396870 | 92.337 | 0     | -1.79769e+ | -1.79769e+ | 0     | 0     | yes | 92.3373    | 84.3828    | 100.292    | 0          | 0        | 0        |
| ENSG00000253172 | ENSG00000253172 | CTC-209H22.3  | 5:1725711 | 0.136  | 0     | -1.79769e+ | -1.79769e+ | 0     | 0     | yes | 0.136343   | 0.120805   | 0.151881   | 0          | 0        | 0        |
| ENSG00000253174 | ENSG00000253174 | RP11-360L9.7  | 8:4138672 | 0.241  | 0     | -1.79769e+ | -1.79769e+ | 0     | 0     | yes | 0.240838   | 0.225959   | 0.255717   | 0          | 0        | 0        |
| ENSG00000253302 | ENSG00000253302 | RP11-181D18.2 | 8:7433223 | 0.003  | 0     | -1.79769e+ | -1.79769e+ | 0     | 0     | yes | 0.0026705  | 0.00232717 | 0.00301383 | 0          | 0        | 0        |
| ENSG00000253406 | ENSG00000253406 | AC012613.2    | 5:1485210 | 0.009  | 0     | -1.79769e+ | -1.79769e+ | 0     | 0     | yes | 0.00904555 | 0.00818113 | 0.00990998 | 0          | 0        | 0        |
| ENSG00000253518 | ENSG00000253518 | CTD-2031P19.4 | 5:5523092 | 0.072  | 0     | -1.79769e+ | -1.79769e+ | 0     | 0     | yes | 0.0716044  | 0.0628237  | 0.0803851  | 0          | 0        | 0        |
| ENSG00000253528 | ENSG00000253528 | RP11-347C18.4 | 8:9582553 | 0.418  | 0     | -1.79769e+ | -1.79769e+ | 0     | 0     | yes | 0.417953   | 0.400992   | 0.434914   | 0          | 0        | 0        |
| ENSG00000254460 | ENSG00000254460 | RP11-939C17.4 | 11:751456 | 0.065  | 0     | -1.79769e+ | -1.79769e+ | 0     | 0     | yes | 0.0648234  | 0.0501438  | 0.079503   | 0          | 0        | 0        |
| ENSG00000254633 | ENSG00000254633 | RP11-23J9.7   | 9:1000000 | 0.039  | 0     | -1.79769e+ | -1.79769e+ | 0     | 0     | yes | 0.0389954  | 0.031157   | 0.0468338  | 0          | 0        | 0        |
| ENSG00000254788 | ENSG00000254788 | CKLF-CMTM1    | 16:665864 | 24.754 | 0     | -1.79769e+ | -1.79769e+ | 0     | 0     | yes | 24.7541    | 18.968     | 30.5402    | 0          | 0        | 0        |
| ENSG00000255010 | ENSG00000255010 | RP11-113K21.3 | 11:827831 | 0.398  | 0     | -1.79769e+ | -1.79769e+ | 0     | 0     | yes | 0.397803   | 0.281752   | 0.513855   | 0          | 0        | 0        |
| ENSG00000255158 | ENSG00000255158 | RP11-754B17.1 | 11:644232 | 0.053  | 0     | -1.79769e+ | -1.79769e+ | 0     | 0     | yes | 0.0531152  | 0.0511948  | 0.0550356  | 0          | 0        | 0        |
| ENSG00000255276 | ENSG00000255276 | RP11-23F23.1  | 11:411593 | 0.638  | 0     | -1.79769e+ | -1.79769e+ | 0     | 0     | yes | 0.638439   | 0.602637   | 0.674241   | 0          | 0        | 0        |
| ENSG00000255478 | ENSG00000255478 | RP11-867O8.5  | 11:651349 | 0.126  | 0     | -1.79769e+ | -1.79769e+ | 0     | 0     | yes | 0.126292   | 0.104791   | 0.147794   | 0          | 0        | 0        |
| ENSG00000255581 | ENSG00000255581 | RP11-69M1.4   | 12:791781 | 0.158  | 0     | -1.79769e+ | -1.79769e+ | 0     | 0     | yes | 0.15786    | 0.145919   | 0.169802   | 0          | 0        | 0        |
| ENSG00000255723 | ENSG00000255723 | RP11-529H2.2  | 4:8822494 | 0.198  | 0     | -1.79769e+ | -1.79769e+ | 0     | 0     | yes | 0.197576   | 0.133474   | 0.261679   | 0          | 0        | 0        |
| ENSG00000255958 | ENSG00000255958 | RP11-656E20.5 | 12:103650 | 0.024  | 0     | -1.79769e+ | -1.79769e+ | 0     | 0     | yes | 0.0243083  | 0.0152804  | 0.0333362  | 0          | 0        | 0        |
| ENSG00000255990 | ENSG00000255990 | AC034102.1    | 12:563676 | 0.643  | 0     | -1.79769e+ | -1.79769e+ | 0     | 0.001 | yes | 0.643244   | 0.316183   | 0.970305   | 0          | 0        | 0        |
| ENSG00000256278 | ENSG00000256278 | RP11-182J1.5  | 15:851426 | 0.091  | 0     | -1.79769e+ | -1.79769e+ | 0     | 0     | yes | 0.0911565  | 0.07038    | 0.111933   | 0          | 0        | 0        |
| ENSG00000256329 | ENSG00000256329 | AC006064.2    | 12:660114 | 0.898  | 0     | -1.79769e+ | -1.79769e+ | 0     | 0     | yes | 0.898272   | 0.855916   | 0.940629   | 0          | 0        | 0        |
| ENSG00000256650 | ENSG00000256650 | RERG-IT1      | 12:152607 | 0.488  | 0     | -1.79769e+ | -1.79769e+ | 0     | 0     | yes | 0.487898   | 0.4253     | 0.550495   | 0          | 0        | 0        |
| ENSG00000256757 | ENSG00000256757 | RP11-159N11.3 | 11:113276 | 0.196  | 0     | -1.79769e+ | -1.79769e+ | 0     | 0     | yes | 0.195803   | 0.124306   | 0.2673     | 0          | 0        | 0        |
| ENSG00000256813 | ENSG00000256813 | RP11-804A23.4 | 11:606034 | 4.485  | 0     | -1.79769e+ | -1.79769e+ | 0     | 0.002 | yes | 4.48531    | 2.06111    | 6.90951    | 0          | 0        | 0        |
| ENSG00000256898 | ENSG00000256898 | RP11-707G14.8 | 11:735837 | 0.068  | 0     | -1.79769e+ | -1.79769e+ | 0     | 0     | yes | 0.0675429  | 0.0635029  | 0.071583   | 0          | 0        | 0        |
| ENSG00000257077 | ENSG00000257077 | RP11-467L20.6 | 11:614479 | 2.961  | 0     | -1.79769e+ | -1.79769e+ | 0     | 0     | yes | 2.96145    | 1.55389    | 4.369      | 0          | 0        | 0        |
| ENSG00000257241 | ENSG00000257241 | RP11-611E13.3 | 12:701324 | 0.264  | 0     | -1.79769e+ | -1.79769e+ | 0     | 0     | yes | 0.263757   | 0.251526   | 0.275989   | 0          | 0        | 0        |
| ENSG00000257355 | ENSG00000257355 | CTD-2006C1.10 | 19:120984 | 0.007  | 0     | -1.79769e+ | -1.79769e+ | 0     | 0     | yes | 0.00708522 | 0.00515687 | 0.00901357 | 0          | 0        | 0        |
| ENSG00000257446 | ENSG00000257446 | AC022415.4    | 19:120984 | 1.611  | 0     | -1.79769e+ | -1.79769e+ | 0     | 0     | yes | 1.61128    | 0.98021    | 2.24235    | 0          | 0        | 0        |
| ENSG00000257613 | ENSG00000257613 | RP11-320P7.1  | 12:701324 | 0.044  | 0     | -1.79769e+ | -1.79769e+ | 0     | 0     | yes | 0.0439745  | 0.0419352  | 0.0460137  | 0          | 0        | 0        |
| ENSG00000258011 | ENSG00000258011 | HMGA1P3       | 12:110810 | 0.137  | 0     | -1.79769e+ | -1.79769e+ | 0     | 0     | yes | 0.136759   | 0.129734   | 0.143784   | 0          | 0        | 0        |
| ENSG00000258571 | ENSG00000258571 | PTTG4P        | 14:713741 | 0.563  | 0     | -1.79769e+ | -1.79769e+ | 0     | 0     | yes | 0.562929   | 0.528952   | 0.596906   | 0          | 0        | 0        |
| ENSG00000258653 | ENSG00000258653 | RP5-1021I20.4 | 14:743185 | 0.391  | 0     | -1.79769e+ | -1.79769e+ | 0     | 0.002 | yes | 0.391244   | 0.185322   | 0.597166   | 0          | 0        | 0        |
| ENSG00000258830 | ENSG00000258830 | RP11-123K3.4  | 12:576372 | 0.563  | 0     | -1.79769e+ | -1.79769e+ | 0     | 0.007 | yes | 0.563133   | 0.228568   | 0.897697   | 0          | 0        | 0        |
| ENSG00000258966 | ENSG00000258966 | RP5-1163L11.3 | 14:713741 | 0.119  | 0     | -1.79769e+ | -1.79769e+ | 0     | 0     | yes | 0.119113   | 0.111924   | 0.126303   | 0          | 0        | 0        |
| ENSG00000259014 | ENSG00000259014 | RP4-647C14.5  | 14:737418 | 0.024  | 0     | -1.79769e+ | -1.79769e+ | 0     | 0     | yes | 0.0238332  | 0.0224115  | 0.025255   | 0          | 0        | 0        |
| ENSG00000259118 | ENSG00000259118 | RP11-840I19.3 | 14:653810 | 0.052  | 0     | -1.79769e+ | -1.79769e+ | 0     | 0     | yes | 0.0520726  | 0.0505465  | 0.0535987  | 0          | 0        | 0        |
| ENSG00000128645 | ENSG00000128645 | HOXD1         | 2:1769863 | 0.091  | 0.007 | -2.546     | 3.309      | 0.001 | 0.015 | yes | 0.091424   | 0          | 0.230928   | 0.00716936 | 0.005743 | 0.008596 |
| ENSG00000214274 | ENSG00000214274 | ANG           | 14:211522 | 27.75  | 2.566 | -2.381     | 3.215      | 0.001 | 0.02  | yes | 27.7502    | 0          | 67.0814    | 2.56627    | 1.46159  | 3.67095  |
| ENSG00000250234 | ENSG00000250234 | CTD-2024P10.1 | 5:3465634 | 0.961  | 0.094 | -2.33      | 3.34       | 0.001 | 0.014 | yes | 0.961335   | 0          | 2.29373    | 0.0935134  | 0.078293 | 0.108733 |
| ENSG00000249823 | ENSG00000249823 | RP11-311D14.2 | 4:1064737 | 1.113  | 0.158 | -1.954     | 3.347      | 0.001 | 0.014 | yes | 1.11323    | 0          | 2.41174    | 0.157813   | 0.150634 | 0.164992 |
| ENSG00000251467 | ENSG00000251467 | CTC-250P20.2  | 5:7225180 | 0.621  | 0.093 | -1.894     | 3.473      | 0.001 | 0.009 | yes | 0.621435   | 0          | 1.29348    | 0.0934609  | 0.080075 | 0.106847 |
| ENSG00000256690 | ENSG00000256690 | RP11-727F15.9 | 11:625997 | 6.394  | 1.077 | -1.781     | 3.177      | 0.001 | 0.023 | yes | 6.39442    | 3.79148    | 8.99736    | 1.0769     | 0        | 2.20216  |
| ENSG00000253502 | ENSG00000253502 | ATP6V1G1P2    | 8:4800119 | 3.563  | 0.601 | -1.779     | 3.279      | 0.001 | 0.017 | yes | 3.56273    | 0.511492   | 6.61398    | 0.601327   | 0.200442 | 1.00221  |
| ENSG00000253773 | ENSG00000253773 | KB-1047C11.2  | 8:9621668 | 9.601  | 1.682 | -1.742     | 3.39       | 0.001 | 0.012 | yes | 9.60091    | 6.01322    | 13.1886    | 1.68177    | 0.071662 | 3.29188  |
| ENSG00000250900 | ENSG00000250900 | CTC-338M12.6  | 5:1806189 | 17.277 | 3.072 | -1.727     | 3.287      | 0.001 | 0.016 | yes | 17.2769    | 13.1595    | 21.3942    | 3.07197    | 0        | 6.21613  |
| ENSG00000236404 | ENSG00000236404 | RP11-125B21.2 | 9:2422701 | 8.686  | 1.666 | -1.651     | 3.332      | 0.001 | 0.014 | yes | 8.68645    | 6.36271    | 11.0102    | 1.66634    | 0.076157 | 3.25652  |
| ENSG00000257851 | ENSG00000257851 | RP11-199A1.1  | 12:519840 | 0.455  | 0.087 | -1.651     | 3.389      | 0.001 | 0.012 | yes | 0.454986   | 0.0259608  | 0.884012   | 0.0873091  | 0.065976 | 0.108642 |
| ENSG00000092529 | ENSG00000092529 | CAPN3         | 15:425664 | 2.491  | 0.489 | -1.629     | 3.446      | 0.001 | 0.01  | yes | 2.49108    | 1.13069    | 3.85146    | 0.488681   | 0.111638 | 0.865724 |

|                 |                 |               |            |         |        |        |       |       |       |     |           |           |           |           |          |          |
|-----------------|-----------------|---------------|------------|---------|--------|--------|-------|-------|-------|-----|-----------|-----------|-----------|-----------|----------|----------|
| ENSG00000244078 | ENSG00000244078 | RP11-431I8.1  | 3:1599434. | 2.063   | 0.442  | -1.541 | 3.384 | 0.001 | 0.012 | yes | 2.06284   | 0.187111  | 3.93856   | 0.441675  | 0.418674 | 0.464675 |
| ENSG00000188001 | ENSG00000188001 | TPRG1         | 3:1886595i | 5.825   | 1.263  | -1.529 | 3.414 | 0.001 | 0.011 | yes | 5.82502   | 3.39949   | 8.25055   | 1.26296   | 0.261598 | 2.26433  |
| ENSG00000258559 | ENSG00000258559 | AC005519.4    | 14:747521. | 2.333   | 0.584  | -1.385 | 3.186 | 0.001 | 0.022 | yes | 2.33307   | 1.46189   | 3.20426   | 0.583922  | 0.125382 | 1.04246  |
| ENSG00000232630 | ENSG00000232630 | PRPS1P2       | 9:1279088. | 3.976   | 1.048  | -1.333 | 3.248 | 0.001 | 0.018 | yes | 3.97586   | 2.54468   | 5.40703   | 1.04846   | 0.275232 | 1.82169  |
| ENSG00000182993 | ENSG00000182993 | C12orf60      | 12:149565i | 6.368   | 1.775  | -1.277 | 3.405 | 0.001 | 0.011 | yes | 6.36782   | 4.20394   | 8.5317    | 1.77511   | 0.587462 | 2.96275  |
| ENSG00000122012 | ENSG00000122012 | SV2C          | 5:7537777i | 0.053   | 0.015  | -1.237 | 3.278 | 0.001 | 0.017 | yes | 0.0525188 | 0.0172024 | 0.0878353 | 0.015242  | 0.010013 | 0.020471 |
| ENSG00000109189 | ENSG00000109189 | USP46         | 4:5346033i | 14.124  | 5.046  | -1.029 | 3.276 | 0.001 | 0.017 | yes | 14.124    | 8.10048   | 20.1475   | 5.04638   | 2.71755  | 7.37521  |
| ENSG00000129535 | ENSG00000129535 | NRL           | 14:245493  | 4.92    | 1.793  | -1.009 | 3.445 | 0.001 | 0.01  | yes | 4.9201    | 3.40095   | 6.43926   | 1.79326   | 0.900193 | 2.68633  |
| ENSG00000148737 | ENSG00000148737 | TCF7L2        | 10:114710i | 22.169  | 8.328  | -0.979 | 3.308 | 0.001 | 0.015 | yes | 22.1688   | 9.86692   | 34.4707   | 8.32827   | 6.61466  | 10.0419  |
| ENSG00000159128 | ENSG00000159128 | IFNGR2        | 21:347572i | 28.974  | 10.894 | -0.978 | 3.352 | 0.001 | 0.013 | yes | 28.9744   | 21.768    | 36.1808   | 10.8942   | 5.14167  | 16.6468  |
| ENSG00000076258 | ENSG00000076258 | FMO4          | 1:1712833. | 6.554   | 2.703  | -0.886 | 3.301 | 0.001 | 0.016 | yes | 6.55354   | 4.20691   | 8.90017   | 2.70261   | 1.62198  | 3.78323  |
| ENSG00000171169 | ENSG00000171169 | NAIF1         | 9:1308235  | 22.408  | 9.44   | -0.864 | 3.31  | 0.001 | 0.015 | yes | 22.4077   | 16.0485   | 28.7668   | 9.43959   | 5.29978  | 13.5794  |
| ENSG00000235546 | ENSG00000235546 | AC087499.5    | 17:205159i | 5.31    | 2.337  | -0.821 | 3.477 | 0.001 | 0.009 | yes | 5.30998   | 3.9731    | 6.64686   | 2.337     | 1.4039   | 3.2701   |
| ENSG00000157107 | ENSG00000157107 | FCHO2         | 5:7225180  | 13.297  | 6.118  | -0.776 | 3.288 | 0.001 | 0.016 | yes | 13.2972   | 9.23697   | 17.3575   | 6.11844   | 3.91506  | 8.32182  |
| ENSG00000248168 | ENSG00000248168 | AC138028.2    | 16:887382  | 1.428   | 0.672  | -0.754 | 3.304 | 0.001 | 0.015 | yes | 1.42833   | 1.07157   | 1.78508   | 0.672017  | 0.415334 | 0.928701 |
| ENSG00000110013 | ENSG00000110013 | SIAE          | 11:124492  | 10.892  | 5.166  | -0.746 | 3.437 | 0.001 | 0.01  | yes | 10.8921   | 8.07581   | 13.7084   | 5.16632   | 3.3656   | 6.96704  |
| ENSG00000138380 | ENSG00000138380 | ALS2CR8       | 2:2037453. | 8.816   | 4.217  | -0.737 | 3.297 | 0.001 | 0.016 | yes | 8.81626   | 6.37593   | 11.2566   | 4.2174    | 2.73565  | 5.69916  |
| ENSG00000228834 | ENSG00000228834 | RP11-249L21.4 | 6:1091696  | 95.225  | 45.902 | -0.73  | 3.298 | 0.001 | 0.016 | yes | 95.2248   | 71.8291   | 118.62    | 45.9018   | 29.0081  | 62.7955  |
| ENSG00000110446 | ENSG00000110446 | SLC15A3       | 11:606806. | 18.19   | 8.933  | -0.711 | 3.313 | 0.001 | 0.015 | yes | 18.1902   | 14.319    | 22.0614   | 8.93291   | 5.60256  | 12.2632  |
| ENSG00000167165 | ENSG00000167165 | UGT1A6        | 2:2345262i | 0.218   | 0.109  | -0.688 | 3.229 | 0.001 | 0.019 | yes | 0.21775   | 0.128466  | 0.307035  | 0.109403  | 0.096651 | 0.122155 |
| ENSG00000166526 | ENSG00000166526 | ZNF3          | 7:9964738i | 77.199  | 38.858 | -0.686 | 3.244 | 0.001 | 0.019 | yes | 77.1985   | 46.0071   | 108.39    | 38.8577   | 33.97    | 43.7454  |
| ENSG00000198400 | ENSG00000198400 | NTRK1         | 1:1567760. | 0.136   | 0.069  | -0.673 | 3.393 | 0.001 | 0.012 | yes | 0.136062  | 0.102974  | 0.169151  | 0.0693823 | 0.047616 | 0.091149 |
| ENSG00000161813 | ENSG00000161813 | LARP4         | 12:507200  | 24.66   | 12.7   | -0.664 | 3.3   | 0.001 | 0.016 | yes | 24.6603   | 15.8869   | 33.4336   | 12.6998   | 10.3172  | 15.0824  |
| ENSG00000197429 | ENSG00000197429 | IPP           | 1:4609297i | 9.735   | 5.104  | -0.646 | 3.409 | 0.001 | 0.011 | yes | 9.73531   | 6.91623   | 12.5544   | 5.10367   | 3.85708  | 6.35027  |
| ENSG00000229638 | ENSG00000229638 | RP11-110C15.4 | 3:1850007. | 7.532   | 3.948  | -0.646 | 3.338 | 0.001 | 0.014 | yes | 7.53171   | 5.8198    | 9.24361   | 3.94782   | 2.71119  | 5.18446  |
| ENSG00000230870 | ENSG00000230870 | FBXW11P1      | 21:329994. | 7.219   | 3.954  | -0.602 | 3.324 | 0.001 | 0.015 | yes | 7.21886   | 5.63991   | 8.7978    | 3.95408   | 2.81264  | 5.09553  |
| ENSG00000186106 | ENSG00000186106 | ANKRD46       | 8:1015219i | 27.175  | 15.048 | -0.591 | 3.175 | 0.001 | 0.023 | yes | 27.1745   | 21.238    | 33.111    | 15.0482   | 10.512   | 19.5845  |
| ENSG00000204390 | ENSG00000204390 | HSPA1L        | 6:3177739i | 4.498   | 2.492  | -0.591 | 3.324 | 0.001 | 0.015 | yes | 4.49841   | 3.57425   | 5.42257   | 2.49182   | 1.76908  | 3.21457  |
| ENSG00000127838 | ENSG00000127838 | PNKD          | 2:2191351  | 84.416  | 46.81  | -0.59  | 3.414 | 0.001 | 0.011 | yes | 84.4161   | 60.6006   | 108.232   | 46.8095   | 37.4763  | 56.1427  |
| ENSG00000100522 | ENSG00000100522 | GNPNAT1       | 14:532419  | 72.817  | 40.733 | -0.581 | 3.428 | 0.001 | 0.011 | yes | 72.8174   | 55.764    | 89.8708   | 40.7331   | 30.7517  | 50.7146  |
| ENSG00000115541 | ENSG00000115541 | HSPE1         | 2:1983513i | 29.949  | 16.91  | -0.572 | 3.271 | 0.001 | 0.017 | yes | 29.9486   | 24.1767   | 35.7206   | 16.9098   | 11.9794  | 21.8402  |
| ENSG00000149313 | ENSG00000149313 | AASDHPPT      | 11:105921i | 18.782  | 10.661 | -0.566 | 3.313 | 0.001 | 0.015 | yes | 18.7815   | 14.1048   | 23.4581   | 10.6608   | 8.16299  | 13.1585  |
| ENSG00000255432 | ENSG00000255432 | RP11-831H9.11 | 11:624143  | 29.843  | 16.941 | -0.566 | 3.443 | 0.001 | 0.01  | yes | 29.8434   | 23.7144   | 35.9723   | 16.9414   | 12.5899  | 21.2928  |
| ENSG00000168496 | ENSG00000168496 | FEN1          | 11:614479i | 11.882  | 6.772  | -0.562 | 3.367 | 0.001 | 0.013 | yes | 11.8824   | 9.41652   | 14.3483   | 6.77245   | 5.00081  | 8.54408  |
| ENSG00000176261 | ENSG00000176261 | ZBTB8OS       | 1:3293065i | 31.113  | 17.802 | -0.558 | 3.186 | 0.001 | 0.022 | yes | 31.1133   | 24.6677   | 37.5589   | 17.8018   | 12.7689  | 22.8347  |
| ENSG00000114126 | ENSG00000114126 | TFDP2         | 3:1416632i | 46.817  | 27.637 | -0.527 | 3.263 | 0.001 | 0.018 | yes | 46.817    | 39.0862   | 54.5479   | 27.6365   | 19.9613  | 35.3117  |
| ENSG00000197620 | ENSG00000197620 | CXorf40A      | X:1485585. | 25.311  | 15.167 | -0.512 | 3.47  | 0.001 | 0.009 | yes | 25.3114   | 21.6916   | 28.9312   | 15.1667   | 11.2505  | 19.0829  |
| ENSG00000138433 | ENSG00000138433 | CIR1          | 2:1752127i | 14.595  | 8.982  | -0.485 | 3.411 | 0.001 | 0.011 | yes | 14.5948   | 11.5051   | 17.6845   | 8.98205   | 7.27284  | 10.6913  |
| ENSG00000154277 | ENSG00000154277 | UCHL1         | 4:4122209i | 36.749  | 22.773 | -0.479 | 3.329 | 0.001 | 0.014 | yes | 36.7488   | 27.7165   | 45.781    | 22.7732   | 19.3779  | 26.1686  |
| ENSG00000174775 | ENSG00000174775 | HRAS          | 11:532241. | 598.726 | 372.76 | -0.474 | 3.298 | 0.001 | 0.016 | yes | 598.726   | 462.738   | 734.714   | 372.76    | 307.146  | 438.374  |
| ENSG00000174579 | ENSG00000174579 | MSL2          | 3:1358677i | 57.614  | 36.478 | -0.457 | 3.377 | 0.001 | 0.012 | yes | 57.6144   | 50.1682   | 65.0606   | 36.4777   | 27.8016  | 45.1539  |
| ENSG00000112365 | ENSG00000112365 | ZBTB24        | 6:1097652i | 4.057   | 2.58   | -0.453 | 3.48  | 0.001 | 0.009 | yes | 4.05742   | 3.37722   | 4.73763   | 2.58032   | 2.06719  | 3.09345  |
| ENSG00000233830 | ENSG00000233830 | AC073150.4    | 7:2749778  | 49.577  | 32.623 | -0.418 | 3.347 | 0.001 | 0.014 | yes | 49.5765   | 41.5284   | 57.6245   | 32.6232   | 26.4186  | 38.8278  |
| ENSG00000153993 | ENSG00000153993 | SEMA3D        | 7:8462486. | 16.501  | 10.883 | -0.416 | 3.385 | 0.001 | 0.012 | yes | 16.501    | 13.8584   | 19.1435   | 10.8826   | 8.85174  | 12.9136  |
| ENSG00000131381 | ENSG00000131381 | ZFYVE20       | 3:1511157i | 55.78   | 37.645 | -0.393 | 3.395 | 0.001 | 0.012 | yes | 55.7796   | 50.4286   | 61.1306   | 37.6449   | 29.7069  | 45.5828  |
| ENSG00000204859 | ENSG00000204859 | ZBTB48        | 1:6640060. | 18.697  | 12.714 | -0.386 | 3.286 | 0.001 | 0.016 | yes | 18.6973   | 15.6714   | 21.7233   | 12.714    | 10.5526  | 14.8754  |
| ENSG00000050426 | ENSG00000050426 | LETMD1        | 12:514417. | 96.095  | 65.539 | -0.383 | 3.433 | 0.001 | 0.01  | yes | 96.0948   | 78.5555   | 113.634   | 65.5386   | 57.1485  | 73.9288  |
| ENSG00000139116 | ENSG00000139116 | KIF21A        | 12:396870. | 11.035  | 7.667  | -0.364 | 3.415 | 0.001 | 0.011 | yes | 11.0348   | 9.12121   | 12.9484   | 7.66728   | 6.71631  | 8.61825  |
| ENSG00000249921 | ENSG00000249921 | CTC-329H14.1  | 5:1080835. | 57.057  | 39.947 | -0.357 | 3.39  | 0.001 | 0.012 | yes | 57.0572   | 49.1265   | 64.988    | 39.9465   | 33.64    | 46.253   |
| ENSG00000126226 | ENSG00000126226 | PCID2         | 13:113831i | 50.145  | 35.519 | -0.345 | 3.42  | 0.001 | 0.011 | yes | 50.1448   | 44.137    | 56.1526   | 35.5187   | 29.7569  | 41.2805  |



|                 |                 |            |            |         |         |            |            |       |       |     |          |           |          |         |         |         |
|-----------------|-----------------|------------|------------|---------|---------|------------|------------|-------|-------|-----|----------|-----------|----------|---------|---------|---------|
| ENSG00000162889 | ENSG00000162889 | MAPKAPK2   | 1:2068582: | 318.94  | 225.853 | -0.345     | 3.214      | 0.001 | 0.02  | yes | 318.94   | 272.49    | 365.391  | 225.853 | 190.204 | 261.501 |
| ENSG00000169967 | ENSG00000169967 | MAP3K2     | 2:1280563: | 40.604  | 28.771  | -0.344     | 3.214      | 0.001 | 0.02  | yes | 40.6035  | 35.6812   | 45.5259  | 28.7713 | 23.6856 | 33.8569 |
| ENSG00000204310 | ENSG00000204310 | AGPAT1     | 6:3211613: | 185.382 | 131.84  | -0.341     | 3.44       | 0.001 | 0.01  | yes | 185.382  | 161.235   | 209.529  | 131.84  | 112.15  | 151.53  |
| ENSG00000134905 | ENSG00000134905 | CARS2      | 13:111267: | 76.45   | 54.709  | -0.335     | 3.311      | 0.001 | 0.015 | yes | 76.4498  | 67.169    | 85.7306  | 54.709  | 45.8675 | 63.5505 |
| ENSG00000139289 | ENSG00000139289 | PHLDA1     | 12:764192: | 22.86   | 16.358  | -0.335     | 3.193      | 0.001 | 0.022 | yes | 22.8596  | 19.6603   | 26.059   | 16.3582 | 13.806  | 18.9104 |
| ENSG00000114279 | ENSG00000114279 | FGF12      | 3:1918596: | 30.063  | 21.631  | -0.329     | 3.254      | 0.001 | 0.018 | yes | 30.063   | 25.8372   | 34.2889  | 21.6305 | 18.4833 | 24.7778 |
| ENSG00000196126 | ENSG00000196126 | HLA-DRB1   | 6:3254654: | 61.389  | 44.382  | -0.324     | 3.459      | 0.001 | 0.01  | yes | 61.3886  | 53.6992   | 69.078   | 44.3824 | 38.1878 | 50.5769 |
| ENSG00000154889 | ENSG00000154889 | MPPE1      | 18:116891: | 16.73   | 12.189  | -0.317     | 3.383      | 0.001 | 0.012 | yes | 16.7302  | 14.611    | 18.8494  | 12.1888 | 10.5086 | 13.8689 |
| ENSG00000214014 | ENSG00000214014 | OVCA2      | 17:193343: | 102.289 | 74.567  | -0.316     | 3.391      | 0.001 | 0.012 | yes | 102.289  | 89.5341   | 115.044  | 74.5667 | 64.2337 | 84.8997 |
| ENSG00000121310 | ENSG00000121310 | ECHDC2     | 1:5336165: | 84.041  | 61.404  | -0.314     | 3.281      | 0.001 | 0.017 | yes | 84.0409  | 73.3808   | 94.7009  | 61.4039 | 52.6124 | 70.1954 |
| ENSG00000101654 | ENSG00000101654 | RNMT       | 18:137266: | 29.795  | 21.952  | -0.306     | 3.32       | 0.001 | 0.015 | yes | 29.7953  | 25.9648   | 33.6258  | 21.9518 | 19.0614 | 24.8423 |
| ENSG00000175029 | ENSG00000175029 | CTBP2      | 10:126605: | 55.443  | 40.811  | -0.306     | 3.25       | 0.001 | 0.018 | yes | 55.4425  | 48.4635   | 62.4215  | 40.8105 | 35.0807 | 46.5402 |
| ENSG00000215472 | ENSG00000215472 | RPL17      | 18:470148: | 69.481  | 51.467  | -0.3       | 3.185      | 0.001 | 0.022 | yes | 69.4812  | 60.8911   | 78.0714  | 51.4671 | 44.1456 | 58.7886 |
| ENSG00000197375 | ENSG00000197375 | SLC22A5    | 5:1315205: | 56.779  | 42.585  | -0.288     | 3.187      | 0.001 | 0.022 | yes | 56.7789  | 50.1771   | 63.3807  | 42.5845 | 36.7021 | 48.4669 |
| ENSG00000070366 | ENSG00000070366 | SMG6       | 17:196313: | 28.694  | 21.7    | -0.279     | 3.392      | 0.001 | 0.012 | yes | 28.6939  | 26.2543   | 31.1334  | 21.6995 | 18.637  | 24.7619 |
| ENSG00000143093 | ENSG00000143093 | FAM40A     | 1:1105741: | 43.937  | 33.309  | -0.277     | 3.345      | 0.001 | 0.014 | yes | 43.937   | 38.9944   | 48.8796  | 33.3088 | 29.2608 | 37.3568 |
| ENSG00000182481 | ENSG00000182481 | KPNA2      | 17:658216: | 60.936  | 46.561  | -0.269     | 3.294      | 0.001 | 0.016 | yes | 60.9363  | 54.1701   | 67.7024  | 46.5613 | 40.9822 | 52.1403 |
| ENSG00000148296 | ENSG00000148296 | SURF6      | 9:1361975: | 45.657  | 34.918  | -0.268     | 3.238      | 0.001 | 0.019 | yes | 45.657   | 40.5973   | 50.7166  | 34.9182 | 30.6197 | 39.2168 |
| ENSG00000186501 | ENSG00000186501 | TMEM222    | 1:2764865: | 63.6    | 49.031  | -0.26      | 3.192      | 0.001 | 0.022 | yes | 63.6     | 56.1856   | 71.0145  | 49.0308 | 43.4435 | 54.6182 |
| ENSG00000121067 | ENSG00000121067 | SPOP       | 17:476762: | 50.178  | 38.734  | -0.259     | 3.305      | 0.001 | 0.015 | yes | 50.1783  | 45.2001   | 55.1566  | 38.7337 | 34.0388 | 43.4287 |
| ENSG00000167552 | ENSG00000167552 | TUBA1A     | 12:495785: | 86.847  | 67.407  | -0.253     | 3.259      | 0.001 | 0.018 | yes | 86.8471  | 78.4812   | 95.213   | 67.407  | 59.1778 | 75.6362 |
| ENSG00000109079 | ENSG00000109079 | TNFAIP1    | 17:266627: | 38.237  | 29.841  | -0.248     | 3.389      | 0.001 | 0.012 | yes | 38.2369  | 34.4644   | 42.0094  | 29.8406 | 26.616  | 33.0653 |
| ENSG00000083845 | ENSG00000083845 | RPS5       | 19:588986: | 368.098 | 287.667 | -0.247     | 3.396      | 0.001 | 0.012 | yes | 368.098  | 331.445   | 404.75   | 287.667 | 257.272 | 318.062 |
| ENSG00000141219 | ENSG00000141219 | C17orf80   | 17:711887: | 23.94   | 18.74   | -0.245     | 3.359      | 0.001 | 0.013 | yes | 23.9403  | 21.613    | 26.2676  | 18.7396 | 16.7028 | 20.7763 |
| ENSG00000060339 | ENSG00000060339 | CCAR1      | 10:704807: | 145.787 | 114.883 | -0.238     | 3.434      | 0.001 | 0.01  | yes | 145.787  | 132.878   | 158.697  | 114.883 | 102.611 | 127.156 |
| ENSG00000126351 | ENSG00000126351 | THRA       | 17:382184: | 23.995  | 18.981  | -0.234     | 3.236      | 0.001 | 0.019 | yes | 23.9947  | 21.6636   | 26.3258  | 18.9806 | 16.9401 | 21.021  |
| ENSG00000198742 | ENSG00000198742 | SMURF1     | 7:9847555: | 42.51   | 33.909  | -0.226     | 3.337      | 0.001 | 0.014 | yes | 42.5099  | 38.6013   | 46.4185  | 33.9088 | 30.5345 | 37.2831 |
| ENSG00000109971 | ENSG00000109971 | HSPA8      | 11:122928: | 299.105 | 239.503 | -0.222     | 3.252      | 0.001 | 0.018 | yes | 299.105  | 271.763   | 326.448  | 239.503 | 215.172 | 263.833 |
| ENSG00000244462 | ENSG00000244462 | RBM12      | 20:342139: | 124.03  | 99.782  | -0.218     | 3.437      | 0.001 | 0.01  | yes | 124.03   | 113.535   | 134.524  | 99.7823 | 90.3894 | 109.175 |
| ENSG00000130222 | ENSG00000130222 | GADD45G    | 9:9221992: | 162.374 | 131.064 | -0.214     | 3.237      | 0.001 | 0.019 | yes | 162.374  | 147.404   | 177.345  | 131.064 | 118.62  | 143.509 |
| ENSG00000167741 | ENSG00000167741 | GGT6       | 17:446022: | 75.844  | 61.714  | -0.206     | 3.473      | 0.001 | 0.009 | yes | 75.8441  | 69.5107   | 82.1774  | 61.7135 | 56.5045 | 66.9226 |
| ENSG00000110075 | ENSG00000110075 | PPP6R3     | 11:682281: | 104.924 | 86.586  | -0.192     | 3.186      | 0.001 | 0.022 | yes | 104.924  | 96.5619   | 113.286  | 86.5859 | 78.7489 | 94.4228 |
| ENSG00000198925 | ENSG00000198925 | ATG9A      | 2:2200744: | 111.276 | 91.821  | -0.192     | 3.202      | 0.001 | 0.021 | yes | 111.276  | 102.297   | 120.255  | 91.821  | 83.6599 | 99.9821 |
| ENSG00000171604 | ENSG00000171604 | CXXC5      | 5:1390268: | 340.757 | 282.446 | -0.188     | 3.189      | 0.001 | 0.022 | yes | 340.757  | 314.832   | 366.683  | 282.446 | 257.078 | 307.814 |
| ENSG00000090905 | ENSG00000090905 | TNRC6A     | 16:247410: | 33.32   | 27.801  | -0.181     | 3.224      | 0.001 | 0.02  | yes | 33.3195  | 30.9454   | 35.6936  | 27.8009 | 25.3872 | 30.2146 |
| ENSG00000140836 | ENSG00000140836 | ZFXH3      | 16:728167: | 21.025  | 17.565  | -0.18      | 3.323      | 0.001 | 0.015 | yes | 21.0248  | 19.4474   | 22.6023  | 17.5645 | 16.1945 | 18.9345 |
| ENSG00000141380 | ENSG00000141380 | SS18       | 18:235962: | 87.538  | 73.596  | -0.173     | 3.234      | 0.001 | 0.019 | yes | 87.5376  | 80.897    | 94.1783  | 73.5957 | 68.0119 | 79.1795 |
| ENSG00000196923 | ENSG00000196923 | PDLIM7     | 5:1769103: | 259.595 | 218.581 | -0.172     | 3.38       | 0.001 | 0.012 | yes | 259.595  | 241.327   | 277.862  | 218.581 | 202.514 | 234.649 |
| ENSG00000023191 | ENSG00000023191 | RNH1       | 11:494511: | 188.036 | 159.457 | -0.165     | 3.471      | 0.001 | 0.009 | yes | 188.036  | 175.98    | 200.093  | 159.457 | 148.278 | 170.636 |
| ENSG00000170027 | ENSG00000170027 | YWHAG      | 7:7595611: | 368.16  | 314.519 | -0.157     | 3.283      | 0.001 | 0.016 | yes | 368.16   | 343.827   | 392.494  | 314.519 | 292.656 | 336.382 |
| ENSG00000100605 | ENSG00000100605 | ITPK1      | 14:934032: | 440.529 | 379.721 | -0.149     | 3.29       | 0.001 | 0.016 | yes | 440.529  | 414.715   | 466.342  | 379.721 | 353.635 | 405.806 |
| ENSG00000110092 | ENSG00000110092 | CCND1      | 11:694558: | 815.645 | 703.08  | -0.149     | 3.295      | 0.001 | 0.016 | yes | 815.645  | 765.155   | 866.136  | 703.08  | 657.02  | 749.141 |
| ENSG00000196557 | ENSG00000196557 | CACNA1H    | 16:120324: | 120.065 | 103.732 | -0.146     | 3.179      | 0.001 | 0.023 | yes | 120.065  | 112.365   | 127.764  | 103.732 | 96.8913 | 110.573 |
| ENSG00000177731 | ENSG00000177731 | FLII       | 17:181289: | 706.317 | 613.124 | -0.141     | 3.376      | 0.001 | 0.012 | yes | 706.317  | 665.963   | 746.671  | 613.124 | 575.519 | 650.729 |
| ENSG00000111907 | ENSG00000111907 | TPD52L1    | 6:1254401: | 813.46  | 710.92  | -0.135     | 3.205      | 0.001 | 0.021 | yes | 813.46   | 766.22    | 860.699  | 710.92  | 667.697 | 754.143 |
| ENSG00000039523 | ENSG00000039523 | FAM65A     | 16:675627: | 101.32  | 88.783  | -0.132     | 3.211      | 0.001 | 0.021 | yes | 101.32   | 95.6602   | 106.98   | 88.783  | 83.4213 | 94.1447 |
| ENSG00000105694 | ENSG00000105694 | AC104537.1 | 19:251121: | 5.392   | 0       | -1.79769e+ | -1.79769e+ | 0.001 | 0.019 | yes | 5.3921   | 1.83617   | 8.94803  | 0       | 0       | 0       |
| ENSG00000120729 | ENSG00000120729 | MYOT       | 5:1371500: | 0.225   | 0       | -1.79769e+ | -1.79769e+ | 0.001 | 0.017 | yes | 0.225116 | 0.0783512 | 0.371881 | 0       | 0       | 0       |
| ENSG00000159337 | ENSG00000159337 | PLA2G4D    | 15:423598: | 0.252   | 0       | -1.79769e+ | -1.79769e+ | 0.001 | 0.021 | yes | 0.251914 | 0.0839715 | 0.419857 | 0       | 0       | 0       |
| ENSG00000172543 | ENSG00000172543 | CTSW       | 11:656472: | 0.333   | 0       | -1.79769e+ | -1.79769e+ | 0.001 | 0.014 | yes | 0.332506 | 0.121107  | 0.543905 | 0       | 0       | 0       |

|                 |                 |                |           |         |         |        |            |            |       |       |     |          |          |          |          |          |          |
|-----------------|-----------------|----------------|-----------|---------|---------|--------|------------|------------|-------|-------|-----|----------|----------|----------|----------|----------|----------|
| ENSG00000207110 | ENSG00000207110 | U1             | 8:1288067 | 56.649  |         | 0      | -1.79769e+ | -1.79769e+ | 0.001 | 0.021 | yes | 56.6486  | 18.8005  | 94.4967  | 0        | 0        | 0        |
| ENSG00000229780 | ENSG00000229780 | RP11-61L14.2   | 1:1545210 | 4.362   |         | 0      | -1.79769e+ | -1.79769e+ | 0.001 | 0.01  | yes | 4.36242  | 1.68251  | 7.04232  | 0        | 0        | 0        |
| ENSG00000236507 | ENSG00000236507 | RP5-1050E16.1  | 9:9250114 | 1.199   |         | 0      | -1.79769e+ | -1.79769e+ | 0.001 | 0.019 | yes | 1.19927  | 0.408388 | 1.99015  | 0        | 0        | 0        |
| ENSG00000254480 | ENSG00000254480 | RP11-23F23.2   | 11:411593 | 3.638   |         | 0      | -1.79769e+ | -1.79769e+ | 0.001 | 0.013 | yes | 3.6377   | 1.336    | 5.9394   | 0        | 0        | 0        |
| ENSG00000257069 | ENSG00000257069 | RP11-783K16.10 | 11:640587 | 0.354   |         | 0      | -1.79769e+ | -1.79769e+ | 0.001 | 0.017 | yes | 0.353898 | 0.123799 | 0.583997 | 0        | 0        | 0        |
| ENSG00000258034 | ENSG00000258034 | RP11-493P1.2   | 12:116395 | 3.347   |         | 0      | -1.79769e+ | -1.79769e+ | 0.001 | 0.01  | yes | 3.34692  | 1.28815  | 5.4057   | 0        | 0        | 0        |
| ENSG00000258588 | ENSG00000258588 | TRIM6-TRIM34   | 11:527441 | 0.297   |         | 0      | -1.79769e+ | -1.79769e+ | 0.001 | 0.013 | yes | 0.296842 | 0.109102 | 0.484582 | 0        | 0        | 0        |
| ENSG00000258953 | ENSG00000258953 | C5orf63        | 5:1263782 | 6.447   |         | 0      | -1.79769e+ | -1.79769e+ | 0.001 | 0.013 | yes | 6.44709  | 2.36969  | 10.5245  | 0        | 0        | 0        |
| ENSG00000255471 | ENSG00000255471 | RP11-736K20.5  | 11:865021 | 4.267   | 0.246   | -2.853 | 3.143      |            | 0.002 | 0.025 | yes | 4.26718  | 0        | 9.49861  | 0.246034 | 0        | 0.575525 |
| ENSG00000139211 | ENSG00000139211 | AMIGO2         | 12:474694 | 0.946   | 0.113   | -2.129 | 3.167      |            | 0.002 | 0.023 | yes | 0.94606  | 0.535906 | 1.35622  | 0.11257  | 0        | 0.255795 |
| ENSG00000243725 | ENSG00000243725 | TTC4           | 1:5510745 | 6.637   | 1.156   | -1.747 | 3.169      |            | 0.002 | 0.023 | yes | 6.63697  | 3.33564  | 9.93831  | 1.15649  | 0.018221 | 2.29476  |
| ENSG00000170289 | ENSG00000170289 | CNGB3          | 8:8734550 | 1.805   | 0.498   | -1.288 | 3.139      |            | 0.002 | 0.025 | yes | 1.80543  | 0.441404 | 3.16945  | 0.497754 | 0.338055 | 0.657454 |
| ENSG00000236810 | ENSG00000236810 | RP5-886K2.3    | 1:2406964 | 3.916   | 1.107   | -1.263 | 3.117      |            | 0.002 | 0.027 | yes | 3.91601  | 2.06877  | 5.76325  | 1.10719  | 0.377528 | 1.83686  |
| ENSG00000163521 | ENSG00000163521 | GLB1L          | 2:2200944 | 6.3     | 2.472   | -0.936 | 3.093      |            | 0.002 | 0.029 | yes | 6.30039  | 4.20175  | 8.39902  | 2.47177  | 1.22316  | 3.72037  |
| ENSG00000244041 | ENSG00000244041 | RP1-90J20.7    | 6:2988200 | 5.527   | 2.172   | -0.934 | 3.066      |            | 0.002 | 0.031 | yes | 5.52666  | 3.78372  | 7.26961  | 2.17194  | 1.03965  | 3.30424  |
| ENSG00000246889 | ENSG00000246889 | AP000487.5     | 11:701168 | 12.542  | 5.205   | -0.879 | 3.123      |            | 0.002 | 0.027 | yes | 12.5424  | 8.65673  | 16.428   | 5.20525  | 2.75747  | 7.65304  |
| ENSG00000154134 | ENSG00000154134 | ROBO3          | 11:124735 | 21.424  | 8.973   | -0.87  | 3.143      |            | 0.002 | 0.025 | yes | 21.4235  | 16.7976  | 26.0495  | 8.97344  | 4.39691  | 13.55    |
| ENSG00000147650 | ENSG00000147650 | LRP12          | 8:1055014 | 10.715  | 4.527   | -0.862 | 3.036      |            | 0.002 | 0.034 | yes | 10.7147  | 5.68758  | 15.7419  | 4.52675  | 3.08093  | 5.97257  |
| ENSG00000214300 | ENSG00000214300 | SPDYE3         | 7:9990532 | 4.302   | 1.891   | -0.822 | 3.146      |            | 0.002 | 0.025 | yes | 4.30208  | 3.18408  | 5.42009  | 1.8913   | 1.03402  | 2.74858  |
| ENSG00000169964 | ENSG00000169964 | TMEM42         | 3:4480320 | 5.388   | 2.385   | -0.815 | 3.125      |            | 0.002 | 0.027 | yes | 5.38774  | 3.8999   | 6.87558  | 2.38463  | 1.32905  | 3.44022  |
| ENSG00000172345 | ENSG00000172345 | STARD5         | 15:814750 | 4.094   | 1.947   | -0.743 | 3.113      |            | 0.002 | 0.027 | yes | 4.09377  | 2.92073  | 5.2668   | 1.94734  | 1.20402  | 2.69067  |
| ENSG00000213398 | ENSG00000213398 | LCAT           | 16:679736 | 3.421   | 1.644   | -0.733 | 3.147      |            | 0.002 | 0.025 | yes | 3.42127  | 2.54444  | 4.2981   | 1.64376  | 1.00433  | 2.2832   |
| ENSG00000155984 | ENSG00000155984 | TMEM185A       | X:1486782 | 56.22   | 28.166  | -0.691 | 3.105      |            | 0.002 | 0.028 | yes | 56.2199  | 40.2284  | 72.2114  | 28.1663  | 18.5219  | 37.8108  |
| ENSG00000255529 | ENSG00000255529 | GRINL1A        | 15:578841 | 3.07    | 1.58    | -0.665 | 3.07       |            | 0.002 | 0.031 | yes | 3.0701   | 2.05789  | 4.08232  | 1.57955  | 1.13646  | 2.02265  |
| ENSG00000189343 | ENSG00000189343 | AC004448.3     | 17:193424 | 9.429   | 4.959   | -0.643 | 3.041      |            | 0.002 | 0.034 | yes | 9.42878  | 7.17343  | 11.6841  | 4.95907  | 3.2315   | 6.68664  |
| ENSG00000240429 | ENSG00000240429 | LRRFIP1P1      | 3:1788659 | 3.628   | 1.922   | -0.635 | 3.16       |            | 0.002 | 0.024 | yes | 3.62805  | 2.77779  | 4.4783   | 1.9224   | 1.29455  | 2.55025  |
| ENSG00000076321 | ENSG00000076321 | KLHL20         | 1:1736840 | 27.103  | 14.523  | -0.624 | 3.115      |            | 0.002 | 0.027 | yes | 27.1029  | 19.8536  | 34.3522  | 14.5229  | 10.1918  | 18.854   |
| ENSG00000065970 | ENSG00000065970 | FOXJ2          | 12:791781 | 7.866   | 4.292   | -0.606 | 3.141      |            | 0.002 | 0.025 | yes | 7.86552  | 6.01701  | 9.71403  | 4.29246  | 2.97976  | 5.60516  |
| ENSG00000053747 | ENSG00000053747 | LAMA3          | 18:212695 | 3.971   | 2.253   | -0.567 | 3.149      |            | 0.002 | 0.025 | yes | 3.9714   | 2.81869  | 5.1241   | 2.2532   | 1.77363  | 2.73277  |
| ENSG00000186815 | ENSG00000186815 | TPCN1          | 12:113633 | 46.566  | 26.515  | -0.563 | 3.083      |            | 0.002 | 0.03  | yes | 46.5661  | 35.1237  | 58.0085  | 26.5149  | 19.3454  | 33.6845  |
| ENSG00000151422 | ENSG00000151422 | FER            | 5:1080835 | 10.849  | 6.464   | -0.518 | 3.046      |            | 0.002 | 0.033 | yes | 10.8493  | 8.19463  | 13.504   | 6.46366  | 4.93744  | 7.98988  |
| ENSG00000145819 | ENSG00000145819 | ARHGAP26       | 5:1421499 | 71.907  | 43.779  | -0.496 | 3.106      |            | 0.002 | 0.028 | yes | 71.9067  | 55.6032  | 88.2102  | 43.7785  | 33.9222  | 53.6347  |
| ENSG00000254531 | ENSG00000254531 | AP001816.1     | 4:1019445 | 33.566  | 20.553  | -0.491 | 3.159      |            | 0.002 | 0.024 | yes | 33.5662  | 26.9375  | 40.1949  | 20.553   | 15.6269  | 25.4791  |
| ENSG00000231770 | ENSG00000231770 | AC046143.5     | 3:1943047 | 14.179  | 8.782   | -0.479 | 3.119      |            | 0.002 | 0.027 | yes | 14.1785  | 11.3874  | 16.9695  | 8.78199  | 6.71103  | 10.853   |
| ENSG00000187796 | ENSG00000187796 | CARD9          | 9:1392219 | 7.02    | 4.371   | -0.474 | 3.064      |            | 0.002 | 0.032 | yes | 7.01956  | 5.85563  | 8.18349  | 4.371    | 3.23004  | 5.51195  |
| ENSG00000164051 | ENSG00000164051 | CCDC51         | 3:4847357 | 19.23   | 12.476  | -0.433 | 3.084      |            | 0.002 | 0.03  | yes | 19.2296  | 15.6565  | 22.8026  | 12.4759  | 9.85353  | 15.0982  |
| ENSG00000006062 | ENSG00000006062 | MAP3K14        | 17:433404 | 6.057   | 3.983   | -0.419 | 3.1        |            | 0.002 | 0.028 | yes | 6.0567   | 5.00461  | 7.1088   | 3.98288  | 3.15721  | 4.80855  |
| ENSG00000108797 | ENSG00000108797 | CNTNAP1        | 17:408346 | 3.335   | 2.195   | -0.418 | 3.034      |            | 0.002 | 0.034 | yes | 3.33514  | 2.73947  | 3.93081  | 2.19504  | 1.73382  | 2.65626  |
| ENSG00000135749 | ENSG00000135749 | PCNXL2         | 1:2331198 | 77.642  | 51.711  | -0.406 | 3.06       |            | 0.002 | 0.032 | yes | 77.6418  | 66.7374  | 88.5462  | 51.7111  | 40.049   | 63.3733  |
| ENSG00000100099 | ENSG00000100099 | HPS4           | 22:268252 | 40.475  | 27.361  | -0.392 | 3.143      |            | 0.002 | 0.025 | yes | 40.4748  | 32.7725  | 48.1771  | 27.361   | 22.9619  | 31.7601  |
| ENSG00000151725 | ENSG00000151725 | MLF1IP         | 4:1855707 | 22.82   | 15.499  | -0.387 | 3.05       |            | 0.002 | 0.033 | yes | 22.8203  | 19.2061  | 26.4345  | 15.4988  | 12.4278  | 18.5698  |
| ENSG00000162746 | ENSG00000162746 | FCRLB          | 1:1616913 | 23.986  | 16.38   | -0.381 | 3.107      |            | 0.002 | 0.028 | yes | 23.9859  | 21.0747  | 26.897   | 16.3799  | 12.8849  | 19.875   |
| ENSG00000144504 | ENSG00000144504 | ANKMY1         | 2:2414188 | 43.653  | 30.379  | -0.363 | 3.048      |            | 0.002 | 0.033 | yes | 43.6528  | 35.8966  | 51.4089  | 30.3789  | 25.5737  | 35.1842  |
| ENSG00000222019 | ENSG00000222019 | AC133919.6     | 16:900712 | 37.061  | 26.11   | -0.35  | 3.118      |            | 0.002 | 0.027 | yes | 37.0614  | 31.7818  | 42.3409  | 26.1101  | 21.5734  | 30.6468  |
| ENSG00000254901 | ENSG00000254901 | MEF2BNB        | 19:192563 | 30.636  | 21.808  | -0.34  | 3.122      |            | 0.002 | 0.027 | yes | 30.6358  | 26.0925  | 35.1791  | 21.8081  | 18.3303  | 25.2859  |
| ENSG00000033011 | ENSG00000033011 | ALG1           | 16:512181 | 17.957  | 12.897  | -0.331 | 3.118      |            | 0.002 | 0.027 | yes | 17.9571  | 15.486   | 20.4283  | 12.8972  | 10.8119  | 14.9825  |
| ENSG00000134982 | ENSG00000134982 | APC            | 5:1120431 | 30.565  | 22.1    | -0.324 | 3.172      |            | 0.002 | 0.023 | yes | 30.5653  | 26.1537  | 34.9769  | 22.1004  | 18.9003  | 25.3005  |
| ENSG00000227051 | ENSG00000227051 | C14orf132      | 14:965056 | 176.781 | 127.846 | -0.324 | 3.039      |            | 0.002 | 0.034 | yes | 176.781  | 160.837  | 192.725  | 127.846  | 103.138  | 152.554  |
| ENSG00000078487 | ENSG00000078487 | ZCWPW1         | 7:9999844 | 30.938  | 22.398  | -0.323 | 3.132      |            | 0.002 | 0.026 | yes | 30.9382  | 26.8499  | 35.0265  | 22.3976  | 18.8491  | 25.946   |
| ENSG00000115419 | ENSG00000115419 | GLS            | 2:1917455 | 51.704  | 37.993  | -0.308 | 3.046      |            | 0.002 | 0.033 | yes | 51.7041  | 45.4213  | 57.9869  | 37.9932  | 31.8482  | 44.1383  |

|                 |                 |                |           |         |         |            |            |       |       |     |           |           |           |           |          |          |
|-----------------|-----------------|----------------|-----------|---------|---------|------------|------------|-------|-------|-----|-----------|-----------|-----------|-----------|----------|----------|
| ENSG00000143256 | ENSG00000143256 | PFDN2          | 1:1610703 | 110.888 | 81.729  | -0.305     | 3.114      | 0.002 | 0.027 | yes | 110.888   | 96.369    | 125.408   | 81.7293   | 69.815   | 93.6435  |
| ENSG00000234750 | ENSG00000234750 | CTD-2666L21.2  | 19:123580 | 0.061   | 0.045   | -0.295     | 3.112      | 0.002 | 0.027 | yes | 0.0608837 | 0.0532283 | 0.0685392 | 0.0453351 | 0.038908 | 0.051763 |
| ENSG00000197136 | ENSG00000197136 | PCNXL3         | 11:653832 | 277.044 | 206.976 | -0.292     | 3.143      | 0.002 | 0.025 | yes | 277.044   | 242.843   | 311.246   | 206.976   | 178.317  | 235.636  |
| ENSG00000127663 | ENSG00000127663 | KDM4B          | 19:496912 | 18.487  | 14.088  | -0.272     | 3.048      | 0.002 | 0.033 | yes | 18.4865   | 16.2949   | 20.678    | 14.0879   | 12.2116  | 15.9642  |
| ENSG00000103051 | ENSG00000103051 | COG4           | 16:705144 | 218.001 | 166.205 | -0.271     | 3.132      | 0.002 | 0.026 | yes | 218.001   | 203.222   | 232.781   | 166.205   | 139.711  | 192.699  |
| ENSG00000147804 | ENSG00000147804 | SLC39A4        | 8:1456351 | 180.295 | 141.699 | -0.241     | 3.12       | 0.002 | 0.027 | yes | 180.295   | 160.121   | 200.469   | 141.699   | 126.617  | 156.78   |
| ENSG00000179409 | ENSG00000179409 | GEMIN4         | 17:647660 | 43.456  | 34.45   | -0.232     | 3.118      | 0.002 | 0.027 | yes | 43.4555   | 39.0428   | 47.8682   | 34.4498   | 30.6955  | 38.204   |
| ENSG00000119682 | ENSG00000119682 | KIAA0317       | 14:751198 | 160.903 | 128.233 | -0.227     | 3.091      | 0.002 | 0.029 | yes | 160.903   | 144.999   | 176.807   | 128.233   | 114.304  | 142.161  |
| ENSG00000225733 | ENSG00000225733 | AC090937.2     | 3:1486046 | 46.55   | 37.555  | -0.215     | 3.171      | 0.002 | 0.023 | yes | 46.5495   | 42.2521   | 50.847    | 37.5545   | 33.8337  | 41.2753  |
| ENSG00000071054 | ENSG00000071054 | MAP4K4         | 2:1023133 | 51.527  | 42.105  | -0.202     | 3.038      | 0.002 | 0.034 | yes | 51.5271   | 46.541    | 56.5132   | 42.1051   | 38.2656  | 45.9445  |
| ENSG00000113282 | ENSG00000113282 | CLINT1         | 5:1572127 | 170.538 | 139.937 | -0.198     | 3.045      | 0.002 | 0.033 | yes | 170.538   | 154.724   | 186.353   | 139.937   | 127.209  | 152.665  |
| ENSG00000061938 | ENSG00000061938 | TNK2           | 3:1955902 | 286.695 | 235.558 | -0.196     | 3.106      | 0.002 | 0.028 | yes | 286.695   | 261.399   | 311.99    | 235.558   | 214.2    | 256.915  |
| ENSG00000161618 | ENSG00000161618 | ALDH16A1       | 19:499564 | 37.587  | 30.905  | -0.196     | 3.121      | 0.002 | 0.027 | yes | 37.5865   | 34.388    | 40.785    | 30.9051   | 28.058   | 33.7522  |
| ENSG00000204427 | ENSG00000204427 | ABHD16A        | 6:3165472 | 131.745 | 109.313 | -0.187     | 3.054      | 0.002 | 0.032 | yes | 131.745   | 119.909   | 143.581   | 109.313   | 100.249  | 118.376  |
| ENSG00000132510 | ENSG00000132510 | KDM6B          | 17:774322 | 35.059  | 29.327  | -0.179     | 3.068      | 0.002 | 0.031 | yes | 35.0592   | 32.2608   | 37.8576   | 29.327    | 26.8429  | 31.8112  |
| ENSG00000123358 | ENSG00000123358 | NR4A1          | 12:524166 | 196.592 | 165.142 | -0.174     | 3.143      | 0.002 | 0.025 | yes | 196.592   | 182.66    | 210.524   | 165.142   | 151.047  | 179.238  |
| ENSG00000164855 | ENSG00000164855 | TMEM184A       | 7:1583449 | 162.917 | 139.282 | -0.157     | 3.114      | 0.002 | 0.027 | yes | 162.917   | 151.691   | 174.143   | 139.282   | 129.063  | 149.502  |
| ENSG00000155506 | ENSG00000155506 | LARP1          | 5:1540924 | 525.586 | 451.108 | -0.153     | 3.091      | 0.002 | 0.029 | yes | 525.586   | 490.803   | 560.368   | 451.108   | 417.964  | 484.251  |
| ENSG00000127616 | ENSG00000127616 | SMARCA4        | 19:110715 | 174.734 | 153.668 | -0.128     | 3.035      | 0.002 | 0.034 | yes | 174.734   | 163.74    | 185.728   | 153.668   | 144.966  | 162.371  |
| ENSG00000218521 | ENSG00000218521 | RP11-420A21.1  | 6:3778727 | 2.711   | 0       | -1.79769e+ | -1.79769e+ | 0.002 | 0.033 | yes | 2.71079   | 0.796139  | 4.62545   | 0         | 0        | 0        |
| ENSG00000233202 | ENSG00000233202 | AC006028.10    | 7:2719155 | 2.287   | 0       | -1.79769e+ | -1.79769e+ | 0.002 | 0.03  | yes | 2.28675   | 0.695573  | 3.87792   | 0         | 0        | 0        |
| ENSG00000239737 | ENSG00000239737 | AC113171.1     | 3:6770512 | 19.265  | 0       | -1.79769e+ | -1.79769e+ | 0.002 | 0.033 | yes | 19.2652   | 5.64264   | 32.8877   | 0         | 0        | 0        |
| ENSG00000255354 | ENSG00000255354 | RP11-148O21.2  | 8:1135150 | 0.279   | 0       | -1.79769e+ | -1.79769e+ | 0.002 | 0.033 | yes | 0.279034  | 0.0817271 | 0.47634   | 0         | 0        | 0        |
| ENSG00000078319 | ENSG00000078319 | PMS2P1         | 7:9990532 | 3.286   | 0.193   | -2.837     | 2.925      | 0.003 | 0.047 | yes | 3.28623   | 0         | 6.82941   | 0.192554  | 0        | 0.503037 |
| ENSG00000215298 | ENSG00000215298 | AC051642.1     | 8:2338631 | 0.809   | 0.048   | -2.83      | 3.011      | 0.003 | 0.037 | yes | 0.809296  | 0.467035  | 1.15156   | 0.0477377 | 0        | 0.135193 |
| ENSG00000250709 | ENSG00000250709 | CCDC169-SOHLH2 | 13:367423 | 0.277   | 0.031   | -2.201     | 2.958      | 0.003 | 0.043 | yes | 0.277458  | 0         | 0.646647  | 0.0307072 | 0.010236 | 0.051179 |
| ENSG00000230798 | ENSG00000230798 | RP4-792G4.2    | 1:6378655 | 3.137   | 0.577   | -1.694     | 2.957      | 0.003 | 0.043 | yes | 3.13696   | 1.34667   | 4.92726   | 0.576644  | 0.003866 | 1.14942  |
| ENSG00000205089 | ENSG00000205089 | CCNI2          | 5:1320831 | 5.401   | 1.009   | -1.678     | 2.997      | 0.003 | 0.038 | yes | 5.40109   | 2.28062   | 8.52155   | 1.00891   | 0.041542 | 1.97628  |
| ENSG00000074416 | ENSG00000074416 | MGLL           | 3:1274079 | 27.297  | 5.328   | -1.634     | 3.014      | 0.003 | 0.036 | yes | 27.2973   | 7.56742   | 47.0271   | 5.32811   | 1.02293  | 9.6333   |
| ENSG00000257918 | ENSG00000257918 | RP11-482D24.3  | 12:106751 | 0.591   | 0.128   | -1.532     | 2.974      | 0.003 | 0.041 | yes | 0.590593  | 0         | 1.19757   | 0.12757   | 0.117857 | 0.137283 |
| ENSG00000154783 | ENSG00000154783 | FGD5           | 3:1486046 | 0.855   | 0.236   | -1.288     | 2.936      | 0.003 | 0.045 | yes | 0.855072  | 0.443315  | 1.26683   | 0.235765  | 0.062756 | 0.408775 |
| ENSG00000178297 | ENSG00000178297 | TMPRSS9        | 19:238976 | 1.007   | 0.319   | -1.148     | 2.944      | 0.003 | 0.044 | yes | 1.00657   | 0.594794  | 1.41834   | 0.319353  | 0.10726  | 0.531445 |
| ENSG00000139173 | ENSG00000139173 | TMEM117        | 12:442297 | 7.2     | 2.656   | -0.997     | 2.978      | 0.003 | 0.04  | yes | 7.20016   | 4.62396   | 9.77635   | 2.65638   | 1.15238  | 4.16038  |
| ENSG00000225302 | ENSG00000225302 | RP11-539I5.1   | 10:118592 | 9.35    | 4.217   | -0.796     | 2.937      | 0.003 | 0.045 | yes | 9.34998   | 6.77824   | 11.9217   | 4.21666   | 2.2458   | 6.18751  |
| ENSG00000253485 | ENSG00000253485 | PCDHGA5        | 5:1407102 | 1.028   | 0.467   | -0.789     | 2.943      | 0.003 | 0.045 | yes | 1.02772   | 0.730322  | 1.32511   | 0.466692  | 0.255847 | 0.677538 |
| ENSG00000125954 | ENSG00000125954 | FNTB           | 14:653810 | 78.205  | 39.432  | -0.685     | 2.956      | 0.003 | 0.043 | yes | 78.2045   | 51.9922   | 104.417   | 39.4322   | 26.8216  | 52.0427  |
| ENSG00000066136 | ENSG00000066136 | NFYC           | 1:4115731 | 64.935  | 38.572  | -0.521     | 2.952      | 0.003 | 0.043 | yes | 64.9346   | 46.5467   | 83.3225   | 38.5717   | 30.4482  | 46.6952  |
| ENSG00000226800 | ENSG00000226800 | C19orf29OS     | 19:361062 | 6.126   | 3.664   | -0.514     | 2.924      | 0.003 | 0.047 | yes | 6.12596   | 4.78808   | 7.46384   | 3.66354   | 2.65379  | 4.67329  |
| ENSG00000134014 | ENSG00000134014 | ELP3           | 8:2794718 | 44.023  | 26.961  | -0.49      | 2.922      | 0.003 | 0.047 | yes | 44.0233   | 32.2823   | 55.7642   | 26.9606   | 21.4685  | 32.4528  |
| ENSG00000164022 | ENSG00000164022 | AIMP1          | 4:1069654 | 18.421  | 11.452  | -0.475     | 2.958      | 0.003 | 0.043 | yes | 18.4209   | 14.879    | 21.9628   | 11.4516   | 8.50244  | 14.4008  |
| ENSG00000089775 | ENSG00000089775 | ZBTB25         | 14:648547 | 9.504   | 5.99    | -0.462     | 2.955      | 0.003 | 0.043 | yes | 9.50394   | 7.37723   | 11.6307   | 5.98986   | 4.68373  | 7.296    |
| ENSG00000215695 | ENSG00000215695 | RSC1A1         | 1:1594399 | 8.09    | 5.155   | -0.451     | 2.983      | 0.003 | 0.04  | yes | 8.08981   | 6.51858   | 9.66103   | 5.15458   | 3.9609   | 6.34826  |
| ENSG00000170144 | ENSG00000170144 | HNRNPA3        | 2:1778552 | 26.041  | 17.742  | -0.384     | 2.985      | 0.003 | 0.04  | yes | 26.0412   | 21.3386   | 30.7439   | 17.7421   | 14.4947  | 20.9896  |
| ENSG00000170873 | ENSG00000170873 | MTSS1          | 8:1255007 | 22.318  | 15.22   | -0.383     | 2.98       | 0.003 | 0.04  | yes | 22.3177   | 19.4824   | 25.153    | 15.2197   | 11.8206  | 18.6188  |
| ENSG00000168818 | ENSG00000168818 | STX18          | 4:4349866 | 27.034  | 19.045  | -0.35      | 2.989      | 0.003 | 0.039 | yes | 27.0335   | 23.0081   | 31.059    | 19.0446   | 15.5972  | 22.4921  |
| ENSG00000105675 | ENSG00000105675 | ATP4A          | 19:360410 | 11.565  | 8.399   | -0.32      | 2.996      | 0.003 | 0.038 | yes | 11.565    | 9.92503   | 13.205    | 8.3989    | 7.05818  | 9.73962  |
| ENSG00000235590 | ENSG00000235590 | GNAS-AS1       | 20:573939 | 42.762  | 31.113  | -0.318     | 2.964      | 0.003 | 0.042 | yes | 42.7619   | 36.6718   | 48.8519   | 31.1131   | 26.1205  | 36.1057  |
| ENSG00000133943 | ENSG00000133943 | C14orf159      | 14:913367 | 15.282  | 11.238  | -0.307     | 2.938      | 0.003 | 0.045 | yes | 15.2815   | 13.1539   | 17.4092   | 11.2381   | 9.48338  | 12.9928  |
| ENSG00000233558 | ENSG00000233558 | RP3-486I3.4    | 6:1165753 | 114.109 | 85.084  | -0.294     | 2.928      | 0.003 | 0.047 | yes | 114.109   | 98.813    | 129.405   | 85.084    | 72.4007  | 97.7672  |
| ENSG00000166200 | ENSG00000166200 | COPS2          | 15:494174 | 11.349  | 8.525   | -0.286     | 2.987      | 0.003 | 0.039 | yes | 11.3491   | 9.78781   | 12.9103   | 8.52484   | 7.38801  | 9.66168  |

|                 |                 |               |           |         |         |            |            |          |          |     |          |          |          |         |         |         |
|-----------------|-----------------|---------------|-----------|---------|---------|------------|------------|----------|----------|-----|----------|----------|----------|---------|---------|---------|
| ENSG00000204209 | ENSG00000204209 | DAXX          | 6:3328633 | 134.173 | 102.334 | -0.271     | 2.932      | 0.003    | 0.046    | yes | 134.173  | 113.208  | 155.139  | 102.334 | 92.2345 | 112.433 |
| ENSG00000112079 | ENSG00000112079 | STK38         | 6:3646166 | 29.866  | 23.385  | -0.245     | 2.95       | 0.003    | 0.044    | yes | 29.8656  | 26.4998  | 33.2314  | 23.3852 | 20.54   | 26.2304 |
| ENSG00000172534 | ENSG00000172534 | HCFC1         | X:1532130 | 114.268 | 89.7    | -0.242     | 2.922      | 0.003    | 0.047    | yes | 114.268  | 100.942  | 127.594  | 89.7002 | 79.1439 | 100.257 |
| ENSG00000161179 | ENSG00000161179 | YDJC          | 22:219823 | 104.886 | 82.58   | -0.239     | 2.944      | 0.003    | 0.044    | yes | 104.886  | 92.4463  | 117.326  | 82.5804 | 73.4178 | 91.743  |
| ENSG00000151148 | ENSG00000151148 | UBE3B         | 12:109826 | 57.402  | 45.745  | -0.227     | 2.926      | 0.003    | 0.047    | yes | 57.4017  | 51.9016  | 62.9019  | 45.7451 | 40.164  | 51.3263 |
| ENSG00000173281 | ENSG00000173281 | PPP1R3B       | 8:8993764 | 20.891  | 16.659  | -0.226     | 2.936      | 0.003    | 0.045    | yes | 20.8914  | 18.7215  | 23.0612  | 16.6592 | 14.7602 | 18.5581 |
| ENSG00000103037 | ENSG00000103037 | SETD6         | 16:585493 | 90.787  | 72.665  | -0.223     | 2.945      | 0.003    | 0.044    | yes | 90.7872  | 81.7658  | 99.8085  | 72.6647 | 64.3819 | 80.9475 |
| ENSG00000130717 | ENSG00000130717 | UCK1          | 9:1343782 | 88.451  | 70.81   | -0.222     | 2.999      | 0.003    | 0.038    | yes | 88.4513  | 78.141   | 98.7616  | 70.81   | 64.3126 | 77.3073 |
| ENSG00000196372 | ENSG00000196372 | ASB13         | 10:568082 | 174.972 | 140.729 | -0.218     | 2.949      | 0.003    | 0.044    | yes | 174.972  | 157.518  | 192.427  | 140.729 | 125.396 | 156.063 |
| ENSG00000005007 | ENSG00000005007 | UPF1          | 19:189427 | 101.494 | 83.855  | -0.191     | 2.986      | 0.003    | 0.039    | yes | 101.494  | 92.4212  | 110.567  | 83.8551 | 76.1883 | 91.5219 |
| ENSG00000122952 | ENSG00000122952 | ZWINT         | 10:581169 | 187.854 | 155.884 | -0.187     | 2.989      | 0.003    | 0.039    | yes | 187.854  | 170.018  | 205.69   | 155.884 | 143.252 | 168.516 |
| ENSG00000183283 | ENSG00000183283 | DAZAP2        | 12:516320 | 260.461 | 219.743 | -0.17      | 3.019      | 0.003    | 0.036    | yes | 260.461  | 240.604  | 280.318  | 219.743 | 201.534 | 237.953 |
| ENSG00000161642 | ENSG00000161642 | ZNF385A       | 12:547474 | 152.202 | 128.805 | -0.167     | 2.979      | 0.003    | 0.04     | yes | 152.202  | 140.734  | 163.669  | 128.805 | 118.122 | 139.487 |
| ENSG00000242583 | ENSG00000242583 | RP11-379K17.9 | 3:1697557 | 1.441   | 0       | -1.79769e+ | -1.79769e+ | 0.003    | 0.039    | yes | 1.44089  | 0.402497 | 2.47928  | 0       | 0       | 0       |
| ENSG00000251639 | ENSG00000251639 | RP11-20I20.1  | 4:1050037 | 0.739   | 0       | -1.79769e+ | -1.79769e+ | 0.003    | 0.04     | yes | 0.738571 | 0.203002 | 1.27414  | 0       | 0       | 0       |
| ENSG00000259133 | ENSG00000259133 | RP11-1085N6.3 | 14:569550 | 2.189   | 0       | -1.79769e+ | -1.79769e+ | 0.003    | 0.04     | yes | 2.18927  | 0.606416 | 3.77213  | 0       | 0       | 0       |
| ENSG00000061455 | ENSG00000061455 | PRDM6         | 5:1224229 | 10.029  | 3.128   | -1.165     | 2.919      | 0.004    | 0.048    | yes | 10.0286  | 3.64268  | 16.4145  | 3.12822 | 1.6228  | 4.63364 |
| ENSG00000186352 | ENSG00000186352 | ANKRD37       | 4:1863171 | 8.247   | 2.891   | -1.048     | 2.909      | 0.004    | 0.049    | yes | 8.24749  | 5.42123  | 11.0738  | 2.89106 | 1.05775 | 4.72437 |
| ENSG00000182575 | ENSG00000182575 | NXPH3         | 17:475726 | 4.553   | 2.677   | -0.531     | 2.908      | 0.004    | 0.049    | yes | 4.55333  | 3.55131  | 5.55535  | 2.67705 | 1.8963  | 3.45779 |
| ENSG00000257108 | ENSG00000257108 | NHLRC4        | 16:616994 | 5.078   | 3.126   | -0.485     | 2.913      | 0.004    | 0.048    | yes | 5.07811  | 4.06708  | 6.08915  | 3.12628 | 2.29177 | 3.9608  |
| ENSG00000125733 | ENSG00000125733 | TRIP10        | 19:673969 | 88.638  | 59.327  | -0.401     | 2.915      | 0.004    | 0.048    | yes | 88.6381  | 68.886   | 108.39   | 59.3273 | 49.7205 | 68.934  |
| ENSG00000112339 | ENSG00000112339 | HBS1L         | 6:1352815 | 53.622  | 39.841  | -0.297     | 2.911      | 0.004    | 0.049    | yes | 53.622   | 46.5563  | 60.6877  | 39.8412 | 33.6304 | 46.0519 |
| ENSG00000233016 | ENSG00000233016 | SNHG7         | 9:1396070 | 39.393  | 29.427  | -0.292     | 2.908      | 0.004    | 0.049    | yes | 39.3929  | 34.2458  | 44.54    | 29.4266 | 24.9467 | 33.9065 |
| ENSG00000010256 | ENSG00000010256 | UQCRC1        | 3:4863643 | 412.61  | 359.839 | -0.137     | 2.904      | 0.004    | 0.05     | yes | 412.61   | 384.709  | 440.512  | 359.839 | 336.208 | 383.47  |
| ENSG00000140416 | ENSG00000140416 | TPM1          | 15:633348 | 450.536 | 395.21  | -0.131     | 2.911      | 0.004    | 0.049    | yes | 450.536  | 424.424  | 476.648  | 395.21  | 367.986 | 422.434 |
| ENSG00000229674 | ENSG00000229674 | AL121578.7    | X:3720852 | 0.123   | 0       | -1.79769e+ | -1.79769e+ | 2.885429 | 3.236449 | yes | 0.122716 | 0.116257 | 0.129175 | 0       | 0       | 0       |
| ENSG00000224386 | ENSG00000224386 | AC090939.2    | 3:1131399 | 0.29    | 0       | -1.79769e+ | -1.79769e+ | 8.649330 | 9.65954e | yes | 0.289835 | 0.274496 | 0.305175 | 0       | 0       | 0       |
