# Supplementary material for: Prosaposin activates the androgen receptor and potentiates resistance to endocrine treatment in breast cancer
Source: Springer Nature journal article supplement (doi:10.1186/s13058-015-0636-6), 2015-09-04
Supplement: MOESM3 [file 9781562]

| test_id         | gene_id         | gene          | locus     | sample_1 | sample_2 | ln.fold_cha | test_stat | p_value | q_value | significant | q1_FPKM   | q1_conf_lo | q1_conf_hi | q2_FPKM   | q2_conf_lo | q2_conf_hi |
|-----------------|-----------------|---------------|-----------|----------|----------|-------------|-----------|---------|---------|-------------|-----------|------------|------------|-----------|------------|------------|
| ENSG00000254088 | ENSG00000254088 | CTD-3083F21.5 | 8:8734550 | q1       | q2       | 0.138       | -6.064    | 0       | 0       | yes         | 0.0653416 | 0.0632964  | 0.0673868  | 0.0750096 | 0.0725312  | 0.077488   |
| ENSG00000148180 | ENSG00000148180 | GSN           | 9:1239404 | q1       | q2       | 0.143       | -3.541    | 0       | 0.007   | yes         | 266.804   | 252.157    | 281.452    | 307.83    | 289.588    | 326.072    |
| ENSG00000127022 | ENSG00000127022 | CANX          | 5:1791055 | q1       | q2       | 0.174       | -4.529    | 0       | 0       | yes         | 1501.79   | 1420.2     | 1583.37    | 1786.8    | 1689.95    | 1883.65    |
| ENSG00000109685 | ENSG00000109685 | WHSC1         | 4:1873150 | q1       | q2       | 0.176       | -3.838    | 0       | 0.003   | yes         | 219.244   | 204.592    | 233.897    | 261.558   | 245.033    | 278.083    |
| ENSG00000238300 | ENSG00000238300 | SNORD121B     | 9:3392169 | q1       | q2       | 0.176       | -4.437    | 0       | 0       | yes         | 23.4885   | 22.1984    | 24.7786    | 28.0206   | 26.4088    | 29.6323    |
| ENSG00000065361 | ENSG00000065361 | ERBB3         | 12:564736 | q1       | q2       | 0.18        | -3.662    | 0       | 0.005   | yes         | 558.411   | 520.192    | 596.631    | 668.321   | 621.329    | 715.313    |
| ENSG00000075415 | ENSG00000075415 | SLC25A3       | 12:989873 | q1       | q2       | 0.183       | -4.012    | 0       | 0.001   | yes         | 610.908   | 573.155    | 648.661    | 733.341   | 684.291    | 782.39     |
| ENSG00000121716 | ENSG00000121716 | PILRB         | 7:9990532 | q1       | q2       | 0.183       | -4.205    | 0       | 0.001   | yes         | 252.223   | 236.658    | 267.787    | 302.945   | 284.3      | 321.591    |
| ENSG00000236658 | ENSG00000236658 | RP11-83J21.3  | 9:1337778 | q1       | q2       | 0.192       | -3.823    | 0       | 0.003   | yes         | 0.261529  | 0.243724   | 0.279334   | 0.316762  | 0.293458   | 0.340067   |
| ENSG00000250893 | ENSG00000250893 | RP11-588L15.2 | 4:4042527 | q1       | q2       | 0.201       | -5.087    | 0       | 0       | yes         | 0.0553138 | 0.0523497  | 0.0582778  | 0.0676364 | 0.0637034  | 0.0715693  |
| ENSG00000142949 | ENSG00000142949 | PTPRF         | 1:4399085 | q1       | q2       | 0.202       | -3.755    | 0       | 0.003   | yes         | 319.859   | 297.485    | 342.232    | 391.345   | 359.429    | 423.26     |
| ENSG00000077097 | ENSG00000077097 | TOP2B         | 3:2563947 | q1       | q2       | 0.203       | -4.017    | 0       | 0.001   | yes         | 201.972   | 187.025    | 216.919    | 247.54    | 230.419    | 264.662    |
| ENSG00000099622 | ENSG00000099622 | CIRBP         | 19:126926 | q1       | q2       | 0.207       | -3.513    | 0       | 0.008   | yes         | 151.313   | 138.795    | 163.832    | 186.024   | 170.48     | 201.568    |
| ENSG00000092841 | ENSG00000092841 | MYL6          | 12:565445 | q1       | q2       | 0.21        | -4.928    | 0       | 0       | yes         | 841.64    | 790.789    | 892.492    | 1038.19   | 975.85     | 1100.53    |
| ENSG00000147677 | ENSG00000147677 | EIF3H         | 8:1176543 | q1       | q2       | 0.21        | -3.963    | 0       | 0.002   | yes         | 241.053   | 222.892    | 259.215    | 297.505   | 275.248    | 319.762    |
| ENSG00000168394 | ENSG00000168394 | TAP1          | 6:3280849 | q1       | q2       | 0.213       | -3.845    | 0       | 0.002   | yes         | 78.2332   | 72.0466    | 84.4197    | 96.7631   | 89.2844    | 104.242    |
| ENSG00000156482 | ENSG00000156482 | RPL30         | 8:9888106 | q1       | q2       | 0.215       | -4.7      | 0       | 0       | yes         | 1552.52   | 1452.15    | 1652.9     | 1924.03   | 1800.01    | 2048.05    |
| ENSG00000012963 | ENSG00000012963 | UBR7          | 14:936512 | q1       | q2       | 0.218       | -3.676    | 0       | 0.005   | yes         | 215.636   | 197.395    | 233.876    | 268.288   | 245.886    | 290.69     |
| ENSG00000104320 | ENSG00000104320 | NBN           | 8:9094556 | q1       | q2       | 0.218       | -3.876    | 0       | 0.002   | yes         | 122.891   | 113.066    | 132.716    | 152.9     | 140.749    | 165.052    |
| ENSG00000114503 | ENSG00000114503 | NCBP2         | 3:1966622 | q1       | q2       | 0.221       | -3.719    | 0       | 0.004   | yes         | 168.246   | 153.756    | 182.735    | 209.898   | 192.675    | 227.121    |
| ENSG00000186298 | ENSG00000186298 | PPP1CC        | 12:111157 | q1       | q2       | 0.226       | -3.533    | 0       | 0.007   | yes         | 161.38    | 146.925    | 175.834    | 202.39    | 183.834    | 220.946    |
| ENSG00000168883 | ENSG00000168883 | USP39         | 2:8582567 | q1       | q2       | 0.229       | -4.104    | 0       | 0.001   | yes         | 274.572   | 254.056    | 295.088    | 345.299   | 316.635    | 373.963    |
| ENSG00000125991 | ENSG00000125991 | ERGIC3        | 20:341297 | q1       | q2       | 0.233       | -6.004    | 0       | 0       | yes         | 682.596   | 647.309    | 717.882    | 861.509   | 811.723    | 911.294    |
| ENSG00000197451 | ENSG00000197451 | HNRNPAB       | 5:1776315 | q1       | q2       | 0.233       | -4.593    | 0       | 0       | yes         | 291.289   | 268.866    | 313.713    | 367.555   | 343.372    | 391.737    |
| ENSG00000204498 | ENSG00000204498 | NFKBIL1       | 6:3149649 | q1       | q2       | 0.233       | -3.711    | 0       | 0.004   | yes         | 74.0863   | 67.2994    | 80.8732    | 93.5382   | 85.4951    | 101.581    |
| ENSG00000111331 | ENSG00000111331 | OAS3          | 12:113344 | q1       | q2       | 0.234       | -5.26     | 0       | 0       | yes         | 300.426   | 281.054    | 319.798    | 379.639   | 356.362    | 402.916    |
| ENSG00000245532 | ENSG00000245532 | NEAT1         | 11:651902 | q1       | q2       | 0.234       | -3.496    | 0       | 0.008   | yes         | 124.508   | 112.61     | 136.406    | 157.33    | 142.586    | 172.074    |
| ENSG00000100316 | ENSG00000100316 | RPL3          | 22:397088 | q1       | q2       | 0.236       | -3.671    | 0       | 0.005   | yes         | 232.2     | 207.98     | 256.42     | 294.043   | 271.907    | 316.179    |
| ENSG00000156508 | ENSG00000156508 | EEF1A1        | 6:7422547 | q1       | q2       | 0.241       | -5.068    | 0       | 0       | yes         | 318.631   | 296.894    | 340.368    | 405.581   | 378.636    | 432.527    |
| ENSG00000196542 | ENSG00000196542 | SPTSSB        | 3:1610625 | q1       | q2       | 0.241       | -4.286    | 0       | 0       | yes         | 292.816   | 268.92     | 316.712    | 372.583   | 343.774    | 401.393    |
| ENSG00000130589 | ENSG00000130589 | RP4-697K14.7  | 20:621894 | q1       | q2       | 0.243       | -4.765    | 0       | 0       | yes         | 64.1454   | 59.4528    | 68.8379    | 81.8203   | 75.9861    | 87.6544    |
| ENSG00000110851 | ENSG00000110851 | PRDM4         | 12:108126 | q1       | q2       | 0.246       | -4.502    | 0       | 0       | yes         | 138.171   | 127.6      | 148.741    | 176.752   | 162.93     | 190.573    |
| ENSG00000213281 | ENSG00000213281 | NRAS          | 1:1152470 | q1       | q2       | 0.246       | -3.716    | 0       | 0.004   | yes         | 67.9163   | 61.5001    | 74.3325    | 86.8712   | 78.8014    | 94.941     |
| ENSG00000166710 | ENSG00000166710 | B2M           | 15:450036 | q1       | q2       | 0.249       | -3.729    | 0       | 0.004   | yes         | 489.045   | 441.975    | 536.114    | 627.431   | 569.256    | 685.606    |
| ENSG00000229117 | ENSG00000229117 | RPL41         | 12:565103 | q1       | q2       | 0.249       | -4.59     | 0       | 0       | yes         | 1829.9    | 1692.94    | 1966.86    | 2347.77   | 2163.04    | 2532.5     |
| ENSG00000100234 | ENSG00000100234 | TIMP3         | 22:329085 | q1       | q2       | 0.25        | -3.527    | 0       | 0.008   | yes         | 39.2913   | 35.6224    | 42.9601    | 50.4293   | 45.0662    | 55.7925    |
| ENSG00000109854 | ENSG00000109854 | HTATIP2       | 11:203852 | q1       | q2       | 0.25        | -3.928    | 0       | 0.002   | yes         | 101.935   | 92.7618    | 111.108    | 130.932   | 119.11     | 142.753    |
| ENSG00000198431 | ENSG00000198431 | TXNRD1        | 12:104609 | q1       | q2       | 0.251       | -5.476    | 0       | 0       | yes         | 246.484   | 229.866    | 263.103    | 316.952   | 297.19     | 336.715    |
| ENSG00000104549 | ENSG00000104549 | SQLE          | 8:1260107 | q1       | q2       | 0.254       | -3.485    | 0       | 0.009   | yes         | 112.345   | 100.777    | 123.913    | 144.893   | 129.896    | 159.89     |
| ENSG00000215301 | ENSG00000215301 | DDX3X         | X:4119265 | q1       | q2       | 0.254       | -4.097    | 0       | 0.001   | yes         | 57.1094   | 52.1342    | 62.0846    | 73.5882   | 67.1204    | 80.056     |
| ENSG00000115415 | ENSG00000115415 | STAT1         | 2:1917455 | q1       | q2       | 0.256       | -6.145    | 0       | 0       | yes         | 384.915   | 361.753    | 408.077    | 497.436   | 468.668    | 526.205    |
| ENSG00000242517 | ENSG00000242517 | AC018607.3    | 8:5675503 | q1       | q2       | 0.257       | -3.837    | 0       | 0.003   | yes         | 2392.65   | 2163.94    | 2621.35    | 3093.48   | 2803.44    | 3383.51    |
| ENSG00000071082 | ENSG00000071082 | RPL31         | 2:1014366 | q1       | q2       | 0.258       | -3.651    | 0       | 0.005   | yes         | 613.624   | 551.473    | 675.774    | 794.203   | 715.957    | 872.449    |
| ENSG00000105397 | ENSG00000105397 | TYK2          | 19:104612 | q1       | q2       | 0.261       | -3.837    | 0       | 0.003   | yes         | 243.592   | 218.957    | 268.228    | 316.285   | 287.464    | 345.106    |
| ENSG00000182934 | ENSG00000182934 | SRPR          | 11:126071 | q1       | q2       | 0.261       | -4.455    | 0       | 0       | yes         | 105.6     | 96.5743    | 114.626    | 137.047   | 126.095    | 147.998    |
| ENSG00000163126 | ENSG00000163126 | ANKRD23       | 2:9748198 | q1       | q2       | 0.268       | -3.861    | 0       | 0.002   | yes         | 30.9762   | 27.8678    | 34.0845    | 40.5154   | 36.6156    | 44.4151    |
| ENSG00000104388 | ENSG00000104388 | RAB2A         | 8:6142941 | q1       | q2       | 0.269       | -3.667    | 0       | 0.005   | yes         | 145.17    | 129.821    | 160.519    | 189.96    | 170.649    | 209.271    |
| ENSG00000121152 | ENSG00000121152 | NCAPH         | 2:9700152 | q1       | q2       | 0.27        | -3.494    | 0       | 0.008   | yes         | 66.0496   | 58.6367    | 73.4626    | 86.5119   | 77.3276    | 95.6962    |
| ENSG00000124201 | ENSG00000124201 | ZNF1          | 20:478269 | q1       | q2       | 0.271       | -3.793    | 0       | 0.003   | yes         | 24.3481   | 21.8589    | 26.8373    | 31.9296   | 28.7397    | 35.1195    |

|                 |                 |               |            |    |    |       |         |   |           |           |           |            |           |           |           |
|-----------------|-----------------|---------------|------------|----|----|-------|---------|---|-----------|-----------|-----------|------------|-----------|-----------|-----------|
| ENSG00000104529 | ENSG00000104529 | EEF1D         | 8:1446618  | q1 | q2 | 0.272 | -5.54   | 0 | 0 yes     | 291.101   | 271.7     | 310.502    | 382.251   | 354.611   | 409.891   |
| ENSG00000104325 | ENSG00000104325 | DECR1         | 8:9094556  | q1 | q2 | 0.274 | -4.61   | 0 | 0 yes     | 205.44    | 188.311   | 222.568    | 270.063   | 247.262   | 292.864   |
| ENSG00000066583 | ENSG00000066583 | ISOC1         | 5:1284303  | q1 | q2 | 0.278 | -4.357  | 0 | 0 yes     | 131.958   | 119.8     | 144.116    | 174.225   | 158.855   | 189.595   |
| ENSG00000148303 | ENSG00000148303 | RPL7A         | 9:1362150  | q1 | q2 | 0.281 | -4.879  | 0 | 0 yes     | 254.209   | 235.548   | 272.869    | 336.609   | 306.767   | 366.451   |
| ENSG00000249915 | ENSG00000249915 | PDCD6         | 5:271735-4 | q1 | q2 | 0.282 | -3.578  | 0 | 0.006 yes | 145.411   | 128.893   | 161.93     | 192.704   | 171.711   | 213.696   |
| ENSG00000060656 | ENSG00000060656 | PTPRU         | 1:2956302  | q1 | q2 | 0.284 | -3.543  | 0 | 0.007 yes | 56.6664   | 50.1764   | 63.1564    | 75.2706   | 66.8348   | 83.7064   |
| ENSG00000130638 | ENSG00000130638 | ATXN10        | 22:460676  | q1 | q2 | 0.287 | -3.9    | 0 | 0.002 yes | 90.9703   | 81.3846   | 100.556    | 121.266   | 108.765   | 133.767   |
| ENSG00000145014 | ENSG00000145014 | TMEM44        | 3:1943047  | q1 | q2 | 0.289 | -3.622  | 0 | 0.005 yes | 42.2306   | 36.9308   | 47.5305    | 56.3977   | 50.8244   | 61.9711   |
| ENSG00000063177 | ENSG00000063177 | RPL18         | 19:491185  | q1 | q2 | 0.291 | -5.728  | 0 | 0 yes     | 420.757   | 389.528   | 451.986    | 562.849   | 523.811   | 601.886   |
| ENSG00000035115 | ENSG00000035115 | SH3YL1        | 2:217729-2 | q1 | q2 | 0.292 | -3.929  | 0 | 0.002 yes | 78.0407   | 69.125    | 86.9563    | 104.529   | 94.5707   | 114.488   |
| ENSG00000213741 | ENSG00000213741 | RPS29         | 14:500433  | q1 | q2 | 0.296 | -4.217  | 0 | 0.001 yes | 1786.86   | 1607.04   | 1966.68    | 2401.85   | 2167.09   | 2636.61   |
| ENSG00000117632 | ENSG00000117632 | STMN1         | 1:2621067  | q1 | q2 | 0.301 | -3.632  | 0 | 0.005 yes | 78.5976   | 68.7119   | 88.4833    | 106.151   | 94.7368   | 117.566   |
| ENSG00000257298 | ENSG00000257298 | RP3-405J10.3  | 12:505695  | q1 | q2 | 0.303 | -4.772  | 0 | 0 yes     | 0.007575  | 0.0068906 | 0.00825942 | 0.0102592 | 0.0093416 | 0.0111768 |
| ENSG00000115211 | ENSG00000115211 | EIF2B4        | 2:2750525  | q1 | q2 | 0.304 | -5.364  | 0 | 0 yes     | 119.488   | 109.051   | 129.924    | 161.917   | 150.23    | 173.605   |
| ENSG00000138496 | ENSG00000138496 | PARP9         | 3:1222468  | q1 | q2 | 0.308 | -4.798  | 0 | 0 yes     | 51.5617   | 46.6803   | 56.4431    | 70.1782   | 64.0808   | 76.2756   |
| ENSG00000198804 | ENSG00000198804 | MT-CO1        | MT:5903-7  | q1 | q2 | 0.311 | -4.147  | 0 | 0.001 yes | 92.0499   | 82.0905   | 102.009    | 125.662   | 112.586   | 138.738   |
| ENSG00000198840 | ENSG00000198840 | MT-ND3        | MT:10058-  | q1 | q2 | 0.312 | -4.981  | 0 | 0 yes     | 3783.89   | 3446.62   | 4121.17    | 5171.85   | 4715.17   | 5628.52   |
| ENSG00000084234 | ENSG00000084234 | APLP2         | 11:129939  | q1 | q2 | 0.317 | -6.572  | 0 | 0 yes     | 434.186   | 401.741   | 466.631    | 596.26    | 559.827   | 632.693   |
| ENSG00000147684 | ENSG00000147684 | NDUFB9        | 8:1255007  | q1 | q2 | 0.318 | -4.891  | 0 | 0 yes     | 213.408   | 193.247   | 233.568    | 293.33    | 267.101   | 319.559   |
| ENSG00000244097 | ENSG00000244097 | RP11-411G7.1  | 17:411907  | q1 | q2 | 0.318 | -6.376  | 0 | 0 yes     | 0.107101  | 0.09967   | 0.114531   | 0.147258  | 0.136679  | 0.157838  |
| ENSG00000074582 | ENSG00000074582 | BCS1L         | 2:2195026  | q1 | q2 | 0.321 | -4.568  | 0 | 0 yes     | 85.8338   | 77.2009   | 94.4668    | 118.335   | 106.712   | 129.959   |
| ENSG00000106608 | ENSG00000106608 | URGCP         | 7:4391549  | q1 | q2 | 0.322 | -4.338  | 0 | 0 yes     | 55.0616   | 49.5931   | 60.5301    | 75.9832   | 67.5949   | 84.3716   |
| ENSG00000215845 | ENSG00000215845 | TSTD1         | 1:1609650  | q1 | q2 | 0.326 | -4.758  | 0 | 0 yes     | 202.935   | 182.178   | 223.691    | 281.134   | 255.504   | 306.764   |
| ENSG00000135317 | ENSG00000135317 | SNX14         | 6:8621521  | q1 | q2 | 0.327 | -3.511  | 0 | 0.008 yes | 97.6396   | 84.1754   | 111.104    | 135.432   | 118.453   | 152.412   |
| ENSG00000143379 | ENSG00000143379 | SETDB1        | 1:1508987  | q1 | q2 | 0.331 | -5.395  | 0 | 0 yes     | 99.475    | 90.7345   | 108.216    | 138.511   | 126.645   | 150.377   |
| ENSG00000116857 | ENSG00000116857 | TMEM9         | 1:2011038  | q1 | q2 | 0.332 | -5.455  | 0 | 0 yes     | 154.371   | 142.42    | 166.321    | 215.075   | 194.906   | 235.243   |
| ENSG00000128595 | ENSG00000128595 | CALU          | 7:1283793  | q1 | q2 | 0.333 | -4.067  | 0 | 0.001 yes | 52.372    | 46.9089   | 57.8351    | 73.0973   | 63.8509   | 82.3437   |
| ENSG00000227638 | ENSG00000227638 | HNRNPA1P14    | 9:9100333  | q1 | q2 | 0.333 | -6.976  | 0 | 0 yes     | 0.132466  | 0.123615  | 0.141316   | 0.184724  | 0.172163  | 0.197286  |
| ENSG00000003056 | ENSG00000003056 | M6PR          | 12:906649  | q1 | q2 | 0.334 | -4.041  | 0 | 0.001 yes | 152.664   | 137.144   | 168.184    | 213.199   | 185.41    | 240.988   |
| ENSG00000122565 | ENSG00000122565 | CBX3          | 7:2622954  | q1 | q2 | 0.335 | -3.809  | 0 | 0.003 yes | 24.4464   | 21.289    | 27.6038    | 34.1862   | 30.0949   | 38.2774   |
| ENSG00000167635 | ENSG00000167635 | ZNF146        | 19:366731  | q1 | q2 | 0.337 | -3.863  | 0 | 0.002 yes | 9.76752   | 8.51166   | 11.0234    | 13.6799   | 12.0674   | 15.2924   |
| ENSG00000166598 | ENSG00000166598 | HSP90B1       | 12:104235  | q1 | q2 | 0.338 | -5.24   | 0 | 0 yes     | 119.713   | 108.82    | 130.605    | 167.822   | 152.492   | 183.152   |
| ENSG00000228779 | ENSG00000228779 | Z69666.2      | 16:127005  | q1 | q2 | 0.346 | -13.598 | 0 | 0 yes     | 0.0245901 | 0.023726  | 0.0254543  | 0.0347725 | 0.0334892 | 0.0360558 |
| ENSG00000129484 | ENSG00000129484 | PARP2         | 14:208112  | q1 | q2 | 0.348 | -3.622  | 0 | 0.005 yes | 36.4066   | 31.2439   | 41.5694    | 51.5452   | 44.875    | 58.2154   |
| ENSG00000111335 | ENSG00000111335 | OAS2          | 12:113344  | q1 | q2 | 0.352 | -6.292  | 0 | 0 yes     | 159.191   | 146.148   | 172.235    | 226.287   | 209.079   | 243.495   |
| ENSG00000176444 | ENSG00000176444 | CLK2          | 1:1552326  | q1 | q2 | 0.353 | -4.137  | 0 | 0.001 yes | 52.0518   | 45.3076   | 58.796     | 74.0722   | 65.8585   | 82.2859   |
| ENSG00000244336 | ENSG00000244336 | RP11-479G22.3 | 10:331892  | q1 | q2 | 0.356 | -8.677  | 0 | 0 yes     | 0.107995  | 0.101905  | 0.114085   | 0.154195  | 0.144996  | 0.163393  |
| ENSG00000170889 | ENSG00000170889 | RPS9          | 19:547046  | q1 | q2 | 0.357 | -4.938  | 0 | 0 yes     | 66.9488   | 59.9392   | 73.9585    | 95.6346   | 86.1217   | 105.148   |
| ENSG00000135245 | ENSG00000135245 | C7orf68       | 7:1280958  | q1 | q2 | 0.358 | -3.866  | 0 | 0.002 yes | 34.8293   | 30.1179   | 39.5407    | 49.8044   | 43.5178   | 56.091    |
| ENSG00000133193 | ENSG00000133193 | FAM104A       | 17:711887  | q1 | q2 | 0.361 | -4.081  | 0 | 0.001 yes | 16.5171   | 14.3284   | 18.7058    | 23.7095   | 20.9213   | 26.4978   |
| ENSG00000067182 | ENSG00000067182 | TNFRSF1A      | 12:643792  | q1 | q2 | 0.362 | -4.977  | 0 | 0 yes     | 136.666   | 124.374   | 148.957    | 196.207   | 173.813   | 218.6     |
| ENSG00000176532 | ENSG00000176532 | PRR15         | 7:2960342  | q1 | q2 | 0.364 | -3.523  | 0 | 0.008 yes | 50.1918   | 41.7147   | 58.669     | 72.253    | 63.6285   | 80.8776   |
| ENSG00000172819 | ENSG00000172819 | RARG          | 12:536043  | q1 | q2 | 0.368 | -4.262  | 0 | 0 yes     | 108.018   | 94.8999   | 121.137    | 156.119   | 136.92    | 175.317   |
| ENSG00000109046 | ENSG00000109046 | WSB1          | 17:256211  | q1 | q2 | 0.37  | -4.484  | 0 | 0 yes     | 25.9011   | 22.7393   | 29.0629    | 37.5032   | 33.3337   | 41.6726   |
| ENSG00000127399 | ENSG00000127399 | LRRC61        | 7:1499410  | q1 | q2 | 0.37  | -3.569  | 0 | 0.007 yes | 17.5906   | 15.0793   | 20.102     | 25.4566   | 21.6373   | 29.2759   |
| ENSG00000143776 | ENSG00000143776 | CDC42BPA      | 1:2271775  | q1 | q2 | 0.37  | -3.667  | 0 | 0.005 yes | 6.46025   | 5.71098   | 7.20953    | 9.35174   | 7.80829   | 10.8952   |
| ENSG00000135722 | ENSG00000135722 | FBXL8         | 16:671938  | q1 | q2 | 0.374 | -4.306  | 0 | 0 yes     | 47.9104   | 41.8484   | 53.9725    | 69.6598   | 61.3559   | 77.9637   |
| ENSG00000139637 | ENSG00000139637 | C12orf10      | 12:536890  | q1 | q2 | 0.374 | -5.537  | 0 | 0 yes     | 83.3832   | 74.6131   | 92.1532    | 121.17    | 110.916   | 131.424   |
| ENSG00000072518 | ENSG00000072518 | MARK2         | 11:636063  | q1 | q2 | 0.375 | -4.541  | 0 | 0 yes     | 44.9726   | 40.9514   | 48.9938    | 65.4346   | 56.3477   | 74.5215   |
| ENSG00000124942 | ENSG00000124942 | AHNAK         | 11:622010  | q1 | q2 | 0.377 | -5.151  | 0 | 0 yes     | 99.0161   | 87.5144   | 110.518    | 144.404   | 131.508   | 157.299   |

|                 |                 |              |           |    |    |       |        |   |       |     |          |           |           |          |          |          |
|-----------------|-----------------|--------------|-----------|----|----|-------|--------|---|-------|-----|----------|-----------|-----------|----------|----------|----------|
| ENSG00000129810 | ENSG00000129810 | SGOL1        | 3:2020208 | q1 | q2 | 0.38  | -3.795 | 0 | 0.003 | yes | 16.0828  | 13.6479   | 18.5176   | 23.5275  | 20.4346  | 26.6203  |
| ENSG00000165533 | ENSG00000165533 | TTC8         | 14:892904 | q1 | q2 | 0.382 | -5.117 | 0 | 0     | yes | 76.539   | 69.3122   | 83.7658   | 112.191  | 99.1927  | 125.189  |
| ENSG00000089159 | ENSG00000089159 | PXN          | 12:120639 | q1 | q2 | 0.384 | -7.632 | 0 | 0     | yes | 122.669  | 113.708   | 131.63    | 180.094  | 167.631  | 192.557  |
| ENSG00000143375 | ENSG00000143375 | CGN          | 1:1514829 | q1 | q2 | 0.385 | -4.945 | 0 | 0     | yes | 177.584  | 154.407   | 200.761   | 260.935  | 238.81   | 283.061  |
| ENSG00000064763 | ENSG00000064763 | FAR2         | 12:293020 | q1 | q2 | 0.392 | -3.594 | 0 | 0.006 | yes | 20.2483  | 17.1214   | 23.3752   | 29.9619  | 25.3495  | 34.5744  |
| ENSG00000120805 | ENSG00000120805 | ARL1         | 12:101786 | q1 | q2 | 0.392 | -4.688 | 0 | 0     | yes | 118.891  | 102.961   | 134.82    | 175.927  | 158.341  | 193.513  |
| ENSG00000010361 | ENSG00000010361 | FUZ          | 19:502701 | q1 | q2 | 0.393 | -4.292 | 0 | 0     | yes | 30.6322  | 26.3055   | 34.959    | 45.3722  | 40.0875  | 50.657   |
| ENSG00000093167 | ENSG00000093167 | LRRFIP2      | 3:3703482 | q1 | q2 | 0.397 | -7.075 | 0 | 0     | yes | 18.8671  | 13.7537   | 23.9805   | 28.063   | 0        | NA       |
| ENSG00000111229 | ENSG00000111229 | ARPC3        | 12:110810 | q1 | q2 | 0.398 | -4.062 | 0 | 0.001 | yes | 105.099  | 90.919    | 119.279   | 156.554  | 134.25   | 178.857  |
| ENSG00000156411 | ENSG00000156411 | C14orf2      | 14:104378 | q1 | q2 | 0.399 | -5.308 | 0 | 0     | yes | 828.436  | 738.77    | 918.102   | 1234.56  | 1105.79  | 1363.32  |
| ENSG00000110619 | ENSG00000110619 | CARS         | 11:302215 | q1 | q2 | 0.402 | -3.808 | 0 | 0.003 | yes | 17.1404  | 14.7315   | 19.5493   | 25.6145  | 21.5838  | 29.6452  |
| ENSG00000163918 | ENSG00000163918 | RFC4         | 3:1865009 | q1 | q2 | 0.403 | -4.239 | 0 | 0.001 | yes | 48.6845  | 41.7434   | 55.6256   | 72.8333  | 63.6785  | 81.9881  |
| ENSG00000175197 | ENSG00000175197 | DDIT3        | 12:578539 | q1 | q2 | 0.404 | -4.521 | 0 | 0     | yes | 35.965   | 31.0379   | 40.8921   | 53.8518  | 47.682   | 60.0216  |
| ENSG00000111669 | ENSG00000111669 | TPI1         | 12:697628 | q1 | q2 | 0.412 | -4.808 | 0 | 0     | yes | 66.7194  | 59.2188   | 74.22     | 100.733  | 87.704   | 113.762  |
| ENSG00000152778 | ENSG00000152778 | IFIT5        | 10:909733 | q1 | q2 | 0.423 | -3.724 | 0 | 0.004 | yes | 10.5977  | 8.81923   | 12.3761   | 16.1774  | 13.7002  | 18.6547  |
| ENSG00000172375 | ENSG00000172375 | C2CD2L       | 11:118967 | q1 | q2 | 0.425 | -5.279 | 0 | 0     | yes | 40.0166  | 35.1711   | 44.8622   | 61.2074  | 54.7121  | 67.7027  |
| ENSG00000112576 | ENSG00000112576 | CCND3        | 6:4190267 | q1 | q2 | 0.426 | -6.576 | 0 | 0     | yes | 165.754  | 150.657   | 180.852   | 253.899  | 230.455  | 277.342  |
| ENSG00000254964 | ENSG00000254964 | RP11-831H9.3 | 11:623696 | q1 | q2 | 0.426 | -11.42 | 0 | 0     | yes | 33.2317  | 31.4856   | 34.9777   | 50.8586  | 48.1706  | 53.5465  |
| ENSG00000258051 | ENSG00000258051 | RP11-474C8.3 | 12:485415 | q1 | q2 | 0.426 | -7.063 | 0 | 0     | yes | 0.086981 | 0.0795834 | 0.0943787 | 0.133195 | 0.121794 | 0.144595 |
| ENSG00000219545 | ENSG00000219545 | AC006465.3   | 7:7676148 | q1 | q2 | 0.428 | -4.309 | 0 | 0     | yes | 47.0215  | 40.2742   | 53.7687   | 72.1327  | 62.2257  | 82.0398  |
| ENSG00000180389 | ENSG00000180389 | ATP5EP2      | 13:285193 | q1 | q2 | 0.429 | -3.794 | 0 | 0.003 | yes | 118.863  | 98.9912   | 138.736   | 182.481  | 154.745  | 210.218  |
| ENSG00000240857 | ENSG00000240857 | RDH14        | 2:1873598 | q1 | q2 | 0.43  | -3.779 | 0 | 0.003 | yes | 17.7217  | 14.7422   | 20.7012   | 27.2499  | 23.065   | 31.4348  |
| ENSG00000175110 | ENSG00000175110 | MRPS22       | 3:1387228 | q1 | q2 | 0.431 | -4.579 | 0 | 0     | yes | 50.493   | 42.8069   | 58.1792   | 77.721   | 69.0943  | 86.3477  |
| ENSG00000168237 | ENSG00000168237 | GLYCTK       | 3:5228843 | q1 | q2 | 0.432 | -3.672 | 0 | 0.005 | yes | 8.31756  | 6.81485   | 9.82028   | 12.8108  | 10.8805  | 14.7411  |
| ENSG00000100296 | ENSG00000100296 | THOC5        | 22:299018 | q1 | q2 | 0.433 | -6.328 | 0 | 0     | yes | 66.936   | 59.6736   | 74.1984   | 103.16   | 94.5798  | 111.74   |
| ENSG00000130024 | ENSG00000130024 | PHF10        | 6:1701022 | q1 | q2 | 0.433 | -4.214 | 0 | 0.001 | yes | 10.0873  | 8.54992   | 11.6246   | 15.5494  | 13.4087  | 17.6901  |
| ENSG00000049323 | ENSG00000049323 | LTBP1        | 2:3317203 | q1 | q2 | 0.434 | -4.072 | 0 | 0.001 | yes | 39.6932  | 35.5591   | 43.8272   | 61.2532  | 49.8649  | 72.6414  |
| ENSG00000189376 | ENSG00000189376 | C8orf76      | 8:1242321 | q1 | q2 | 0.435 | -4.309 | 0 | 0     | yes | 29.6231  | 25.1591   | 34.0871   | 45.7441  | 39.6117  | 51.8765  |
| ENSG00000184979 | ENSG00000184979 | USP18        | 22:186326 | q1 | q2 | 0.437 | -4.275 | 0 | 0     | yes | 16.0267  | 13.6061   | 18.4473   | 24.812   | 21.3926  | 28.2314  |
| ENSG00000214941 | ENSG00000214941 | ZSWIM7       | 17:158798 | q1 | q2 | 0.437 | -4.82  | 0 | 0     | yes | 52.2105  | 45.0257   | 59.3954   | 80.8181  | 71.28    | 90.3561  |
| ENSG00000163743 | ENSG00000163743 | RCHY1        | 4:7640424 | q1 | q2 | 0.439 | -3.782 | 0 | 0.003 | yes | 23.7594  | 19.478    | 28.0407   | 36.8363  | 31.4615  | 42.2112  |
| ENSG00000258839 | ENSG00000258839 | MC1R         | 16:899785 | q1 | q2 | 0.439 | -3.819 | 0 | 0.003 | yes | 7.06202  | 5.85909   | 8.26495   | 10.9522  | 9.26261  | 12.6418  |
| ENSG00000204264 | ENSG00000204264 | PSMB8        | 6:3280849 | q1 | q2 | 0.444 | -6.658 | 0 | 0     | yes | 91.3814  | 82.3551   | 100.408   | 142.525  | 129.72   | 155.331  |
| ENSG00000152082 | ENSG00000152082 | MZT2B        | 2:1309089 | q1 | q2 | 0.445 | -3.567 | 0 | 0.007 | yes | 63.4122  | 51.9017   | 74.9227   | 98.9065  | 82.0089  | 115.804  |
| ENSG00000149532 | ENSG00000149532 | CPSF7        | 11:611701 | q1 | q2 | 0.448 | -8.328 | 0 | 0     | yes | 97.8711  | 90.3932   | 105.349   | 153.151  | 141.562  | 164.74   |
| ENSG00000177628 | ENSG00000177628 | GBA          | 1:1552042 | q1 | q2 | 0.448 | -3.727 | 0 | 0.004 | yes | 48.7267  | 40.2446   | 57.2088   | 76.2754  | 63.6194  | 88.9315  |
| ENSG00000085274 | ENSG00000085274 | MYNN         | 3:1694908 | q1 | q2 | 0.453 | -4.833 | 0 | 0     | yes | 6.30059  | 5.48401   | 7.11718   | 9.91307  | 8.5694   | 11.2567  |
| ENSG00000138434 | ENSG00000138434 | SSFA2        | 2:1827565 | q1 | q2 | 0.457 | -4.624 | 0 | 0     | yes | 457.007  | 389.35    | 524.664   | 721.679  | 627.235  | 816.123  |
| ENSG00000096093 | ENSG00000096093 | EFHC1        | 6:5228510 | q1 | q2 | 0.458 | -5.006 | 0 | 0     | yes | 14.218   | 12.2673   | 16.1688   | 22.4718  | 19.7544  | 25.1891  |
| ENSG00000221978 | ENSG00000221978 | CCNL2        | 1:1321090 | q1 | q2 | 0.458 | -6.606 | 0 | 0     | yes | 80.5214  | 72.9302   | 88.1127   | 127.344  | 114.375  | 140.313  |
| ENSG00000175175 | ENSG00000175175 | PPM1E        | 17:568332 | q1 | q2 | 0.46  | -4.979 | 0 | 0     | yes | 4.95612  | 4.27749   | 5.63475   | 7.85109  | 6.87696  | 8.82521  |
| ENSG00000118260 | ENSG00000118260 | CREB1        | 2:2081043 | q1 | q2 | 0.463 | -3.599 | 0 | 0.006 | yes | 16.594   | 13.1879   | 20.0001   | 26.3592  | 22.2739  | 30.4445  |
| ENSG00000142156 | ENSG00000142156 | COL6A1       | 21:474016 | q1 | q2 | 0.464 | -4.017 | 0 | 0.001 | yes | 23.5832  | 19.943    | 27.2233   | 37.5047  | 31.06    | 43.9495  |
| ENSG00000126062 | ENSG00000126062 | TMEM115      | 3:5038476 | q1 | q2 | 0.466 | -4.331 | 0 | 0     | yes | 12.7209  | 10.6882   | 14.7536   | 20.272   | 17.3498  | 23.1942  |
| ENSG00000154274 | ENSG00000154274 | C4orf19      | 4:3745556 | q1 | q2 | 0.466 | -3.818 | 0 | 0.003 | yes | 6.95623  | 5.66352   | 8.24893   | 11.0813  | 9.33071  | 12.8319  |
| ENSG00000106028 | ENSG00000106028 | SSBP1        | 7:1414041 | q1 | q2 | 0.468 | -4.97  | 0 | 0     | yes | 72.1397  | 63.5928   | 80.6866   | 115.202  | 98.3302  | 132.073  |
| ENSG00000215424 | ENSG00000215424 | MCM3AP-AS1   | 21:476491 | q1 | q2 | 0.472 | -3.867 | 0 | 0.002 | yes | 5.0881   | 4.13843   | 6.03776   | 8.15632  | 6.87398  | 9.43867  |
| ENSG00000130813 | ENSG00000130813 | C19orf66     | 19:101968 | q1 | q2 | 0.474 | -6.235 | 0 | 0     | yes | 32.7819  | 29.1284   | 36.4355   | 52.6756  | 47.2207  | 58.1305  |
| ENSG00000008988 | ENSG00000008988 | RPS20        | 8:5697985 | q1 | q2 | 0.477 | -7.165 | 0 | 0     | yes | 322.494  | 291.853   | 353.136   | 519.413  | 471.042  | 567.784  |
| ENSG00000175324 | ENSG00000175324 | LSM1         | 8:3796275 | q1 | q2 | 0.48  | -4.588 | 0 | 0     | yes | 30.2944  | 25.2957   | 35.2932   | 48.9731  | 42.6626  | 55.2837  |

|                 |                 |                 |           |    |    |       |         |   |       |       |           |           |           |           |           |           |
|-----------------|-----------------|-----------------|-----------|----|----|-------|---------|---|-------|-------|-----------|-----------|-----------|-----------|-----------|-----------|
| ENSG0000083454  | ENSG0000083454  | P2RX5           | 17:356619 | q1 | q2 | 0.484 | -5.876  | 0 | 0     | 0 yes | 24.1544   | 21.2479   | 27.0609   | 39.2057   | 34.7882   | 43.6233   |
| ENSG00000176148 | ENSG00000176148 | TCP11L1         | 11:330609 | q1 | q2 | 0.486 | -4.204  | 0 | 0.001 | yes   | 11.1362   | 9.29664   | 12.9757   | 18.1019   | 15.1759   | 21.0279   |
| ENSG00000183684 | ENSG00000183684 | THOC4           | 17:798457 | q1 | q2 | 0.488 | -5.789  | 0 | 0     | 0 yes | 181.427   | 157.386   | 205.467   | 295.563   | 264.745   | 326.381   |
| ENSG00000151468 | ENSG00000151468 | CCDC3           | 10:129386 | q1 | q2 | 0.49  | -7.112  | 0 | 0     | 0 yes | 0.0237562 | 0.0214209 | 0.0260915 | 0.0387679 | 0.0350284 | 0.0425075 |
| ENSG00000000419 | ENSG00000000419 | DPM1            | 20:495514 | q1 | q2 | 0.491 | -3.985  | 0 | 0.001 | yes   | 31.7254   | 27.0244   | 36.4264   | 51.8412   | 41.6314   | 62.0509   |
| ENSG00000115841 | ENSG00000115841 | FAM82A1         | 2:3815032 | q1 | q2 | 0.491 | -3.528  | 0 | 0.008 | yes   | 9.66154   | 7.75826   | 11.5648   | 15.7857   | 12.6822   | 18.8892   |
| ENSG00000140323 | ENSG00000140323 | DISP2           | 15:406504 | q1 | q2 | 0.491 | -3.652  | 0 | 0.005 | yes   | 2.47      | 1.97284   | 2.96717   | 4.03597   | 3.31632   | 4.75562   |
| ENSG00000173137 | ENSG00000173137 | ADCK5           | 8:1455967 | q1 | q2 | 0.491 | -6.605  | 0 | 0     | 0 yes | 34.7945   | 30.8998   | 38.6892   | 56.8369   | 51.2831   | 62.3908   |
| ENSG00000093100 | ENSG00000093100 | XXbac-B461K10.4 | 22:182704 | q1 | q2 | 0.496 | -3.952  | 0 | 0.002 | yes   | 13.3067   | 10.629    | 15.9843   | 21.8569   | 18.5717   | 25.1422   |
| ENSG00000197892 | ENSG00000197892 | KIF13B          | 8:2892479 | q1 | q2 | 0.499 | -4.376  | 0 | 0     | 0 yes | 15.5391   | 12.5685   | 18.5097   | 25.6035   | 22.4123   | 28.7947   |
| ENSG00000171497 | ENSG00000171497 | PPID            | 4:1595878 | q1 | q2 | 0.501 | -3.587  | 0 | 0.006 | yes   | 12.575    | 9.98888   | 15.1611   | 20.7627   | 16.8295   | 24.6958   |
| ENSG00000180398 | ENSG00000180398 | MCFD2           | 2:4712641 | q1 | q2 | 0.507 | -5.198  | 0 | 0     | 0 yes | 35.2825   | 29.6761   | 40.8889   | 58.5773   | 51.9514   | 65.2032   |
| ENSG00000189308 | ENSG00000189308 | LIN54           | 4:8373981 | q1 | q2 | 0.51  | -4.063  | 0 | 0.001 | yes   | 9.13667   | 7.41938   | 10.854    | 15.2163   | 12.6833   | 17.7492   |
| ENSG00000149273 | ENSG00000149273 | RPS3            | 11:751105 | q1 | q2 | 0.511 | -8.798  | 0 | 0     | 0 yes | 1049.06   | 963.965   | 1134.15   | 1748.81   | 1603.37   | 1894.25   |
| ENSG00000199916 | ENSG00000199916 | RMRP            | 9:3565775 | q1 | q2 | 0.511 | -4.073  | 0 | 0.001 | yes   | 207.086   | 168.097   | 246.074   | 345.303   | 287.943   | 402.664   |
| ENSG00000173163 | ENSG00000173163 | COMMD1          | 2:6209522 | q1 | q2 | 0.512 | -4.915  | 0 | 0     | 0 yes | 40.9777   | 34.4961   | 47.4593   | 68.3461   | 59.0973   | 77.5949   |
| ENSG00000243364 | ENSG00000243364 | EFNA4           | 1:1550362 | q1 | q2 | 0.514 | -5.065  | 0 | 0     | 0 yes | 18.3957   | 15.5349   | 21.2566   | 30.7593   | 26.7456   | 34.773    |
| ENSG00000173465 | ENSG00000173465 | SSSCA1          | 11:653379 | q1 | q2 | 0.517 | -6.078  | 0 | 0     | 0 yes | 62.9712   | 55.0993   | 70.843    | 105.554   | 93.3965   | 117.711   |
| ENSG00000100320 | ENSG00000100320 | RBFOX2          | 22:361347 | q1 | q2 | 0.518 | -3.942  | 0 | 0.002 | yes   | 98.8157   | 78.054    | 119.577   | 165.852   | 139.695   | 192.008   |
| ENSG00000169762 | ENSG00000169762 | TAPT1           | 4:1616212 | q1 | q2 | 0.518 | -4.504  | 0 | 0     | 0 yes | 34.1532   | 28.1035   | 40.2028   | 57.3292   | 48.9192   | 65.7391   |
| ENSG00000152942 | ENSG00000152942 | RAD17           | 5:6864681 | q1 | q2 | 0.519 | -4.477  | 0 | 0     | 0 yes | 11.4727   | 9.72114   | 13.2243   | 19.2768   | 15.9139   | 22.6398   |
| ENSG00000196141 | ENSG00000196141 | SPATS2L         | 2:2011706 | q1 | q2 | 0.52  | -6.16   | 0 | 0     | 0 yes | 62.1816   | 54.2242   | 70.1391   | 104.624   | 93.0882   | 116.16    |
| ENSG00000138400 | ENSG00000138400 | MDH1B           | 2:2076024 | q1 | q2 | 0.522 | -4.437  | 0 | 0     | 0 yes | 7.64561   | 6.28569   | 9.00553   | 12.8883   | 10.9014   | 14.8752   |
| ENSG00000229127 | ENSG00000229127 | AC007038.7      | 2:2108672 | q1 | q2 | 0.527 | -5.623  | 0 | 0     | 0 yes | 0.0300466 | 0.0260134 | 0.0340798 | 0.0509128 | 0.0442419 | 0.0575836 |
| ENSG00000113068 | ENSG00000113068 | PFDN1           | 5:1395542 | q1 | q2 | 0.531 | -3.942  | 0 | 0.002 | yes   | 31.0809   | 25.4195   | 36.7423   | 52.8525   | 42.3634   | 63.3417   |
| ENSG00000152503 | ENSG00000152503 | TRIM36          | 5:1144604 | q1 | q2 | 0.531 | -5.977  | 0 | 0     | 0 yes | 47.5393   | 42.4403   | 52.6382   | 80.8251   | 69.3857   | 92.2644   |
| ENSG00000171863 | ENSG00000171863 | RPS7            | 2:3616112 | q1 | q2 | 0.533 | -4.539  | 0 | 0     | 0 yes | 20.5953   | 16.6692   | 24.5213   | 35.0819   | 30.2808   | 39.883    |
| ENSG00000247315 | ENSG00000247315 | AL034548.2      | 20:277736 | q1 | q2 | 0.535 | -3.842  | 0 | 0.002 | yes   | 5.10382   | 4.03321   | 6.17444   | 8.71429   | 7.11842   | 10.3102   |
| ENSG00000173210 | ENSG00000173210 | ABLIM3          | 5:1485210 | q1 | q2 | 0.537 | -5.013  | 0 | 0     | 0 yes | 11.9254   | 10.2995   | 13.5512   | 20.3983   | 17.0291   | 23.7676   |
| ENSG00000181381 | ENSG00000181381 | DDX60L          | 4:1692778 | q1 | q2 | 0.542 | -3.95   | 0 | 0.002 | yes   | 8.18907   | 6.80969   | 9.56846   | 14.086    | 11.0307   | 17.1413   |
| ENSG00000197548 | ENSG00000197548 | ATG7            | 3:1131399 | q1 | q2 | 0.542 | -6.8    | 0 | 0     | 0 yes | 76.5103   | 67.5007   | 85.5199   | 131.577   | 117.431   | 145.722   |
| ENSG00000214549 | ENSG00000214549 | RP11-360G10.2   | 10:938083 | q1 | q2 | 0.544 | -4.856  | 0 | 0     | 0 yes | 0.184102  | 0.156108  | 0.212096  | 0.317096  | 0.264966  | 0.369227  |
| ENSG00000151445 | ENSG00000151445 | VIPAR           | 14:778930 | q1 | q2 | 0.547 | -6.275  | 0 | 0     | 0 yes | 30.4652   | 25.9908   | 34.9395   | 52.6323   | 47.696    | 57.5686   |
| ENSG00000198042 | ENSG00000198042 | MAK16           | 8:3322834 | q1 | q2 | 0.548 | -3.896  | 0 | 0.002 | yes   | 10.4381   | 8.22519   | 12.651    | 18.0543   | 14.7161   | 21.3926   |
| ENSG00000134490 | ENSG00000134490 | C18orf45        | 18:207145 | q1 | q2 | 0.558 | -4.919  | 0 | 0     | 0 yes | 10.4934   | 8.49636   | 12.4905   | 18.3343   | 16.0689   | 20.5997   |
| ENSG00000168887 | ENSG00000168887 | C2orf68         | 2:8582567 | q1 | q2 | 0.559 | -7.116  | 0 | 0     | 0 yes | 54.3149   | 47.9425   | 60.6873   | 94.9474   | 85.0464   | 104.848   |
| ENSG00000125148 | ENSG00000125148 | MT2A            | 16:566421 | q1 | q2 | 0.56  | -4.622  | 0 | 0     | 0 yes | 27.8804   | 22.7877   | 32.9731   | 48.8031   | 41.0378   | 56.5684   |
| ENSG00000160710 | ENSG00000160710 | ADAR            | 1:1545545 | q1 | q2 | 0.561 | -10.811 | 0 | 0     | 0 yes | 202.253   | 188.515   | 215.992   | 354.513   | 326.675   | 382.35    |
| ENSG00000213204 | ENSG00000213204 | C6orf165        | 6:8811770 | q1 | q2 | 0.561 | -5.185  | 0 | 0     | 0 yes | 8.95912   | 7.41371   | 10.5045   | 15.7049   | 13.6499   | 17.76     |
| ENSG00000115267 | ENSG00000115267 | IFIH1           | 2:1631235 | q1 | q2 | 0.565 | -4.638  | 0 | 0     | 0 yes | 25.8069   | 20.9724   | 30.6414   | 45.4255   | 38.3372   | 52.5139   |
| ENSG00000124802 | ENSG00000124802 | EEF1E1          | 6:7726331 | q1 | q2 | 0.566 | -3.807  | 0 | 0.003 | yes   | 17.9549   | 13.6585   | 22.2513   | 31.6363   | 26.0403   | 37.2323   |
| ENSG00000235092 | ENSG00000235092 | AC011747.7      | 2:8806765 | q1 | q2 | 0.567 | -3.843  | 0 | 0.002 | yes   | 21.4756   | 16.5959   | 26.3552   | 37.8493   | 30.7313   | 44.9673   |
| ENSG00000231357 | ENSG00000231357 | AC006028.11     | 7:2719155 | q1 | q2 | 0.568 | -3.708  | 0 | 0.004 | yes   | 38.2741   | 29.3974   | 47.1509   | 67.5158   | 54.0235   | 81.0082   |
| ENSG00000164543 | ENSG00000164543 | STK17A          | 7:4362235 | q1 | q2 | 0.573 | -3.852  | 0 | 0.002 | yes   | 5.32619   | 4.23804   | 6.41433   | 9.44333   | 7.40335   | 11.4833   |
| ENSG00000152465 | ENSG00000152465 | NMT2            | 10:151373 | q1 | q2 | 0.575 | -3.804  | 0 | 0.003 | yes   | 6.29915   | 4.87122   | 7.72709   | 11.1892   | 8.95494   | 13.4235   |
| ENSG00000166337 | ENSG00000166337 | TAF10           | 11:662487 | q1 | q2 | 0.576 | -7.341  | 0 | 0     | 0 yes | 133.459   | 117.665   | 149.253   | 237.448   | 212.965   | 261.932   |
| ENSG00000140993 | ENSG00000140993 | TIGD7           | 16:331379 | q1 | q2 | 0.579 | -4.963  | 0 | 0     | 0 yes | 7.41936   | 6.10247   | 8.73626   | 13.2323   | 11.2322   | 15.2323   |
| ENSG00000136108 | ENSG00000136108 | CKAP2           | 13:530294 | q1 | q2 | 0.581 | -3.712  | 0 | 0.004 | yes   | 24.1247   | 19.361    | 28.8884   | 43.1151   | 32.6538   | 53.5764   |
| ENSG00000164808 | ENSG00000164808 | KIAA0146        | 8:4817316 | q1 | q2 | 0.59  | -7.523  | 0 | 0     | 0 yes | 92.1696   | 81.7585   | 102.581   | 166.244   | 148.163   | 184.324   |
| ENSG00000171121 | ENSG00000171121 | KCNMB3          | 3:1788659 | q1 | q2 | 0.592 | -3.999  | 0 | 0.001 | yes   | 6.21588   | 4.71517   | 7.7166    | 11.24     | 9.31074   | 13.1694   |

|                 |                 |                 |           |    |    |       |        |   |           |           |           |            |           |           |           |
|-----------------|-----------------|-----------------|-----------|----|----|-------|--------|---|-----------|-----------|-----------|------------|-----------|-----------|-----------|
| ENSG00000242515 | ENSG00000242515 | UGT1A10         | 2:2345262 | q1 | q2 | 0.592 | -8.51  | 0 | 0 yes     | 0.0009914 | 0.0008966 | 0.00108626 | 0.0017928 | 0.0016114 | 0.0019741 |
| ENSG00000250264 | ENSG00000250264 | XXbac-BPG246D16 | 3:3278053 | q1 | q2 | 0.593 | -5.368 | 0 | 0 yes     | 8.75302   | 7.29237   | 10.2137    | 15.8414   | 13.5455   | 18.1374   |
| ENSG00000103056 | ENSG00000103056 | SMPD3           | 16:683922 | q1 | q2 | 0.595 | -4.048 | 0 | 0.001 yes | 1.64115   | 1.27475   | 2.00755    | 2.97442   | 2.40636   | 3.54247   |
| ENSG00000112695 | ENSG00000112695 | COX7A2          | 6:7594739 | q1 | q2 | 0.598 | -5.747 | 0 | 0 yes     | 148.55    | 131.156   | 165.944    | 270.202   | 223.692   | 316.713   |
| ENSG00000127423 | ENSG00000127423 | C1orf135        | 1:2612666 | q1 | q2 | 0.606 | -4.164 | 0 | 0.001 yes | 5.52374   | 4.29344   | 6.75403    | 10.1205   | 8.22739   | 12.0137   |
| ENSG00000126777 | ENSG00000126777 | KTN1            | 14:559659 | q1 | q2 | 0.608 | -9.71  | 0 | 0 yes     | 142.524   | 129.532   | 155.516    | 261.667   | 239.234   | 284.099   |
| ENSG00000086189 | ENSG00000086189 | DIMT1L          | 5:6160198 | q1 | q2 | 0.61  | -6.375 | 0 | 0 yes     | 25.4009   | 21.7035   | 29.0984    | 46.7367   | 40.9366   | 52.5368   |
| ENSG00000227323 | ENSG00000227323 | RP11-443A13.3   | 10:786373 | q1 | q2 | 0.61  | -6.101 | 0 | 0 yes     | 0.0424528 | 0.0365082 | 0.0483974  | 0.0781508 | 0.0669864 | 0.0893152 |
| ENSG00000147439 | ENSG00000147439 | BIN3            | 8:2246214 | q1 | q2 | 0.611 | -4.199 | 0 | 0.001 yes | 21.3315   | 16.2689   | 26.3941    | 39.3035   | 32.6791   | 45.928    |
| ENSG00000079337 | ENSG00000079337 | RAPGEF3         | 12:480998 | q1 | q2 | 0.614 | -5.823 | 0 | 0 yes     | 14.5881   | 11.9521   | 17.224     | 26.9599   | 24.0257   | 29.8941   |
| ENSG00000257076 | ENSG00000257076 | RP11-546D6.2    | 12:123636 | q1 | q2 | 0.614 | -4.313 | 0 | 0 yes     | 20.6937   | 16.0245   | 25.3629    | 38.2287   | 31.5976   | 44.8598   |
| ENSG00000165819 | ENSG00000165819 | METTL3          | 14:219271 | q1 | q2 | 0.62  | -5.235 | 0 | 0 yes     | 16.0878   | 13.0144   | 19.1612    | 29.9044   | 25.7173   | 34.0915   |
| ENSG00000205413 | ENSG00000205413 | SAMD9           | 7:9272882 | q1 | q2 | 0.625 | -5.501 | 0 | 0 yes     | 7.73459   | 6.19169   | 9.27749    | 14.4474   | 12.8775   | 16.0174   |
| ENSG00000115268 | ENSG00000115268 | RPS15           | 19:143836 | q1 | q2 | 0.629 | -7.479 | 0 | 0 yes     | 188.464   | 164.762   | 212.166    | 353.523   | 314.027   | 393.02    |
| ENSG00000204642 | ENSG00000204642 | HLA-F           | 6:2969055 | q1 | q2 | 0.631 | -6.655 | 0 | 0 yes     | 38.6678   | 33.1913   | 44.1443    | 72.6925   | 63.5193   | 81.8657   |
| ENSG00000243916 | ENSG00000243916 | RP11-6K23.1     | 12:152607 | q1 | q2 | 0.632 | -6.769 | 0 | 0 yes     | 0.0402162 | 0.0350565 | 0.045376   | 0.0756816 | 0.0654064 | 0.0859568 |
| ENSG00000251403 | ENSG00000251403 | RP11-298J23.6   | 6:4176210 | q1 | q2 | 0.632 | -3.599 | 0 | 0.006 yes | 0.123573  | 0.0938204 | 0.153326   | 0.232588  | 0.173028  | 0.292148  |
| ENSG00000138709 | ENSG00000138709 | LARP1B          | 4:1289824 | q1 | q2 | 0.634 | -4.345 | 0 | 0 yes     | 5.53153   | 4.43143   | 6.63162    | 10.4233   | 8.19994   | 12.6466   |
| ENSG00000250317 | ENSG00000250317 | C4orf52         | 4:2574905 | q1 | q2 | 0.636 | -4.476 | 0 | 0 yes     | 13.9877   | 10.8877   | 17.0877    | 26.4166   | 21.7222   | 31.111    |
| ENSG00000076554 | ENSG00000076554 | TPD52           | 8:8083095 | q1 | q2 | 0.638 | -9.351 | 0 | 0 yes     | 91.1268   | 82.0318   | 100.222    | 172.395   | 156.377   | 188.413   |
| ENSG00000143158 | ENSG00000143158 | BRP44           | 1:1678859 | q1 | q2 | 0.64  | -5.501 | 0 | 0 yes     | 23.189    | 19.0106   | 27.3674    | 43.9581   | 37.4962   | 50.4199   |
| ENSG00000116213 | ENSG00000116213 | WRAP73          | 1:3547330 | q1 | q2 | 0.641 | -5.006 | 0 | 0 yes     | 14.1196   | 11.4227   | 16.8165    | 26.803    | 22.2319   | 31.374    |
| ENSG00000258959 | ENSG00000258959 | RP11-1017G21.4  | 14:102430 | q1 | q2 | 0.646 | -3.505 | 0 | 0.008 yes | 18.4854   | 13.1331   | 23.8377    | 35.2517   | 27.2255   | 43.2779   |
| ENSG00000148444 | ENSG00000148444 | COMMD3          | 10:226049 | q1 | q2 | 0.647 | -4.798 | 0 | 0 yes     | 55.6977   | 42.2747   | 69.1207    | 106.407   | 93.4888   | 119.326   |
| ENSG00000137965 | ENSG00000137965 | IFI44           | 1:7911548 | q1 | q2 | 0.654 | -3.799 | 0 | 0.003 yes | 19.1637   | 14.9745   | 23.3529    | 36.8627   | 27.0531   | 46.6724   |
| ENSG00000224281 | ENSG00000224281 | RP3-404F18.2    | X:1185999 | q1 | q2 | 0.654 | -4.401 | 0 | 0 yes     | 2.96966   | 2.30362   | 3.6357     | 5.71      | 4.59719   | 6.82281   |
| ENSG00000125691 | ENSG00000125691 | RPL23           | 17:370041 | q1 | q2 | 0.665 | -6.395 | 0 | 0 yes     | 120.111   | 104.353   | 135.869    | 233.66    | 195.906   | 271.414   |
| ENSG00000122482 | ENSG00000122482 | ZNF644          | 1:9138085 | q1 | q2 | 0.669 | -3.59  | 0 | 0.006 yes | 15.9959   | 10.5787   | 21.4132    | 31.2149   | 26.3774   | 36.0525   |
| ENSG00000163870 | ENSG00000163870 | TPRA1           | 3:1272919 | q1 | q2 | 0.669 | -8.717 | 0 | 0 yes     | 28.7864   | 25.1921   | 32.3808    | 56.1832   | 51.1736   | 61.1928   |
| ENSG00000159214 | ENSG00000159214 | CCDC24          | 1:4445703 | q1 | q2 | 0.678 | -6.183 | 0 | 0 yes     | 22.9872   | 18.7158   | 27.2587    | 45.2686   | 40.0058   | 50.5314   |
| ENSG00000102572 | ENSG00000102572 | STK24           | 13:991024 | q1 | q2 | 0.68  | -6.193 | 0 | 0 yes     | 22.0067   | 19.2473   | 24.7662    | 43.4462   | 35.6112   | 51.2812   |
| ENSG00000248341 | ENSG00000248341 | AC115115.2      | 2:1130331 | q1 | q2 | 0.682 | -7.487 | 0 | 0 yes     | 0.164758  | 0.143876  | 0.18564    | 0.325995  | 0.283282  | 0.368709  |
| ENSG00000109689 | ENSG00000109689 | STIM2           | 4:2685929 | q1 | q2 | 0.686 | -6.491 | 0 | 0 yes     | 7.11159   | 6.1931    | 8.03008    | 14.1282   | 11.762    | 16.4944   |
| ENSG00000149564 | ENSG00000149564 | ESAM            | 11:124609 | q1 | q2 | 0.687 | -5.068 | 0 | 0 yes     | 5.19324   | 4.08903   | 6.29745    | 10.3223   | 8.58596   | 12.0586   |
| ENSG00000137821 | ENSG00000137821 | LRRC49          | 15:711238 | q1 | q2 | 0.688 | -5.3   | 0 | 0 yes     | 3.91987   | 3.12335   | 4.71639    | 7.79652   | 6.53823   | 9.0548    |
| ENSG00000168890 | ENSG00000168890 | TMEM150A        | 2:8582567 | q1 | q2 | 0.691 | -6.869 | 0 | 0 yes     | 29.1952   | 24.6603   | 33.7302    | 58.2904   | 50.824    | 65.7569   |
| ENSG00000218739 | ENSG00000218739 | AC007390.5      | 2:3739496 | q1 | q2 | 0.692 | -3.757 | 0 | 0.003 yes | 4.36053   | 3.09094   | 5.63013    | 8.70675   | 6.74622   | 10.6673   |
| ENSG00000095794 | ENSG00000095794 | CREM            | 10:353869 | q1 | q2 | 0.694 | -5.737 | 0 | 0 yes     | 29.9617   | 24.6107   | 35.3127    | 59.9975   | 50.1915   | 69.8035   |
| ENSG00000145730 | ENSG00000145730 | PAM             | 5:1020896 | q1 | q2 | 0.695 | -4.803 | 0 | 0 yes     | 22.4846   | 16.8859   | 28.0833    | 45.0437   | 38.4052   | 51.6822   |
| ENSG00000257534 | ENSG00000257534 | RP11-834C11.10  | 12:545558 | q1 | q2 | 0.702 | -8.706 | 0 | 0 yes     | 0.0820847 | 0.0729501 | 0.0912193  | 0.165593  | 0.146278  | 0.184908  |
| ENSG00000153044 | ENSG00000153044 | CENPH           | 5:6848537 | q1 | q2 | 0.707 | -3.488 | 0 | 0.009 yes | 17.0121   | 12.3687   | 21.6556    | 34.4821   | 24.1621   | 44.8021   |
| ENSG00000184381 | ENSG00000184381 | PLA2G6          | 22:385075 | q1 | q2 | 0.709 | -4.155 | 0 | 0.001 yes | 24.8214   | 17.2961   | 32.3467    | 50.4202   | 42.54     | 58.3003   |
| ENSG00000116750 | ENSG00000116750 | UCHL5           | 1:1929848 | q1 | q2 | 0.712 | -6.666 | 0 | 0 yes     | 16.9344   | 13.9135   | 19.9554    | 34.512    | 30.4575   | 38.5665   |
| ENSG00000089127 | ENSG00000089127 | OAS1            | 12:113344 | q1 | q2 | 0.713 | -8.461 | 0 | 0 yes     | 150.99    | 131.98    | 170        | 308.168   | 273.593   | 342.742   |
| ENSG00000151150 | ENSG00000151150 | ANK3            | 10:617881 | q1 | q2 | 0.718 | -5.86  | 0 | 0 yes     | 33.9704   | 27.581    | 40.3598    | 69.6773   | 58.7171   | 80.6374   |
| ENSG00000170191 | ENSG00000170191 | NANP            | 20:255935 | q1 | q2 | 0.725 | -4.574 | 0 | 0 yes     | 1.71362   | 1.29319   | 2.13404    | 3.53806   | 2.82774   | 4.24839   |
| ENSG00000198056 | ENSG00000198056 | PRIM1           | 12:571062 | q1 | q2 | 0.725 | -4.225 | 0 | 0.001 yes | 15.0689   | 11.0433   | 19.0944    | 31.1083   | 24.4082   | 37.8084   |
| ENSG00000129472 | ENSG00000129472 | RAB2B           | 14:219271 | q1 | q2 | 0.729 | -3.881 | 0 | 0.002 yes | 8.99395   | 6.30445   | 11.6834    | 18.649    | 14.4052   | 22.8927   |
| ENSG00000184508 | ENSG00000184508 | HDDC3           | 15:914717 | q1 | q2 | 0.732 | -6.929 | 0 | 0 yes     | 21.1956   | 17.6736   | 24.7176    | 44.052    | 38.3123   | 49.7917   |
| ENSG00000108094 | ENSG00000108094 | CUL2            | 10:352974 | q1 | q2 | 0.735 | -4.698 | 0 | 0 yes     | 9.93479   | 8.56752   | 11.302     | 20.7185   | 14.896    | 26.5411   |

|                 |                 |               |           |    |    |       |         |   |       |       |           |           |           |          |           |          |
|-----------------|-----------------|---------------|-----------|----|----|-------|---------|---|-------|-------|-----------|-----------|-----------|----------|-----------|----------|
| ENSG00000213397 | ENSG00000213397 | HAUS7         | X:1527101 | q1 | q2 | 0.737 | -4.379  | 0 | 0     | 0 yes | 37.1909   | 30.6633   | 43.7185   | 77.7378  | 55.3954   | 100.08   |
| ENSG00000258168 | ENSG00000258168 | RP11-588H23.3 | 12:708618 | q1 | q2 | 0.746 | -7.982  | 0 | 0     | 0 yes | 0.113343  | 0.0992027 | 0.127484  | 0.238872 | 0.205666  | 0.272078 |
| ENSG00000127720 | ENSG00000127720 | C12orf26      | 12:826174 | q1 | q2 | 0.747 | -4.986  | 0 | 0     | 0 yes | 16.6681   | 12.657    | 20.6793   | 35.1879  | 28.9021   | 41.4737  |
| ENSG00000028116 | ENSG00000028116 | VRK2          | 2:5813478 | q1 | q2 | 0.749 | -4.733  | 0 | 0     | 0 yes | 6.68694   | 4.95365   | 8.42023   | 14.1446  | 11.5732   | 16.7159  |
| ENSG00000012822 | ENSG00000012822 | CALCOCO1      | 12:541049 | q1 | q2 | 0.751 | -5.094  | 0 | 0     | 0 yes | 29.3097   | 21.5591   | 37.0604   | 62.0958  | 54.0131   | 70.1784  |
| ENSG00000244663 | ENSG00000244663 | AC007599.1    | 16:474952 | q1 | q2 | 0.753 | -9.242  | 0 | 0     | 0 yes | 145.72    | 127.806   | 163.634   | 309.433  | 276.33    | 342.537  |
| ENSG00000129696 | ENSG00000129696 | C8orf41       | 8:3322834 | q1 | q2 | 0.754 | -5.208  | 0 | 0     | 0 yes | 13.328    | 10.2652   | 16.3908   | 28.3297  | 23.3381   | 33.3214  |
| ENSG00000138768 | ENSG00000138768 | USO1          | 4:7664976 | q1 | q2 | 0.761 | -4.765  | 0 | 0     | 0 yes | 19.8764   | 17.2183   | 22.5344   | 42.5258  | 30.1985   | 54.8532  |
| ENSG00000167081 | ENSG00000167081 | PBX3          | 9:1285085 | q1 | q2 | 0.761 | -7.233  | 0 | 0     | 0 yes | 36.3758   | 30.4505   | 42.301    | 77.8935  | 67.5009   | 88.286   |
| ENSG00000129515 | ENSG00000129515 | SNX6          | 14:350259 | q1 | q2 | 0.763 | -6.058  | 0 | 0     | 0 yes | 15.8629   | 13.2198   | 18.5059   | 34.0256  | 27.5955   | 40.4558  |
| ENSG00000178878 | ENSG00000178878 | APOLD1        | 12:128788 | q1 | q2 | 0.764 | -6.811  | 0 | 0     | 0 yes | 2.95584   | 2.43677   | 3.4749    | 6.34384  | 5.45891   | 7.22876  |
| ENSG00000107771 | ENSG00000107771 | FAM190B       | 10:860883 | q1 | q2 | 0.766 | -4.42   | 0 | 0     | 0 yes | 20.3912   | 14.0758   | 26.7066   | 43.8547  | 37.0381   | 50.6713  |
| ENSG00000255729 | ENSG00000255729 | AC005618.1    | 5:1406980 | q1 | q2 | 0.766 | -4.058  | 0 | 0.001 | yes   | 11.675    | 8.15604   | 15.194    | 25.1255  | 19.4042   | 30.8467  |
| ENSG00000164163 | ENSG00000164163 | ABCE1         | 4:1458882 | q1 | q2 | 0.772 | -4.256  | 0 | 0     | 0 yes | 7.13842   | 5.09101   | 9.18583   | 15.4545  | 12.0159   | 18.8931  |
| ENSG00000147586 | ENSG00000147586 | MRPS28        | 8:8083095 | q1 | q2 | 0.773 | -4.462  | 0 | 0     | 0 yes | 19.7044   | 14.1797   | 25.2291   | 42.6965  | 33.9985   | 51.3945  |
| ENSG00000052841 | ENSG00000052841 | TTC17         | 11:433335 | q1 | q2 | 0.778 | -6.027  | 0 | 0     | 0 yes | 19.1489   | 15.4218   | 22.8759   | 41.6886  | 34.6181   | 48.7591  |
| ENSG00000159199 | ENSG00000159199 | ATP5G1        | 17:469522 | q1 | q2 | 0.778 | -4.205  | 0 | 0.001 | yes   | 17.6581   | 12.2147   | 23.1015   | 38.4314  | 30.5775   | 46.2852  |
| ENSG00000111845 | ENSG00000111845 | PAK1IP1       | 6:1067165 | q1 | q2 | 0.789 | -4.079  | 0 | 0.001 | yes   | 2.47288   | 1.7074    | 3.23836   | 5.44243  | 4.18052   | 6.70435  |
| ENSG00000162174 | ENSG00000162174 | ASRGL1        | 11:621043 | q1 | q2 | 0.791 | -5.534  | 0 | 0     | 0 yes | 17.3332   | 13.5643   | 21.1021   | 38.2451  | 31.1393   | 45.3509  |
| ENSG00000134326 | ENSG00000134326 | CMPK2         | 2:6980700 | q1 | q2 | 0.794 | -8.621  | 0 | 0     | 0 yes | 44.4982   | 37.9942   | 51.0022   | 98.4091  | 87.3887   | 109.43   |
| ENSG00000174483 | ENSG00000174483 | BBS1          | 11:662342 | q1 | q2 | 0.794 | -5.126  | 0 | 0     | 0 yes | 11.1253   | 8.23966   | 14.011    | 24.6118  | 20.442    | 28.7816  |
| ENSG00000110536 | ENSG00000110536 | PTPMT1        | 11:474874 | q1 | q2 | 0.795 | -8.917  | 0 | 0     | 0 yes | 52.6761   | 45.4708   | 59.8813   | 116.688  | 103.326   | 130.049  |
| ENSG00000071794 | ENSG00000071794 | HLTF          | 3:1487479 | q1 | q2 | 0.798 | -6.104  | 0 | 0     | 0 yes | 25.0488   | 20.9836   | 29.114    | 55.6575  | 44.2397   | 67.0754  |
| ENSG00000255857 | ENSG00000255857 | RP1-278C19.3  | 12:120639 | q1 | q2 | 0.8   | -6.357  | 0 | 0     | 0 yes | 14.9677   | 12.0054   | 17.9301   | 33.2979  | 28.1264   | 38.4693  |
| ENSG00000144554 | ENSG00000144554 | FANCD2        | 3:1006809 | q1 | q2 | 0.803 | -5.127  | 0 | 0     | 0 yes | 17.051    | 12.7758   | 21.3262   | 38.0756  | 30.9168   | 45.2344  |
| ENSG00000255909 | ENSG00000255909 | RP11-841C19.3 | 12:195569 | q1 | q2 | 0.806 | -11.834 | 0 | 0     | 0 yes | 0.249049  | 0.227555  | 0.270544  | 0.557656 | 0.498874  | 0.616438 |
| ENSG00000107201 | ENSG00000107201 | DDX58         | 9:3245529 | q1 | q2 | 0.807 | -5.785  | 0 | 0     | 0 yes | 18.871    | 15.831    | 21.911    | 42.2729  | 32.6532   | 51.8925  |
| ENSG00000120306 | ENSG00000120306 | C5orf32       | 5:1395542 | q1 | q2 | 0.807 | -4.816  | 0 | 0     | 0 yes | 11.6899   | 8.50539   | 14.8745   | 26.1901  | 21.0834   | 31.2968  |
| ENSG00000100142 | ENSG00000100142 | POLR2F        | 22:383395 | q1 | q2 | 0.809 | -7.567  | 0 | 0     | 0 yes | 69.0902   | 59.2197   | 78.9607   | 155.174  | 130.478   | 179.869  |
| ENSG00000012048 | ENSG00000012048 | BRCA1         | 17:411963 | q1 | q2 | 0.81  | -6.89   | 0 | 0     | 0 yes | 7.80394   | 6.68617   | 8.92171   | 17.5422  | 14.2713   | 20.8131  |
| ENSG00000135114 | ENSG00000135114 | OASL          | 12:121458 | q1 | q2 | 0.81  | -6.322  | 0 | 0     | 0 yes | 12.9576   | 10.2448   | 15.6704   | 29.1234  | 24.8225   | 33.4242  |
| ENSG00000157734 | ENSG00000157734 | SNX22         | 15:644439 | q1 | q2 | 0.812 | -5.904  | 0 | 0     | 0 yes | 2.27315   | 1.77257   | 2.77373   | 5.12015  | 4.27609   | 5.9642   |
| ENSG00000116791 | ENSG00000116791 | CRYZ          | 1:7501808 | q1 | q2 | 0.822 | -7.474  | 0 | 0     | 0 yes | 17.0372   | 13.8403   | 20.2342   | 38.7693  | 34.3158   | 43.2228  |
| ENSG00000160957 | ENSG00000160957 | RECQL4        | 8:1457366 | q1 | q2 | 0.825 | -12.962 | 0 | 0     | 0 yes | 106.007   | 95.9861   | 116.027   | 242.005  | 221.349   | 262.661  |
| ENSG00000166529 | ENSG00000166529 | ZSCAN21       | 7:9964738 | q1 | q2 | 0.826 | -6.879  | 0 | 0     | 0 yes | 9.44368   | 7.52955   | 11.3578   | 21.5793  | 18.7956   | 24.3629  |
| ENSG00000167553 | ENSG00000167553 | TUBA1C        | 12:495785 | q1 | q2 | 0.827 | -14.373 | 0 | 0     | 0 yes | 111.69    | 102.125   | 121.255   | 255.306  | 235.694   | 274.917  |
| ENSG00000112096 | ENSG00000112096 | SOD2          | 6:1601000 | q1 | q2 | 0.83  | -11.401 | 0 | 0     | 0 yes | 71.6372   | 63.8029   | 79.4714   | 164.366  | 148.546   | 180.186  |
| ENSG00000100934 | ENSG00000100934 | SEC23A        | 14:395011 | q1 | q2 | 0.831 | -9.035  | 0 | 0     | 0 yes | 71.9846   | 61.0015   | 82.9678   | 165.215  | 148.249   | 182.18   |
| ENSG00000129158 | ENSG00000129158 | SERGEF        | 11:178095 | q1 | q2 | 0.831 | -6.276  | 0 | 0     | 0 yes | 37.7388   | 31.2306   | 44.2471   | 86.6295  | 69.2207   | 104.038  |
| ENSG00000215217 | ENSG00000215217 | C5orf49       | 5:7830490 | q1 | q2 | 0.834 | -7.681  | 0 | 0     | 0 yes | 0.0500651 | 0.0427394 | 0.0573908 | 0.11522  | 0.0967503 | 0.133689 |
| ENSG00000228253 | ENSG00000228253 | J01415.25     | MT:8365-9 | q1 | q2 | 0.836 | -7.32   | 0 | 0     | 0 yes | 536.127   | 440.886   | 631.368   | 1236.72  | 1059.24   | 1414.2   |
| ENSG00000138111 | ENSG00000138111 | TMEM180       | 10:104221 | q1 | q2 | 0.839 | -3.623  | 0 | 0.005 | yes   | 2.03722   | 1.27054   | 2.80391   | 4.71273  | 3.44226   | 5.9832   |
| ENSG00000167996 | ENSG00000167996 | FTH1          | 11:617172 | q1 | q2 | 0.845 | -13.411 | 0 | 0     | 0 yes | 247.937   | 221.381   | 274.493   | 577.1    | 538.81    | 615.391  |
| ENSG00000164465 | ENSG00000164465 | DCBLD1        | 6:1176094 | q1 | q2 | 0.847 | -4.762  | 0 | 0     | 0 yes | 10.9167   | 7.95201   | 13.8813   | 25.4522  | 19.6111   | 31.2934  |
| ENSG00000065328 | ENSG00000065328 | MCM10         | 10:132035 | q1 | q2 | 0.848 | -5.489  | 0 | 0     | 0 yes | 6.9251    | 5.75661   | 8.09359   | 16.1653  | 11.9827   | 20.3479  |
| ENSG00000178623 | ENSG00000178623 | GPR35         | 2:2415261 | q1 | q2 | 0.852 | -3.912  | 0 | 0.002 | yes   | 2.14812   | 1.36561   | 2.93063   | 5.03663  | 3.83331   | 6.23995  |
| ENSG00000187109 | ENSG00000187109 | NAP1L1        | 12:764386 | q1 | q2 | 0.867 | -5.268  | 0 | 0     | 0 yes | 32.0684   | 25.5616   | 38.5752   | 76.2997  | 56.5323   | 96.0671  |
| ENSG00000258974 | ENSG00000258974 | AC002086.1    | X:1193846 | q1 | q2 | 0.872 | -4.831  | 0 | 0     | 0 yes | 2.0961    | 1.48766   | 2.70453   | 5.01475  | 3.93745   | 6.09206  |
| ENSG00000157985 | ENSG00000157985 | AGAP1         | 2:2364027 | q1 | q2 | 0.887 | -9.926  | 0 | 0     | 0 yes | 25.1248   | 21.8658   | 28.3838   | 61.0236  | 53.5139   | 68.5334  |
| ENSG00000119640 | ENSG00000119640 | ACYP1         | 14:755199 | q1 | q2 | 0.894 | -4.148  | 0 | 0.001 | yes   | 7.65149   | 4.97151   | 10.3315   | 18.7146  | 14.0048   | 23.4244  |

|                 |                 |               |           |    |    |       |         |   |       |     |           |           |            |           |           |           |
|-----------------|-----------------|---------------|-----------|----|----|-------|---------|---|-------|-----|-----------|-----------|------------|-----------|-----------|-----------|
| ENSG00000155636 | ENSG00000155636 | RBM45         | 2:1789771 | q1 | q2 | 0.894 | -3.734  | 0 | 0.004 | yes | 8.99241   | 5.15768   | 12.8271    | 21.9956   | 17.1909   | 26.8003   |
| ENSG00000121753 | ENSG00000121753 | BAI2          | 1:3219271 | q1 | q2 | 0.9   | -7.237  | 0 | 0     | yes | 11.0448   | 8.71151   | 13.378     | 27.1707   | 23.6007   | 30.7407   |
| ENSG00000256566 | ENSG00000256566 | RP4-734P14.4  | 20:244227 | q1 | q2 | 0.904 | -3.607  | 0 | 0.006 | yes | 3.51235   | 2.04891   | 4.97579    | 8.67496   | 6.25525   | 11.0947   |
| ENSG00000166548 | ENSG00000166548 | TK2           | 16:665419 | q1 | q2 | 0.905 | -4.166  | 0 | 0.001 | yes | 2.32987   | 1.83512   | 2.82461    | 5.7611    | 3.57616   | 7.94605   |
| ENSG00000126803 | ENSG00000126803 | HSPA2         | 14:648547 | q1 | q2 | 0.906 | -5.879  | 0 | 0     | yes | 12.9913   | 9.5313    | 16.4514    | 32.1379   | 27.1564   | 37.1193   |
| ENSG00000185201 | ENSG00000185201 | IFITM2        | 11:307630 | q1 | q2 | 0.906 | -9.56   | 0 | 0     | yes | 59.2737   | 50.0212   | 68.5262    | 146.696   | 130.915   | 162.476   |
| ENSG00000175066 | ENSG00000175066 | GK5           | 3:1418824 | q1 | q2 | 0.917 | -4.093  | 0 | 0.001 | yes | 7.63439   | 5.1189    | 10.1499    | 19.0928   | 13.3007   | 24.8849   |
| ENSG00000157851 | ENSG00000157851 | DPYSL5        | 2:2707061 | q1 | q2 | 0.919 | -6.757  | 0 | 0     | yes | 16.0265   | 12.4938   | 19.5592    | 40.1775   | 33.7714   | 46.5836   |
| ENSG00000173457 | ENSG00000173457 | PPP1R14B      | 11:640119 | q1 | q2 | 0.93  | -3.966  | 0 | 0.002 | yes | 5.21119   | 3.1778    | 7.24459    | 13.2123   | 9.77079   | 16.6537   |
| ENSG00000169991 | ENSG00000169991 | IFFO2         | 1:1916609 | q1 | q2 | 0.931 | -5.454  | 0 | 0     | yes | 5.94164   | 4.1593    | 7.72399    | 15.0799   | 12.6184   | 17.5414   |
| ENSG00000213689 | ENSG00000213689 | TREX1         | 3:4848811 | q1 | q2 | 0.932 | -6.705  | 0 | 0     | yes | 7.89936   | 5.92255   | 9.87617    | 20.07     | 17.6339   | 22.5061   |
| ENSG00000198417 | ENSG00000198417 | MT1F          | 16:566918 | q1 | q2 | 0.936 | -3.918  | 0 | 0.002 | yes | 16.9963   | 10.768    | 23.2245    | 43.3171   | 30.0524   | 56.5818   |
| ENSG00000204438 | ENSG00000204438 | GPANK1        | 6:3162900 | q1 | q2 | 0.939 | -9.624  | 0 | 0     | yes | 18.5908   | 15.4874   | 21.6943    | 47.5673   | 42.7506   | 52.3839   |
| ENSG00000183531 | ENSG00000183531 | Z98256.1      | 22:329085 | q1 | q2 | 0.94  | -3.869  | 0 | 0.002 | yes | 10.7821   | 6.40425   | 15.1599    | 27.6033   | 20.2337   | 34.9729   |
| ENSG00000214283 | ENSG00000214283 | RP11-85F14.1  | 3:1365810 | q1 | q2 | 0.943 | -9.206  | 0 | 0     | yes | 0.0178308 | 0.015334  | 0.0203276  | 0.0457738 | 0.0389312 | 0.0526164 |
| ENSG00000135476 | ENSG00000135476 | ESPL1         | 12:536620 | q1 | q2 | 0.948 | -9.375  | 0 | 0     | yes | 20.5529   | 17.8429   | 23.2629    | 53.0308   | 44.9009   | 61.1607   |
| ENSG00000138385 | ENSG00000138385 | SSB           | 2:1706484 | q1 | q2 | 0.955 | -7.915  | 0 | 0     | yes | 21.5039   | 17.2863   | 25.7216    | 55.8726   | 48.0225   | 63.7227   |
| ENSG00000091039 | ENSG00000091039 | OSBPL8        | 12:767455 | q1 | q2 | 0.964 | -6.565  | 0 | 0     | yes | 6.28457   | 5.46176   | 7.10738    | 16.4812   | 12.1477   | 20.8148   |
| ENSG00000185745 | ENSG00000185745 | IFIT1         | 10:909733 | q1 | q2 | 0.964 | -9.973  | 0 | 0     | yes | 17.7034   | 15.0296   | 20.3771    | 46.419    | 40.8172   | 52.0208   |
| ENSG00000107371 | ENSG00000107371 | EXOSC3        | 9:3751088 | q1 | q2 | 0.965 | -5.073  | 0 | 0     | yes | 21.0443   | 16.8946   | 25.194     | 55.2101   | 37.2596   | 73.1607   |
| ENSG00000204314 | ENSG00000204314 | PRRT1         | 6:3211613 | q1 | q2 | 0.97  | -10.08  | 0 | 0     | yes | 32.8292   | 27.8734   | 37.785     | 86.5642   | 76.2403   | 96.8881   |
| ENSG00000224189 | ENSG00000224189 | AC009336.23   | 2:1769863 | q1 | q2 | 0.986 | -5.438  | 0 | 0     | yes | 9.79845   | 6.88016   | 12.7167    | 26.267    | 20.8303   | 31.7037   |
| ENSG00000251314 | ENSG00000251314 | CTD-2337A12.1 | 5:9522080 | q1 | q2 | 0.988 | -25.541 | 0 | 0     | yes | 0.0481994 | 0.0455988 | 0.0508     | 0.129486  | 0.122303  | 0.136668  |
| ENSG00000114473 | ENSG00000114473 | IQCG          | 3:1976159 | q1 | q2 | 0.993 | -4.314  | 0 | 0     | yes | 4.91656   | 2.98014   | 6.85298    | 13.2773   | 10.1067   | 16.4479   |
| ENSG00000054267 | ENSG00000054267 | ARID4B        | 1:2352944 | q1 | q2 | 0.994 | -7.11   | 0 | 0     | yes | 12.9326   | 11.5959   | 14.2693    | 34.94     | 25.8637   | 44.0163   |
| ENSG00000134321 | ENSG00000134321 | RSAD2         | 2:6980700 | q1 | q2 | 1.002 | -8.312  | 0 | 0     | yes | 16.9812   | 13.5275   | 20.4348    | 46.2669   | 40.2688   | 52.265    |
| ENSG00000119917 | ENSG00000119917 | IFIT3         | 10:909733 | q1 | q2 | 1.005 | -9.031  | 0 | 0     | yes | 6.42996   | 5.27673   | 7.5832     | 17.5704   | 15.253    | 19.8878   |
| ENSG00000136143 | ENSG00000136143 | SUCLA2        | 13:485106 | q1 | q2 | 1.008 | -5.458  | 0 | 0     | yes | 7.01922   | 5.03448   | 9.00397    | 19.2411   | 14.6647   | 23.8175   |
| ENSG00000114544 | ENSG00000114544 | SLC41A3       | 3:1257251 | q1 | q2 | 1.01  | -10.551 | 0 | 0     | yes | 39.997    | 34.8023   | 45.1916    | 109.774   | 94.3429   | 125.205   |
| ENSG00000223725 | ENSG00000223725 | AC007879.5    | 2:2081043 | q1 | q2 | 1.014 | -17.121 | 0 | 0     | yes | 0.0739635 | 0.0677067 | 0.0802202  | 0.203789  | 0.186909  | 0.22067   |
| ENSG00000083097 | ENSG00000083097 | DOPEY1        | 6:8377738 | q1 | q2 | 1.027 | -5.484  | 0 | 0     | yes | 2.50174   | 1.61112   | 3.39237    | 6.9837    | 6.17474   | 7.79266   |
| ENSG00000225920 | ENSG00000225920 | RIMKLBP2      | 1:2192599 | q1 | q2 | 1.032 | -6.688  | 0 | 0     | yes | 0.0679035 | 0.0518985 | 0.0839085  | 0.190506  | 0.152594  | 0.228418  |
| ENSG00000119509 | ENSG00000119509 | INVS          | 9:1028615 | q1 | q2 | 1.036 | -5.164  | 0 | 0     | yes | 9.36207   | 5.9684    | 12.7557    | 26.37     | 21.8434   | 30.8966   |
| ENSG00000202394 | ENSG00000202394 | SNORD47       | 1:1738312 | q1 | q2 | 1.038 | -9.466  | 0 | 0     | yes | 29.417    | 24.7802   | 34.0537    | 83.0666   | 70.3991   | 95.7342   |
| ENSG00000143353 | ENSG00000143353 | LYPLAL1       | 1:2192599 | q1 | q2 | 1.04  | -5.328  | 0 | 0     | yes | 5.35593   | 3.79886   | 6.913      | 15.1583   | 11.2063   | 19.1104   |
| ENSG00000158092 | ENSG00000158092 | NCK1          | 3:1365810 | q1 | q2 | 1.04  | -4.03   | 0 | 0.001 | yes | 4.37678   | 2.28706   | 6.46651    | 12.3826   | 9.95731   | 14.8079   |
| ENSG00000010030 | ENSG00000010030 | ETV7          | 6:3632241 | q1 | q2 | 1.053 | -6.949  | 0 | 0     | yes | 4.2522    | 3.16885   | 5.33555    | 12.183    | 10.186    | 14.1801   |
| ENSG00000173113 | ENSG00000173113 | TRMT112       | 11:640730 | q1 | q2 | 1.054 | -9.195  | 0 | 0     | yes | 22.6609   | 18.2987   | 27.0231    | 65.0087   | 56.9176   | 73.0999   |
| ENSG00000207556 | ENSG00000207556 | MIR636        | 17:747302 | q1 | q2 | 1.055 | -42.934 | 0 | 0     | yes | 4.42696   | 4.27876   | 4.57517    | 12.7107   | 12.2536   | 13.1678   |
| ENSG00000151006 | ENSG00000151006 | PRSS53        | 16:310857 | q1 | q2 | 1.06  | -6.942  | 0 | 0     | yes | 4.31615   | 3.19323   | 5.43906    | 12.4572   | 10.4656   | 14.4488   |
| ENSG00000227617 | ENSG00000227617 | AC009475.2    | 2:1693127 | q1 | q2 | 1.062 | -5.525  | 0 | 0     | yes | 1.38579   | 0.943961  | 1.82762    | 4.00739   | 3.14701   | 4.86776   |
| ENSG00000155744 | ENSG00000155744 | FAM126B       | 2:2017736 | q1 | q2 | 1.065 | -6.226  | 0 | 0     | yes | 6.56554   | 4.88686   | 8.24423    | 19.0404   | 14.7141   | 23.3667   |
| ENSG00000119616 | ENSG00000119616 | FCF1          | 14:751798 | q1 | q2 | 1.066 | -5.003  | 0 | 0     | yes | 7.4291    | 4.73469   | 10.1235    | 21.5773   | 16.7465   | 26.4081   |
| ENSG00000003509 | ENSG00000003509 | C2orf56       | 2:3739496 | q1 | q2 | 1.079 | -9.05   | 0 | 0     | yes | 23.2746   | 18.547    | 28.0023    | 68.4453   | 59.9042   | 76.9864   |
| ENSG00000228932 | ENSG00000228932 | RP11-88G17.2  | 9:1328157 | q1 | q2 | 1.079 | -34.733 | 0 | 0     | yes | 0.0763171 | 0.0729997 | 0.0796344  | 0.224405  | 0.214451  | 0.234358  |
| ENSG00000246982 | ENSG00000246982 | RP1-179N16.6  | 6:3611447 | q1 | q2 | 1.08  | -32.368 | 0 | 0     | yes | 0.0029454 | 0.0028212 | 0.00306955 | 0.0086705 | 0.0082222 | 0.0091189 |
| ENSG00000114388 | ENSG00000114388 | NPRL2         | 3:5038476 | q1 | q2 | 1.081 | -9.051  | 0 | 0     | yes | 18.4409   | 14.6373   | 22.2445    | 54.3829   | 47.8193   | 60.9465   |
| ENSG00000204856 | ENSG00000204856 | C12orf24      | 12:110890 | q1 | q2 | 1.086 | -6.474  | 0 | 0     | yes | 5.56961   | 3.91807   | 7.22115    | 16.501    | 13.9098   | 19.0921   |
| ENSG00000171097 | ENSG00000171097 | CCBL1         | 9:1315952 | q1 | q2 | 1.094 | -6.19   | 0 | 0     | yes | 3.26793   | 2.33709   | 4.19878    | 9.75795   | 7.71598   | 11.7999   |
| ENSG00000157654 | ENSG00000157654 | PALM2-AKAP2   | 9:1124030 | q1 | q2 | 1.098 | -3.653  | 0 | 0.005 | yes | 0.7497    | 0.405493  | 1.09391    | 2.24787   | 1.37533   | 3.12041   |

|                 |                 |                 |           |    |    |       |         |   |       |     |           |           |           |           |          |          |
|-----------------|-----------------|-----------------|-----------|----|----|-------|---------|---|-------|-----|-----------|-----------|-----------|-----------|----------|----------|
| ENSG00000129194 | ENSG00000129194 | SOX15           | 17:748292 | q1 | q2 | 1.103 | -4.386  | 0 | 0     | yes | 1.80303   | 1.04622   | 2.55983   | 5.43019   | 3.92762  | 6.93275  |
| ENSG00000177981 | ENSG00000177981 | ASB8            | 12:485415 | q1 | q2 | 1.106 | -12.597 | 0 | 0     | yes | 39.415    | 33.8053   | 45.0247   | 119.105   | 106.86   | 131.35   |
| ENSG00000088876 | ENSG00000088876 | ZNF343          | 20:244227 | q1 | q2 | 1.109 | -9.974  | 0 | 0     | yes | 4.37142   | 3.59537   | 5.14747   | 13.2514   | 11.4765  | 15.0264  |
| ENSG00000249293 | ENSG00000249293 | CTC-575I10.1    | 5:7292198 | q1 | q2 | 1.109 | -19.528 | 0 | 0     | yes | 0.0855451 | 0.0791778 | 0.0919124 | 0.259376  | 0.237114 | 0.281637 |
| ENSG00000159899 | ENSG00000159899 | NPR2            | 9:3579215 | q1 | q2 | 1.115 | -3.567  | 0 | 0.007 | yes | 1.84315   | 0.935158  | 2.75114   | 5.62059   | 3.45761  | 7.78358  |
| ENSG00000186862 | ENSG00000186862 | PDZD7           | 10:102756 | q1 | q2 | 1.116 | -5.291  | 0 | 0     | yes | 3.09049   | 1.96542   | 4.21555   | 9.43215   | 7.42264  | 11.4417  |
| ENSG00000080823 | ENSG00000080823 | RAGE            | 14:102692 | q1 | q2 | 1.122 | -5.704  | 0 | 0     | yes | 8.44346   | 5.72976   | 11.1572   | 25.9296   | 20.0478  | 31.8115  |
| ENSG00000249115 | ENSG00000249115 | HAUS5           | 19:361036 | q1 | q2 | 1.141 | -11.053 | 0 | 0     | yes | 5.88639   | 4.95338   | 6.81941   | 18.4154   | 15.9814  | 20.8495  |
| ENSG00000144401 | ENSG00000144401 | METTL21A        | 2:2081043 | q1 | q2 | 1.143 | -4.016  | 0 | 0.001 | yes | 3.51839   | 1.78106   | 5.25572   | 11.0316   | 7.91006  | 14.1531  |
| ENSG00000119922 | ENSG00000119922 | IFIT2           | 10:909733 | q1 | q2 | 1.175 | -7.934  | 0 | 0     | yes | 2.06626   | 1.56792   | 2.5646    | 6.68999   | 5.54027  | 7.83971  |
| ENSG00000256349 | ENSG00000256349 | CTD-3074O7.11   | 11:662342 | q1 | q2 | 1.176 | -8.127  | 0 | 0     | yes | 2.18126   | 1.66736   | 2.69517   | 7.0714    | 5.88254  | 8.26026  |
| ENSG00000105640 | ENSG00000105640 | RPL18A          | 19:179707 | q1 | q2 | 1.186 | -11.363 | 0 | 0     | yes | 51.7198   | 43.0698   | 60.3699   | 169.353   | 148.188  | 190.517  |
| ENSG00000122406 | ENSG00000122406 | RPL5            | 1:9329759 | q1 | q2 | 1.189 | -3.756  | 0 | 0.003 | yes | 8.11115   | 3.5565    | 12.6658   | 26.6354   | 18.8474  | 34.4234  |
| ENSG00000118894 | ENSG00000118894 | FAM86A          | 16:512181 | q1 | q2 | 1.19  | -5.214  | 0 | 0     | yes | 1.13745   | 0.688554  | 1.58635   | 3.73851   | 2.88127  | 4.59575  |
| ENSG00000254876 | ENSG00000254876 | RP11-23J9.5     | 9:1000000 | q1 | q2 | 1.192 | -8.119  | 0 | 0     | yes | 0.025137  | 0.0200842 | 0.0301897 | 0.0827885 | 0.065068 | 0.100509 |
| ENSG00000167100 | ENSG00000167100 | SAMD14          | 17:481721 | q1 | q2 | 1.201 | -3.987  | 0 | 0.001 | yes | 0.633679  | 0.395312  | 0.872046  | 2.10542   | 1.11499  | 3.09585  |
| ENSG00000254772 | ENSG00000254772 | EEF1G           | 11:623270 | q1 | q2 | 1.206 | -10.669 | 0 | 0     | yes | 13.2579   | 10.9108   | 15.605    | 44.2835   | 38.0565  | 50.5104  |
| ENSG00000249007 | ENSG00000249007 | RP11-510N19.5   | 1:2019514 | q1 | q2 | 1.209 | -3.944  | 0 | 0.002 | yes | 1.70697   | 0.799568  | 2.61437   | 5.71898   | 3.97155  | 7.46641  |
| ENSG00000189337 | ENSG00000189337 | KAZN            | 1:1492519 | q1 | q2 | 1.22  | -5.341  | 0 | 0     | yes | 2.12773   | 1.31848   | 2.93697   | 7.20561   | 5.38275  | 9.02848  |
| ENSG00000244513 | ENSG00000244513 | CTD-2013N24.2   | 3:6906327 | q1 | q2 | 1.223 | -13.418 | 0 | 0     | yes | 0.0553102 | 0.0487691 | 0.0618513 | 0.187868  | 0.161815 | 0.213921 |
| ENSG00000095574 | ENSG00000095574 | IKZF5           | 10:124690 | q1 | q2 | 1.225 | -3.78   | 0 | 0.003 | yes | 2.90671   | 1.62243   | 4.19099   | 9.89225   | 5.20308  | 14.5814  |
| ENSG00000255152 | ENSG00000255152 | MSH5-C6orf26    | 6:3170772 | q1 | q2 | 1.234 | -5.643  | 0 | 0     | yes | 1.75903   | 1.1856    | 2.33245   | 6.04201   | 4.28016  | 7.80387  |
| ENSG00000203279 | ENSG00000203279 | RP11-498P14.5   | 9:1000000 | q1 | q2 | 1.24  | -8.744  | 0 | 0     | yes | 0.0380334 | 0.0303884 | 0.0456784 | 0.131387  | 0.105109 | 0.157664 |
| ENSG00000156970 | ENSG00000156970 | BUB1B           | 15:404532 | q1 | q2 | 1.243 | -11.432 | 0 | 0     | yes | 3.43313   | 2.8078    | 4.05847   | 11.9036   | 10.4884  | 13.3189  |
| ENSG00000118263 | ENSG00000118263 | KLF7            | 2:2079388 | q1 | q2 | 1.259 | -3.827  | 0 | 0.003 | yes | 5.24757   | 2.13092   | 8.36422   | 18.4892   | 13.2415  | 23.7369  |
| ENSG00000154309 | ENSG00000154309 | DISP1           | 1:2229883 | q1 | q2 | 1.265 | -4.668  | 0 | 0     | yes | 1.24465   | 0.71134   | 1.77795   | 4.41136   | 2.94646  | 5.87626  |
| ENSG00000174444 | ENSG00000174444 | RPL4            | 15:667908 | q1 | q2 | 1.282 | -10.208 | 0 | 0     | yes | 17.8381   | 14.1494   | 21.5268   | 64.3162   | 55.1346  | 73.4977  |
| ENSG00000166348 | ENSG00000166348 | USP54           | 10:751961 | q1 | q2 | 1.286 | -8.274  | 0 | 0     | yes | 9.51352   | 7.0577    | 11.9693   | 34.4077   | 28.4553  | 40.3601  |
| ENSG00000121236 | ENSG00000121236 | TRIM6           | 11:527441 | q1 | q2 | 1.305 | -4.224  | 0 | 0.001 | yes | 0.635799  | 0.342391  | 0.929208  | 2.34359   | 1.38159  | 3.30558  |
| ENSG00000243135 | ENSG00000243135 | UGT1A3          | 2:2345262 | q1 | q2 | 1.307 | -6.464  | 0 | 0     | yes | 1.46264   | 0.956513  | 1.96878   | 5.40433   | 4.27369  | 6.53498  |
| ENSG00000160062 | ENSG00000160062 | ZBTB8A          | 1:3293065 | q1 | q2 | 1.31  | -3.714  | 0 | 0.004 | yes | 0.573468  | 0.218483  | 0.928452  | 2.1248    | 1.40649  | 2.84311  |
| ENSG00000256223 | ENSG00000256223 | ZNF10           | 12:133707 | q1 | q2 | 1.314 | -4.559  | 0 | 0     | yes | 0.254865  | 0.135511  | 0.374219  | 0.948427  | 0.629537 | 1.26732  |
| ENSG00000183077 | ENSG00000183077 | AFMID           | 17:761833 | q1 | q2 | 1.337 | -8.612  | 0 | 0     | yes | 6.46081   | 5.00849   | 7.91314   | 24.6074   | 19.3344  | 29.8803  |
| ENSG00000242257 | ENSG00000242257 | AC044839.1      | 11:458481 | q1 | q2 | 1.341 | -3.917  | 0 | 0.002 | yes | 107.414   | 42.6409   | 172.187   | 410.733   | 277.473  | 543.992  |
| ENSG00000144802 | ENSG00000144802 | NFKBIZ          | 3:1014980 | q1 | q2 | 1.346 | -8.529  | 0 | 0     | yes | 5.42436   | 4.31009   | 6.53863   | 20.846    | 15.8494  | 25.8426  |
| ENSG00000256142 | ENSG00000256142 | AL513327.1      | 1:3372214 | q1 | q2 | 1.347 | -4.049  | 0 | 0.001 | yes | 0.962019  | 0.397731  | 1.52631   | 3.70155   | 2.53701  | 4.86609  |
| ENSG00000147687 | ENSG00000147687 | TATDN1          | 8:1255007 | q1 | q2 | 1.35  | -8.795  | 0 | 0     | yes | 10.8226   | 7.93491   | 13.7104   | 41.7491   | 35.4086  | 48.0897  |
| ENSG00000105519 | ENSG00000105519 | CAPS            | 19:591138 | q1 | q2 | 1.352 | -9.455  | 0 | 0     | yes | 4.04274   | 3.05306   | 5.03243   | 15.6181   | 13.3123  | 17.9239  |
| ENSG00000100629 | ENSG00000100629 | CEP128          | 14:809433 | q1 | q2 | 1.357 | -5.126  | 0 | 0     | yes | 3.83187   | 2.05679   | 5.60696   | 14.8778   | 11.0701  | 18.6855  |
| ENSG00000138442 | ENSG00000138442 | WDR12           | 2:2037453 | q1 | q2 | 1.364 | -7.628  | 0 | 0     | yes | 10.7902   | 8.00839   | 13.572    | 42.1896   | 31.7397  | 52.6396  |
| ENSG00000169062 | ENSG00000169062 | UPF3A           | 13:115047 | q1 | q2 | 1.364 | -4.033  | 0 | 0.001 | yes | 3.98767   | 1.95202   | 6.02333   | 15.5932   | 8.67727  | 22.5091  |
| ENSG00000226763 | ENSG00000226763 | SRRM5           | 19:441005 | q1 | q2 | 1.365 | -6.739  | 0 | 0     | yes | 1.20748   | 0.779482  | 1.63547   | 4.72629   | 3.80038  | 5.6522   |
| ENSG00000164048 | ENSG00000164048 | ZNF589          | 3:4828258 | q1 | q2 | 1.371 | -7.243  | 0 | 0     | yes | 1.4373    | 1.03256   | 1.84203   | 5.65917   | 4.22821  | 7.09014  |
| ENSG00000242095 | ENSG00000242095 | AC062037.1      | 2:8556921 | q1 | q2 | 1.373 | -31.29  | 0 | 0     | yes | 0.151867  | 0.142718  | 0.161017  | 0.599304  | 0.561074 | 0.637534 |
| ENSG00000226099 | ENSG00000226099 | RP11-544L8__B.2 | 6:1142541 | q1 | q2 | 1.416 | -39.999 | 0 | 0     | yes | 0.152785  | 0.14538   | 0.160189  | 0.629326  | 0.59686  | 0.661792 |
| ENSG00000073910 | ENSG00000073910 | FRY             | 13:325994 | q1 | q2 | 1.432 | -3.756  | 0 | 0.003 | yes | 1.21569   | 0.518242  | 1.91313   | 5.08765   | 2.53354  | 7.64176  |
| ENSG00000119684 | ENSG00000119684 | MLH3            | 14:754804 | q1 | q2 | 1.443 | -4.378  | 0 | 0     | yes | 7.10995   | 2.53915   | 11.6808   | 30.0914   | 25.7162  | 34.4665  |
| ENSG00000234141 | ENSG00000234141 | AC009473.1      | 7:7676148 | q1 | q2 | 1.452 | -27.733 | 0 | 0     | yes | 0.0456347 | 0.0422497 | 0.0490197 | 0.194955  | 0.180544 | 0.209366 |
| ENSG00000226677 | ENSG00000226677 | RP11-85K15.1    | 14:353900 | q1 | q2 | 1.453 | -35.472 | 0 | 0     | yes | 0.0560201 | 0.0528384 | 0.0592019 | 0.23942   | 0.225294 | 0.253547 |
| ENSG00000255782 | ENSG00000255782 | Z83840.1        | 22:419567 | q1 | q2 | 1.47  | -5.341  | 0 | 0     | yes | 0.948394  | 0.482716  | 1.41407   | 4.12498   | 3.09828  | 5.15168  |



|                 |                 |               |           |    |    |       |         |   |       |     |           |           |           |           |           |           |
|-----------------|-----------------|---------------|-----------|----|----|-------|---------|---|-------|-----|-----------|-----------|-----------|-----------|-----------|-----------|
| ENSG00000182004 | ENSG00000182004 | SNRPE         | 1:2038307 | q1 | q2 | 1.474 | -4.081  | 0 | 0.001 | yes | 13.2173   | 4.58458   | 21.85     | 57.7134   | 39.8985   | 75.5284   |
| ENSG00000114670 | ENSG00000114670 | NEK11         | 3:1305694 | q1 | q2 | 1.481 | -5.84   | 0 | 0     | yes | 2.89387   | 1.48122   | 4.30651   | 12.7272   | 10.9735   | 14.4809   |
| ENSG00000179988 | ENSG00000179988 | PSTK          | 10:124690 | q1 | q2 | 1.484 | -6.446  | 0 | 0     | yes | 2.40018   | 1.50954   | 3.29082   | 10.5886   | 7.70055   | 13.4766   |
| ENSG00000225721 | ENSG00000225721 | RP11-269F19.2 | 1:4520548 | q1 | q2 | 1.501 | -4.09   | 0 | 0.001 | yes | 2.46015   | 0.836469  | 4.08383   | 11.0388   | 7.49205   | 14.5856   |
| ENSG00000134780 | ENSG00000134780 | DAGLA         | 11:614479 | q1 | q2 | 1.511 | -14.846 | 0 | 0     | yes | 2.69819   | 2.23181   | 3.16458   | 12.2229   | 10.9097   | 13.5362   |
| ENSG00000164306 | ENSG00000164306 | CCDC111       | 4:1855707 | q1 | q2 | 1.521 | -5.466  | 0 | 0     | yes | 3.19395   | 1.52131   | 4.86659   | 14.6202   | 11.8661   | 17.3743   |
| ENSG00000125966 | ENSG00000125966 | MMP24         | 20:337031 | q1 | q2 | 1.544 | -7.513  | 0 | 0     | yes | 0.699035  | 0.440888  | 0.957181  | 3.27415   | 2.68302   | 3.86529   |
| ENSG00000234134 | ENSG00000234134 | RP11-383C5.5  | 10:127371 | q1 | q2 | 1.558 | -18.915 | 0 | 0     | yes | 0.197029  | 0.173687  | 0.220371  | 0.936042  | 0.828847  | 1.04324   |
| ENSG00000105793 | ENSG00000105793 | GTPBP10       | 7:8996453 | q1 | q2 | 1.565 | -11.032 | 0 | 0     | yes | 13.6827   | 10.1716   | 17.1938   | 65.4398   | 57.5209   | 73.3587   |
| ENSG00000220378 | ENSG00000220378 | KRT8P42       | 6:1344903 | q1 | q2 | 1.568 | -6.16   | 0 | 0     | yes | 0.012738  | 0.008492  | 0.016984  | 0.0611179 | 0.0375936 | 0.0846422 |
| ENSG00000186615 | ENSG00000186615 | C14orf33      | 14:559659 | q1 | q2 | 1.57  | -4.222  | 0 | 0.001 | yes | 1.37975   | 0.403104  | 2.3564    | 6.63106   | 5.11921   | 8.1429    |
| ENSG00000066651 | ENSG00000066651 | TRMT11        | 6:1263075 | q1 | q2 | 1.582 | -3.809  | 0 | 0.003 | yes | 1.29003   | 0.568527  | 2.01154   | 6.27442   | 2.42219   | 10.1267   |
| ENSG00000213145 | ENSG00000213145 | CRIP1         | 14:105952 | q1 | q2 | 1.611 | -7.881  | 0 | 0     | yes | 3.39633   | 2.12748   | 4.66517   | 17.0118   | 14.1839   | 19.8397   |
| ENSG00000256390 | ENSG00000256390 | AC092143.2    | 16:899785 | q1 | q2 | 1.623 | -6.014  | 0 | 0     | yes | 0.865724  | 0.445119  | 1.28633   | 4.38733   | 3.3559    | 5.41876   |
| ENSG00000142794 | ENSG00000142794 | NBPF3         | 1:2176662 | q1 | q2 | 1.631 | -5.902  | 0 | 0     | yes | 2.23188   | 1.40071   | 3.06305   | 11.397    | 6.74577   | 16.0482   |
| ENSG00000136367 | ENSG00000136367 | ZFHX2         | 14:239809 | q1 | q2 | 1.651 | -4.515  | 0 | 0     | yes | 0.735475  | 0.276591  | 1.19436   | 3.83244   | 2.37144   | 5.29343   |
| ENSG00000111291 | ENSG00000111291 | GPRC5D        | 12:130806 | q1 | q2 | 1.671 | -5.289  | 0 | 0     | yes | 3.29375   | 1.32185   | 5.26566   | 17.5101   | 13.9734   | 21.0467   |
| ENSG00000250299 | ENSG00000250299 | RP11-78J21.2  | 13:531916 | q1 | q2 | 1.707 | -4.123  | 0 | 0.001 | yes | 0.0037221 | 0.001368  | 0.0060761 | 0.0205182 | 0.0095508 | 0.0314857 |
| ENSG00000111249 | ENSG00000111249 | CUX2          | 12:111471 | q1 | q2 | 1.713 | -3.592  | 0 | 0.006 | yes | 0.270794  | 0.146545  | 0.395043  | 1.50103   | 0.246422  | 2.75564   |
| ENSG00000184731 | ENSG00000184731 | FAM110C       | 2:38813-4 | q1 | q2 | 1.728 | -5.676  | 0 | 0     | yes | 11.0912   | 4.56163   | 17.6209   | 62.4419   | 52.7203   | 72.1635   |
| ENSG00000234741 | ENSG00000234741 | GAS5          | 1:1738312 | q1 | q2 | 1.73  | -7.668  | 0 | 0     | yes | 8.78912   | 5.82769   | 11.7505   | 49.5578   | 34.6905   | 64.4251   |
| ENSG00000166839 | ENSG00000166839 | ANKDD1A       | 15:651340 | q1 | q2 | 1.747 | -5.333  | 0 | 0     | yes | 1.15169   | 0.490665  | 1.81271   | 6.60608   | 4.51959   | 8.69258   |
| ENSG00000169239 | ENSG00000169239 | CA5B          | X:1569305 | q1 | q2 | 1.747 | -5.985  | 0 | 0     | yes | 2.33021   | 1.15874   | 3.50168   | 13.3703   | 9.40163   | 17.339    |
| ENSG00000111671 | ENSG00000111671 | SPSB2         | 12:697628 | q1 | q2 | 1.755 | -11.217 | 0 | 0     | yes | 5.09374   | 3.6579    | 6.52958   | 29.4681   | 25.4606   | 33.4755   |
| ENSG00000232536 | ENSG00000232536 | RP11-74C1.4   | 1:1515127 | q1 | q2 | 1.775 | -45.18  | 0 | 0     | yes | 0.0463243 | 0.0438248 | 0.0488237 | 0.273218  | 0.257618  | 0.288818  |
| ENSG00000152056 | ENSG00000152056 | AP1S3         | 2:2246164 | q1 | q2 | 1.792 | -4.886  | 0 | 0     | yes | 2.63897   | 1.17438   | 4.10356   | 15.8304   | 8.24296   | 23.4178   |
| ENSG00000232073 | ENSG00000232073 | RP1-302D9.3   | 22:335600 | q1 | q2 | 1.792 | -3.697  | 0 | 0.004 | yes | 0.204091  | 0.193981  | 0.214201  | 1.22482   | 0.0388741 | 2.41077   |
| ENSG00000258395 | ENSG00000258395 | RP11-65I12.1  | 2:1139690 | q1 | q2 | 1.796 | -3.559  | 0 | 0.007 | yes | 0.181099  | 0.165076  | 0.197122  | 1.09128   | 0         | 2.1884    |
| ENSG00000243902 | ENSG00000243902 | RP1-63G5.5    | 22:377356 | q1 | q2 | 1.801 | -6.327  | 0 | 0     | yes | 4.36843   | 2.06965   | 6.66721   | 26.4539   | 20.7099   | 32.1978   |
| ENSG00000164404 | ENSG00000164404 | GDF9          | 5:1321968 | q1 | q2 | 1.812 | -4.845  | 0 | 0     | yes | 0.558831  | 0.226037  | 0.891626  | 3.42103   | 1.87262   | 4.96943   |
| ENSG00000226360 | ENSG00000226360 | RPL10AP6      | 3:6154724 | q1 | q2 | 1.819 | -14.868 | 0 | 0     | yes | 19.5068   | 15.293    | 23.7205   | 120.258   | 106.439   | 134.077   |
| ENSG00000236830 | ENSG00000236830 | AP000689.8    | 21:375026 | q1 | q2 | 1.849 | -8.136  | 0 | 0     | yes | 3.06831   | 1.75581   | 4.38081   | 19.4865   | 16.4969   | 22.4761   |
| ENSG00000254909 | ENSG00000254909 | RP11-110I1.5  | 11:118868 | q1 | q2 | 1.85  | -3.704  | 0 | 0.004 | yes | 1.95934   | 1.8772    | 2.04147   | 12.4598   | 0.0256351 | 24.894    |
| ENSG00000225374 | ENSG00000225374 | GS1-526D21.5  | X:1375283 | q1 | q2 | 1.854 | -12.866 | 0 | 0     | yes | 0.0511991 | 0.0414799 | 0.0609183 | 0.327023  | 0.256082  | 0.397965  |
| ENSG00000228604 | ENSG00000228604 | RP5-872K7.7   | 20:211066 | q1 | q2 | 1.87  | -10.281 | 0 | 0     | yes | 0.0331158 | 0.0245654 | 0.0416663 | 0.214808  | 0.159778  | 0.269839  |
| ENSG00000175344 | ENSG00000175344 | CHRNA7        | 15:308571 | q1 | q2 | 1.906 | -36.497 | 0 | 0     | yes | 0.049072  | 0.0455282 | 0.0526158 | 0.329945  | 0.305057  | 0.354834  |
| ENSG00000186792 | ENSG00000186792 | HYAL3         | 3:5031645 | q1 | q2 | 1.913 | -5.637  | 0 | 0     | yes | 1.78679   | 0.612038  | 2.96154   | 12.0995   | 10.0641   | 14.1349   |
| ENSG00000212978 | ENSG00000212978 | AC016747.3    | 2:6129300 | q1 | q2 | 1.919 | -6.15   | 0 | 0     | yes | 2.54299   | 1.10045   | 3.98553   | 17.3287   | 12.8206   | 21.8369   |
| ENSG00000254673 | ENSG00000254673 | RP11-598P20.5 | 8:4270477 | q1 | q2 | 1.926 | -3.575  | 0 | 0.006 | yes | 0.12693   | 0.109854  | 0.144007  | 0.871056  | 0         | 1.80229   |
| ENSG00000179583 | ENSG00000179583 | CIITA         | 16:109710 | q1 | q2 | 1.927 | -4.188  | 0 | 0.001 | yes | 0.190623  | 0.0403065 | 0.34094   | 1.30873   | 0.688707  | 1.92876   |
| ENSG00000206567 | ENSG00000206567 | AC022007.5    | 3:1000422 | q1 | q2 | 1.931 | -8.186  | 0 | 0     | yes | 2.50596   | 1.43209   | 3.57984   | 17.2758   | 13.8695   | 20.6821   |
| ENSG00000139988 | ENSG00000139988 | RDH12         | 14:681686 | q1 | q2 | 1.938 | -4.171  | 0 | 0.001 | yes | 0.185436  | 0.173165  | 0.197707  | 1.28808   | 0.0941229 | 2.48204   |
| ENSG00000244468 | ENSG00000244468 | RP11-206M11.7 | 3:1489471 | q1 | q2 | 1.938 | -6.53   | 0 | 0     | yes | 3.62047   | 1.63852   | 5.60241   | 25.1388   | 19.3734   | 30.9043   |
| ENSG00000119638 | ENSG00000119638 | NEK9          | 14:755488 | q1 | q2 | 1.987 | -7.377  | 0 | 0     | yes | 2.03784   | 1.06419   | 3.01149   | 14.8654   | 11.166    | 18.5648   |
| ENSG00000101230 | ENSG00000101230 | ISM1          | 20:132024 | q1 | q2 | 2.018 | -4.274  | 0 | 0     | yes | 0.216234  | 0.0251371 | 0.40733   | 1.62717   | 1.08489   | 2.16944   |
| ENSG00000184635 | ENSG00000184635 | ZNF93         | 19:200117 | q1 | q2 | 2.032 | -4.683  | 0 | 0     | yes | 0.504256  | 0.173782  | 0.834729  | 3.84715   | 1.659     | 6.03531   |
| ENSG00000161970 | ENSG00000161970 | RPL26         | 17:828083 | q1 | q2 | 2.038 | -10.251 | 0 | 0     | yes | 7.74294   | 4.96159   | 10.5243   | 59.4416   | 49.3006   | 69.5826   |
| ENSG00000255185 | ENSG00000255185 | RP11-106J23.2 | 16:700101 | q1 | q2 | 2.043 | -7.414  | 0 | 0     | yes | 2.87993   | 1.43939   | 4.32048   | 22.2224   | 17.0764   | 27.3685   |
| ENSG00000106069 | ENSG00000106069 | CHN2          | 7:2903484 | q1 | q2 | 2.083 | -5.755  | 0 | 0     | yes | 1.82408   | 0.608177  | 3.03999   | 14.6395   | 10.5117   | 18.7673   |
| ENSG00000249755 | ENSG00000249755 | RP11-466G12.2 | 4:8944213 | q1 | q2 | 2.113 | -40.3   | 0 | 0     | yes | 0.0148092 | 0.013727  | 0.0158915 | 0.122538  | 0.113321  | 0.131755  |

|                 |                 |                |           |    |    |       |         |   |       |     |           |           |            |           |           |           |
|-----------------|-----------------|----------------|-----------|----|----|-------|---------|---|-------|-----|-----------|-----------|------------|-----------|-----------|-----------|
| ENSG00000225673 | ENSG00000225673 | RP11-641C17.3  | 3:5973503 | q1 | q2 | 2.115 | -3.548  | 0 | 0.007 | yes | 0.778658  | 0         | 1.65038    | 6.45328   | 3.813     | 9.09356   |
| ENSG00000204977 | ENSG00000204977 | TRIM13         | 13:505700 | q1 | q2 | 2.127 | -5.242  | 0 | 0     | yes | 1.13578   | 0.427189  | 1.84437    | 9.52789   | 4.58279   | 14.473    |
| ENSG00000173451 | ENSG00000173451 | THAP2          | 12:720032 | q1 | q2 | 2.134 | -5.739  | 0 | 0     | yes | 1.51426   | 0.476604  | 2.55192    | 12.7893   | 9.09748   | 16.4811   |
| ENSG00000233221 | ENSG00000233221 | AC133785.1     | 2:1315885 | q1 | q2 | 2.162 | -6.298  | 0 | 0     | yes | 0.0732072 | 0.0621392 | 0.0842751  | 0.635898  | 0.210067  | 1.06173   |
| ENSG00000180815 | ENSG00000180815 | MAP3K15        | X:1936201 | q1 | q2 | 2.194 | -5.147  | 0 | 0     | yes | 0.0302326 | 0.0284919 | 0.0319732  | 0.271118  | 0.040568  | 0.501668  |
| ENSG00000216324 | ENSG00000216324 | RP3-38210.2    | 6:8811770 | q1 | q2 | 2.217 | -4.735  | 0 | 0     | yes | 0.543705  | 0.500312  | 0.587097   | 4.99061   | 0.333962  | 9.64726   |
| ENSG00000105825 | ENSG00000105825 | TFPI2          | 7:9322088 | q1 | q2 | 2.236 | -4.713  | 0 | 0     | yes | 1.05783   | 0.112055  | 2.00361    | 9.89849   | 6.75333   | 13.0436   |
| ENSG00000122026 | ENSG00000122026 | RPL21          | 13:278254 | q1 | q2 | 2.346 | -11.79  | 0 | 0     | yes | 8.99035   | 5.66021   | 12.3205    | 93.9132   | 80.2432   | 107.583   |
| ENSG00000146376 | ENSG00000146376 | ARHGAP18       | 6:1298972 | q1 | q2 | 2.352 | -18.312 | 0 | 0     | yes | 4.86966   | 3.97277   | 5.76655    | 51.142    | 41.9876   | 60.2964   |
| ENSG00000179902 | ENSG00000179902 | C1orf194       | 1:1096485 | q1 | q2 | 2.354 | -3.841  | 0 | 0.003 | yes | 1.22358   | 0         | 2.68969    | 12.8782   | 9.55248   | 16.2039   |
| ENSG00000234608 | ENSG00000234608 | AC003029.1     | 12:112277 | q1 | q2 | 2.364 | -12.622 | 0 | 0     | yes | 4.09244   | 2.63422   | 5.55067    | 43.523    | 38.4902   | 48.5558   |
| ENSG00000247708 | ENSG00000247708 | RP11-323F5.2   | 4:4349866 | q1 | q2 | 2.385 | -3.545  | 0 | 0.007 | yes | 0.506728  | 0         | 1.15048    | 5.50166   | 3.06128   | 7.94204   |
| ENSG00000198496 | ENSG00000198496 | NBR2           | 17:411963 | q1 | q2 | 2.413 | -9.936  | 0 | 0     | yes | 0.136018  | 0.123022  | 0.149014   | 1.51897   | 0.79563   | 2.24231   |
| ENSG00000168505 | ENSG00000168505 | GBX2           | 2:2370738 | q1 | q2 | 2.432 | -5.077  | 0 | 0     | yes | 0.245329  | 0.0401342 | 0.450524   | 2.79161   | 1.48826   | 4.09495   |
| ENSG00000197647 | ENSG00000197647 | ZNF433         | 19:120984 | q1 | q2 | 2.435 | -6.956  | 0 | 0     | yes | 0.227162  | 0.143737  | 0.310587   | 2.59311   | 1.04765   | 4.13857   |
| ENSG00000224295 | ENSG00000224295 | AC087380.14    | 11:527441 | q1 | q2 | 2.468 | -5.296  | 0 | 0     | yes | 0.033674  | 0.0268004 | 0.0405477  | 0.397277  | 0.0360361 | 0.758519  |
| ENSG00000185666 | ENSG00000185666 | SYN3           | 22:329085 | q1 | q2 | 2.483 | -6.012  | 0 | 0     | yes | 0.104849  | 0.0988546 | 0.110843   | 1.2561    | 0.221008  | 2.29119   |
| ENSG00000223442 | ENSG00000223442 | AC004041.2     | 5:1318771 | q1 | q2 | 2.529 | -6.876  | 0 | 0     | yes | 3.69546   | 1.08099   | 6.30993    | 46.3407   | 37.0097   | 55.6718   |
| ENSG00000234695 | ENSG00000234695 | AC002076.10    | 7:9322088 | q1 | q2 | 2.542 | -4.749  | 0 | 0     | yes | 0.0924012 | 0.0723565 | 0.112446   | 1.17368   | 0         | 2.40397   |
| ENSG00000237298 | ENSG00000237298 | AC009948.3     | 2:1793875 | q1 | q2 | 2.551 | -13.328 | 0 | 0     | yes | 0.0103548 | 0.0074788 | 0.0132308  | 0.132683  | 0.0977447 | 0.167621  |
| ENSG00000185736 | ENSG00000185736 | ADARB2         | 10:122807 | q1 | q2 | 2.578 | -4.109  | 0 | 0.001 | yes | 0.210153  | 0         | 0.430822   | 2.76844   | 0.866335  | 4.67054   |
| ENSG00000256980 | ENSG00000256980 | RP11-257K9.7   | 6:7391859 | q1 | q2 | 2.617 | -3.584  | 0 | 0.006 | yes | 0.55489   | 0         | 1.34947    | 7.59817   | 5.41906   | 9.77729   |
| ENSG00000180929 | ENSG00000180929 | GPR62          | 3:5198932 | q1 | q2 | 2.622 | -4.169  | 0 | 0.001 | yes | 0.0097482 | 0.0092396 | 0.0102569  | 0.134177  | 0         | 0.302794  |
| ENSG00000248710 | ENSG00000248710 | RP11-432B6.3   | 3:1599434 | q1 | q2 | 2.624 | -4.874  | 0 | 0     | yes | 0.111685  | 0         | 0.227407   | 1.5407    | 1.0885    | 1.9929    |
| ENSG00000167588 | ENSG00000167588 | GPD1           | 12:504976 | q1 | q2 | 2.673 | -3.547  | 0 | 0.007 | yes | 0.0986082 | 0         | 0.212471   | 1.42809   | 0.04445   | 2.81173   |
| ENSG00000248778 | ENSG00000248778 | RP11-311D14.1  | 4:1064737 | q1 | q2 | 2.693 | -7.541  | 0 | 0     | yes | 0.0662568 | 0.0632788 | 0.0692348  | 0.978738  | 0.281156  | 1.67632   |
| ENSG00000240793 | ENSG00000240793 | CTD-2600H12.1  | 16:482008 | q1 | q2 | 2.697 | -4.227  | 0 | 0.001 | yes | 0.0954616 | 0.089927  | 0.100996   | 1.41577   | 0         | 3.22052   |
| ENSG00000236449 | ENSG00000236449 | AC018890.6     | 2:1754118 | q1 | q2 | 2.702 | -20.629 | 0 | 0     | yes | 0.0027134 | 0.0022427 | 0.00318401 | 0.0404733 | 0.0325257 | 0.0484208 |
| ENSG0000023839  | ENSG0000023839  | ABCC2          | 10:101542 | q1 | q2 | 2.706 | -3.774  | 0 | 0.003 | yes | 0.162058  | 0         | 0.361603   | 2.42529   | 0.642922  | 4.20766   |
| ENSG00000232748 | ENSG00000232748 | AC135050.1     | 16:310721 | q1 | q2 | 2.728 | -4.412  | 0 | 0     | yes | 0.607486  | 0         | 1.33301    | 9.2956    | 6.30971   | 12.2815   |
| ENSG00000145425 | ENSG00000145425 | RPS3A          | 4:1520207 | q1 | q2 | 2.754 | -8.012  | 0 | 0     | yes | 4.114     | 1.37413   | 6.85387    | 64.6073   | 53.5846   | 75.6299   |
| ENSG00000240216 | ENSG00000240216 | CPHL1P         | 3:1489471 | q1 | q2 | 2.784 | -4.117  | 0 | 0.001 | yes | 0.154785  | 0.0195554 | 0.290015   | 2.50556   | 0         | 5.09235   |
| ENSG00000242128 | ENSG00000242128 | AC079767.2     | 2:2081043 | q1 | q2 | 2.786 | -6.675  | 0 | 0     | yes | 0.524226  | 0.46535   | 0.583101   | 8.49849   | 1.46947   | 15.5275   |
| ENSG00000254553 | ENSG00000254553 | RP1-27O5.3     | 1:3293065 | q1 | q2 | 2.812 | -7.022  | 0 | 0     | yes | 0.0128008 | 0.0103924 | 0.0152092  | 0.213102  | 0.0471962 | 0.379009  |
| ENSG00000225951 | ENSG00000225951 | RP11-339B21.9  | 9:1312174 | q1 | q2 | 2.813 | -6.461  | 0 | 0     | yes | 0.16269   | 0.152663  | 0.172718   | 2.70964   | 0.35618   | 5.06309   |
| ENSG00000249967 | ENSG00000249967 | RP11-548K23.11 | 10:993440 | q1 | q2 | 2.82  | -6.113  | 0 | 0     | yes | 0.0179821 | 0.0165248 | 0.0194395  | 0.301567  | 0.0244568 | 0.578678  |
| ENSG00000176386 | ENSG00000176386 | CDC26          | 9:1159838 | q1 | q2 | 2.857 | -6.659  | 0 | 0     | yes | 1.08979   | 0.179418  | 2.00017    | 18.9701   | 15.2531   | 22.687    |
| ENSG00000237307 | ENSG00000237307 | SRRM1P3        | X:1359915 | q1 | q2 | 2.886 | -3.802  | 0 | 0.003 | yes | 0.171164  | 0         | 0.423362   | 3.06757   | 1.9443    | 4.19085   |
| ENSG00000243284 | ENSG00000243284 | VSIG8          | 1:1597965 | q1 | q2 | 2.923 | -4.376  | 0 | 0     | yes | 0.0082348 | 0.0057519 | 0.0107176  | 0.153124  | 0         | 0.35241   |
| ENSG00000158859 | ENSG00000158859 | ADAMTS4        | 1:1611595 | q1 | q2 | 2.926 | -3.503  | 0 | 0.008 | yes | 0.0360954 | 0         | 0.0936158  | 0.67347   | 0.335593  | 1.01135   |
| ENSG00000224489 | ENSG00000224489 | RP11-179H18.8  | 10:121410 | q1 | q2 | 2.949 | -3.567  | 0 | 0.007 | yes | 0.604036  | 0         | 1.57732    | 11.5274   | 7.25468   | 15.8002   |
| ENSG00000163467 | ENSG00000163467 | C1orf182       | 1:1562787 | q1 | q2 | 2.989 | -7.226  | 0 | 0     | yes | 1.12327   | 0.243076  | 2.00346    | 22.3246   | 16.3929   | 28.2562   |
| ENSG00000247853 | ENSG00000247853 | AC006064.1     | 12:667924 | q1 | q2 | 2.993 | -5.067  | 0 | 0     | yes | 0.007559  | 0.0073446 | 0.00777333 | 0.150735  | 0         | 0.328735  |
| ENSG00000249825 | ENSG00000249825 | CTD-2201I18.1  | 5:7928713 | q1 | q2 | 3.068 | -4.826  | 0 | 0     | yes | 0.006362  | 0.0023352 | 0.0103888  | 0.136711  | 0         | 0.287433  |
| ENSG00000111837 | ENSG00000111837 | MAK            | 6:1074797 | q1 | q2 | 3.083 | -12.236 | 0 | 0     | yes | 0.0497479 | 0.0333577 | 0.0661382  | 1.08533   | 0.671553  | 1.4991    |
| ENSG00000152256 | ENSG00000152256 | PDK1           | 2:1732920 | q1 | q2 | 3.109 | -12.657 | 0 | 0     | yes | 0.185204  | 0.149251  | 0.221158   | 4.14895   | 2.27652   | 6.02138   |
| ENSG00000250741 | ENSG00000250741 | NT5C1B-RDH14   | 2:1873598 | q1 | q2 | 3.111 | -3.719  | 0 | 0.004 | yes | 0.0731667 | 0         | 0.192669   | 1.64175   | 1.04619   | 2.23732   |
| ENSG00000080573 | ENSG00000080573 | COL5A3         | 19:100702 | q1 | q2 | 3.2   | -4.606  | 0 | 0     | yes | 0.0475538 | 0         | 0.102464   | 1.16628   | 0.264895  | 2.06767   |
| ENSG00000153071 | ENSG00000153071 | DAB2           | 5:3928436 | q1 | q2 | 3.248 | -8.876  | 0 | 0     |     | 1.33349   | 0.529906  | 2.13708    | 34.3386   | 20.0717   | 48.6055   |
| ENSG00000216306 | ENSG00000216306 | RP11-3K15.1    | 12:952279 | q1 | q2 | 3.409 | -5.577  | 0 | 0     | yes | 0.346277  | 0         | 0.758161   | 10.4662   | 7.51591   | 13.4165   |

|                 |                 |               |           |    |    |           |           |   |           |           |           |            |           |           |           |
|-----------------|-----------------|---------------|-----------|----|----|-----------|-----------|---|-----------|-----------|-----------|------------|-----------|-----------|-----------|
| ENSG00000198189 | ENSG00000198189 | HSD17B11      | 4:8822494 | q1 | q2 | 3.482     | -8.41     | 0 | 0 yes     | 0.156701  | 0.0962387 | 0.217164   | 5.09497   | 1.36234   | 8.8276    |
| ENSG00000245562 | ENSG00000245562 | RP11-367J11.3 | 4:7096297 | q1 | q2 | 3.557     | -4.11     | 0 | 0.001 yes | 0.118576  | 0         | 0.246811   | 4.15765   | 0         | 9.77603   |
| ENSG00000067601 | ENSG00000067601 | PMS2P4        | 7:6675252 | q1 | q2 | 3.559     | -3.955    | 0 | 0.002 yes | 0.20165   | 0         | 0.555821   | 7.08481   | 4.30618   | 9.86343   |
| ENSG00000163815 | ENSG00000163815 | CLEC3B        | 3:4495674 | q1 | q2 | 3.661     | -7.706    | 0 | 0 yes     | 0.609817  | 0.0412227 | 1.17841    | 23.7108   | 19.3952   | 28.0264   |
| ENSG00000235471 | ENSG00000235471 | AL033532.1    | 1:1680487 | q1 | q2 | 3.725     | -12.206   | 0 | 0 yes     | 0.0159195 | 0.0115461 | 0.020293   | 0.660224  | 0.300376  | 1.02007   |
| ENSG00000159409 | ENSG00000159409 | CELF3         | 1:1516735 | q1 | q2 | 3.732     | -14.479   | 0 | 0 yes     | 0.270483  | 0.176121  | 0.364844   | 11.2932   | 7.00741   | 15.5789   |
| ENSG00000226352 | ENSG00000226352 | RP11-523H24.3 | 13:202487 | q1 | q2 | 3.759     | -7.338    | 0 | 0 yes     | 0.0535864 | 0.0505624 | 0.0566105  | 2.29863   | 0         | 4.64989   |
| ENSG00000258545 | ENSG00000258545 | RP4-755D9.1   | X:1191702 | q1 | q2 | 3.931     | -4.764    | 0 | 0 yes     | 0.0952527 | 0         | 0.243815   | 4.85456   | 2.23496   | 7.47415   |
| ENSG00000219665 | ENSG00000219665 | CTD-2006C1.2  | 19:120984 | q1 | q2 | 4.038     | -10.814   | 0 | 0 yes     | 0.0427405 | 0.0311052 | 0.0543757  | 2.42335   | 0.738139  | 4.10857   |
| ENSG00000157510 | ENSG00000157510 | AFAP1L1       | 5:1485210 | q1 | q2 | 4.19      | -8.857    | 0 | 0 yes     | 0.0078254 | 0.0070775 | 0.00857317 | 0.516824  | 0.030277  | 1.00337   |
| ENSG00000155269 | ENSG00000155269 | GPR78         | 4:8560451 | q1 | q2 | 4.404     | -36.812   | 0 | 0 yes     | 0.0018481 | 0.0015288 | 0.00216736 | 0.151127  | 0.126112  | 0.176142  |
| ENSG00000222020 | ENSG00000222020 | AC062017.1    | 2:2399698 | q1 | q2 | 4.523     | -31.32    | 0 | 0 yes     | 0.364812  | 0.30345   | 0.426175   | 33.6094   | 25.7176   | 41.5011   |
| ENSG00000235374 | ENSG00000235374 | C21orf122     | 21:464916 | q1 | q2 | 4.523     | -13.296   | 0 | 0 yes     | 0.0085369 | 0.0079049 | 0.0091688  | 0.786386  | 0.254543  | 1.31823   |
| ENSG00000213641 | ENSG00000213641 | RP11-132J14.1 | 14:559659 | q1 | q2 | 5.031     | -10.589   | 0 | 0 yes     | 0.0053556 | 0.0051617 | 0.00554955 | 0.819855  | 0.0413656 | 1.59834   |
| ENSG00000241635 | ENSG00000241635 | UGT1A1        | 2:2345262 | q1 | q2 | 7.583     | -66.221   | 0 | 0 yes     | 0.002802  | 0.0025302 | 0.00307385 | 5.50214   | 4.36078   | 6.64351   |
| ENSG00000085563 | ENSG00000085563 | ABCB1         | 7:8713294 | q1 | q2 | 1.79769e+ | 1.79769e+ | 0 | 0.004 yes | 0         | 0         | 0          | 0.197667  | 0.086185  | 0.309148  |
| ENSG00000103832 | ENSG00000103832 | RP5-1086D14.1 | 15:308571 | q1 | q2 | 1.79769e+ | 1.79769e+ | 0 | 0 yes     | 0         | 0         | 0          | 0.058954  | 0.054507  | 0.0634009 |
| ENSG00000124693 | ENSG00000124693 | HIST1H3B      | 6:2602190 | q1 | q2 | 1.79769e+ | 1.79769e+ | 0 | 0 yes     | 0         | 0         | 0          | 0.108234  | 0.0572119 | 0.159256  |
| ENSG00000131435 | ENSG00000131435 | PDLIM4        | 5:1315205 | q1 | q2 | 1.79769e+ | 1.79769e+ | 0 | 0 yes     | 0         | 0         | 0          | 0.0751743 | 0.0711004 | 0.0792482 |
| ENSG00000134571 | ENSG00000134571 | MYBPC3        | 11:472907 | q1 | q2 | 1.79769e+ | 1.79769e+ | 0 | 0 yes     | 0         | 0         | 0          | 0.0277969 | 0.0266422 | 0.0289516 |
| ENSG00000147036 | ENSG00000147036 | LANCL3        | X:3720852 | q1 | q2 | 1.79769e+ | 1.79769e+ | 0 | 0 yes     | 0         | 0         | 0          | 0.0342695 | 0.0322294 | 0.0363095 |
| ENSG00000152580 | ENSG00000152580 | IGSF10        | 3:1508034 | q1 | q2 | 1.79769e+ | 1.79769e+ | 0 | 0 yes     | 0         | 0         | 0          | 2.41747   | 1.5936    | 3.24134   |
| ENSG00000163661 | ENSG00000163661 | PTX3          | 3:1568930 | q1 | q2 | 1.79769e+ | 1.79769e+ | 0 | 0 yes     | 0         | 0         | 0          | 0.0329672 | 0.0205067 | 0.0454276 |
| ENSG00000165182 | ENSG00000165182 | CXorf58       | X:2385146 | q1 | q2 | 1.79769e+ | 1.79769e+ | 0 | 0 yes     | 0         | 0         | 0          | 0.057168  | 0.0403911 | 0.073945  |
| ENSG00000167094 | ENSG00000167094 | TTC16         | 9:1303745 | q1 | q2 | 1.79769e+ | 1.79769e+ | 0 | 0 yes     | 0         | 0         | 0          | 0.0168734 | 0.0158601 | 0.0178868 |
| ENSG00000168386 | ENSG00000168386 | FILIP1L       | 3:9953667 | q1 | q2 | 1.79769e+ | 1.79769e+ | 0 | 0 yes     | 0         | 0         | 0          | 0.0462304 | 0.0372395 | 0.0552212 |
| ENSG00000173988 | ENSG00000173988 | LRRRC63       | 13:467860 | q1 | q2 | 1.79769e+ | 1.79769e+ | 0 | 0 yes     | 0         | 0         | 0          | 1.01536   | 0.524328  | 1.50639   |
| ENSG00000176029 | ENSG00000176029 | C11orf16      | 11:893268 | q1 | q2 | 1.79769e+ | 1.79769e+ | 0 | 0 yes     | 0         | 0         | 0          | 0.0325405 | 0.0235977 | 0.0414834 |
| ENSG00000176076 | ENSG00000176076 | KCNE1L        | X:1088669 | q1 | q2 | 1.79769e+ | 1.79769e+ | 0 | 0 yes     | 0         | 0         | 0          | 0.060796  | 0.0476844 | 0.0739077 |
| ENSG00000177725 | ENSG00000177725 | AC105206.1    | 8:2202224 | q1 | q2 | 1.79769e+ | 1.79769e+ | 0 | 0 yes     | 0         | 0         | 0          | 0.0083735 | 0.0073562 | 0.0093908 |
| ENSG00000178440 | ENSG00000178440 | RP11-324H6.6  | 10:513713 | q1 | q2 | 1.79769e+ | 1.79769e+ | 0 | 0 yes     | 0         | 0         | 0          | 12.3659   | 8.51555   | 16.2162   |
| ENSG00000183273 | ENSG00000183273 | CCDC60        | 12:119772 | q1 | q2 | 1.79769e+ | 1.79769e+ | 0 | 0 yes     | 0         | 0         | 0          | 0.0285123 | 0.0260211 | 0.0310035 |
| ENSG00000183395 | ENSG00000183395 | PMCH          | 12:102513 | q1 | q2 | 1.79769e+ | 1.79769e+ | 0 | 0 yes     | 0         | 0         | 0          | 0.0875544 | 0.0728596 | 0.102249  |
| ENSG00000184608 | ENSG00000184608 | C8orf12       | 8:1119714 | q1 | q2 | 1.79769e+ | 1.79769e+ | 0 | 0 yes     | 0         | 0         | 0          | 4.0335    | 2.53197   | 5.53503   |
| ENSG00000197882 | ENSG00000197882 | OR7E13P       | 11:865021 | q1 | q2 | 1.79769e+ | 1.79769e+ | 0 | 0 yes     | 0         | 0         | 0          | 0.142553  | 0.136699  | 0.148407  |
| ENSG00000199545 | ENSG00000199545 | 5S_rRNA       | 5:1382824 | q1 | q2 | 1.79769e+ | 1.79769e+ | 0 | 0 yes     | 0         | 0         | 0          | 15.7448   | 14.9644   | 16.5253   |
| ENSG00000200091 | ENSG00000200091 | 7SK           | 6:7631122 | q1 | q2 | 1.79769e+ | 1.79769e+ | 0 | 0 yes     | 0         | 0         | 0          | 0.7953    | 0.735181  | 0.855419  |
| ENSG00000200851 | ENSG00000200851 | SNORD27       | 11:626194 | q1 | q2 | 1.79769e+ | 1.79769e+ | 0 | 0 yes     | 0         | 0         | 0          | 113.686   | 102.721   | 124.65    |
| ENSG00000201207 | ENSG00000201207 | Y_RNA         | 6:3162900 | q1 | q2 | 1.79769e+ | 1.79769e+ | 0 | 0 yes     | 0         | 0         | 0          | 18.0368   | 17.3654   | 18.7081   |
| ENSG00000201448 | ENSG00000201448 | SNORA63       | 1:3688142 | q1 | q2 | 1.79769e+ | 1.79769e+ | 0 | 0 yes     | 0         | 0         | 0          | 9.1308    | 6.75334   | 11.5083   |
| ENSG00000201778 | ENSG00000201778 | Y_RNA         | 3:1568642 | q1 | q2 | 1.79769e+ | 1.79769e+ | 0 | 0 yes     | 0         | 0         | 0          | 24.8455   | 23.0323   | 26.6588   |
| ENSG00000202058 | ENSG00000202058 | 7SK           | 22:429496 | q1 | q2 | 1.79769e+ | 1.79769e+ | 0 | 0 yes     | 0         | 0         | 0          | 0.445664  | 0.277219  | 0.614109  |
| ENSG00000202314 | ENSG00000202314 | SNORD6        | 11:933948 | q1 | q2 | 1.79769e+ | 1.79769e+ | 0 | 0 yes     | 0         | 0         | 0          | 79.3626   | 72.6311   | 86.094    |
| ENSG00000202441 | ENSG00000202441 | RNY4P10       | 6:3316136 | q1 | q2 | 1.79769e+ | 1.79769e+ | 0 | 0 yes     | 0         | 0         | 0          | 0.764733  | 0.742707  | 0.786758  |
| ENSG00000203276 | ENSG00000203276 | AL353898.2    | 1:5449734 | q1 | q2 | 1.79769e+ | 1.79769e+ | 0 | 0 yes     | 0         | 0         | 0          | 0.0348014 | 0.0326036 | 0.0369991 |
| ENSG00000203301 | ENSG00000203301 | AL590822.1    | 1:1981908 | q1 | q2 | 1.79769e+ | 1.79769e+ | 0 | 0 yes     | 0         | 0         | 0          | 0.0170267 | 0.0159573 | 0.0180961 |
| ENSG00000207392 | ENSG00000207392 | SNORA20       | 6:1601000 | q1 | q2 | 1.79769e+ | 1.79769e+ | 0 | 0 yes     | 0         | 0         | 0          | 0.526316  | 0.500106  | 0.552526  |
| ENSG00000207437 | ENSG00000207437 | SNORD28       | 11:626194 | q1 | q2 | 1.79769e+ | 1.79769e+ | 0 | 0 yes     | 0         | 0         | 0          | 96.6995   | 87.373    | 106.026   |
| ENSG00000208892 | ENSG00000208892 | SNORA49       | 12:132434 | q1 | q2 | 1.79769e+ | 1.79769e+ | 0 | 0 yes     | 0         | 0         | 0          | 11.7163   | 11.1599   | 12.2726   |
| ENSG00000211535 | ENSG00000211535 | MIR711        | 3:4860150 | q1 | q2 | 1.79769e+ | 1.79769e+ | 0 | 0 yes     | 0         | 0         | 0          | 36.9303   | 31.1627   | 42.6978   |

|                 |                 |                |           |    |    |                    |   |           |   |   |   |           |           |           |
|-----------------|-----------------|----------------|-----------|----|----|--------------------|---|-----------|---|---|---|-----------|-----------|-----------|
| ENSG00000212125 | ENSG00000212125 | TAS2R15        | 12:109775 | q1 | q2 | 1.79769e+1.79769e+ | 0 | 0 yes     | 0 | 0 | 0 | 0.0522871 | 0.0431504 | 0.0614238 |
| ENSG00000213443 | ENSG00000213443 | NPM1P5         | 12:980627 | q1 | q2 | 1.79769e+1.79769e+ | 0 | 0 yes     | 0 | 0 | 0 | 0.0279169 | 0.0215123 | 0.0343215 |
| ENSG00000213484 | ENSG00000213484 | EIF4A1P8       | 10:938083 | q1 | q2 | 1.79769e+1.79769e+ | 0 | 0 yes     | 0 | 0 | 0 | 0.0696609 | 0.0582087 | 0.0811131 |
| ENSG00000213592 | ENSG00000213592 | AP000662.9     | 11:574800 | q1 | q2 | 1.79769e+1.79769e+ | 0 | 0 yes     | 0 | 0 | 0 | 0.0781918 | 0.0749246 | 0.081459  |
| ENSG00000214188 | ENSG00000214188 | ST7OT4         | 7:1165924 | q1 | q2 | 1.79769e+1.79769e+ | 0 | 0 yes     | 0 | 0 | 0 | 0.0296016 | 0.0261369 | 0.0330662 |
| ENSG00000215127 | ENSG00000215127 | RP11-35D5.1    | 4:6856699 | q1 | q2 | 1.79769e+1.79769e+ | 0 | 0 yes     | 0 | 0 | 0 | 0.0073672 | 0.0061393 | 0.0085951 |
| ENSG00000215208 | ENSG00000215208 | RP11-316O1.1   | 12:656724 | q1 | q2 | 1.79769e+1.79769e+ | 0 | 0 yes     | 0 | 0 | 0 | 0.0242847 | 0.0143705 | 0.0341989 |
| ENSG00000215297 | ENSG00000215297 | RP11-62E14.2   | 9:3218296 | q1 | q2 | 1.79769e+1.79769e+ | 0 | 0 yes     | 0 | 0 | 0 | 0.0607    | 0.0377576 | 0.0836425 |
| ENSG00000215791 | ENSG00000215791 | AL645728.2     | 1:1477052 | q1 | q2 | 1.79769e+1.79769e+ | 0 | 0 yes     | 0 | 0 | 0 | 3.48001   | 2.61589   | 4.34414   |
| ENSG00000216642 | ENSG00000216642 | RP1-95L4.3     | 6:1433816 | q1 | q2 | 1.79769e+1.79769e+ | 0 | 0 yes     | 0 | 0 | 0 | 0.309157  | 0.27582   | 0.342494  |
| ENSG00000219433 | ENSG00000219433 | RP11-350J20.4  | 6:1500454 | q1 | q2 | 1.79769e+1.79769e+ | 0 | 0 yes     | 0 | 0 | 0 | 0.0784738 | 0.0745316 | 0.082416  |
| ENSG00000221182 | ENSG00000221182 | SNORD98        | 10:704807 | q1 | q2 | 1.79769e+1.79769e+ | 0 | 0 yes     | 0 | 0 | 0 | 46.8607   | 43.9333   | 49.7881   |
| ENSG00000221267 | ENSG00000221267 | MIR1236        | 6:3191986 | q1 | q2 | 1.79769e+1.79769e+ | 0 | 0 yes     | 0 | 0 | 0 | 14.2076   | 13.6893   | 14.7259   |
| ENSG00000221420 | ENSG00000221420 | SNORA81        | 3:1865009 | q1 | q2 | 1.79769e+1.79769e+ | 0 | 0 yes     | 0 | 0 | 0 | 2.86714   | 2.67504   | 3.05925   |
| ENSG00000222345 | ENSG00000222345 | SNORD19        | 3:5252935 | q1 | q2 | 1.79769e+1.79769e+ | 0 | 0 yes     | 0 | 0 | 0 | 110.321   | 106.837   | 113.804   |
| ENSG00000222489 | ENSG00000222489 | SNORA79        | 14:207795 | q1 | q2 | 1.79769e+1.79769e+ | 0 | 0 yes     | 0 | 0 | 0 | 0.927389  | 0.745513  | 1.10926   |
| ENSG00000223505 | ENSG00000223505 | RP11-397P13.7  | 1:2037647 | q1 | q2 | 1.79769e+1.79769e+ | 0 | 0 yes     | 0 | 0 | 0 | 0.194362  | 0.179542  | 0.209182  |
| ENSG00000223916 | ENSG00000223916 | RP11-353H3.1   | 3:4332800 | q1 | q2 | 1.79769e+1.79769e+ | 0 | 0 yes     | 0 | 0 | 0 | 0.100165  | 0.0927608 | 0.10757   |
| ENSG00000223969 | ENSG00000223969 | AC002456.2     | 7:8996453 | q1 | q2 | 1.79769e+1.79769e+ | 0 | 0 yes     | 0 | 0 | 0 | 0.364801  | 0.339229  | 0.390374  |
| ENSG00000224011 | ENSG00000224011 | AC111155.1     | 17:587551 | q1 | q2 | 1.79769e+1.79769e+ | 0 | 0 yes     | 0 | 0 | 0 | 0.226652  | 0.221251  | 0.232053  |
| ENSG00000224020 | ENSG00000224020 | MIR181A2HG     | 9:1272798 | q1 | q2 | 1.79769e+1.79769e+ | 0 | 0 yes     | 0 | 0 | 0 | 0.104094  | 0.0782714 | 0.129916  |
| ENSG00000224315 | ENSG00000224315 | RP4-633I8.2    | 1:8412456 | q1 | q2 | 1.79769e+1.79769e+ | 0 | 0 yes     | 0 | 0 | 0 | 0.0809305 | 0.0772201 | 0.0846409 |
| ENSG00000224356 | ENSG00000224356 | RP11-151A6.4   | 13:101183 | q1 | q2 | 1.79769e+1.79769e+ | 0 | 0 yes     | 0 | 0 | 0 | 0.0757774 | 0.0485573 | 0.102997  |
| ENSG00000224401 | ENSG00000224401 | RPL7P57        | X:4769630 | q1 | q2 | 1.79769e+1.79769e+ | 0 | 0 yes     | 0 | 0 | 0 | 0.0708961 | 0.062907  | 0.0788852 |
| ENSG00000224502 | ENSG00000224502 | RP11-414H17.8  | 10:618688 | q1 | q2 | 1.79769e+1.79769e+ | 0 | 0 yes     | 0 | 0 | 0 | 0.335206  | 0.302648  | 0.367764  |
| ENSG00000224665 | ENSG00000224665 | RP11-197N18.2  | 12:123405 | q1 | q2 | 1.79769e+1.79769e+ | 0 | 0 yes     | 0 | 0 | 0 | 0.68054   | 0.45105   | 0.91003   |
| ENSG00000224675 | ENSG00000224675 | AC009227.2     | 2:1547284 | q1 | q2 | 1.79769e+1.79769e+ | 0 | 0 yes     | 0 | 0 | 0 | 0.0317107 | 0.0228299 | 0.0405915 |
| ENSG00000224884 | ENSG00000224884 | AC034187.2     | 3:7994491 | q1 | q2 | 1.79769e+1.79769e+ | 0 | 0 yes     | 0 | 0 | 0 | 0.0908641 | 0.0824367 | 0.0992915 |
| ENSG00000224892 | ENSG00000224892 | RPS4XP16       | 13:519099 | q1 | q2 | 1.79769e+1.79769e+ | 0 | 0 yes     | 0 | 0 | 0 | 0.0572138 | 0.0482235 | 0.0662041 |
| ENSG00000225251 | ENSG00000225251 | RP11-730A19.2  | 10:129386 | q1 | q2 | 1.79769e+1.79769e+ | 0 | 0 yes     | 0 | 0 | 0 | 0.0534545 | 0.0482989 | 0.0586101 |
| ENSG00000225408 | ENSG00000225408 | RP11-207C16.4  | 9:5629024 | q1 | q2 | 1.79769e+1.79769e+ | 0 | 0 yes     | 0 | 0 | 0 | 0.263439  | 0.248223  | 0.278655  |
| ENSG00000225611 | ENSG00000225611 | RP11-70C1.1    | 3:4273415 | q1 | q2 | 1.79769e+1.79769e+ | 0 | 0 yes     | 0 | 0 | 0 | 0.0336616 | 0.0209387 | 0.0463845 |
| ENSG00000225782 | ENSG00000225782 | RP11-322F10.2  | 1:2207015 | q1 | q2 | 1.79769e+1.79769e+ | 0 | 0 yes     | 0 | 0 | 0 | 0.0575351 | 0.0462516 | 0.0688187 |
| ENSG00000226769 | ENSG00000226769 | GAPDHP54       | 20:455232 | q1 | q2 | 1.79769e+1.79769e+ | 0 | 0 yes     | 0 | 0 | 0 | 0.0447208 | 0.0404471 | 0.0489945 |
| ENSG00000227056 | ENSG00000227056 | RP11-418J17.2  | 1:1195738 | q1 | q2 | 1.79769e+1.79769e+ | 0 | 0 yes     | 0 | 0 | 0 | 0.072108  | 0.0622264 | 0.0819895 |
| ENSG00000227694 | ENSG00000227694 | AC005884.1     | 17:587551 | q1 | q2 | 1.79769e+1.79769e+ | 0 | 0 yes     | 0 | 0 | 0 | 0.213773  | 0.208679  | 0.218867  |
| ENSG00000227848 | ENSG00000227848 | SUCLA2-AS1     | 13:485106 | q1 | q2 | 1.79769e+1.79769e+ | 0 | 0 yes     | 0 | 0 | 0 | 0.290449  | 0.240819  | 0.340078  |
| ENSG00000228063 | ENSG00000228063 | RP11-135J2.4   | 1:2192599 | q1 | q2 | 1.79769e+1.79769e+ | 0 | 0.002 yes | 0 | 0 | 0 | 2.76988   | 1.27856   | 4.26121   |
| ENSG00000228093 | ENSG00000228093 | AC005162.3     | 7:2903484 | q1 | q2 | 1.79769e+1.79769e+ | 0 | 0 yes     | 0 | 0 | 0 | 0.0539476 | 0.0396565 | 0.0682386 |
| ENSG00000228477 | ENSG00000228477 | RP3-342P20.2   | 1:4042080 | q1 | q2 | 1.79769e+1.79769e+ | 0 | 0 yes     | 0 | 0 | 0 | 0.0956921 | 0.0744272 | 0.116957  |
| ENSG00000228501 | ENSG00000228501 | RPL15P18       | 13:100741 | q1 | q2 | 1.79769e+1.79769e+ | 0 | 0 yes     | 0 | 0 | 0 | 0.230331  | 0.183797  | 0.276865  |
| ENSG00000228676 | ENSG00000228676 | AC069259.1     | 3:1717574 | q1 | q2 | 1.79769e+1.79769e+ | 0 | 0 yes     | 0 | 0 | 0 | 0.0595722 | 0.0523876 | 0.0667569 |
| ENSG00000228703 | ENSG00000228703 | RP5-1160K1.6   | 1:1101587 | q1 | q2 | 1.79769e+1.79769e+ | 0 | 0 yes     | 0 | 0 | 0 | 3.71391   | 1.92424   | 5.50359   |
| ENSG00000229628 | ENSG00000229628 | AC073115.7     | 7:4603050 | q1 | q2 | 1.79769e+1.79769e+ | 0 | 0.008 yes | 0 | 0 | 0 | 0.347845  | 0.138086  | 0.557603  |
| ENSG00000230005 | ENSG00000230005 | RP5-870F10.4   | 1:2279162 | q1 | q2 | 1.79769e+1.79769e+ | 0 | 0 yes     | 0 | 0 | 0 | 0.0547927 | 0.0516932 | 0.0578923 |
| ENSG00000230118 | ENSG00000230118 | AC092569.2     | 2:3094563 | q1 | q2 | 1.79769e+1.79769e+ | 0 | 0 yes     | 0 | 0 | 0 | 1.10354   | 0.568243  | 1.63883   |
| ENSG00000230424 | ENSG00000230424 | RP1-43E13.2    | 1:1953699 | q1 | q2 | 1.79769e+1.79769e+ | 0 | 0.003 yes | 0 | 0 | 0 | 4.61331   | 2.09545   | 7.13117   |
| ENSG00000230741 | ENSG00000230741 | SC22CB-1D7.1   | 22:335600 | q1 | q2 | 1.79769e+1.79769e+ | 0 | 0 yes     | 0 | 0 | 0 | 0.255544  | 0.242299  | 0.268789  |
| ENSG00000230753 | ENSG00000230753 | RP4-553F4.6    | 20:323167 | q1 | q2 | 1.79769e+1.79769e+ | 0 | 0 yes     | 0 | 0 | 0 | 0.0947133 | 0.0739183 | 0.115508  |
| ENSG00000230955 | ENSG00000230955 | RP11-109P14.10 | 1:3832636 | q1 | q2 | 1.79769e+1.79769e+ | 0 | 0 yes     | 0 | 0 | 0 | 0.258785  | 0.220629  | 0.296941  |

|                 |                 |                 |           |    |    |            |            |   |       |     |   |   |   |           |           |           |
|-----------------|-----------------|-----------------|-----------|----|----|------------|------------|---|-------|-----|---|---|---|-----------|-----------|-----------|
| ENSG00000231125 | ENSG00000231125 | AF129075.5      | 21:304281 | q1 | q2 | 1.79769e+1 | 1.79769e+1 | 0 | 0     | yes | 0 | 0 | 0 | 0.54685   | 0.479021  | 0.614678  |
| ENSG00000231563 | ENSG00000231563 | RP11-245P10.4   | 1:2285950 | q1 | q2 | 1.79769e+1 | 1.79769e+1 | 0 | 0     | yes | 0 | 0 | 0 | 0.307311  | 0.162443  | 0.452179  |
| ENSG00000231799 | ENSG00000231799 | RP13-93L13.2    | 9:9197570 | q1 | q2 | 1.79769e+1 | 1.79769e+1 | 0 | 0     | yes | 0 | 0 | 0 | 0.0388102 | 0.0354575 | 0.0421629 |
| ENSG00000231980 | ENSG00000231980 | AC011899.10     | 7:1573317 | q1 | q2 | 1.79769e+1 | 1.79769e+1 | 0 | 0     | yes | 0 | 0 | 0 | 0.0207197 | 0.0159025 | 0.025537  |
| ENSG00000232021 | ENSG00000232021 | RP11-558N14.1   | 4:1089687 | q1 | q2 | 1.79769e+1 | 1.79769e+1 | 0 | 0     | yes | 0 | 0 | 0 | 0.0426107 | 0.0244177 | 0.0608036 |
| ENSG00000232398 | ENSG00000232398 | TMPRSS11CP      | 4:6856699 | q1 | q2 | 1.79769e+1 | 1.79769e+1 | 0 | 0     | yes | 0 | 0 | 0 | 0.0332757 | 0.0277297 | 0.0388216 |
| ENSG00000232479 | ENSG00000232479 | AC010900.2      | 2:2037453 | q1 | q2 | 1.79769e+1 | 1.79769e+1 | 0 | 0     | yes | 0 | 0 | 0 | 0.031262  | 0.0267614 | 0.0357626 |
| ENSG00000232564 | ENSG00000232564 | RP4-591N18.2    | 22:408062 | q1 | q2 | 1.79769e+1 | 1.79769e+1 | 0 | 0     | yes | 0 | 0 | 0 | 0.0034625 | 0.0031814 | 0.0037435 |
| ENSG00000232633 | ENSG00000232633 | CTD-2201G3.1    | 5:1123577 | q1 | q2 | 1.79769e+1 | 1.79769e+1 | 0 | 0     | yes | 0 | 0 | 0 | 0.0059553 | 0.005225  | 0.0066856 |
| ENSG00000232682 | ENSG00000232682 | RP11-388P9.2    | 10:617881 | q1 | q2 | 1.79769e+1 | 1.79769e+1 | 0 | 0     | yes | 0 | 0 | 0 | 0.0696254 | 0.0640057 | 0.0752452 |
| ENSG00000232788 | ENSG00000232788 | AC078883.3      | 2:1732920 | q1 | q2 | 1.79769e+1 | 1.79769e+1 | 0 | 0     | yes | 0 | 0 | 0 | 0.159263  | 0.129394  | 0.189131  |
| ENSG00000233108 | ENSG00000233108 | AC006042.7      | 7:7676148 | q1 | q2 | 1.79769e+1 | 1.79769e+1 | 0 | 0     | yes | 0 | 0 | 0 | 0.135226  | 0.12523   | 0.145222  |
| ENSG00000233436 | ENSG00000233436 | BTBD18          | 11:574800 | q1 | q2 | 1.79769e+1 | 1.79769e+1 | 0 | 0     | yes | 0 | 0 | 0 | 0.0409761 | 0.0392639 | 0.0426883 |
| ENSG00000233509 | ENSG00000233509 | ZNF197-AS1      | 3:4459668 | q1 | q2 | 1.79769e+1 | 1.79769e+1 | 0 | 0     | yes | 0 | 0 | 0 | 0.119683  | 0.102883  | 0.136483  |
| ENSG00000233589 | ENSG00000233589 | RP4-694A7.2     | 1:6893983 | q1 | q2 | 1.79769e+1 | 1.79769e+1 | 0 | 0     | yes | 0 | 0 | 0 | 0.0641141 | 0.0398812 | 0.0883469 |
| ENSG00000233733 | ENSG00000233733 | H2AFZP6         | 22:317955 | q1 | q2 | 1.79769e+1 | 1.79769e+1 | 0 | 0     | yes | 0 | 0 | 0 | 0.0640848 | 0.0619578 | 0.0662118 |
| ENSG00000233789 | ENSG00000233789 | RP11-44D15.2    | 10:979514 | q1 | q2 | 1.79769e+1 | 1.79769e+1 | 0 | 0     | yes | 0 | 0 | 0 | 0.0547752 | 0.0332906 | 0.0762599 |
| ENSG00000234084 | ENSG00000234084 | RP3-388E23.2    | 6:1356046 | q1 | q2 | 1.79769e+1 | 1.79769e+1 | 0 | 0     | yes | 0 | 0 | 0 | 0.233023  | 0.196519  | 0.269526  |
| ENSG00000234185 | ENSG00000234185 | RP5-1132H15.1   | 7:6554078 | q1 | q2 | 1.79769e+1 | 1.79769e+1 | 0 | 0     | yes | 0 | 0 | 0 | 0.178863  | 0.169602  | 0.188124  |
| ENSG00000234233 | ENSG00000234233 | KCNH1-IT1       | 1:2108565 | q1 | q2 | 1.79769e+1 | 1.79769e+1 | 0 | 0     | yes | 0 | 0 | 0 | 0.126906  | 0.0862634 | 0.167548  |
| ENSG00000234740 | ENSG00000234740 | RP11-272P10.2   | 9:1310570 | q1 | q2 | 1.79769e+1 | 1.79769e+1 | 0 | 0     | yes | 0 | 0 | 0 | 0.32308   | 0.291846  | 0.354313  |
| ENSG00000234913 | ENSG00000234913 | XXbac-B476C20.1 | 22:182704 | q1 | q2 | 1.79769e+1 | 1.79769e+1 | 0 | 0     | yes | 0 | 0 | 0 | 0.0177054 | 0.0167002 | 0.0187106 |
| ENSG00000235267 | ENSG00000235267 | AC074117.13     | 2:2766523 | q1 | q2 | 1.79769e+1 | 1.79769e+1 | 0 | 0     | yes | 0 | 0 | 0 | 0.347427  | 0.321126  | 0.373728  |
| ENSG00000235586 | ENSG00000235586 | AC011247.3      | 2:3878911 | q1 | q2 | 1.79769e+1 | 1.79769e+1 | 0 | 0     | yes | 0 | 0 | 0 | 1.26492   | 1.15646   | 1.37339   |
| ENSG00000235848 | ENSG00000235848 | AC016689.1      | 2:3815032 | q1 | q2 | 1.79769e+1 | 1.79769e+1 | 0 | 0     | yes | 0 | 0 | 0 | 0.276224  | 0.252774  | 0.299674  |
| ENSG00000236842 | ENSG00000236842 | RP11-399K21.10  | 10:771903 | q1 | q2 | 1.79769e+1 | 1.79769e+1 | 0 | 0     | yes | 0 | 0 | 0 | 0.174538  | 0.109716  | 0.239359  |
| ENSG00000236869 | ENSG00000236869 | RP11-944L7.4    | 3:4459668 | q1 | q2 | 1.79769e+1 | 1.79769e+1 | 0 | 0     | yes | 0 | 0 | 0 | 0.241311  | 0.207437  | 0.275184  |
| ENSG00000236997 | ENSG00000236997 | RP5-934G17.2    | 1:1182184 | q1 | q2 | 1.79769e+1 | 1.79769e+1 | 0 | 0     | yes | 0 | 0 | 0 | 0.455473  | 0.420095  | 0.490851  |
| ENSG00000237259 | ENSG00000237259 | RP4-568F9.3     | 20:182691 | q1 | q2 | 1.79769e+1 | 1.79769e+1 | 0 | 0     | yes | 0 | 0 | 0 | 0.307611  | 0.249736  | 0.365487  |
| ENSG00000237263 | ENSG00000237263 | MAPK6PS3        | 13:426141 | q1 | q2 | 1.79769e+1 | 1.79769e+1 | 0 | 0     | yes | 0 | 0 | 0 | 0.0417547 | 0.0351936 | 0.0483158 |
| ENSG00000237827 | ENSG00000237827 | RP11-332O19.2   | 10:104845 | q1 | q2 | 1.79769e+1 | 1.79769e+1 | 0 | 0     | yes | 0 | 0 | 0 | 0.241104  | 0.22222   | 0.259989  |
| ENSG00000237953 | ENSG00000237953 | AC013267.1      | 2:2516650 | q1 | q2 | 1.79769e+1 | 1.79769e+1 | 0 | 0     | yes | 0 | 0 | 0 | 0.628773  | 0.500425  | 0.757121  |
| ENSG00000238278 | ENSG00000238278 | RP11-803B1.5    | 3:7546422 | q1 | q2 | 1.79769e+1 | 1.79769e+1 | 0 | 0.008 | yes | 0 | 0 | 0 | 0.118791  | 0.0471573 | 0.190425  |
| ENSG00000238650 | ENSG00000238650 | SNORD54         | 8:5697985 | q1 | q2 | 1.79769e+1 | 1.79769e+1 | 0 | 0     | yes | 0 | 0 | 0 | 38.6268   | 36.5606   | 40.6929   |
| ENSG00000238711 | ENSG00000238711 | RNY4P25         | 1:1513751 | q1 | q2 | 1.79769e+1 | 1.79769e+1 | 0 | 0     | yes | 0 | 0 | 0 | 22.2016   | 21.2298   | 23.1733   |
| ENSG00000238828 | ENSG00000238828 | hsa-mir-1974    | 5:1342405 | q1 | q2 | 1.79769e+1 | 1.79769e+1 | 0 | 0     | yes | 0 | 0 | 0 | 5105.05   | 3299.31   | 6910.79   |
| ENSG00000239607 | ENSG00000239607 | AC087651.1      | 17:730321 | q1 | q2 | 1.79769e+1 | 1.79769e+1 | 0 | 0     | yes | 0 | 0 | 0 | 1.8814    | 1.40353   | 2.35928   |
| ENSG00000239688 | ENSG00000239688 | AP000338.1      | 21:478788 | q1 | q2 | 1.79769e+1 | 1.79769e+1 | 0 | 0     | yes | 0 | 0 | 0 | 0.456502  | 0.43117   | 0.481834  |
| ENSG00000240005 | ENSG00000240005 | RP11-293A21.1   | 4:2685929 | q1 | q2 | 1.79769e+1 | 1.79769e+1 | 0 | 0     | yes | 0 | 0 | 0 | 0.443848  | 0.400789  | 0.486908  |
| ENSG00000240032 | ENSG00000240032 | RP11-274H2.3    | 3:1457818 | q1 | q2 | 1.79769e+1 | 1.79769e+1 | 0 | 0     | yes | 0 | 0 | 0 | 0.0887817 | 0.0795506 | 0.0980127 |
| ENSG00000240210 | ENSG00000240210 | RP11-204K16.1   | 14:682864 | q1 | q2 | 1.79769e+1 | 1.79769e+1 | 0 | 0     | yes | 0 | 0 | 0 | 8.07061   | 5.67415   | 10.4671   |
| ENSG00000240596 | ENSG00000240596 | KCNAB1-AS2      | 3:1557554 | q1 | q2 | 1.79769e+1 | 1.79769e+1 | 0 | 0     | yes | 0 | 0 | 0 | 0.28586   | 0.2284    | 0.34332   |
| ENSG00000240776 | ENSG00000240776 | RP11-435F17.1   | 3:1135470 | q1 | q2 | 1.79769e+1 | 1.79769e+1 | 0 | 0     | yes | 0 | 0 | 0 | 0.0996068 | 0.0802575 | 0.118956  |
| ENSG00000240848 | ENSG00000240848 | RP1-211D12.3    | 20:435951 | q1 | q2 | 1.79769e+1 | 1.79769e+1 | 0 | 0     | yes | 0 | 0 | 0 | 3.33148   | 2.29747   | 4.36548   |
| ENSG00000241499 | ENSG00000241499 | RP11-85G20.2    | 14:937038 | q1 | q2 | 1.79769e+1 | 1.79769e+1 | 0 | 0     | yes | 0 | 0 | 0 | 0.70182   | 0.65077   | 0.75287   |
| ENSG00000241830 | ENSG00000241830 | AC012640.1      | 5:1035381 | q1 | q2 | 1.79769e+1 | 1.79769e+1 | 0 | 0     | yes | 0 | 0 | 0 | 0.0715432 | 0.0670761 | 0.0760103 |
| ENSG00000242251 | ENSG00000242251 | AC005004.1      | 22:321499 | q1 | q2 | 1.79769e+1 | 1.79769e+1 | 0 | 0     | yes | 0 | 0 | 0 | 0.708996  | 0.627534  | 0.790457  |
| ENSG00000242683 | ENSG00000242683 | CTB-46B19.1     | 5:1382824 | q1 | q2 | 1.79769e+1 | 1.79769e+1 | 0 | 0     | yes | 0 | 0 | 0 | 0.0224788 | 0.0213645 | 0.023593  |
| ENSG00000242777 | ENSG00000242777 | AL590704.1      | 6:1446068 | q1 | q2 | 1.79769e+1 | 1.79769e+1 | 0 | 0     | yes | 0 | 0 | 0 | 6.9184    | 6.37939   | 7.4574    |
| ENSG00000242833 | ENSG00000242833 | AC100832.3      | 17:568332 | q1 | q2 | 1.79769e+1 | 1.79769e+1 | 0 | 0     | yes | 0 | 0 | 0 | 0.783262  | 0.768029  | 0.798494  |

|                 |                 |                  |           |    |    |                    |   |       |     |   |   |   |           |           |           |
|-----------------|-----------------|------------------|-----------|----|----|--------------------|---|-------|-----|---|---|---|-----------|-----------|-----------|
| ENSG00000242941 | ENSG00000242941 | CTD-2325P2.2     | 14:682864 | q1 | q2 | 1.79769e+1.79769e+ | 0 | 0     | yes | 0 | 0 | 0 | 0.156312  | 0.115612  | 0.197012  |
| ENSG00000243305 | ENSG00000243305 | RP11-362A9.3     | 3:1519616 | q1 | q2 | 1.79769e+1.79769e+ | 0 | 0     | yes | 0 | 0 | 0 | 0.100245  | 0.094572  | 0.105918  |
| ENSG00000243420 | ENSG00000243420 | AC011611.1       | 12:759569 | q1 | q2 | 1.79769e+1.79769e+ | 0 | 0     | yes | 0 | 0 | 0 | 0.952258  | 0.647291  | 1.25722   |
| ENSG00000243431 | ENSG00000243431 | RPL5P30          | 11:118307 | q1 | q2 | 1.79769e+1.79769e+ | 0 | 0     | yes | 0 | 0 | 0 | 0.0990896 | 0.0961704 | 0.102009  |
| ENSG00000243959 | ENSG00000243959 | AC091934.1       | 5:1759695 | q1 | q2 | 1.79769e+1.79769e+ | 0 | 0     | yes | 0 | 0 | 0 | 0.899148  | 0.841408  | 0.956888  |
| ENSG00000244134 | ENSG00000244134 | RPS12P20         | 11:723961 | q1 | q2 | 1.79769e+1.79769e+ | 0 | 0     | yes | 0 | 0 | 0 | 0.287338  | 0.281747  | 0.292929  |
| ENSG00000244158 | ENSG00000244158 | RP1-93H18.6      | 6:1167819 | q1 | q2 | 1.79769e+1.79769e+ | 0 | 0.003 | yes | 0 | 0 | 0 | 0.226546  | 0.100881  | 0.352211  |
| ENSG00000244266 | ENSG00000244266 | RP11-112N23.1    | 12:507200 | q1 | q2 | 1.79769e+1.79769e+ | 0 | 0     | yes | 0 | 0 | 0 | 0.300422  | 0.266886  | 0.333958  |
| ENSG00000244676 | ENSG00000244676 | AL109761.5       | 21:191356 | q1 | q2 | 1.79769e+1.79769e+ | 0 | 0     | yes | 0 | 0 | 0 | 13.5596   | 8.22367   | 18.8956   |
| ENSG00000244697 | ENSG00000244697 | RP11-378J18.5    | 1:2227914 | q1 | q2 | 1.79769e+1.79769e+ | 0 | 0     | yes | 0 | 0 | 0 | 0.0157497 | 0.0150186 | 0.0164809 |
| ENSG00000244741 | ENSG00000244741 | AC008670.5       | 5:1342405 | q1 | q2 | 1.79769e+1.79769e+ | 0 | 0     | yes | 0 | 0 | 0 | 4360.55   | 2642.7    | 6078.39   |
| ENSG00000247275 | ENSG00000247275 | AL160008.1       | 1:8947235 | q1 | q2 | 1.79769e+1.79769e+ | 0 | 0     | yes | 0 | 0 | 0 | 0.0599556 | 0.0412286 | 0.0786826 |
| ENSG00000248127 | ENSG00000248127 | CTC-235G5.3      | 5:7537777 | q1 | q2 | 1.79769e+1.79769e+ | 0 | 0     | yes | 0 | 0 | 0 | 0.174925  | 0.125936  | 0.223914  |
| ENSG00000248423 | ENSG00000248423 | RP11-235P11.1    | 8:1527472 | q1 | q2 | 1.79769e+1.79769e+ | 0 | 0     | yes | 0 | 0 | 0 | 0.0306276 | 0.0282923 | 0.032963  |
| ENSG00000248546 | ENSG00000248546 | ANP32C           | 4:1644454 | q1 | q2 | 1.79769e+1.79769e+ | 0 | 0     | yes | 0 | 0 | 0 | 0.0445444 | 0.0385106 | 0.0505783 |
| ENSG00000248772 | ENSG00000248772 | RP11-639F1.1     | 3:1550933 | q1 | q2 | 1.79769e+1.79769e+ | 0 | 0     | yes | 0 | 0 | 0 | 6.48609   | 5.11104   | 7.86113   |
| ENSG00000248785 | ENSG00000248785 | AC004067.4       | 4:1104813 | q1 | q2 | 1.79769e+1.79769e+ | 0 | 0     | yes | 0 | 0 | 0 | 0.559994  | 0.507831  | 0.612157  |
| ENSG00000248881 | ENSG00000248881 | CTC-366B18.2     | 5:7466431 | q1 | q2 | 1.79769e+1.79769e+ | 0 | 0     | yes | 0 | 0 | 0 | 4.46479   | 2.62356   | 6.30601   |
| ENSG00000249144 | ENSG00000249144 | RP1-117B12.2     | 17:484505 | q1 | q2 | 1.79769e+1.79769e+ | 0 | 0.001 | yes | 0 | 0 | 0 | 7.38464   | 3.62535   | 11.1439   |
| ENSG00000249249 | ENSG00000249249 | AC010226.4       | 5:1149143 | q1 | q2 | 1.79769e+1.79769e+ | 0 | 0     | yes | 0 | 0 | 0 | 0.0381475 | 0.0350756 | 0.0412193 |
| ENSG00000249417 | ENSG00000249417 | RP11-438D8.2     | 3:1409475 | q1 | q2 | 1.79769e+1.79769e+ | 0 | 0     | yes | 0 | 0 | 0 | 0.157466  | 0.140362  | 0.174571  |
| ENSG00000249494 | ENSG00000249494 | CTB-161M19.4     | 5:1183420 | q1 | q2 | 1.79769e+1.79769e+ | 0 | 0     | yes | 0 | 0 | 0 | 0.293461  | 0.266385  | 0.320537  |
| ENSG00000249540 | ENSG00000249540 | RP11-789L4.1     | 3:1409475 | q1 | q2 | 1.79769e+1.79769e+ | 0 | 0     | yes | 0 | 0 | 0 | 0.552145  | 0.492169  | 0.612122  |
| ENSG00000250073 | ENSG00000250073 | RP11-677M14.3    | 11:124609 | q1 | q2 | 1.79769e+1.79769e+ | 0 | 0     | yes | 0 | 0 | 0 | 0.0715792 | 0.060684  | 0.0824744 |
| ENSG00000250101 | ENSG00000250101 | RP11-1252I4.2    | 5:1772364 | q1 | q2 | 1.79769e+1.79769e+ | 0 | 0     | yes | 0 | 0 | 0 | 0.123515  | 0.0970309 | 0.15      |
| ENSG00000250328 | ENSG00000250328 | CTC-210G5.1      | 5:1216470 | q1 | q2 | 1.79769e+1.79769e+ | 0 | 0     | yes | 0 | 0 | 0 | 0.137662  | 0.111403  | 0.16392   |
| ENSG00000250641 | ENSG00000250641 | XXbac-BPG32J3.16 | 3:165472  | q1 | q2 | 1.79769e+1.79769e+ | 0 | 0     | yes | 0 | 0 | 0 | 0.0132871 | 0.0124455 | 0.0141287 |
| ENSG00000250659 | ENSG00000250659 | RP11-864I4.3     | 11:622010 | q1 | q2 | 1.79769e+1.79769e+ | 0 | 0     | yes | 0 | 0 | 0 | 0.24207   | 0.232719  | 0.25142   |
| ENSG00000250869 | ENSG00000250869 | RP11-453N18.1    | 8:6787633 | q1 | q2 | 1.79769e+1.79769e+ | 0 | 0     | yes | 0 | 0 | 0 | 0.0406274 | 0.0383077 | 0.042947  |
| ENSG00000251186 | ENSG00000251186 | RP11-689P11.3    | 4:8368438 | q1 | q2 | 1.79769e+1.79769e+ | 0 | 0     | yes | 0 | 0 | 0 | 0.15423   | 0.139372  | 0.169088  |
| ENSG00000251447 | ENSG00000251447 | RP11-517B11.6    | 3:1312523 | q1 | q2 | 1.79769e+1.79769e+ | 0 | 0     | yes | 0 | 0 | 0 | 16.0086   | 14.5622   | 17.455    |
| ENSG00000251821 | ENSG00000251821 | U6               | 4:1288020 | q1 | q2 | 1.79769e+1.79769e+ | 0 | 0     | yes | 0 | 0 | 0 | 15.3456   | 13.6612   | 17.03     |
| ENSG00000252304 | ENSG00000252304 | AP001781.1       | 11:111656 | q1 | q2 | 1.79769e+1.79769e+ | 0 | 0     | yes | 0 | 0 | 0 | 22.5664   | 19.4884   | 25.6444   |
| ENSG00000252412 | ENSG00000252412 | Y_RNA            | 22:374068 | q1 | q2 | 1.79769e+1.79769e+ | 0 | 0     | yes | 0 | 0 | 0 | 12.2797   | 11.4272   | 13.1322   |
| ENSG00000252564 | ENSG00000252564 | 5S_rRNA          | 2:1621645 | q1 | q2 | 1.79769e+1.79769e+ | 0 | 0     | yes | 0 | 0 | 0 | 23.08     | 21.5336   | 24.6264   |
| ENSG00000253384 | ENSG00000253384 | CTD-2547L16.3    | 8:1791393 | q1 | q2 | 1.79769e+1.79769e+ | 0 | 0     | yes | 0 | 0 | 0 | 0.0402212 | 0.0376786 | 0.0427637 |
| ENSG00000253536 | ENSG00000253536 | RP11-1174L13.2   | 5:7075144 | q1 | q2 | 1.79769e+1.79769e+ | 0 | 0     | yes | 0 | 0 | 0 | 0.0162079 | 0.0144042 | 0.0180115 |
| ENSG00000253720 | ENSG00000253720 | RP11-473O4.3     | 8:1308445 | q1 | q2 | 1.79769e+1.79769e+ | 0 | 0     | yes | 0 | 0 | 0 | 0.239696  | 0.214841  | 0.264552  |
| ENSG00000254732 | ENSG00000254732 | RP11-691N7.6     | 11:574800 | q1 | q2 | 1.79769e+1.79769e+ | 0 | 0     | yes | 0 | 0 | 0 | 0.143536  | 0.137538  | 0.149533  |
| ENSG00000255421 | ENSG00000255421 | CTD-2011F17.2    | 11:755144 | q1 | q2 | 1.79769e+1.79769e+ | 0 | 0     | yes | 0 | 0 | 0 | 0.12565   | 0.11324   | 0.138061  |
| ENSG00000255448 | ENSG00000255448 | RP1-59M18.2      | 11:178095 | q1 | q2 | 1.79769e+1.79769e+ | 0 | 0     | yes | 0 | 0 | 0 | 0.201051  | 0.173564  | 0.228538  |
| ENSG00000255730 | ENSG00000255730 | CTC-435M10.3     | 19:418368 | q1 | q2 | 1.79769e+1.79769e+ | 0 | 0     | yes | 0 | 0 | 0 | 5.07839   | 3.92024   | 6.23653   |
| ENSG00000256159 | ENSG00000256159 | RP11-820K3.4     | 12:315351 | q1 | q2 | 1.79769e+1.79769e+ | 0 | 0     | yes | 0 | 0 | 0 | 0.144323  | 0.0797796 | 0.208866  |
| ENSG00000256175 | ENSG00000256175 | RP11-377D9.2     | 12:130806 | q1 | q2 | 1.79769e+1.79769e+ | 0 | 0     | yes | 0 | 0 | 0 | 0.0278694 | 0.0258529 | 0.029886  |
| ENSG00000256185 | ENSG00000256185 | RP11-612B6.2     | 12:262729 | q1 | q2 | 1.79769e+1.79769e+ | 0 | 0     | yes | 0 | 0 | 0 | 1.64958   | 1.47642   | 1.82274   |
| ENSG00000256268 | ENSG00000256268 | RP11-221N13.3    | 12:656724 | q1 | q2 | 1.79769e+1.79769e+ | 0 | 0     | yes | 0 | 0 | 0 | 0.0814185 | 0.0481652 | 0.114672  |
| ENSG00000256326 | ENSG00000256326 | RP11-467L13.3    | 12:318000 | q1 | q2 | 1.79769e+1.79769e+ | 0 | 0     | yes | 0 | 0 | 0 | 0.257375  | 0.167768  | 0.346981  |
| ENSG00000256682 | ENSG00000256682 | TAS2R12          | 12:109775 | q1 | q2 | 1.79769e+1.79769e+ | 0 | 0     | yes | 0 | 0 | 0 | 0.0822529 | 0.06788   | 0.0966258 |
| ENSG00000256861 | ENSG00000256861 | RP11-512M8.5     | 12:122688 | q1 | q2 | 1.79769e+1.79769e+ | 0 | 0.002 | yes | 0 | 0 | 0 | 0.570437  | 0.263993  | 0.876881  |
| ENSG00000256885 | ENSG00000256885 | AP001877.1       | 11:955021 | q1 | q2 | 1.79769e+1.79769e+ | 0 | 0     | yes | 0 | 0 | 0 | 0.130862  | 0.112355  | 0.149369  |

|                 |                 |                |           |    |    |            |            |       |       |     |          |          |         |           |           |           |
|-----------------|-----------------|----------------|-----------|----|----|------------|------------|-------|-------|-----|----------|----------|---------|-----------|-----------|-----------|
| ENSG00000256967 | ENSG00000256967 | RP11-273B20.1  | 12:728167 | q1 | q2 | 1.79769e+1 | 1.79769e+1 | 0     | 0     | yes | 0        | 0        | 0       | 0.116146  | 0.100993  | 0.131299  |
| ENSG00000256973 | ENSG00000256973 | RP11-359J14.2  | 12:226015 | q1 | q2 | 1.79769e+1 | 1.79769e+1 | 0     | 0     | yes | 0        | 0        | 0       | 0.0724275 | 0.0648141 | 0.0800409 |
| ENSG00000257264 | ENSG00000257264 | RP11-719K4.5   | 16:147664 | q1 | q2 | 1.79769e+1 | 1.79769e+1 | 0     | 0     | yes | 0        | 0        | 0       | 0.0214009 | 0.0120608 | 0.030741  |
| ENSG00000257809 | ENSG00000257809 | RP11-603J24.14 | 12:565445 | q1 | q2 | 1.79769e+1 | 1.79769e+1 | 0     | 0.002 | yes | 0        | 0        | 0       | 4.30222   | 1.99248   | 6.61196   |
| ENSG00000257894 | ENSG00000257894 | RP1-78O14.1    | 12:792577 | q1 | q2 | 1.79769e+1 | 1.79769e+1 | 0     | 0     | yes | 0        | 0        | 0       | 0.0910434 | 0.0795    | 0.102587  |
| ENSG00000258064 | ENSG00000258064 | RP11-293I14.2  | 12:720032 | q1 | q2 | 1.79769e+1 | 1.79769e+1 | 0     | 0.001 | yes | 0        | 0        | 0       | 3.03563   | 1.54028   | 4.53099   |
| ENSG00000258088 | ENSG00000258088 | RP11-114H23.2  | 12:759569 | q1 | q2 | 1.79769e+1 | 1.79769e+1 | 0     | 0     | yes | 0        | 0        | 0       | 0.173636  | 0.118028  | 0.229244  |
| ENSG00000258212 | ENSG00000258212 | RP11-624G19.1  | 12:442297 | q1 | q2 | 1.79769e+1 | 1.79769e+1 | 0     | 0     | yes | 0        | 0        | 0       | 0.0288165 | 0.0198158 | 0.0378173 |
| ENSG00000258521 | ENSG00000258521 | RP11-638I2.9   | 14:100800 | q1 | q2 | 1.79769e+1 | 1.79769e+1 | 0     | 0     | yes | 0        | 0        | 0       | 0.014045  | 0.0134036 | 0.0146864 |
| ENSG00000258607 | ENSG00000258607 | RP11-701B16.3  | 14:598957 | q1 | q2 | 1.79769e+1 | 1.79769e+1 | 0     | 0     | yes | 0        | 0        | 0       | 0.202763  | 0.188108  | 0.217418  |
| ENSG00000258663 | ENSG00000258663 | RP11-123M6.2   | 14:101245 | q1 | q2 | 1.79769e+1 | 1.79769e+1 | 0     | 0     | yes | 0        | 0        | 0       | 0.334716  | 0.198069  | 0.471363  |
| ENSG00000259163 | ENSG00000259163 | RP11-1078H9.5  | 14:910069 | q1 | q2 | 1.79769e+1 | 1.79769e+1 | 0     | 0     | yes | 0        | 0        | 0       | 0.0453081 | 0.0410921 | 0.0495241 |
| ENSG00000178685 | ENSG00000178685 | PARP10         | 8:1450513 | q1 | q2 | 0.125      | -3.177     | 0.001 | 0.023 | yes | 224.396  | 211.961  | 236.831 | 254.238   | 240.068   | 268.408   |
| ENSG00000257755 | ENSG00000257755 | AC074032.1     | 12:505057 | q1 | q2 | 0.134      | -3.329     | 0.001 | 0.014 | yes | 0.298423 | 0.282075 | 0.31477 | 0.34119   | 0.321086  | 0.361295  |
| ENSG00000064787 | ENSG00000064787 | BCAS1          | 20:525533 | q1 | q2 | 0.141      | -3.355     | 0.001 | 0.013 | yes | 294.229  | 276.814  | 311.644 | 338.644   | 318.553   | 358.734   |
| ENSG00000143384 | ENSG00000143384 | MCL1           | 1:1505470 | q1 | q2 | 0.151      | -3.26      | 0.001 | 0.018 | yes | 228.819  | 213.931  | 243.707 | 266.016   | 248.557   | 283.475   |
| ENSG0000013810  | ENSG0000013810  | TACC3          | 4:1723226 | q1 | q2 | 0.161      | -3.438     | 0.001 | 0.01  | yes | 285.442  | 266.244  | 304.64  | 335.304   | 313.451   | 357.157   |
| ENSG00000115657 | ENSG00000115657 | ABCB6          | 2:2200744 | q1 | q2 | 0.167      | -3.38      | 0.001 | 0.012 | yes | 172.689  | 160.556  | 184.821 | 204.078   | 189.897   | 218.259   |
| ENSG00000244005 | ENSG00000244005 | NFS1           | 20:342139 | q1 | q2 | 0.174      | -3.266     | 0.001 | 0.017 | yes | 121.423  | 111.965  | 130.882 | 144.557   | 133.997   | 155.116   |
| ENSG00000166333 | ENSG00000166333 | ILK            | 11:662487 | q1 | q2 | 0.181      | -3.238     | 0.001 | 0.019 | yes | 126.573  | 117.032  | 136.114 | 151.726   | 139.167   | 164.286   |
| ENSG00000110108 | ENSG00000110108 | TMEM109        | 11:606806 | q1 | q2 | 0.184      | -3.193     | 0.001 | 0.022 | yes | 153.317  | 140.683  | 165.95  | 184.224   | 169.442   | 199.007   |
| ENSG00000136045 | ENSG00000136045 | PWP1           | 12:108079 | q1 | q2 | 0.193      | -3.295     | 0.001 | 0.016 | yes | 136.396  | 124.914  | 147.879 | 165.366   | 151.951   | 178.78    |
| ENSG00000149716 | ENSG00000149716 | ORAOV1         | 11:694558 | q1 | q2 | 0.197      | -3.472     | 0.001 | 0.009 | yes | 207.925  | 191.045  | 224.805 | 253.209   | 233.12    | 273.299   |
| ENSG00000113269 | ENSG00000113269 | RNF130         | 5:1793459 | q1 | q2 | 0.2        | -3.193     | 0.001 | 0.022 | yes | 129.465  | 118.046  | 140.885 | 158.135   | 144.067   | 172.204   |
| ENSG00000102893 | ENSG00000102893 | PHKB           | 16:474952 | q1 | q2 | 0.204      | -3.309     | 0.001 | 0.015 | yes | 16.8596  | 15.377   | 18.3421 | 20.6684   | 18.8872   | 22.4496   |
| ENSG00000187608 | ENSG00000187608 | ISG15          | 1:948802  | q1 | q2 | 0.205      | -3.252     | 0.001 | 0.018 | yes | 993.318  | 904.347  | 1082.29 | 1219.72   | 1111.14   | 1328.31   |
| ENSG00000210082 | ENSG00000210082 | J01415.4       | MT:1670-3 | q1 | q2 | 0.215      | -3.314     | 0.001 | 0.015 | yes | 1755.43  | 1595.18  | 1915.69 | 2176.43   | 1975.81   | 2377.06   |
| ENSG00000078140 | ENSG00000078140 | UBE2K          | 4:3969966 | q1 | q2 | 0.223      | -3.38      | 0.001 | 0.012 | yes | 147.402  | 133.808  | 160.996 | 184.174   | 166.839   | 201.509   |
| ENSG00000135709 | ENSG00000135709 | KIAA0513       | 16:850613 | q1 | q2 | 0.23       | -3.219     | 0.001 | 0.02  | yes | 23.688   | 21.2967  | 26.0792 | 29.8096   | 26.7984   | 32.8208   |
| ENSG00000113810 | ENSG00000113810 | SMC4           | 3:1599434 | q1 | q2 | 0.233      | -3.182     | 0.001 | 0.022 | yes | 68.1595  | 60.8818  | 75.4373 | 86.0234   | 77.4221   | 94.6247   |
| ENSG00000111237 | ENSG00000111237 | VPS29          | 12:110928 | q1 | q2 | 0.24       | -3.393     | 0.001 | 0.012 | yes | 144.674  | 129.893  | 159.455 | 183.844   | 165.918   | 201.77    |
| ENSG00000087470 | ENSG00000087470 | DNM1L          | 12:328321 | q1 | q2 | 0.254      | -3.201     | 0.001 | 0.021 | yes | 80.8205  | 71.8224  | 89.8187 | 104.231   | 92.4055   | 116.056   |
| ENSG00000091490 | ENSG00000091490 | SEL1L3         | 4:2574905 | q1 | q2 | 0.263      | -3.424     | 0.001 | 0.011 | yes | 65.8289  | 58.3744  | 73.2834 | 85.6334   | 76.745    | 94.5217   |
| ENSG00000116171 | ENSG00000116171 | SCP2           | 1:5339290 | q1 | q2 | 0.265      | -3.462     | 0.001 | 0.009 | yes | 57.5847  | 51.2407  | 63.9286 | 75.0789   | 67.0793   | 83.0785   |
| ENSG00000188313 | ENSG00000188313 | PLSCR1         | 3:1462329 | q1 | q2 | 0.269      | -3.247     | 0.001 | 0.018 | yes | 139.233  | 122.264  | 156.202 | 182.262   | 161.75    | 202.774   |
| ENSG00000197586 | ENSG00000197586 | ENTPD6         | 20:251763 | q1 | q2 | 0.269      | -3.28      | 0.001 | 0.017 | yes | 112.274  | 103.19   | 121.357 | 146.962   | 125.972   | 167.952   |
| ENSG00000084676 | ENSG00000084676 | NCOA1          | 2:2471478 | q1 | q2 | 0.272      | -3.396     | 0.001 | 0.012 | yes | 21.4335  | 19.5263  | 23.3408 | 28.1363   | 24.3859   | 31.8867   |
| ENSG00000102401 | ENSG00000102401 | ARMCX3         | X:1008779 | q1 | q2 | 0.275      | -3.41      | 0.001 | 0.011 | yes | 53.0341  | 46.8523  | 59.2159 | 69.7886   | 62.0348   | 77.5425   |
| ENSG00000163083 | ENSG00000163083 | INHBB          | 2:1211037 | q1 | q2 | 0.275      | -3.403     | 0.001 | 0.011 | yes | 28.7586  | 25.4083  | 32.109  | 37.8714   | 33.6203   | 42.1224   |
| ENSG00000064652 | ENSG00000064652 | SNX24          | 5:1221791 | q1 | q2 | 0.276      | -3.324     | 0.001 | 0.015 | yes | 176.224  | 155.264  | 197.184 | 232.321   | 205.332   | 259.309   |
| ENSG00000176715 | ENSG00000176715 | ACSF3          | 16:891547 | q1 | q2 | 0.276      | -3.427     | 0.001 | 0.011 | yes | 87.5129  | 78.5328  | 96.4929 | 115.325   | 101.01    | 129.639   |
| ENSG00000095002 | ENSG00000095002 | MSH2           | 2:4763010 | q1 | q2 | 0.283      | -3.479     | 0.001 | 0.009 | yes | 35.6669  | 31.8801  | 39.4537 | 47.3543   | 41.5017   | 53.2068   |
| ENSG00000196455 | ENSG00000196455 | PIK3R4         | 3:1303977 | q1 | q2 | 0.284      | -3.37      | 0.001 | 0.013 | yes | 61.9006  | 54.5689  | 69.2323 | 82.2019   | 72.3686   | 92.0351   |
| ENSG00000174013 | ENSG00000174013 | FBXO45         | 3:1962810 | q1 | q2 | 0.291      | -3.442     | 0.001 | 0.01  | yes | 10.5201  | 9.25054  | 11.7896 | 14.0714   | 12.4063   | 15.7364   |
| ENSG00000214753 | ENSG00000214753 | HNRNPUL2       | 11:624577 | q1 | q2 | 0.301      | -3.322     | 0.001 | 0.015 | yes | 45.3752  | 39.4713  | 51.2791 | 61.3393   | 53.5802   | 69.0984   |
| ENSG00000109180 | ENSG00000109180 | OCIAD1         | 4:4880722 | q1 | q2 | 0.309      | -3.332     | 0.001 | 0.014 | yes | 65.9231  | 57.926   | 73.9202 | 89.7808   | 77.194    | 102.368   |
| ENSG00000244580 | ENSG00000244580 | AL121959.1     | 6:1335617 | q1 | q2 | 0.309      | -3.317     | 0.001 | 0.015 | yes | 1076.11  | 930.479  | 1221.75 | 1466.26   | 1278.01   | 1654.51   |
| ENSG00000145494 | ENSG00000145494 | NDUFS6         | 5:1801513 | q1 | q2 | 0.31       | -3.353     | 0.001 | 0.013 | yes | 241.143  | 210.054  | 272.232 | 328.714   | 285.196   | 372.232   |
| ENSG00000134824 | ENSG00000134824 | FADS2          | 11:615670 | q1 | q2 | 0.313      | -3.363     | 0.001 | 0.013 | yes | 47.4931  | 41.3958  | 53.5904 | 64.9557   | 56.1956   | 73.7158   |
| ENSG00000171163 | ENSG00000171163 | ZNF692         | 1:2491442 | q1 | q2 | 0.315      | -3.409     | 0.001 | 0.011 | yes | 102.44   | 93.9129  | 110.966 | 140.347   | 117.205   | 163.489   |

|                 |                 |               |           |    |    |       |        |       |       |     |           |           |          |           |           |           |
|-----------------|-----------------|---------------|-----------|----|----|-------|--------|-------|-------|-----|-----------|-----------|----------|-----------|-----------|-----------|
| ENSG00000166997 | ENSG00000166997 | CNPY4         | 7:9969035 | q1 | q2 | 0.316 | -3.436 | 0.001 | 0.01  | yes | 29.4572   | 25.48     | 33.4343  | 40.4159   | 35.3578   | 45.4741   |
| ENSG00000172590 | ENSG00000172590 | MRPL52        | 14:232990 | q1 | q2 | 0.323 | -3.375 | 0.001 | 0.012 | yes | 471.286   | 405.117   | 537.455  | 651.091   | 566.303   | 735.879   |
| ENSG00000139719 | ENSG00000139719 | VPS33A        | 12:122688 | q1 | q2 | 0.33  | -3.238 | 0.001 | 0.019 | yes | 37.0257   | 31.4866   | 42.5648  | 51.4962   | 44.3713   | 58.6211   |
| ENSG00000253729 | ENSG00000253729 | PRKDC         | 8:4868566 | q1 | q2 | 0.331 | -3.444 | 0.001 | 0.01  | yes | 75.051    | 64.7528   | 85.3493  | 104.503   | 90.4319   | 118.575   |
| ENSG00000094880 | ENSG00000094880 | CDC23         | 5:1374754 | q1 | q2 | 0.335 | -3.384 | 0.001 | 0.012 | yes | 49.6849   | 42.4696   | 56.9003  | 69.4584   | 60.1107   | 78.8062   |
| ENSG00000093009 | ENSG00000093009 | CDC45         | 22:194669 | q1 | q2 | 0.354 | -3.216 | 0.001 | 0.02  | yes | 85.5283   | 70.3624   | 100.694  | 121.851   | 105.955   | 137.746   |
| ENSG00000059378 | ENSG00000059378 | PARP12        | 7:1397235 | q1 | q2 | 0.358 | -3.215 | 0.001 | 0.02  | yes | 62.8852   | 52.6466   | 73.1238  | 89.9415   | 76.2905   | 103.593   |
| ENSG00000111615 | ENSG00000111615 | KRR1          | 12:758744 | q1 | q2 | 0.365 | -3.29  | 0.001 | 0.016 | yes | 32.6967   | 26.9315   | 38.4619  | 47.0802   | 40.759    | 53.4014   |
| ENSG00000108671 | ENSG00000108671 | PSMD11        | 17:307483 | q1 | q2 | 0.369 | -3.358 | 0.001 | 0.013 | yes | 56.1784   | 49.0514   | 63.3053  | 81.2658   | 66.6711   | 95.8606   |
| ENSG00000196353 | ENSG00000196353 | CPNE4         | 3:1312523 | q1 | q2 | 0.379 | -3.276 | 0.001 | 0.017 | yes | 16.1883   | 13.2125   | 19.1641  | 23.6473   | 20.3251   | 26.9695   |
| ENSG00000250656 | ENSG00000250656 | RP11-453E17.2 | 4:6856699 | q1 | q2 | 0.383 | -3.274 | 0.001 | 0.017 | yes | 0.126267  | 0.105579  | 0.146955 | 0.185126  | 0.154272  | 0.21598   |
| ENSG00000115816 | ENSG00000115816 | CEBPZ         | 2:3739496 | q1 | q2 | 0.384 | -3.471 | 0.001 | 0.009 | yes | 18.4618   | 15.342    | 21.5815  | 27.102    | 23.2343   | 30.9698   |
| ENSG00000251705 | ENSG00000251705 | RN5-8S6       | Y:1003776 | q1 | q2 | 0.392 | -3.335 | 0.001 | 0.014 | yes | 1693.66   | 1400.52   | 1986.8   | 2505.71   | 2107.86   | 2903.56   |
| ENSG00000249242 | ENSG00000249242 | TMEM150C      | 4:8340574 | q1 | q2 | 0.395 | -3.216 | 0.001 | 0.02  | yes | 65.8773   | 53.9955   | 77.7591  | 97.778    | 81.4822   | 114.074   |
| ENSG00000049883 | ENSG00000049883 | PTCD2         | 5:7151523 | q1 | q2 | 0.405 | -3.309 | 0.001 | 0.015 | yes | 8.0977    | 6.61253   | 9.58286  | 12.1373   | 10.173    | 14.1016   |
| ENSG00000160087 | ENSG00000160087 | UBE2J2        | 1:1189288 | q1 | q2 | 0.438 | -3.323 | 0.001 | 0.015 | yes | 57.2018   | 47.7364   | 66.6672  | 88.596    | 70.4482   | 106.744   |
| ENSG00000130560 | ENSG00000130560 | UBAC1         | 9:1388248 | q1 | q2 | 0.439 | -3.189 | 0.001 | 0.022 | yes | 55.7344   | 49.6659   | 61.8029  | 86.4445   | 64.5889   | 108.3     |
| ENSG00000115977 | ENSG00000115977 | AAK1          | 2:6968641 | q1 | q2 | 0.455 | -3.349 | 0.001 | 0.014 | yes | 17.0627   | 13.6788   | 20.4465  | 26.9015   | 21.8992   | 31.9039   |
| ENSG00000252150 | ENSG00000252150 | AC092574.2    | 4:419223  | q1 | q2 | 0.455 | -3.263 | 0.001 | 0.018 | yes | 5.62089   | 4.52381   | 6.71798  | 8.85783   | 7.09506   | 10.6206   |
| ENSG00000142856 | ENSG00000142856 | ITGB3BP       | 1:6390644 | q1 | q2 | 0.461 | -3.471 | 0.001 | 0.009 | yes | 18.4647   | 14.5286   | 22.4008  | 29.2818   | 24.6382   | 33.9254   |
| ENSG00000088833 | ENSG00000088833 | NSFL1C        | 20:142280 | q1 | q2 | 0.465 | -3.314 | 0.001 | 0.015 | yes | 27.9695   | 24.8098   | 31.1292  | 44.5098   | 33.0862   | 55.9335   |
| ENSG00000243350 | ENSG00000243350 | RP11-379F12.3 | 10:809241 | q1 | q2 | 0.485 | -3.394 | 0.001 | 0.012 | yes | 19.0644   | 15.0189   | 23.1099  | 30.9607   | 25.038    | 36.8834   |
| ENSG00000174516 | ENSG00000174516 | PELI3         | 11:662342 | q1 | q2 | 0.489 | -3.321 | 0.001 | 0.015 | yes | 18.4362   | 14.6056   | 22.2668  | 30.0587   | 23.7888   | 36.3287   |
| ENSG00000185112 | ENSG00000185112 | FAM43A        | 3:1944066 | q1 | q2 | 0.492 | -3.266 | 0.001 | 0.017 | yes | 2.83444   | 2.19475   | 3.47413  | 4.63485   | 3.71107   | 5.55863   |
| ENSG00000233937 | ENSG00000233937 | CTC-338M12.4  | 5:1806639 | q1 | q2 | 0.497 | -3.391 | 0.001 | 0.012 | yes | 14.4399   | 11.1278   | 17.752   | 23.7372   | 19.4039   | 28.0705   |
| ENSG00000004399 | ENSG00000004399 | PLXND1        | 3:1292740 | q1 | q2 | 0.508 | -3.179 | 0.001 | 0.023 | yes | 32.299    | 25.8773   | 38.7207  | 53.7041   | 40.2448   | 67.1633   |
| ENSG00000215039 | ENSG00000215039 | AC005840.1    | 12:654816 | q1 | q2 | 0.535 | -3.343 | 0.001 | 0.014 | yes | 16.6664   | 12.3825   | 20.9503  | 28.4559   | 23.0317   | 33.8802   |
| ENSG00000112739 | ENSG00000112739 | PRPF4B        | 6:4021500 | q1 | q2 | 0.538 | -3.353 | 0.001 | 0.013 | yes | 9.88317   | 7.39999   | 12.3664  | 16.9245   | 13.5464   | 20.3027   |
| ENSG00000084112 | ENSG00000084112 | SSH1          | 12:109176 | q1 | q2 | 0.54  | -3.407 | 0.001 | 0.011 | yes | 20.2222   | 14.4498   | 25.9946  | 34.6987   | 29.9197   | 39.4778   |
| ENSG00000103550 | ENSG00000103550 | C16orf88      | 16:197176 | q1 | q2 | 0.543 | -3.386 | 0.001 | 0.012 | yes | 3.84481   | 2.91397   | 4.77565  | 6.61519   | 5.22614   | 8.00424   |
| ENSG00000255773 | ENSG00000255773 | RP11-566K11.1 | 16:899785 | q1 | q2 | 0.566 | -3.398 | 0.001 | 0.012 | yes | 2.61618   | 1.9544    | 3.27795  | 4.6087    | 3.60881   | 5.60859   |
| ENSG00000256929 | ENSG00000256929 | AC067852.1    | 17:406108 | q1 | q2 | 0.586 | -3.282 | 0.001 | 0.017 | yes | 38.524    | 27.9128   | 49.1351  | 69.2497   | 53.4821   | 85.0173   |
| ENSG00000109625 | ENSG00000109625 | CPZ           | 4:8560451 | q1 | q2 | 0.6   | -3.477 | 0.001 | 0.009 | yes | 6.25615   | 4.67544   | 7.83685  | 11.4043   | 8.71955   | 14.089    |
| ENSG00000147099 | ENSG00000147099 | HDAC8         | X:7154936 | q1 | q2 | 0.623 | -3.237 | 0.001 | 0.019 | yes | 11.4959   | 8.16216   | 14.8296  | 21.4428   | 16.0067   | 26.8789   |
| ENSG00000171723 | ENSG00000171723 | GPHN          | 14:666795 | q1 | q2 | 0.644 | -3.28  | 0.001 | 0.017 | yes | 27.8122   | 20.8328   | 34.7916  | 52.9341   | 36.9662   | 68.9021   |
| ENSG00000139350 | ENSG00000139350 | NEDD1         | 12:973010 | q1 | q2 | 0.649 | -3.474 | 0.001 | 0.009 | yes | 20.5732   | 15.777    | 25.3694  | 39.389    | 27.8762   | 50.9018   |
| ENSG00000224680 | ENSG00000224680 | PLA2G12AP1    | 1:5283434 | q1 | q2 | 0.661 | -3.455 | 0.001 | 0.01  | yes | 11.4744   | 8.01473   | 14.934   | 22.2267   | 16.9884   | 27.465    |
| ENSG00000092470 | ENSG00000092470 | WDR76         | 15:441191 | q1 | q2 | 0.667 | -3.214 | 0.001 | 0.02  | yes | 8.11013   | 5.4455    | 10.7747  | 15.8003   | 11.7939   | 19.8067   |
| ENSG00000204622 | ENSG00000204622 | HLA-J         | 6:2996878 | q1 | q2 | 0.671 | -3.307 | 0.001 | 0.015 | yes | 3.93271   | 2.6508    | 5.21462  | 7.69152   | 5.83425   | 9.54879   |
| ENSG00000245750 | ENSG00000245750 | AC100826.1    | 15:698540 | q1 | q2 | 0.672 | -3.337 | 0.001 | 0.014 | yes | 2.45635   | 1.66969   | 3.24301  | 4.81041   | 3.63528   | 5.98553   |
| ENSG00000258376 | ENSG00000258376 | RP4-647C14.2  | 14:737042 | q1 | q2 | 0.689 | -3.299 | 0.001 | 0.016 | yes | 0.0245322 | 0.0171355 | 0.031929 | 0.0488407 | 0.0347416 | 0.0629397 |
| ENSG00000134255 | ENSG00000134255 | CEPT1         | 1:1116599 | q1 | q2 | 0.705 | -3.308 | 0.001 | 0.015 | yes | 4.01862   | 2.71022   | 5.32702  | 8.13415   | 5.89506   | 10.3732   |
| ENSG00000182472 | ENSG00000182472 | CAPN12        | 19:391383 | q1 | q2 | 0.788 | -3.25  | 0.001 | 0.018 | yes | 0.827716  | 0.500487  | 1.15494  | 1.81952   | 1.30908   | 2.32995   |
| ENSG00000236646 | ENSG00000236646 | HBXIPP1       | 1:6220814 | q1 | q2 | 0.813 | -3.296 | 0.001 | 0.016 | yes | 30.5127   | 18.1919   | 42.8334  | 68.7749   | 49.3139   | 88.2359   |
| ENSG00000164180 | ENSG00000164180 | TMEM161B      | 5:8748544 | q1 | q2 | 0.842 | -3.3   | 0.001 | 0.016 | yes | 3.86704   | 2.13047   | 5.60361  | 8.97132   | 6.8022    | 11.1404   |
| ENSG00000136521 | ENSG00000136521 | NDUFB5        | 3:1793224 | q1 | q2 | 0.853 | -3.446 | 0.001 | 0.01  | yes | 88.9572   | 55.6625   | 122.252  | 208.759   | 141.121   | 276.397   |
| ENSG00000196085 | ENSG00000196085 | AC013442.1    | 2:3544444 | q1 | q2 | 0.886 | -3.363 | 0.001 | 0.013 | yes | 43.6628   | 24.6068   | 62.7189  | 105.866   | 74.6481   | 137.085   |
| ENSG00000148814 | ENSG00000148814 | LRRC27        | 10:134145 | q1 | q2 | 0.887 | -3.248 | 0.001 | 0.018 | yes | 1.90709   | 1.21051   | 2.60367  | 4.62778   | 2.75053   | 6.50504   |
| ENSG00000135926 | ENSG00000135926 | TMBIM1        | 2:2191351 | q1 | q2 | 0.966 | -3.477 | 0.001 | 0.009 | yes | 3.37497   | 1.57937   | 5.17058  | 8.8679    | 7.44772   | 10.2881   |
| ENSG00000099953 | ENSG00000099953 | MMP11         | 22:241052 | q1 | q2 | 1.013 | -3.234 | 0.001 | 0.019 | yes | 4.52318   | 1.98046   | 7.0659   | 12.454    | 9.01495   | 15.8931   |



|                 |                 |               |           |    |    |           |           |       |       |     |           |           |           |           |           |           |
|-----------------|-----------------|---------------|-----------|----|----|-----------|-----------|-------|-------|-----|-----------|-----------|-----------|-----------|-----------|-----------|
| ENSG00000132010 | ENSG00000132010 | ZNF20         | 19:122412 | q1 | q2 | 1.044     | -3.209    | 0.001 | 0.021 | yes | 3.0946    | 1.42254   | 4.76665   | 8.78705   | 5.60395   | 11.9701   |
| ENSG00000103021 | ENSG00000103021 | CCDC113       | 16:582838 | q1 | q2 | 1.161     | -3.353    | 0.001 | 0.013 | yes | 0.23963   | 0.1038    | 0.375461  | 0.765019  | 0.460883  | 1.06916   |
| ENSG00000240137 | ENSG00000240137 | RP11-103G8.2  | 3:1503776 | q1 | q2 | 1.196     | -3.345    | 0.001 | 0.014 | yes | 0.133186  | 0.0655928 | 0.200778  | 0.440454  | 0.218543  | 0.662364  |
| ENSG00000138100 | ENSG00000138100 | TRIM54        | 2:2750525 | q1 | q2 | 1.237     | -3.274    | 0.001 | 0.017 | yes | 0.0642617 | 0.0625838 | 0.0659396 | 0.221304  | 0.0542441 | 0.388364  |
| ENSG00000224985 | ENSG00000224985 | RP11-297K8.2  | 1:1611225 | q1 | q2 | 1.418     | -3.249    | 0.001 | 0.018 | yes | 3.5571    | 0.800354  | 6.31385   | 14.681    | 8.78875   | 20.5732   |
| ENSG00000131773 | ENSG00000131773 | KHDRBS3       | 8:1364696 | q1 | q2 | 1.439     | -3.459    | 0.001 | 0.01  | yes | 5.47737   | 3.38813   | 7.56661   | 23.1048   | 6.01121   | 40.1983   |
| ENSG00000134864 | ENSG00000134864 | A2LD1         | 13:101183 | q1 | q2 | 1.54      | -3.346    | 0.001 | 0.014 | yes | 3.50407   | 0.718161  | 6.28998   | 16.3507   | 8.76113   | 23.9402   |
| ENSG00000111752 | ENSG00000111752 | PHC1          | 12:906649 | q1 | q2 | 1.612     | -3.464    | 0.001 | 0.009 | yes | 0.323654  | 0.297687  | 0.349622  | 1.62279   | 0.117965  | 3.12761   |
| ENSG00000258660 | ENSG00000258660 | RP4-693M11.3  | 14:741115 | q1 | q2 | 1.74      | -3.334    | 0.001 | 0.014 | yes | 0.143284  | 0.113568  | 0.173     | 0.816034  | 0         | 1.65065   |
| ENSG00000185038 | ENSG00000185038 | HEATR7B1      | 2:2346843 | q1 | q2 | 1.751     | -3.423    | 0.001 | 0.011 | yes | 0.159657  | 0.0727153 | 0.2466    | 0.919875  | 0.123066  | 1.71668   |
| ENSG00000189410 | ENSG00000189410 | SH2D5         | 1:2104622 | q1 | q2 | 1.931     | -3.28     | 0.001 | 0.017 | yes | 1.49087   | 0         | 3.15306   | 10.282    | 6.38599   | 14.178    |
| ENSG00000248121 | ENSG00000248121 | AC005562.2    | 17:289035 | q1 | q2 | 2.15      | -3.225    | 0.001 | 0.02  | yes | 0.705975  | 0         | 1.52117   | 6.06079   | 2.02026   | 10.1013   |
| ENSG00000116652 | ENSG00000116652 | DLEU2L        | 1:6390644 | q1 | q2 | 2.346     | -3.47     | 0.001 | 0.009 | yes | 0.0614739 | 0.0554019 | 0.0675459 | 0.642154  | 0         | 1.50817   |
| ENSG00000202031 | ENSG00000202031 | SNORD38A      | 1:4520548 | q1 | q2 | 2.655     | -3.255    | 0.001 | 0.018 | yes | 16.9005   | 15.9587   | 17.8423   | 240.321   | 0         | 632.11    |
| ENSG00000243444 | ENSG00000243444 | PALM2         | 9:1124030 | q1 | q2 | 2.691     | -3.377    | 0.001 | 0.012 | yes | 0.124197  | 0         | 0.314199  | 1.83101   | 1.01313   | 2.64889   |
| ENSG00000224078 | ENSG00000224078 | UBE3A-AS1     | 15:250687 | q1 | q2 | 3.049     | -3.344    | 0.001 | 0.014 | yes | 0.0290516 | 0         | 0.0752956 | 0.61306   | 0.0670839 | 1.15904   |
| ENSG0000023171  | ENSG0000023171  | GRAMD1B       | 11:123396 | q1 | q2 | 3.23      | -3.323    | 0.001 | 0.015 | yes | 0.0654802 | 0         | 0.184322  | 1.65459   | 0.504372  | 2.8048    |
| ENSG00000156150 | ENSG00000156150 | ALX3          | 1:1105741 | q1 | q2 | 1.79769e+ | 1.79769e+ | 0.001 | 0.01  | yes | 0         | 0         | 0         | 0.705794  | 0.271581  | 1.14001   |
| ENSG00000168484 | ENSG00000168484 | SFTPC         | 8:2200433 | q1 | q2 | 1.79769e+ | 1.79769e+ | 0.001 | 0.013 | yes | 0         | 0         | 0         | 0.021238  | 0.0077774 | 0.0346987 |
| ENSG00000240801 | ENSG00000240801 | AC132217.4    | 11:215034 | q1 | q2 | 1.79769e+ | 1.79769e+ | 0.001 | 0.022 | yes | 0         | 0         | 0         | 5.45417   | 1.80116   | 9.10718   |
| ENSG00000242588 | ENSG00000242588 | RP11-274B21.1 | 7:1281737 | q1 | q2 | 1.79769e+ | 1.79769e+ | 0.001 | 0.013 | yes | 0         | 0         | 0         | 1.67118   | 0.614234  | 2.72813   |
| ENSG00000244684 | ENSG00000244684 | AL358786.1    | 9:7314994 | q1 | q2 | 1.79769e+ | 1.79769e+ | 0.001 | 0.013 | yes | 0         | 0         | 0         | 9.52941   | 3.50248   | 15.5563   |
| ENSG00000249199 | ENSG00000249199 | CTD-2139B15.5 | 5:1736933 | q1 | q2 | 1.79769e+ | 1.79769e+ | 0.001 | 0.021 | yes | 0         | 0         | 0         | 10.6399   | 3.54663   | 17.7331   |
| ENSG00000258227 | ENSG00000258227 | CLEC5A        | 7:1416076 | q1 | q2 | 1.79769e+ | 1.79769e+ | 0.001 | 0.021 | yes | 0         | 0         | 0         | 0.0452927 | 0.0150558 | 0.0755295 |
| ENSG00000259046 | ENSG00000259046 | RP11-857B24.2 | 14:453460 | q1 | q2 | 1.79769e+ | 1.79769e+ | 0.001 | 0.018 | yes | 0         | 0         | 0         | 3.44074   | 1.18732   | 5.69415   |
| ENSG00000143321 | ENSG00000143321 | HDGF          | 1:1567118 | q1 | q2 | 0.142     | -3.114    | 0.002 | 0.027 | yes | 272.167   | 254.492   | 289.842   | 313.813   | 293.606   | 334.02    |
| ENSG00000048828 | ENSG00000048828 | FAM120A       | 9:9620877 | q1 | q2 | 0.149     | -3.061    | 0.002 | 0.032 | yes | 116.273   | 108.296   | 124.25    | 134.921   | 125.632   | 144.21    |
| ENSG00000159176 | ENSG00000159176 | CSRP1         | 1:2014526 | q1 | q2 | 0.15      | -3.067    | 0.002 | 0.031 | yes | 396.123   | 370.637   | 421.61    | 460.004   | 426.31    | 493.698   |
| ENSG00000223501 | ENSG00000223501 | VPS52         | 6:3321731 | q1 | q2 | 0.153     | -3.131    | 0.002 | 0.026 | yes | 189.354   | 176.527   | 202.181   | 220.703   | 205.118   | 236.288   |
| ENSG00000129084 | ENSG00000129084 | PSMA1         | 11:144649 | q1 | q2 | 0.17      | -3.086    | 0.002 | 0.03  | yes | 147.99    | 136.407   | 159.572   | 175.413   | 161.807   | 189.019   |
| ENSG00000187741 | ENSG00000187741 | FANCA         | 16:897735 | q1 | q2 | 0.184     | -3.132    | 0.002 | 0.026 | yes | 63.0697   | 57.8647   | 68.2746   | 75.7828   | 69.4691   | 82.0965   |
| ENSG00000119723 | ENSG00000119723 | COQ6          | 14:743185 | q1 | q2 | 0.189     | -3.063    | 0.002 | 0.032 | yes | 111.589   | 101.137   | 122.04    | 134.773   | 123.972   | 145.574   |
| ENSG00000100811 | ENSG00000100811 | YY1           | 14:100657 | q1 | q2 | 0.192     | -3.064    | 0.002 | 0.032 | yes | 184.616   | 168.249   | 200.982   | 223.707   | 203.874   | 243.541   |
| ENSG00000140525 | ENSG00000140525 | FANCI         | 15:897871 | q1 | q2 | 0.192     | -3.04     | 0.002 | 0.034 | yes | 32.8374   | 29.8671   | 35.8077   | 39.7755   | 36.281    | 43.2701   |
| ENSG00000103018 | ENSG00000103018 | CY5B          | 16:694584 | q1 | q2 | 0.195     | -3.131    | 0.002 | 0.026 | yes | 46.4101   | 42.4256   | 50.3947   | 56.4001   | 51.3123   | 61.4879   |
| ENSG00000140943 | ENSG00000140943 | MBTPS1        | 16:840873 | q1 | q2 | 0.197     | -3.059    | 0.002 | 0.032 | yes | 89.686    | 81.4748   | 97.8972   | 109.229   | 99.323    | 119.134   |
| ENSG00000158089 | ENSG00000158089 | GALNT14       | 2:3113333 | q1 | q2 | 0.197     | -3.081    | 0.002 | 0.03  | yes | 81.0252   | 73.7966   | 88.2538   | 98.6571   | 89.6263   | 107.688   |
| ENSG00000136492 | ENSG00000136492 | BRIP1         | 17:597599 | q1 | q2 | 0.212     | -3.068    | 0.002 | 0.031 | yes | 47.9289   | 43.1959   | 52.6618   | 59.2755   | 53.5165   | 65.0344   |
| ENSG00000213780 | ENSG00000213780 | GTF2H4        | 6:3087596 | q1 | q2 | 0.227     | -3.082    | 0.002 | 0.03  | yes | 64.8203   | 57.3497   | 72.2909   | 81.3047   | 73.879    | 88.7304   |
| ENSG00000177119 | ENSG00000177119 | ANO6          | 12:455668 | q1 | q2 | 0.243     | -3.032    | 0.002 | 0.034 | yes | 9.61163   | 8.46557   | 10.7577   | 12.2563   | 10.9428   | 13.5698   |
| ENSG00000102024 | ENSG00000102024 | PLS3          | X:1147524 | q1 | q2 | 0.244     | -3.066    | 0.002 | 0.031 | yes | 110.237   | 100.822   | 119.652   | 140.691   | 121.806   | 159.576   |
| ENSG00000120533 | ENSG00000120533 | ENY2          | 8:1102531 | q1 | q2 | 0.259     | -3.169    | 0.002 | 0.023 | yes | 123.399   | 109.044   | 137.755   | 159.9     | 141.517   | 178.284   |
| ENSG00000197114 | ENSG00000197114 | ZGPAT         | 20:622891 | q1 | q2 | 0.26      | -3.056    | 0.002 | 0.032 | yes | 51.4699   | 45.3408   | 57.599    | 66.7558   | 58.64     | 74.8716   |
| ENSG00000179195 | ENSG00000179195 | ZNF664        | 12:124247 | q1 | q2 | 0.273     | -3.026    | 0.002 | 0.035 | yes | 174.561   | 152.214   | 196.909   | 229.408   | 200.191   | 258.625   |
| ENSG00000143164 | ENSG00000143164 | DCAF6         | 1:1678859 | q1 | q2 | 0.277     | -3.104    | 0.002 | 0.028 | yes | 38.3881   | 33.6964   | 43.0797   | 50.6358   | 44.0537   | 57.2179   |
| ENSG00000112305 | ENSG00000112305 | SMAP1         | 6:7137747 | q1 | q2 | 0.289     | -3.07     | 0.002 | 0.031 | yes | 23.6893   | 20.4453   | 26.9333   | 31.6185   | 27.5414   | 35.6956   |
| ENSG00000114383 | ENSG00000114383 | TUSC2         | 3:5035522 | q1 | q2 | 0.295     | -3.115    | 0.002 | 0.027 | yes | 52.3749   | 44.6459   | 60.1038   | 70.3575   | 61.9948   | 78.7202   |
| ENSG00000114302 | ENSG00000114302 | PRKAR2A       | 3:4878202 | q1 | q2 | 0.297     | -3.162    | 0.002 | 0.024 | yes | 39.8494   | 34.2344   | 45.4644   | 53.6449   | 46.9669   | 60.323    |
| ENSG00000185507 | ENSG00000185507 | IRF7          | 11:612552 | q1 | q2 | 0.297     | -3.088    | 0.002 | 0.03  | yes | 43.009    | 38.5002   | 47.5177   | 57.8852   | 48.5451   | 67.2253   |
| ENSG00000065150 | ENSG00000065150 | IPO5          | 13:986057 | q1 | q2 | 0.306     | -3.049    | 0.002 | 0.033 | yes | 92.0324   | 75.6076   | 108.457   | 125.032   | 113.472   | 136.591   |

|                 |                 |                |           |    |    |           |           |       |       |     |           |           |           |          |          |         |
|-----------------|-----------------|----------------|-----------|----|----|-----------|-----------|-------|-------|-----|-----------|-----------|-----------|----------|----------|---------|
| ENSG00000159079 | ENSG00000159079 | C21orf59       | 21:339488 | q1 | q2 | 0.31      | -3.128    | 0.002 | 0.026 | yes | 36.8183   | 32.1694   | 41.4672   | 50.2085  | 42.5302  | 57.8869 |
| ENSG00000078304 | ENSG00000078304 | PPP2R5C        | 14:102228 | q1 | q2 | 0.312     | -3.17     | 0.002 | 0.023 | yes | 88.8272   | 75.4468   | 102.208   | 121.343  | 105.978  | 136.709 |
| ENSG00000198894 | ENSG00000198894 | KIAA1737       | 14:775644 | q1 | q2 | 0.318     | -3.05     | 0.002 | 0.033 | yes | 28.5135   | 24.1684   | 32.8585   | 39.1956  | 33.6096  | 44.7817 |
| ENSG00000143499 | ENSG00000143499 | SMYD2          | 1:2144544 | q1 | q2 | 0.348     | -3.146    | 0.002 | 0.025 | yes | 26.9843   | 22.4332   | 31.5354   | 38.2199  | 32.7441  | 43.6956 |
| ENSG00000157800 | ENSG00000157800 | SLC37A3        | 7:1399934 | q1 | q2 | 0.356     | -3.147    | 0.002 | 0.025 | yes | 20.5889   | 17.2      | 23.9777   | 29.3848  | 24.8303  | 33.9393 |
| ENSG00000197989 | ENSG00000197989 | SNHG12         | 1:2887959 | q1 | q2 | 0.369     | -3.049    | 0.002 | 0.033 | yes | 29.9983   | 24.921    | 35.0755   | 43.4012  | 35.8799  | 50.9224 |
| ENSG00000120705 | ENSG00000120705 | ETF1           | 5:1378417 | q1 | q2 | 0.378     | -3.054    | 0.002 | 0.032 | yes | 28.4102   | 23.5853   | 33.2351   | 41.4408  | 33.9974  | 48.8841 |
| ENSG00000214167 | ENSG00000214167 | AC005544.1     | 17:649610 | q1 | q2 | 0.403     | -3.155    | 0.002 | 0.024 | yes | 32.6172   | 26.4604   | 38.774    | 48.7998  | 40.4041  | 57.1955 |
| ENSG00000121749 | ENSG00000121749 | TBC1D15        | 12:722334 | q1 | q2 | 0.428     | -3.049    | 0.002 | 0.033 | yes | 35.713    | 27.5301   | 43.896    | 54.8058  | 45.8977  | 63.7139 |
| ENSG00000155957 | ENSG00000155957 | TMBIM4         | 12:665168 | q1 | q2 | 0.442     | -3.15     | 0.002 | 0.025 | yes | 134.892   | 107.102   | 162.682   | 209.934  | 169.859  | 250.01  |
| ENSG00000152348 | ENSG00000152348 | ATG10          | 5:8126784 | q1 | q2 | 0.443     | -3.132    | 0.002 | 0.026 | yes | 20.3058   | 16.3403   | 24.2712   | 31.6351  | 25.1516  | 38.1186 |
| ENSG00000259141 | ENSG00000259141 | AC027323.1     | 5:8981142 | q1 | q2 | 0.451     | -3.069    | 0.002 | 0.031 | yes | 2.25978   | 1.76534   | 2.75422   | 3.54646  | 2.85175  | 4.24116 |
| ENSG00000180098 | ENSG00000180098 | TRNAU1AP       | 1:2887959 | q1 | q2 | 0.456     | -3.066    | 0.002 | 0.031 | yes | 14.6283   | 11.3715   | 17.8851   | 23.0783  | 18.527   | 27.6297 |
| ENSG00000129465 | ENSG00000129465 | RIPK3          | 14:247875 | q1 | q2 | 0.459     | -3.124    | 0.002 | 0.027 | yes | 14.0829   | 10.9622   | 17.2035   | 22.285   | 17.9861  | 26.584  |
| ENSG00000241404 | ENSG00000241404 | EGFL8          | 6:3211613 | q1 | q2 | 0.472     | -3.065    | 0.002 | 0.031 | yes | 19.3918   | 14.7643   | 24.0193   | 31.094   | 25.0338  | 37.1541 |
| ENSG00000073614 | ENSG00000073614 | KDM5A          | 12:389222 | q1 | q2 | 0.486     | -3.108    | 0.002 | 0.028 | yes | 18.9488   | 14.5525   | 23.345    | 30.8014  | 24.3476  | 37.2551 |
| ENSG00000132330 | ENSG00000132330 | SCLY           | 2:2388754 | q1 | q2 | 0.489     | -3.155    | 0.002 | 0.024 | yes | 14.1079   | 10.7553   | 17.4606   | 22.9958  | 18.4271  | 27.5646 |
| ENSG00000254452 | ENSG00000254452 | RP11-867G23.4  | 11:660360 | q1 | q2 | 0.521     | -3.136    | 0.002 | 0.026 | yes | 24.177    | 18.1259   | 30.228    | 40.7022  | 31.8142  | 49.5901 |
| ENSG00000150054 | ENSG00000150054 | MPP7           | 10:283399 | q1 | q2 | 0.563     | -3.068    | 0.002 | 0.031 | yes | 11.9966   | 8.0226    | 15.9707   | 21.0752  | 17.7298  | 24.4206 |
| ENSG00000233719 | ENSG00000233719 | GOT2P3         | 12:979439 | q1 | q2 | 0.65      | -3.145    | 0.002 | 0.025 | yes | 3.48861   | 2.34156   | 4.63565   | 6.67941  | 5.00956  | 8.34926 |
| ENSG00000113593 | ENSG00000113593 | PPWD1          | 5:6485906 | q1 | q2 | 0.667     | -3.172    | 0.002 | 0.023 | yes | 14.9605   | 11.1925   | 18.7286   | 29.1492  | 19.3328  | 38.9656 |
| ENSG00000119608 | ENSG00000119608 | PROX2          | 14:752300 | q1 | q2 | 0.681     | -3.043    | 0.002 | 0.033 | yes | 1.45748   | 0.940709  | 1.97426   | 2.87867  | 2.09364  | 3.6637  |
| ENSG00000163590 | ENSG00000163590 | PPM1L          | 3:1604733 | q1 | q2 | 0.774     | -3.121    | 0.002 | 0.027 | yes | 5.34438   | 2.84372   | 7.84505   | 11.5836  | 9.68874  | 13.4784 |
| ENSG00000058091 | ENSG00000058091 | CDK14          | 7:8996453 | q1 | q2 | 0.831     | -3.095    | 0.002 | 0.029 | yes | 6.90802   | 4.17692   | 9.63913   | 15.8541  | 10.0981  | 21.6101 |
| ENSG00000230530 | ENSG00000230530 | RP11-697K23.1  | 3:4559688 | q1 | q2 | 0.869     | -3.105    | 0.002 | 0.028 | yes | 2.05525   | 1.10269   | 3.00782   | 4.89924  | 3.36337  | 6.43511 |
| ENSG00000184304 | ENSG00000184304 | PRKD1          | 14:300456 | q1 | q2 | 0.906     | -3.078    | 0.002 | 0.03  | yes | 5.27695   | 2.83167   | 7.72222   | 13.0593  | 8.31711  | 17.8015 |
| ENSG00000239557 | ENSG00000239557 | RP11-168J18.6  | 3:5235033 | q1 | q2 | 0.912     | -3.056    | 0.002 | 0.032 | yes | 1.49152   | 0.750671  | 2.23236   | 3.71347  | 2.4836   | 4.94334 |
| ENSG00000108010 | ENSG00000108010 | GLRX3          | 10:131934 | q1 | q2 | 0.996     | -3.084    | 0.002 | 0.03  | yes | 16.3147   | 10.0659   | 22.5634   | 44.1889  | 21.1905  | 67.1874 |
| ENSG00000223960 | ENSG00000223960 | AC009948.5     | 2:1792786 | q1 | q2 | 1.012     | -3.125    | 0.002 | 0.027 | yes | 3.03556   | 1.39076   | 4.68035   | 8.35466  | 5.38761  | 11.3217 |
| ENSG00000247670 | ENSG00000247670 | AL078611.1     | 22:466399 | q1 | q2 | 1.038     | -3.07     | 0.002 | 0.031 | yes | 0.636324  | 0.271669  | 1.00098   | 1.79644  | 1.15182  | 2.44106 |
| ENSG00000236383 | ENSG00000236383 | AC109326.1     | 17:413638 | q1 | q2 | 1.076     | -3.035    | 0.002 | 0.034 | yes | 1.404     | 0.556098  | 2.2519    | 4.11615  | 2.58955  | 5.64275 |
| ENSG00000216895 | ENSG00000216895 | AC009403.2     | 7:1554039 | q1 | q2 | 1.131     | -3.052    | 0.002 | 0.033 | yes | 17.1885   | 6.55454   | 27.8225   | 53.2382  | 31.5421  | 74.9344 |
| ENSG00000232220 | ENSG00000232220 | AC008440.5     | 19:543578 | q1 | q2 | 1.145     | -3.155    | 0.002 | 0.024 | yes | 4.39759   | 1.65271   | 7.14246   | 13.82    | 8.70052  | 18.9394 |
| ENSG00000117122 | ENSG00000117122 | MFAP2          | 1:1730099 | q1 | q2 | 1.183     | -3.117    | 0.002 | 0.027 | yes | 1.98721   | 0.577358  | 3.39707   | 6.48855  | 4.73224  | 8.24485 |
| ENSG00000185513 | ENSG00000185513 | L3MBTL1        | 20:421363 | q1 | q2 | 1.196     | -3.142    | 0.002 | 0.025 | yes | 3.32315   | 1.1349    | 5.5114    | 10.9875  | 6.7937   | 15.1812 |
| ENSG00000258813 | ENSG00000258813 | RP11-109N23.4  | 14:735251 | q1 | q2 | 1.294     | -3.146    | 0.002 | 0.025 | yes | 2.49676   | 0.697396  | 4.29612   | 9.10969  | 5.49363  | 12.7257 |
| ENSG00000205794 | ENSG00000205794 | RP11-333E13.4  | 4:4004453 | q1 | q2 | 1.343     | -3.097    | 0.002 | 0.029 | yes | 0.91821   | 0.222576  | 1.61384   | 3.51685  | 2.03249  | 5.00121 |
| ENSG00000256309 | ENSG00000256309 | AC009469.1     | 2:2186645 | q1 | q2 | 1.531     | -3.102    | 0.002 | 0.028 | yes | 0.381027  | 0.0431749 | 0.718878  | 1.7617   | 0.99739  | 2.526   |
| ENSG00000255692 | ENSG00000255692 | RP1-127H14.3   | 12:120123 | q1 | q2 | 1.653     | -3.078    | 0.002 | 0.03  | yes | 0.280688  | 0.260951  | 0.300424  | 1.4658   | 0        | 3.03657 |
| ENSG00000246731 | ENSG00000246731 | CTD-2514K5.2   | 17:721997 | q1 | q2 | 1.688     | -3.078    | 0.002 | 0.03  | yes | 0.273244  | 0.0604651 | 0.486023  | 1.47799  | 0.336438 | 2.61955 |
| ENSG00000233611 | ENSG00000233611 | AC079135.1     | 2:2370738 | q1 | q2 | 1.696     | -3.166    | 0.002 | 0.024 | yes | 0.208531  | 0.146583  | 0.27048   | 1.13653  | 0        | 2.30613 |
| ENSG00000214846 | ENSG00000214846 | RP11-115L11.1  | 4:1560616 | q1 | q2 | 1.948     | -3.054    | 0.002 | 0.032 | yes | 0.0794909 | 0.0724922 | 0.0864897 | 0.557711 | 0        | 1.26749 |
| ENSG00000169282 | ENSG00000169282 | KCNAB1         | 3:1557554 | q1 | q2 | 2.253     | -3.095    | 0.002 | 0.029 | yes | 0.185751  | 0         | 0.450472  | 1.76764  | 1.23977  | 2.29552 |
| ENSG00000174093 | ENSG00000174093 | RP11-1407O15.2 | 17:363377 | q1 | q2 | 3.271     | -3.066    | 0.002 | 0.031 | yes | 0.0676498 | 0         | 0.208292  | 1.78251  | 0.922683 | 2.64233 |
| ENSG00000178550 | ENSG00000178550 | AC010170.1     | 3:4526595 | q1 | q2 | 3.448     | -3.106    | 0.002 | 0.028 | yes | 0.0217522 | 0         | 0.0652566 | 0.68391  | 0.024383 | 1.34344 |
| ENSG00000237669 | ENSG00000237669 | HCG4P3         | 6:2996878 | q1 | q2 | 1.79769e+ | 1.79769e+ | 0.002 | 0.031 | yes | 0         | 0         | 0         | 1.07356  | 0.320764 | 1.82636 |
| ENSG00000249055 | ENSG00000249055 | RP11-428B4.2   | 4:9979283 | q1 | q2 | 1.79769e+ | 1.79769e+ | 0.002 | 0.029 | yes | 0         | 0         | 0         | 7.70701  | 2.35337  | 13.0607 |
| ENSG00000255467 | ENSG00000255467 | RP11-144G7.2   | 11:107879 | q1 | q2 | 1.79769e+ | 1.79769e+ | 0.002 | 0.025 | yes | 0         | 0         | 0         | 1.19239  | 0.382536 | 2.00225 |
| ENSG00000181789 | ENSG00000181789 | COPG           | 3:1289684 | q1 | q2 | 0.139     | -2.968    | 0.003 | 0.042 | yes | 370.861   | 346.017   | 395.705   | 426.086  | 398.268  | 453.904 |
| ENSG00000007384 | ENSG00000007384 | RHBDP1         | 16:108057 | q1 | q2 | 0.163     | -3.023    | 0.003 | 0.035 | yes | 225.838   | 212.037   | 239.64    | 265.828  | 242.199  | 289.458 |

|                 |                 |                |           |    |    |           |           |           |           |     |           |           |           |          |           |          |
|-----------------|-----------------|----------------|-----------|----|----|-----------|-----------|-----------|-----------|-----|-----------|-----------|-----------|----------|-----------|----------|
| ENSG00000143878 | ENSG00000143878 | RHOB           | 2:2064683 | q1 | q2 | 0.187     | -2.997    | 0.003     | 0.038     | yes | 303.327   | 276.514   | 330.14    | 365.725  | 333.485   | 397.964  |
| ENSG0000024048  | ENSG0000024048  | UBR2           | 6:4253179 | q1 | q2 | 0.206     | -2.922    | 0.003     | 0.047     | yes | 14.0846   | 12.7468   | 15.4224   | 17.3006  | 15.5035   | 19.0977  |
| ENSG00000241343 | ENSG00000241343 | RPL36A         | X:1006458 | q1 | q2 | 0.22      | -2.965    | 0.003     | 0.042     | yes | 294.954   | 262.174   | 327.734   | 367.486  | 331.393   | 403.579  |
| ENSG00000131747 | ENSG00000131747 | TOP2A          | 17:385447 | q1 | q2 | 0.226     | -2.967    | 0.003     | 0.042     | yes | 35.6991   | 31.6903   | 39.7079   | 44.74    | 40.1469   | 49.3331  |
| ENSG00000053770 | ENSG00000053770 | MUDENG         | 14:576705 | q1 | q2 | 0.25      | -3        | 0.003     | 0.038     | yes | 42.9857   | 37.8569   | 48.1146   | 55.189   | 48.7733   | 61.6047  |
| ENSG00000119396 | ENSG00000119396 | RAB14          | 9:1239404 | q1 | q2 | 0.256     | -3.003    | 0.003     | 0.038     | yes | 39.3574   | 34.4667   | 44.2481   | 50.834   | 44.9053   | 56.7627  |
| ENSG00000168092 | ENSG00000168092 | PAFAH1B2       | 11:117014 | q1 | q2 | 0.332     | -2.921    | 0.003     | 0.047     | yes | 26.3637   | 21.5863   | 31.1411   | 36.7409  | 31.7021   | 41.7797  |
| ENSG00000168807 | ENSG00000168807 | SNTB2          | 16:692210 | q1 | q2 | 0.373     | -3.018    | 0.003     | 0.036     | yes | 96.1069   | 75.3998   | 116.814   | 139.49   | 122.678   | 156.303  |
| ENSG00000133111 | ENSG00000133111 | RFXAP          | 13:373933 | q1 | q2 | 0.383     | -3.003    | 0.003     | 0.038     | yes | 7.07051   | 5.74198   | 8.39905   | 10.3687  | 8.58191   | 12.1554  |
| ENSG00000126368 | ENSG00000126368 | NR1D1          | 17:382184 | q1 | q2 | 0.384     | -3.022    | 0.003     | 0.035     | yes | 5.84297   | 4.7486    | 6.93735   | 8.57788  | 7.10483   | 10.0509  |
| ENSG00000148634 | ENSG00000148634 | HERC4          | 10:696816 | q1 | q2 | 0.414     | -3.021    | 0.003     | 0.036     | yes | 7.80745   | 6.13902   | 9.47587   | 11.8123  | 9.78362   | 13.8409  |
| ENSG00000132849 | ENSG00000132849 | INADL          | 1:6220814 | q1 | q2 | 0.438     | -3.019    | 0.003     | 0.036     | yes | 16.6901   | 14.1424   | 19.2378   | 25.8532  | 19.4822   | 32.2242  |
| ENSG00000249042 | ENSG00000249042 | CTD-2015H6.3   | 5:7977811 | q1 | q2 | 0.458     | -2.95     | 0.003     | 0.044     | yes | 10.3083   | 7.86989   | 12.7467   | 16.2896  | 13.0211   | 19.558   |
| ENSG00000176208 | ENSG00000176208 | ATAD5          | 17:291589 | q1 | q2 | 0.502     | -2.953    | 0.003     | 0.043     | yes | 0.950534  | 0.707127  | 1.19394   | 1.56959  | 1.21917   | 1.92002  |
| ENSG00000151164 | ENSG00000151164 | RAD9B          | 12:110928 | q1 | q2 | 0.627     | -3.016    | 0.003     | 0.036     | yes | 6.08523   | 4.17806   | 7.9924    | 11.3935  | 8.27876   | 14.5082  |
| ENSG00000205268 | ENSG00000205268 | PDE7A          | 8:6655612 | q1 | q2 | 0.675     | -2.96     | 0.003     | 0.043     | yes | 3.13399   | 2.00863   | 4.25935   | 6.15482  | 4.42456   | 7.88507  |
| ENSG00000114786 | ENSG00000114786 | RP11-155D18.11 | 3:5198932 | q1 | q2 | 0.747     | -2.976    | 0.003     | 0.041     | yes | 2.27331   | 1.31773   | 3.22889   | 4.79643  | 3.48287   | 6.10999  |
| ENSG00000175455 | ENSG00000175455 | CCDC14         | 3:1236161 | q1 | q2 | 0.751     | -2.967    | 0.003     | 0.042     | yes | 30.0782   | 25.2979   | 34.8584   | 63.7198  | 33.1058   | 94.3338  |
| ENSG00000177721 | ENSG00000177721 | C5orf39        | 5:4301451 | q1 | q2 | 0.897     | -3.012    | 0.003     | 0.037     | yes | 0.763014  | 0.38594   | 1.14009   | 1.87035  | 1.24923   | 2.49147  |
| ENSG00000100154 | ENSG00000100154 | TTC28          | 22:282024 | q1 | q2 | 0.987     | -2.969    | 0.003     | 0.042     | yes | 1.51693   | 1.027     | 2.00687   | 4.07189  | 1.70372   | 6.44005  |
| ENSG00000258802 | ENSG00000258802 | RP11-589M4.2   | 14:532595 | q1 | q2 | 1.2       | -2.94     | 0.003     | 0.045     | yes | 57.6513   | 16.8857   | 98.417    | 191.443  | 113.286   | 269.599  |
| ENSG00000152457 | ENSG00000152457 | DCLRE1C        | 10:149208 | q1 | q2 | 1.306     | -2.962    | 0.003     | 0.042     | yes | 7.43593   | 3.00021   | 11.8717   | 27.4598  | 9.61687   | 45.3028  |
| ENSG00000254400 | ENSG00000254400 | RP11-732A19.8  | 11:662487 | q1 | q2 | 1.313     | -2.946    | 0.003     | 0.044     | yes | 3.13565   | 0.681133  | 5.59016   | 11.6618  | 6.68167   | 16.6419  |
| ENSG00000166670 | ENSG00000166670 | MMP10          | 11:102617 | q1 | q2 | 1.371     | -2.999    | 0.003     | 0.038     | yes | 0.0774686 | 0.0306329 | 0.124304  | 0.305297 | 0.0957519 | 0.514842 |
| ENSG00000147874 | ENSG00000147874 | HAUS6          | 9:1905314 | q1 | q2 | 1.374     | -2.945    | 0.003     | 0.044     | yes | 0.377423  | 0.170295  | 0.584552  | 1.4911   | 0.365717  | 2.61648  |
| ENSG00000163806 | ENSG00000163806 | SPDYA          | 2:2897450 | q1 | q2 | 1.642     | -2.952    | 0.003     | 0.043     | yes | 0.64241   | 0         | 1.29512   | 3.31683  | 1.81807   | 4.81559  |
| ENSG00000221817 | ENSG00000221817 | RP11-137L10.6  | 10:751961 | q1 | q2 | 1.703     | -2.944    | 0.003     | 0.044     | yes | 0.539028  | 0         | 1.11111   | 2.95909  | 1.59576   | 4.32242  |
| ENSG00000230534 | ENSG00000230534 | RP11-297A16.2  | 10:353869 | q1 | q2 | 2.148     | -2.995    | 0.003     | 0.038     | yes | 0.0762267 | 0.0643221 | 0.0881313 | 0.652893 | 0         | 1.58363  |
| ENSG00000258283 | ENSG00000258283 | RP11-386G11.3  | 12:493889 | q1 | q2 | 2.413     | -2.921    | 0.003     | 0.047     | yes | 0.164822  | 0.160483  | 0.169161  | 1.83978  | 0         | 4.87793  |
| ENSG00000213760 | ENSG00000213760 | ATP6V1G2       | 6:3149649 | q1 | q2 | 2.671     | -2.997    | 0.003     | 0.038     | yes | 0.130485  | 0         | 0.346486  | 1.88606  | 0.639198  | 3.13292  |
| ENSG00000100926 | ENSG00000100926 | TM9SF1         | 14:246583 | q1 | q2 | 0.137     | -2.913    | 0.004     | 0.048     | yes | 146.088   | 136.363   | 155.814   | 167.459  | 156.409   | 178.509  |
| ENSG00000151465 | ENSG00000151465 | CDC123         | 10:121716 | q1 | q2 | 0.226     | -2.907    | 0.004     | 0.049     | yes | 158.035   | 140.092   | 175.979   | 198.105  | 177.058   | 219.152  |
| ENSG00000006607 | ENSG00000006607 | FARP2          | 2:2422956 | q1 | q2 | 0.264     | -2.919    | 0.004     | 0.048     | yes | 77.2092   | 67.3943   | 87.0241   | 100.576  | 87.5961   | 113.556  |
| ENSG00000183773 | ENSG00000183773 | AIFM3          | 22:213193 | q1 | q2 | 0.355     | -2.918    | 0.004     | 0.048     | yes | 21.1133   | 17.6139   | 24.6128   | 30.1014  | 24.7474   | 35.4554  |
| ENSG00000115504 | ENSG00000115504 | EHBP1          | 2:6290098 | q1 | q2 | 0.441     | -2.918    | 0.004     | 0.048     | yes | 30.4733   | 24.4332   | 36.5134   | 47.384   | 36.5549   | 58.2131  |
| ENSG00000072121 | ENSG00000072121 | ZFYVE26        | 14:681686 | q1 | q2 | 0.582     | -2.916    | 0.004     | 0.048     | yes | 25.8896   | 17.3625   | 34.4168   | 46.3274  | 35.8857   | 56.7692  |
| ENSG00000137098 | ENSG00000137098 | SPAG8          | 9:3579215 | q1 | q2 | 0.709     | -2.913    | 0.004     | 0.048     | yes | 3.44314   | 2.24864   | 4.63764   | 6.99935  | 4.60659   | 9.3921   |
| ENSG00000229759 | ENSG00000229759 | MRPS18AP1      | 3:4828258 | q1 | q2 | 0.868     | -2.901    | 0.004     | 0.05      | yes | 3.99782   | 2.02004   | 5.9756    | 9.52725  | 6.31504   | 12.7395  |
| ENSG00000176533 | ENSG00000176533 | GNG7           | 19:251121 | q1 | q2 | 2.285     | -2.908    | 0.004     | 0.049     | yes | 0.0421936 | 0         | 0.105049  | 0.414573 | 0.207286  | 0.621859 |
| ENSG00000254872 | ENSG00000254872 | RP13-870H17.3  | 11:104987 | q1 | q2 | 2.742     | -2.911    | 0.004     | 0.049     | yes | 0.0644629 | 0         | 0.155627  | 1.00028  | 0         | 2.24472  |
| ENSG00000228275 | ENSG00000228275 | ARMCX3-AS1     | X:1008779 | q1 | q2 | 1.79769e+ | 1.79769e+ | 0.004     | 0.05      | yes | 0         | 0         | 0         | 2.60848  | 0.660104  | 4.55686  |
| ENSG00000227962 | ENSG00000227962 | RP11-382D8.3   | 1:2352944 | q1 | q2 | 1.79769e+ | 1.79769e+ | 8.6493300 | 9.6179000 | yes | 0         | 0         | 0         | 0.43591  | 0.412839  | 0.458981 |
