# Supplementary material for: Prosaposin activates the androgen receptor and potentiates resistance to endocrine treatment in breast cancer
Source: Springer Nature journal article supplement (doi:10.1186/s13058-015-0636-6), 2015-09-04
Supplement: MOESM5 [file 9781562]

| motif | gene            | start | stop | strand | p.value  | matched.sequence  |
|-------|-----------------|-------|------|--------|----------|-------------------|
| AR    | ENSG00000255958 | 28    | 42   | +      | 7.57E-07 | AAGAACAGAATGCTC   |
| AR    | ENSG00000168890 | 98    | 112  | -      | 1.09E-06 | AAGTACACAATGTAC   |
| AR    | ENSG00000100399 | 200   | 214  | -      | 2.29E-06 | AGGGACAGGCTGTCC   |
| AR    | ENSG00000221978 | 336   | 350  | -      | 2.56E-06 | GAGTACAGCCTGTCC   |
| AR    | ENSG00000175324 | 275   | 289  | -      | 3.02E-06 | AGGAACACGGTGTCT   |
| AR    | ENSG00000125148 | 321   | 335  | -      | 3.62E-06 | GAGGACACAGTGTAC   |
| AR    | ENSG00000254827 | 253   | 267  | +      | 5.00E-06 | GAGCACAGGATGTGC   |
| AR    | ENSG00000115977 | 52    | 66   | -      | 5.09E-06 | GGGAACACACTGTGA   |
| AR    | ENSG00000138495 | 231   | 245  | -      | 5.09E-06 | AAGTACAGGAAGTCC   |
| AR    | ENSG00000126217 | 9     | 23   | -      | 5.65E-06 | GGGAACAGCCTGCCC   |
| AR    | ENSG00000237669 | 296   | 310  | -      | 5.65E-06 | AGGCACAGACTGACC   |
| AR    | ENSG00000229628 | 320   | 334  | +      | 5.86E-06 | AAGCACAAACTGTAC   |
| AR    | ENSG00000251018 | 292   | 306  | -      | 6.54E-06 | AAGTACAGATAGTTC   |
| AR    | ENSG00000107371 | 284   | 298  | +      | 7.25E-06 | AGGTACACCGAGTCC   |
| AR    | ENSG00000184084 | 184   | 198  | +      | 7.89E-06 | AGGCACATAGAGTCC   |
| AR    | ENSG00000113269 | 218   | 232  | -      | 8.14E-06 | CGGAACACAAAGTCC   |
| AR    | ENSG00000104320 | 203   | 217  | -      | 9.02E-06 | GGGAACATCATGTTT   |
| AR    | ENSG00000225782 | 28    | 42   | +      | 9.61E-06 | GGGAACAAACTGAAC   |
| AR    | ENSG00000148737 | 175   | 189  | -      | 1.19E-05 | AGGAACACACTGCCT   |
| AR    | ENSG00000251357 | 88    | 102  | -      | 1.24E-05 | GAGAACACAGAGTGA   |
| AR    | ENSG00000163743 | 128   | 142  | +      | 1.26E-05 | AAGAACAGCAAGTAA   |
| AR    | ENSG00000207314 | 196   | 210  | +      | 1.31E-05 | CAGAACAGCATGTTT   |
| AR    | ENSG00000250174 | 252   | 266  | -      | 1.35E-05 | GAGAACAAGCTGACC   |
| AR    | ENSG00000237317 | 168   | 182  | -      | 1.41E-05 | TAGAACAGTCAGTGC   |
| AR    | ENSG00000166337 | 32    | 46   | -      | 1.41E-05 | GGGAACACAAAGTTA   |
| AR    | ENSG00000213641 | 27    | 41   | +      | 1.41E-05 | CAGTACACCATGTTC   |
| AR    | ENSG00000196353 | 283   | 297  | +      | 1.41E-05 | AAGAACATACTGACA   |
| AR    | ENSG00000050426 | 301   | 315  | +      | 1.48E-05 | AAGGACAGGGTGCCC   |
| AR    | ENSG00000138496 | 201   | 215  | -      | 1.48E-05 | AGGAACACGAAGCCC   |
| AR    | ENSG00000151150 | 246   | 260  | -      | 1.50E-05 | AGGAACACCAAGCGC   |
| AR    | ENSG00000204775 | 27    | 41   | -      | 1.54E-05 | GAGAACACCCAGCTC   |
| AR    | ENSG00000186298 | 237   | 251  | -      | 1.57E-05 | AAGAACAAAATGGCC   |
| AR    | ENSG00000110619 | 70    | 84   | -      | 1.69E-05 | CGGGACAGGGTGTGC   |
| AR    | ENSG00000079337 | 5     | 19   | -      | 1.69E-05 | AAGCACACCCTGTCT   |
| AR    | ENSG00000138100 | 232   | 246  | +      | 1.71E-05 | AGGGACAAACAGTGC   |
| AR    | ENSG00000230118 | 174   | 188  | +      | 1.74E-05 | AGGAACAGGCAGGCC   |
| AR    | ENSG00000227323 | 271   | 285  | -      | 1.74E-05 | AAGCACATTGTGTTT   |
| AR    | ENSG00000249967 | 375   | 389  | +      | 1.76E-05 | GGGAACACCCAGCTC   |
| AR    | ENSG00000107331 | 103   | 117  | -      | 1.79E-05 | GAGGACAGGCTGACC   |
| AR    | ENSG00000235267 | 159   | 173  | +      | 1.95E-05 | GAGAACACTIONTGCTC |
| AR    | ENSG00000012048 | 172   | 186  | -      | 1.98E-05 | AGGGACAGAAAGAGC   |
| AR    | ENSG00000198496 | 89    | 103  | +      | 1.98E-05 | AGGGACAGAAAGAGC   |
| AR    | ENSG00000168000 | 168   | 182  | -      | 2.03E-05 | AAGTACAGCGTGGCC   |
| AR    | ENSG00000254140 | 294   | 308  | +      | 2.06E-05 | AAGAACAGAGAGAAA   |
| AR    | ENSG00000248820 | 36    | 50   | +      | 2.15E-05 | AGGCACAGAAAGAAC   |
| AR    | ENSG00000163468 | 123   | 137  | +      | 2.17E-05 | AAGAACAGAGACTGC   |
| AR    | ENSG00000129484 | 184   | 198  | -      | 2.17E-05 | GGGAACACCCAGCGC   |
| AR    | ENSG00000175768 | 215   | 229  | +      | 2.17E-05 | GGGAACAGGAAGTGA   |
| AR    | ENSG00000150054 | 157   | 171  | +      | 2.23E-05 | AAGAACATTGAGTTC   |

|    |                 |     |       |          |                  |
|----|-----------------|-----|-------|----------|------------------|
| AR | ENSG00000257446 | 309 | 323 + | 2.30E-05 | GGGGACAGACTGTAA  |
| AR | ENSG00000221182 | 246 | 260 + | 2.49E-05 | TGGAACACAATGAAC  |
| AR | ENSG00000227328 | 44  | 58 -  | 2.49E-05 | GGGAACAATGTGCAC  |
| AR | ENSG00000247828 | 173 | 187 - | 2.55E-05 | AGGAACTTCCTGTCC  |
| AR | ENSG00000144118 | 384 | 398 - | 2.65E-05 | GAGTACATGCTGTGT  |
| AR | ENSG00000145494 | 363 | 377 + | 2.69E-05 | GGGTACAGGATGCAC  |
| AR | ENSG00000230005 | 145 | 159 - | 2.72E-05 | GGGAACATTATGGCC  |
| AR | ENSG00000231357 | 176 | 190 - | 2.72E-05 | GAGAACAGCATGAGA  |
| AR | ENSG00000133808 | 238 | 252 - | 2.76E-05 | CAGCACATCCTGTCC  |
| AR | ENSG00000236383 | 39  | 53 +  | 2.80E-05 | GGGGACAGACAGAGC  |
| AR | ENSG00000231951 | 362 | 376 - | 2.80E-05 | TAGAACAATATGTAC  |
| AR | ENSG00000249199 | 275 | 289 + | 2.87E-05 | AGGGACAGCCAGACC  |
| AR | ENSG00000155506 | 166 | 180 - | 2.91E-05 | AGGTACATCCAGATC  |
| AR | ENSG00000235092 | 231 | 245 + | 2.94E-05 | CAGTACAGTAAGTGC  |
| AR | ENSG00000224078 | 133 | 147 - | 3.01E-05 | GGGAACAAAAAGCTC  |
| AR | ENSG00000175455 | 234 | 248 + | 3.05E-05 | AAGAACAATCTTC    |
| AR | ENSG00000234324 | 262 | 276 + | 3.10E-05 | AGGGACACACAGTTA  |
| AR | ENSG00000196923 | 367 | 381 - | 3.14E-05 | AAGCACAGCCTGGAC  |
| AR | ENSG00000227638 | 41  | 55 +  | 3.18E-05 | AAGGACAGCTTGAGC  |
| AR | ENSG00000116299 | 314 | 328 - | 3.21E-05 | AAGAACACAGTGGAA  |
| AR | ENSG00000179902 | 252 | 266 + | 3.21E-05 | AAGAACACAGTGGAA  |
| AR | ENSG00000228021 | 334 | 348 - | 3.21E-05 | GGGTACAAAATGTTT  |
| AR | ENSG00000253518 | 106 | 120 - | 3.26E-05 | AAGAACACACTGGAA  |
| AR | ENSG00000258959 | 379 | 393 + | 3.34E-05 | GGGAACAAAATGGAC  |
| AR | ENSG00000244122 | 122 | 136 - | 3.38E-05 | AAGTACAGATAGAAC  |
| AR | ENSG00000232564 | 34  | 48 -  | 3.38E-05 | GGGCACACATAGTCC  |
| AR | ENSG00000217624 | 187 | 201 + | 3.38E-05 | GGGAACATCCAGTCA  |
| AR | ENSG00000259141 | 301 | 315 - | 3.38E-05 | GAGGACAAAGTGTTT  |
| AR | ENSG00000161179 | 352 | 366 - | 3.50E-05 | AGGGACACGCTGGTC  |
| AR | ENSG00000138641 | 245 | 259 + | 3.50E-05 | AAGTACATGAAGTTT  |
| AR | ENSG00000138794 | 64  | 78 -  | 3.77E-05 | GGGGACACACAGACC  |
| AR | ENSG00000059378 | 46  | 60 -  | 3.77E-05 | GGGAACAGTGTGGTT  |
| AR | ENSG00000141380 | 190 | 204 - | 3.81E-05 | AAGGACAAGGTGAAC  |
| AR | ENSG00000163900 | 98  | 112 + | 3.81E-05 | AAGGACAGAGAGGGC  |
| AR | ENSG00000256029 | 94  | 108 + | 3.85E-05 | GAGAACAGATTGAGA  |
| AR | ENSG00000061938 | 356 | 370 + | 3.85E-05 | AGGAACAGGGTGGGA  |
| AR | ENSG00000199916 | 237 | 251 - | 3.85E-05 | AGGAACAGAGTCCTC  |
| AR | ENSG00000231563 | 248 | 262 - | 3.90E-05 | TGGAACAGCATGCC   |
| AR | ENSG00000244604 | 268 | 282 - | 4.00E-05 | GGGCACAGTTAGTGC  |
| AR | ENSG00000160746 | 271 | 285 + | 4.00E-05 | GAGCACAGGTAGTAC  |
| AR | ENSG00000237806 | 312 | 326 - | 4.00E-05 | GAGCACAGGTTGATC  |
| AR | ENSG00000235423 | 285 | 299 - | 4.04E-05 | AAGAACACCATGGGT  |
| AR | ENSG00000258388 | 162 | 176 - | 4.04E-05 | CAGAACACGAAGTTT  |
| AR | ENSG00000090530 | 339 | 353 + | 4.09E-05 | AGGAACAGGAAGCCT  |
| AR | ENSG00000228477 | 278 | 292 + | 4.14E-05 | AAGGACATGAAGATC  |
| AR | ENSG00000234750 | 381 | 395 + | 4.14E-05 | AAGGACATGAAGATC  |
| AR | ENSG00000215450 | 386 | 400 + | 4.14E-05 | AAGGACATGAAGATC  |
| AR | ENSG00000135245 | 7   | 21 +  | 4.14E-05 | CAGAACACAATGACT  |
| AR | ENSG00000226769 | 375 | 389 + | 4.18E-05 | GAGAACAGAAAAGCTA |
| AR | ENSG00000147677 | 297 | 311 - | 4.23E-05 | AGGCACAGAGGGTCC  |

|    |                 |     |       |          |                 |
|----|-----------------|-----|-------|----------|-----------------|
| AR | ENSG00000235681 | 352 | 366 + | 4.28E-05 | AAGTACAGGGTGCAT |
| AR | ENSG00000240776 | 375 | 389 + | 4.33E-05 | AGGAACAGTTTGCCT |
| AR | ENSG00000249921 | 50  | 64 -  | 4.33E-05 | CAGAACAGGCAGTCA |
| AR | ENSG00000214593 | 361 | 375 + | 4.33E-05 | AGGAACAGTTTGCCT |
| AR | ENSG00000233436 | 375 | 389 + | 4.39E-05 | AGGCACTCACTGTGC |
| AR | ENSG00000257894 | 339 | 353 - | 4.54E-05 | AGGCACATGCAGAGC |
| AR | ENSG00000152465 | 288 | 302 + | 4.75E-05 | GAGGACAGCGAGTCT |
| AR | ENSG00000245148 | 197 | 211 - | 4.75E-05 | GAGGACACATTGCTC |
| AR | ENSG00000244266 | 321 | 335 + | 4.75E-05 | AAGTACAACATGTGA |
| AR | ENSG00000219433 | 304 | 318 + | 4.80E-05 | AAGAACAGAGTCTCA |
| AR | ENSG00000248423 | 341 | 355 + | 4.80E-05 | AAGAACAACAAGGTC |
| AR | ENSG00000227589 | 189 | 203 + | 4.86E-05 | AAGCACACTCAGCAC |
| AR | ENSG00000258136 | 86  | 100 - | 4.91E-05 | AAGCATCCAGTCT   |
| AR | ENSG00000171189 | 285 | 299 - | 4.91E-05 | GGGTACAGGGTGAGT |
| AR | ENSG00000224660 | 2   | 16 +  | 4.91E-05 | GAGAACTGAATGAAC |
| AR | ENSG00000169583 | 177 | 191 + | 4.91E-05 | CAGCACACTCAGTAC |
| AR | ENSG00000143627 | 114 | 128 + | 5.02E-05 | GGGGACAGGGTGGCC |
| AR | ENSG00000165238 | 189 | 203 - | 5.08E-05 | AAGGACACACAGGCC |
| AR | ENSG00000240682 | 253 | 267 - | 5.14E-05 | AGGGACAGGAAGTGA |
| AR | ENSG00000244580 | 146 | 160 + | 5.20E-05 | CAGAACAGCTTGCAC |
| AR | ENSG00000250328 | 78  | 92 +  | 5.26E-05 | AAGAACAGTATGATG |
| AR | ENSG00000256757 | 155 | 169 - | 5.31E-05 | CGGGACAGAATGCC  |
| AR | ENSG00000111331 | 9   | 23 -  | 5.31E-05 | GGGTACATACTGAGT |
| AR | ENSG00000137965 | 164 | 178 + | 5.37E-05 | GGGCACACTGAGTTT |
| AR | ENSG00000205424 | 260 | 274 + | 5.43E-05 | AGGCACACACAGGCC |
| AR | ENSG00000229674 | 209 | 223 - | 5.43E-05 | CAGAACATTTTGT   |
| AR | ENSG00000134825 | 212 | 226 + | 5.55E-05 | GAGAACAGAGTCTCT |
| AR | ENSG00000168496 | 341 | 355 - | 5.55E-05 | GAGAACAGAGTCTCT |
| AR | ENSG00000257077 | 281 | 295 + | 5.55E-05 | AGGAACAGTTTGTGG |
| AR | ENSG00000258790 | 306 | 320 - | 5.61E-05 | AGGTACAGGAAGGGC |
| AR | ENSG00000254633 | 350 | 364 - | 5.61E-05 | CAGCATGCAGTGC   |
| AR | ENSG00000256309 | 239 | 253 - | 6.19E-05 | CAGAACACCGTGATA |
| AR | ENSG0000010256  | 252 | 266 + | 6.25E-05 | GAGCATGGAGAGC   |
| AR | ENSG00000154783 | 376 | 390 - | 6.25E-05 | AGGTACACTGGCT   |
| AR | ENSG00000203301 | 220 | 234 - | 6.39E-05 | GGGGACATAGAGCC  |
| AR | ENSG00000185507 | 174 | 188 + | 6.39E-05 | AAGAACAGGCGGCGC |
| AR | ENSG00000197728 | 300 | 314 - | 6.39E-05 | TGGAACAAAGTGCAC |
| AR | ENSG00000133316 | 233 | 247 - | 6.45E-05 | AAGAACAGATACTAC |
| AR | ENSG00000167355 | 122 | 136 - | 6.45E-05 | GAGAACAGCATGGGA |
| AR | ENSG00000119640 | 358 | 372 - | 6.45E-05 | AGGCACAGCCAGGGC |
| AR | ENSG00000175892 | 40  | 54 +  | 6.52E-05 | GGGGACACTCTGGCC |
| AR | ENSG00000120306 | 143 | 157 - | 6.59E-05 | GGGGACAGAATCTTC |
| AR | ENSG00000166598 | 88  | 102 + | 6.73E-05 | AAGAACACGTTGCCA |
| AR | ENSG00000255478 | 336 | 350 - | 6.86E-05 | GAGAACATCCTGGCT |
| AR | ENSG00000184608 | 199 | 213 + | 6.86E-05 | CAGAACAGACTGGAT |
| AR | ENSG00000180815 | 195 | 209 + | 6.86E-05 | GGGCACATGGAGAGC |
| AR | ENSG00000134255 | 324 | 338 + | 7.00E-05 | GAGAACAGAAAGGTA |
| AR | ENSG00000189410 | 327 | 341 - | 7.15E-05 | GGGAACTGACAGATC |
| AR | ENSG00000233611 | 27  | 41 -  | 7.15E-05 | GGGGACATTCAGAGC |
| AR | ENSG00000126777 | 290 | 304 - | 7.30E-05 | AAGCACACTGAGGCC |

|    |                 |     |       |          |                  |
|----|-----------------|-----|-------|----------|------------------|
| AR | ENSG00000182472 | 90  | 104 - | 7.30E-05 | CGGAACAGCCGGTCC  |
| AR | ENSG00000249540 | 359 | 373 + | 7.30E-05 | AGGGACACTGTGAGA  |
| AR | ENSG00000053747 | 203 | 217 - | 7.37E-05 | AGGAACTGACAGCGC  |
| AR | ENSG00000138442 | 13  | 27 -  | 7.37E-05 | CGGCACACAATGTGA  |
| AR | ENSG00000152056 | 285 | 299 - | 7.37E-05 | AGGAACTCCCTGCGC  |
| AR | ENSG00000177731 | 27  | 41 +  | 7.52E-05 | AAGTACAGGCACTTC  |
| AR | ENSG00000226099 | 165 | 179 + | 7.52E-05 | AAGTACACAAAGAGA  |
| AR | ENSG00000259163 | 157 | 171 - | 7.59E-05 | CAGTACACAATGGCC  |
| AR | ENSG00000198400 | 33  | 47 -  | 7.67E-05 | GAGCACAGTGTGACA  |
| AR | ENSG00000120805 | 358 | 372 + | 7.67E-05 | GAGGACAGGGGGTTC  |
| AR | ENSG00000111291 | 64  | 78 -  | 7.91E-05 | AAGGACAGAAAGACA  |
| AR | ENSG00000078319 | 37  | 51 +  | 7.91E-05 | AAGTACAAAATGACA  |
| AR | ENSG00000189376 | 289 | 303 + | 7.91E-05 | GAGGACTCGGTGTTC  |
| AR | ENSG00000058091 | 73  | 87 -  | 7.98E-05 | GGGGACATGCTGGGC  |
| AR | ENSG00000251705 | 275 | 289 + | 7.98E-05 | CAGGACACATTGATC  |
| AR | ENSG00000230165 | 252 | 266 - | 8.06E-05 | AAGAACACCAAGGCT  |
| AR | ENSG00000243350 | 379 | 393 - | 8.14E-05 | GGGAACAATGTCTCC  |
| AR | ENSG00000110171 | 253 | 267 + | 8.14E-05 | AGGTACAGACGGTTT  |
| AR | ENSG00000173465 | 124 | 138 + | 8.14E-05 | GGGCACAGCGAGGTC  |
| AR | ENSG00000197381 | 13  | 27 +  | 8.14E-05 | TGGAACAGTCAGTAA  |
| AR | ENSG00000182199 | 36  | 50 +  | 8.21E-05 | GAGGACAATCTGTCA  |
| AR | ENSG00000174483 | 373 | 387 - | 8.37E-05 | GAGAACAGCAGGAGC  |
| AR | ENSG00000258588 | 266 | 280 - | 8.37E-05 | AGGAACAGAGCGCGC  |
| AR | ENSG00000127928 | 173 | 187 + | 8.37E-05 | GGGAACTCCCTGACC  |
| AR | ENSG00000023839 | 84  | 98 -  | 8.46E-05 | AGGGACAGGGGAGACT |
| AR | ENSG00000134571 | 51  | 65 +  | 8.54E-05 | AGGGACAATGTGGCC  |
| AR | ENSG00000249633 | 276 | 290 - | 8.71E-05 | AAGCACAGAGAGCCA  |
| AR | ENSG00000109971 | 186 | 200 + | 8.87E-05 | AAGAACACACTCGCC  |
| AR | ENSG00000103056 | 162 | 176 + | 8.87E-05 | AAGAACTATAAGTCC  |
| AR | ENSG00000253502 | 17  | 31 -  | 8.96E-05 | GAGCACATTAAGTAT  |
| AR | ENSG00000144504 | 88  | 102 - | 9.05E-05 | CGGGACAGCATGTCA  |
| AR | ENSG00000232830 | 310 | 324 + | 9.05E-05 | GAGGACAGCCAGGCC  |
| AR | ENSG00000196085 | 276 | 290 + | 9.22E-05 | AAGGACATGCAGGGC  |
| AR | ENSG00000243431 | 64  | 78 +  | 9.40E-05 | AAGTACAGAGTGCTG  |
| AR | ENSG00000112576 | 11  | 25 -  | 9.48E-05 | CAGAACAAGATGGCC  |
| AR | ENSG00000196372 | 11  | 25 +  | 9.57E-05 | AAGCACACACACTCC  |
| AR | ENSG00000213707 | 108 | 122 + | 9.57E-05 | CAGTACACTGAGCTC  |
| AR | ENSG00000071082 | 169 | 183 - | 9.66E-05 | GGGAACTGCGTGTCA  |
| AR | ENSG00000223960 | 369 | 383 + | 9.66E-05 | CAGTACAGTAAGTAT  |
| AR | ENSG00000111817 | 192 | 206 + | 9.66E-05 | GAGAACTCTCTGCGC  |
| AR | ENSG00000204977 | 168 | 182 - | 9.85E-05 | CAGAACACGCTGTAG  |
| AR | ENSG00000251154 | 309 | 323 + | 9.85E-05 | AGGAACAATCAGAAA  |
| AR | ENSG00000226746 | 313 | 327 - | 1.00E-04 | CAGGACAGCGTGGGC  |
| AR | ENSG00000258509 | 261 | 275 + | 0.000101 | GGGGACTCCGTGTGC  |
| AR | ENSG00000170289 | 294 | 308 + | 0.000101 | GAGAACAATGAGAAT  |
| AR | ENSG00000135916 | 53  | 67 +  | 0.000102 | GGGGACAGGTAGAGC  |
| AR | ENSG00000198894 | 248 | 262 + | 0.000105 | GAGAACAGCGTGCGG  |
| AR | ENSG00000256566 | 4   | 18 +  | 0.000106 | GGGGACAGAGACTTC  |
| AR | ENSG00000157800 | 335 | 349 + | 0.000106 | AGGCACAGGCAGCGT  |
| AR | ENSG00000225505 | 165 | 179 + | 0.000107 | AAGAACAATTTGAAA  |

|    |                 |     |       |          |                 |
|----|-----------------|-----|-------|----------|-----------------|
| AR | ENSG00000116455 | 25  | 39 +  | 0.000108 | CGGGACAGCATGGTC |
| AR | ENSG00000067182 | 206 | 220 - | 0.00011  | CGGGACAGGAAGAGC |
| AR | ENSG00000103023 | 353 | 367 + | 0.000111 | TGGAACATGGTGACT |
| AR | ENSG00000256142 | 126 | 140 - | 0.000112 | GGGAACAAAAAGAAA |
| AR | ENSG00000131469 | 42  | 56 -  | 0.000112 | GGGAACACAATCTGA |
| AR | ENSG00000256682 | 310 | 324 + | 0.000113 | AGGAACTGAAAGGTC |
| AR | ENSG00000129226 | 300 | 314 + | 0.000113 | CAGTACAGGAAGTGA |
| AR | ENSG00000220739 | 96  | 110 + | 0.000113 | AGGAACTCTAAGTTT |
| AR | ENSG00000106682 | 57  | 71 +  | 0.000115 | CAGCACATAATGGGC |
| AR | ENSG00000239775 | 147 | 161 - | 0.000115 | GGGAACAGCCTGCGG |
| AR | ENSG00000215208 | 343 | 357 - | 0.000116 | CAGGACATGGAGATC |
| AR | ENSG00000115541 | 208 | 222 - | 0.000116 | TAGCACACCCTGCGC |
| AR | ENSG00000240596 | 261 | 275 + | 0.000116 | AAGCACAGTTTGCCT |
| AR | ENSG00000229780 | 60  | 74 -  | 0.000117 | AGGAACAGTTGGAGC |
| AR | ENSG00000247372 | 52  | 66 +  | 0.000117 | AAGAACAGGCACCGC |
| AR | ENSG00000258974 | 232 | 246 - | 0.000117 | GAGTACTGAATGTCT |
| AR | ENSG00000230753 | 237 | 251 + | 0.000118 | CAGAACAGTAAGAGA |
| AR | ENSG00000106336 | 161 | 175 + | 0.000118 | GGGCACAGGATGTGG |
| AR | ENSG00000180398 | 103 | 117 + | 0.000119 | AAGGACACAGAGCAA |
| AR | ENSG00000174516 | 352 | 366 - | 0.00012  | GGGGACACCCAGGGC |
| AR | ENSG00000239607 | 126 | 140 - | 0.00012  | TGGAACAAACTGACT |
| AR | ENSG00000100280 | 293 | 307 - | 0.000121 | AGGGACAGGAAGAGA |
| AR | ENSG00000178685 | 173 | 187 + | 0.000121 | CAGCACACTGAGTCT |
| AR | ENSG00000224295 | 168 | 182 + | 0.000122 | AAGTACTTACTGCGC |
| AR | ENSG00000207437 | 90  | 104 - | 0.000122 | AGGAACAAGATGGAA |
| AR | ENSG00000232682 | 81  | 95 +  | 0.000124 | AGGCACACAGGGTTT |
| AR | ENSG00000213689 | 127 | 141 + | 0.000124 | AAGGACAAGCTCTTC |
| AR | ENSG00000234076 | 5   | 19 +  | 0.000124 | GAGGACAGACAGTGG |
| AR | ENSG00000213443 | 88  | 102 + | 0.000125 | AAGAACAGTATGGGG |
| AR | ENSG00000226363 | 174 | 188 + | 0.000125 | TGGTACAGGCAGTGT |
| AR | ENSG00000235529 | 20  | 34 +  | 0.000125 | GAGAACAGGCAGATG |
| AR | ENSG00000163806 | 338 | 352 + | 0.000128 | AAGTACATGCTGGGA |
| AR | ENSG00000179222 | 193 | 207 + | 0.000128 | AGGCACAGGAAGTTG |
| AR | ENSG00000133027 | 64  | 78 -  | 0.000129 | GAGAACTACAAGTCC |
| AR | ENSG00000155744 | 158 | 172 - | 0.00013  | GAGAACACGCTCTCA |
| AR | ENSG00000093100 | 269 | 283 - | 0.00013  | AAGTACAGTCTGAAG |
| AR | ENSG00000139350 | 105 | 119 - | 0.000133 | GGGTACAGAGGGTCT |
| AR | ENSG00000243725 | 289 | 303 + | 0.000134 | TGGAACAACCTGGGC |
| AR | ENSG00000255909 | 110 | 124 + | 0.000134 | AAGCACAGTCTCAGC |
| AR | ENSG00000140943 | 192 | 206 + | 0.000134 | CGGGACAGACAGGGC |
| AR | ENSG00000179409 | 84  | 98 +  | 0.000134 | GGGAACATTTTGGTT |
| AR | ENSG00000207110 | 91  | 105 - | 0.000134 | AAGCACATCTAGCAC |
| AR | ENSG00000255329 | 316 | 330 + | 0.000135 | TAGGACAATCAGTCC |
| AR | ENSG00000255990 | 299 | 313 + | 0.000137 | CAGCACACTGAGCCC |
| AR | ENSG00000171853 | 94  | 108 + | 0.000137 | AAGTACAGGGTCCGC |
| AR | ENSG00000224020 | 107 | 121 - | 0.000137 | AAGCACATTTAGTCA |
| AR | ENSG00000115267 | 230 | 244 + | 0.000138 | AAGAACTGCCTGACA |
| AR | ENSG00000256390 | 19  | 33 +  | 0.000139 | CAGGACAGACTGTGG |
| AR | ENSG00000172794 | 248 | 262 + | 0.000139 | TAGTACACGCTGGGC |
| AR | ENSG00000234336 | 352 | 366 - | 0.000139 | GAGCACATCGAGGAC |

|    |                 |     |       |          |                  |
|----|-----------------|-----|-------|----------|------------------|
| AR | ENSG00000173281 | 354 | 368 - | 0.000139 | GGGAACAGGGACAGC  |
| AR | ENSG00000197892 | 116 | 130 + | 0.000139 | GGGAACTACAAGTCC  |
| AR | ENSG00000143416 | 269 | 283 - | 0.00014  | TGGTACACTTTGATC  |
| AR | ENSG00000100316 | 171 | 185 + | 0.00014  | GAGAACTGCTTGAAC  |
| AR | ENSG00000227848 | 62  | 76 +  | 0.000141 | TAGAACATGGAGGCC  |
| AR | ENSG00000133193 | 278 | 292 + | 0.000141 | AGGGACACAATGATG  |
| AR | ENSG00000204498 | 104 | 118 - | 0.000141 | GGGTACTGCCTGAGC  |
| AR | ENSG00000116171 | 111 | 125 + | 0.000143 | GGGGACAGGTTGACT  |
| AR | ENSG00000121310 | 260 | 274 - | 0.000143 | GGGGACAGGTTGACT  |
| AR | ENSG00000142949 | 203 | 217 + | 0.000145 | GAGAACACGAGGTCA  |
| AR | ENSG00000228838 | 108 | 122 + | 0.000145 | GGGGACAGAATGGAA  |
| AR | ENSG00000255010 | 278 | 292 - | 0.000146 | GAGCACATCAAGGCC  |
| AR | ENSG00000252304 | 170 | 184 - | 0.000147 | AGGAACAGTGGGAAT  |
| AR | ENSG00000165792 | 71  | 85 -  | 0.000149 | GAGAACTCTGAGTCT  |
| AR | ENSG00000153046 | 183 | 197 - | 0.00015  | AGGAACAAAGGGGTC  |
| AR | ENSG00000247670 | 89  | 103 - | 0.00015  | CGGAACACTCAGAAA  |
| AR | ENSG00000176444 | 185 | 199 - | 0.000151 | AGGAACAGAGGGTGG  |
| AR | ENSG00000224055 | 329 | 343 - | 0.000151 | TAGAACATGTAGACC  |
| AR | ENSG00000152672 | 380 | 394 - | 0.000152 | AAGGACAGGCAGGCT  |
| AR | ENSG00000242247 | 3   | 17 -  | 0.000154 | AAGGACAGCAGGTTT  |
| AR | ENSG00000230042 | 169 | 183 + | 0.000154 | TGGCACAGCCTGGGC  |
| AR | ENSG00000242761 | 319 | 333 + | 0.000154 | AAGGACAAACTTC    |
| AR | ENSG00000234271 | 178 | 192 + | 0.000155 | CAGGACAGGGTGAGA  |
| AR | ENSG00000251447 | 85  | 99 +  | 0.000155 | CAGCACATTGTGATT  |
| AR | ENSG00000151164 | 144 | 158 - | 0.000156 | CAGAACAGGAAGTAG  |
| AR | ENSG00000080815 | 254 | 268 + | 0.000156 | TGGGACAGGCAGCTC  |
| AR | ENSG00000163661 | 238 | 252 + | 0.000156 | AAGGACTCTCTGCTC  |
| AR | ENSG00000228834 | 173 | 187 + | 0.000156 | AAGAACACAGCGGAC  |
| AR | ENSG00000235763 | 194 | 208 - | 0.000159 | TAGAACATGATGCTA  |
| AR | ENSG00000232398 | 258 | 272 + | 0.000159 | CAGAACAATGTCTAC  |
| AR | ENSG00000100811 | 159 | 173 + | 0.00016  | AAGAACAACACCTC   |
| AR | ENSG00000250487 | 125 | 139 - | 0.00016  | AAGTACACAATGCAG  |
| AR | ENSG00000223878 | 209 | 223 - | 0.000161 | AAGAACATGGTGGGG  |
| AR | ENSG00000164163 | 11  | 25 -  | 0.000163 | CAGGACATTCAGTTA  |
| AR | ENSG00000248881 | 142 | 156 - | 0.000163 | AAGAACTCACAGACT  |
| AR | ENSG00000182899 | 75  | 89 +  | 0.000164 | GGGAACATCCTCCAC  |
| AR | ENSG00000248399 | 210 | 224 + | 0.000164 | AAGTACATTAAGCCA  |
| AR | ENSG00000168237 | 372 | 386 - | 0.000165 | AGGCACTGACTGGGC  |
| AR | ENSG00000148344 | 159 | 173 - | 0.000165 | AAGCACAAAGTGGGA  |
| AR | ENSG00000255276 | 115 | 129 + | 0.000167 | GAGCACACCATGGCT  |
| AR | ENSG00000100385 | 10  | 24 -  | 0.000167 | GGGGACACAGAGCCA  |
| AR | ENSG00000249310 | 89  | 103 + | 0.000168 | AAGTACTTGATGTCT  |
| AR | ENSG00000229732 | 313 | 327 + | 0.00017  | GAGCACAGAGGGCCC  |
| AR | ENSG00000249319 | 114 | 128 - | 0.00017  | GAGGACAGGGAGTGG  |
| AR | ENSG00000114388 | 57  | 71 -  | 0.000171 | GGGTACACGTTGACA  |
| AR | ENSG00000231980 | 183 | 197 + | 0.000171 | GGGCACTGGCTGACC  |
| AR | ENSG00000161980 | 267 | 281 + | 0.000172 | GGGAACGGGCTGATC  |
| AR | ENSG00000072201 | 231 | 245 + | 0.000172 | TGGAAGTGTAAAGTCC |
| AR | ENSG00000258607 | 1   | 15 -  | 0.000172 | CAGGACAGTGGGTGC  |
| AR | ENSG00000244723 | 155 | 169 - | 0.000174 | CAGAACAATTAGTCT  |

|    |                 |     |       |          |                 |
|----|-----------------|-----|-------|----------|-----------------|
| AR | ENSG00000114942 | 185 | 199 + | 0.000176 | AAGGACAACTTGGAC |
| AR | ENSG00000164032 | 268 | 282 + | 0.000176 | GGGAACATTCTGCAG |
| AR | ENSG00000256159 | 182 | 196 + | 0.000178 | GAGAACAGCCACCAC |
| AR | ENSG00000066136 | 181 | 195 + | 0.000179 | GAGCACAGCTTCTGC |
| AR | ENSG00000255158 | 184 | 198 + | 0.000179 | AAGCACAGAGAGAGG |
| AR | ENSG00000096093 | 105 | 119 + | 0.000179 | GAGAACGCGGAGTCC |
| AR | ENSG00000073614 | 138 | 152 - | 0.000181 | GGGCACAAGCTCTTC |
| AR | ENSG00000248492 | 113 | 127 + | 0.000181 | CAGCACAGAAAGAAT |
| AR | ENSG00000253950 | 381 | 395 - | 0.000181 | GAGAACTCAGGGTGC |
| AR | ENSG00000229212 | 204 | 218 - | 0.000183 | GAGTACACGCGGAGC |
| AR | ENSG00000104325 | 219 | 233 - | 0.000183 | CGGGACAAAAGAAC  |
| AR | ENSG00000095574 | 63  | 77 -  | 0.000185 | GGGTACTGAGTGGGC |
| AR | ENSG00000254452 | 26  | 40 +  | 0.000185 | AAGCACAAGCAGCTT |
| AR | ENSG00000137817 | 263 | 277 - | 0.000185 | AGGAACAAGCAGGAA |
| AR | ENSG00000047648 | 356 | 370 - | 0.000185 | GGGGACACCGAGCGT |
| AR | ENSG00000183020 | 157 | 171 + | 0.000186 | AAGGACAGTGAGGCA |
| AR | ENSG00000168386 | 44  | 58 -  | 0.000186 | AAGCACAACCTGGGT |
| AR | ENSG00000251095 | 174 | 188 + | 0.000186 | TAGAACAATATGCTT |
| AR | ENSG00000248772 | 61  | 75 -  | 0.000188 | TGGAACAACAAGTGA |
| AR | ENSG00000005022 | 4   | 18 -  | 0.000188 | GAGAACACCCGGGAC |
| AR | ENSG00000237416 | 348 | 362 + | 0.000189 | CAGAACAGGAAGGAT |
| AR | ENSG00000176532 | 174 | 188 + | 0.000189 | GGGAACGCGAAGTTC |
| AR | ENSG00000206874 | 139 | 153 - | 0.000189 | AAGAACTTACTGCAA |
| AR | ENSG00000233885 | 261 | 275 + | 0.000191 | GGGAACAGGCAGCGG |
| AR | ENSG00000125733 | 269 | 283 - | 0.000192 | AAGAAGAGGAAGTCC |
| AR | ENSG00000126226 | 366 | 380 - | 0.000194 | GGGGACACACGGAAC |
| AR | ENSG00000172345 | 97  | 111 - | 0.000194 | CAGGACAAGGAGACC |
| AR | ENSG00000109046 | 298 | 312 + | 0.000194 | GGGTACAGGGTCTAT |
| AR | ENSG00000145016 | 306 | 320 - | 0.000194 | AAGGACACGGAGGAT |
| AR | ENSG00000256268 | 78  | 92 +  | 0.000195 | CAGAACACCCAGGCT |
| AR | ENSG00000100934 | 192 | 206 - | 0.000195 | GAGAACGGCGTGAAC |
| AR | ENSG00000155269 | 259 | 273 + | 0.000195 | AGGGACACTGAGGCT |
| AR | ENSG00000120738 | 348 | 362 - | 0.000197 | GGGAACACTGAGAAG |
| AR | ENSG00000201207 | 158 | 172 + | 0.000197 | AGGGACAAATTGCCT |
| AR | ENSG00000203276 | 117 | 131 - | 2.00E-04 | AGGAACTGTTTGATT |
| AR | ENSG00000253536 | 344 | 358 - | 2.00E-04 | AAGAACTGGCAGCTT |
| AR | ENSG00000107201 | 313 | 327 + | 2.00E-04 | AGGCACAGCCTGCGG |
| AR | ENSG00000245532 | 297 | 311 + | 0.000201 | GGGGACAGACAGGGA |
| AR | ENSG00000258725 | 219 | 233 + | 0.000201 | TGGAACAAACAGACT |
| AR | ENSG00000255905 | 151 | 165 - | 0.000201 | GGGAACTACCTGCAC |
| AR | ENSG00000213592 | 206 | 220 - | 0.000203 | AAGAACACGGGGTTG |
| AR | ENSG00000198553 | 231 | 245 - | 0.000203 | GGGAACTTGCAGTAT |
| AR | ENSG00000130813 | 67  | 81 +  | 0.000203 | GAGAACAGAGAGGAG |
| AR | ENSG00000170509 | 371 | 385 - | 0.000203 | GAGAACAATCTCCCC |
| AR | ENSG00000224892 | 213 | 227 + | 0.000204 | AGGCACTCTCTGTCA |
| AR | ENSG00000174748 | 230 | 244 + | 0.000206 | AGGGACACAGCGAGC |
| AR | ENSG00000224315 | 10  | 24 -  | 0.000207 | GGGAACTTTATGGCC |
| AR | ENSG00000115211 | 17  | 31 -  | 0.000207 | GGGGACTCGCTGAGC |
| AR | ENSG00000243364 | 214 | 228 - | 0.000211 | AGGTACAAAGTGAAG |
| AR | ENSG00000225374 | 152 | 166 + | 0.000211 | AAGAAGAGACTGTCA |

|    |                 |     |       |          |                  |
|----|-----------------|-----|-------|----------|------------------|
| AR | ENSG00000039523 | 44  | 58 -  | 0.000212 | CAGAAGAGAATGTGC  |
| AR | ENSG00000169762 | 305 | 319 + | 0.000212 | AAGGACACAGTGGTG  |
| AR | ENSG00000149564 | 375 | 389 - | 0.000214 | AGGAACAAAAACCGC  |
| AR | ENSG00000258830 | 140 | 154 - | 0.000214 | GGGAACCTTCTTGAAC |
| AR | ENSG00000232371 | 89  | 103 + | 0.000214 | CAGGACAGAAAGCCT  |
| AR | ENSG00000236472 | 250 | 264 + | 0.000215 | AGGAACTCGATCTCC  |
| AR | ENSG00000229638 | 138 | 152 - | 0.000215 | AGGAAAAGCATGTTC  |
| AR | ENSG00000229534 | 350 | 364 - | 0.000217 | GAGCACTTGGTGTTC  |
| AR | ENSG00000111615 | 198 | 212 + | 0.000217 | AAGAACAGTTTCATT  |
| AR | ENSG00000164621 | 218 | 232 + | 0.000219 | AAGCACAAAATGATG  |
| AR | ENSG00000232912 | 375 | 389 + | 0.00022  | AGGAAGAGTGTGAGC  |
| AR | ENSG00000145741 | 350 | 364 + | 0.00022  | AGGTACAAAAAGGCT  |
| AR | ENSG00000106628 | 358 | 372 + | 0.00022  | GGGGACAACGAGGAC  |
| AR | ENSG00000167085 | 128 | 142 + | 0.000224 | CAGAACTCACAGCGC  |
| AR | ENSG00000250644 | 269 | 283 + | 0.000225 | CAGGACACTGTGTCC  |
| AR | ENSG00000242777 | 284 | 298 + | 0.000225 | GAGGACAGAAACATC  |
| AR | ENSG00000101654 | 122 | 136 - | 0.000227 | CGGAACTACGAGTCC  |
| AR | ENSG00000257851 | 355 | 369 + | 0.000229 | GAGGACATTTTGAGA  |
| AR | ENSG00000164051 | 125 | 139 + | 0.00023  | AGGCAGAGCGTGTTC  |
| AR | ENSG00000112695 | 151 | 165 - | 0.00023  | CAGAACATAATCTCA  |
| AR | ENSG00000237259 | 161 | 175 + | 0.000232 | CAGCACATGCTGCAT  |
| AR | ENSG00000100154 | 259 | 273 + | 0.000232 | GGGAACATGGCGCGC  |
| AR | ENSG00000134014 | 18  | 32 -  | 0.000232 | GGGCACTGCCTGTGA  |
| AR | ENSG00000223522 | 336 | 350 - | 0.000236 | AGGCACGGAGTGTTC  |
| AR | ENSG00000234483 | 174 | 188 - | 0.000239 | AAGAAAACCATGTTC  |
| AR | ENSG00000256813 | 87  | 101 + | 0.000241 | GGGAACAGTGAGGTG  |
| AR | ENSG00000226784 | 146 | 160 - | 0.000241 | AGGTACAAAAGGTTA  |
| AR | ENSG00000109079 | 97  | 111 + | 0.000246 | AAGCACTTACAGCCC  |
| AR | ENSG00000141219 | 122 | 136 + | 0.000246 | GGGAACAGAGGGGGT  |
| AR | ENSG00000105675 | 332 | 346 + | 0.000246 | GAGAACTATGAGTCT  |
| AR | ENSG00000114270 | 378 | 392 + | 0.000246 | CAGCACAGGGAGAGA  |
| AR | ENSG00000250623 | 45  | 59 -  | 0.00025  | TGGTACTTTCTGTGC  |
| AR | ENSG00000233793 | 252 | 266 - | 0.00025  | TGGGACATCTTGAAC  |
| AR | ENSG00000237827 | 22  | 36 -  | 0.000251 | AAGGACTTTATGTCA  |
| AR | ENSG00000258088 | 22  | 36 -  | 0.000251 | AGGTACAGTTTCTCT  |
| AR | ENSG00000145730 | 171 | 185 - | 0.000251 | AGGGACACTGAGGAA  |
| AR | ENSG00000085563 | 226 | 240 + | 0.000251 | TAGAACATGAAGAAA  |
| AR | ENSG00000139163 | 127 | 141 - | 0.000255 | GGGAACCTGCTAGTCT |
| AR | ENSG00000078687 | 128 | 142 - | 0.000255 | AAGCACTAGCTGCTC  |
| AR | ENSG00000151466 | 41  | 55 -  | 0.000255 | TGGGACAGTGTCTCC  |
| AR | ENSG00000115841 | 226 | 240 - | 0.000257 | AGGGACAGTGACAAC  |
| AR | ENSG00000200091 | 38  | 52 +  | 0.000257 | AGGGACTAACTGTGA  |
| AR | ENSG00000179988 | 62  | 76 +  | 0.000259 | CGGTACAGCGTGGAA  |
| AR | ENSG00000151006 | 363 | 377 - | 0.000259 | AAGAACAATTTGGCG  |
| AR | ENSG00000188313 | 200 | 214 - | 0.00026  | AGGAACTGGGACTCC  |
| AR | ENSG00000111845 | 163 | 177 - | 0.000262 | CGGGACATCCTCTGC  |
| AR | ENSG00000138434 | 275 | 289 - | 0.000264 | GGGGACAGGGAGGGA  |
| AR | ENSG00000178836 | 385 | 399 + | 0.000264 | GAGGACAGGGAGGAA  |
| AR | ENSG00000147403 | 33  | 47 +  | 0.000264 | GGGAAGACAGTGACC  |
| AR | ENSG00000198056 | 217 | 231 - | 0.000268 | GGGAACAGCACGGCC  |



|    |                 |     |       |          |                  |
|----|-----------------|-----|-------|----------|------------------|
| AR | ENSG00000134490 | 338 | 352 - | 0.000268 | AGGTACAAAAGGTGA  |
| AR | ENSG00000238567 | 318 | 332 + | 0.000268 | AAGAACAACCTGGTAT |
| AR | ENSG00000232073 | 291 | 305 + | 0.000268 | GGGAACATAATCCCT  |
| AR | ENSG00000119509 | 95  | 109 - | 0.000268 | GAGGACTCAGTGGAC  |
| AR | ENSG00000258653 | 117 | 131 + | 0.000272 | CAGTACAGCCTCTTT  |
| AR | ENSG00000197429 | 295 | 309 + | 0.000274 | GGGAACTTCCTCTTC  |
| AR | ENSG00000257241 | 380 | 394 + | 0.000274 | AGGTACATGCACAGC  |
| AR | ENSG00000207601 | 80  | 94 -  | 0.000278 | AGGGACTTGTAGTCC  |
| AR | ENSG00000028116 | 247 | 261 - | 0.000279 | GAGGACAATCAGAGA  |
| AR | ENSG00000243135 | 173 | 187 + | 0.000279 | AGGCACAGCGTGGGG  |
| AR | ENSG00000153071 | 146 | 160 - | 0.000279 | AGGAACTGACTCTTA  |
| AR | ENSG00000159884 | 371 | 385 + | 0.000279 | GGGCACACCCAGGTA  |
| AR | ENSG00000149735 | 227 | 241 - | 0.000281 | AGGAACAGAGCGGCT  |
| AR | ENSG00000133111 | 93  | 107 - | 0.000281 | CGGGACTGACTGCGC  |
| AR | ENSG00000223703 | 61  | 75 -  | 0.000281 | AGGCACTCTGTGATT  |
| AR | ENSG00000184304 | 78  | 92 +  | 0.000283 | AAGAAAAGAAAGTAC  |
| AR | ENSG00000241499 | 169 | 183 - | 0.000283 | TAGCACAGAAAGCCT  |
| AR | ENSG00000130702 | 221 | 235 - | 0.000283 | AGGGACAGCGCGCGC  |
| AR | ENSG00000011198 | 124 | 138 - | 0.000283 | AGGTACTTCGAGTTA  |
| AR | ENSG00000236256 | 342 | 356 + | 0.000283 | GAGCACTGAAAGTCA  |
| AR | ENSG00000254872 | 45  | 59 -  | 0.000285 | AGGGACAGGCAGCTG  |
| AR | ENSG00000184635 | 272 | 286 - | 0.000285 | CAGGACACAGAGTAG  |
| AR | ENSG00000136045 | 163 | 177 - | 0.000287 | GGGGACAAAATGGAA  |
| AR | ENSG00000258212 | 347 | 361 + | 0.000287 | AGGCACTTCCAGACC  |
| AR | ENSG00000100296 | 372 | 386 - | 0.000289 | GGGAACAGGGGTCTAG |
| AR | ENSG00000177868 | 293 | 307 + | 0.000291 | AGGTACAGACTCCCA  |
| AR | ENSG00000152778 | 9   | 23 -  | 0.000291 | GAGTACGCTGAGTTC  |
| AR | ENSG00000139626 | 253 | 267 + | 0.000291 | CAGTACACAAAGGCT  |
| AR | ENSG00000170191 | 141 | 155 + | 0.000291 | AAGAACACCACGCTT  |
| AR | ENSG00000205413 | 364 | 378 + | 0.000291 | AAGTACAATATCTAT  |
| AR | ENSG00000089127 | 252 | 266 + | 0.000293 | AAGGACAAAGGGTAA  |
| AR | ENSG00000214167 | 13  | 27 -  | 0.000293 | GGGGACAAAGTCAGC  |
| AR | ENSG00000197114 | 179 | 193 + | 0.000293 | GGGAACACACTCGCT  |
| AR | ENSG00000155016 | 160 | 174 + | 0.000293 | AGGGACAGTCACCGC  |
| AR | ENSG00000248546 | 234 | 248 + | 0.000293 | CGGAACAGGGCGCCC  |
| AR | ENSG00000198742 | 387 | 401 - | 0.000293 | CGGGACACAAACTCC  |
| AR | ENSG00000230953 | 64  | 78 +  | 0.000295 | GGGAACAGTGGGCAA  |
| AR | ENSG00000109475 | 153 | 167 - | 0.000295 | CAGGACAGGAAGTTG  |
| AR | ENSG00000112096 | 369 | 383 + | 0.000295 | AGGGACGGAGTGCGC  |
| AR | ENSG00000250641 | 159 | 173 + | 0.000295 | GGGGACACCAGGTCT  |
| AR | ENSG00000239783 | 138 | 152 - | 0.000297 | AGGAACATGCAGGAG  |
| AR | ENSG00000131381 | 328 | 342 + | 0.000297 | GGGTACATACAGAGG  |
| AR | ENSG00000144802 | 152 | 166 + | 0.000297 | GAGAACTGAAAGCGA  |
| AR | ENSG00000237996 | 183 | 197 - | 0.000299 | GAGGACTGCTTGAGC  |
| AR | ENSG00000185482 | 25  | 39 -  | 0.000302 | AGGGACAGTTTCTGT  |
| AR | ENSG00000010404 | 105 | 119 - | 0.000306 | TGGAACAGGCACATC  |
| AR | ENSG00000233246 | 99  | 113 - | 0.000308 | GGGGACAGCGCGAGC  |
| AR | ENSG00000127080 | 199 | 213 - | 0.000308 | AGGTACTGGTAGAGC  |
| AR | ENSG00000244336 | 17  | 31 -  | 0.000308 | GAGTACAGTTTCTGT  |
| AR | ENSG00000198431 | 193 | 207 - | 0.00031  | GGGAACTGACGGAGC  |

|    |                 |     |       |          |                  |
|----|-----------------|-----|-------|----------|------------------|
| AR | ENSG00000178623 | 117 | 131 + | 0.00031  | CAGGACTGGGTGTGT  |
| AR | ENSG00000216895 | 254 | 268 + | 0.00031  | GAGGACACACAGAAG  |
| AR | ENSG00000104388 | 112 | 126 + | 0.00031  | CGGAACAACCGGAGC  |
| AR | ENSG00000189337 | 170 | 184 - | 0.000312 | AAGGACACCCGCGCGC |
| AR | ENSG00000149089 | 72  | 86 +  | 0.000316 | CAGCACAGCCTGATG  |
| AR | ENSG00000119638 | 132 | 146 + | 0.000316 | GGGAAGAAGGTGTAC  |
| AR | ENSG00000126062 | 152 | 166 - | 0.000316 | TAGAACTACAAGTCC  |
| AR | ENSG00000249242 | 290 | 304 - | 0.000316 | AAGGACAGAATCTTG  |
| AR | ENSG00000255782 | 291 | 305 + | 0.000318 | TGGGACACCCAGGAC  |
| AR | ENSG00000168724 | 332 | 346 + | 0.000318 | GAGGACTGCCAGCGC  |
| AR | ENSG00000247872 | 276 | 290 + | 0.000318 | CGGGACAGGCAGTGG  |
| AR | ENSG00000224665 | 275 | 289 - | 0.000318 | GGGTACAGCAGGGCC  |
| AR | ENSG00000197746 | 100 | 114 - | 0.000321 | AAGAACTTGGAGAAA  |
| AR | ENSG00000186615 | 225 | 239 + | 0.000321 | CGGTACTCGCTGCTC  |
| AR | ENSG00000099953 | 327 | 341 - | 0.000321 | GGGGACAGACAGCCG  |
| AR | ENSG00000238300 | 285 | 299 + | 0.000321 | TAGGACTGAGTGTCT  |
| AR | ENSG00000254964 | 338 | 352 + | 0.000323 | AAGAACTCCCAGCCA  |
| AR | ENSG00000213145 | 160 | 174 + | 0.000323 | CGGGACAGACTCCGC  |
| AR | ENSG00000258011 | 36  | 50 +  | 0.000325 | GGGAACACACACACA  |
| AR | ENSG00000227528 | 88  | 102 - | 0.000325 | AAGGACAACCAGGTA  |
| AR | ENSG00000123349 | 219 | 233 + | 0.000327 | GAGAACTTTAAGATT  |
| AR | ENSG00000114735 | 169 | 183 + | 0.000327 | CGGAACACCCGGGCC  |
| AR | ENSG00000137210 | 171 | 185 + | 0.000327 | AAGGACACTGCGCAC  |
| AR | ENSG00000106028 | 222 | 236 - | 0.000327 | GGGAACGCAAAGCTC  |
| AR | ENSG00000228775 | 191 | 205 + | 0.000327 | GGGAACGCAAAGCTC  |
| AR | ENSG00000244663 | 63  | 77 +  | 0.000327 | CAGGACAATCTGCAT  |
| AR | ENSG00000167588 | 241 | 255 - | 0.000329 | GGGTACAGACAGGTG  |
| AR | ENSG00000075415 | 16  | 30 +  | 0.000331 | AGGGACAAAGCGAGC  |
| AR | ENSG00000093009 | 164 | 178 - | 0.000331 | AAGGACAATGGGCC   |
| AR | ENSG00000189269 | 231 | 245 - | 0.000331 | GAGCACAGTTGGAGC  |
| AR | ENSG00000204642 | 325 | 339 + | 0.000331 | AAGAAGAAACTGTCT  |
| AR | ENSG00000241404 | 160 | 174 + | 0.000331 | GAGGACTCTCTGGCC  |
| AR | ENSG00000254876 | 15  | 29 +  | 0.000331 | GGGGACTGGGAGCGC  |
| AR | ENSG00000233603 | 131 | 145 + | 0.000334 | AAGCACTGCCTCTGC  |
| AR | ENSG00000249055 | 161 | 175 - | 0.000334 | TGGGACAGAGAGCCA  |
| AR | ENSG00000156170 | 71  | 85 -  | 0.000334 | CGGGACAGCTAGGGC  |
| AR | ENSG00000254460 | 56  | 70 -  | 0.000336 | CAGGACAGGAAGCCA  |
| AR | ENSG00000084754 | 224 | 238 - | 0.000336 | GAGCACTGCCTGACT  |
| AR | ENSG00000070601 | 332 | 346 - | 0.000336 | GGGGACAGGCCGTCT  |
| AR | ENSG00000119608 | 375 | 389 + | 0.000338 | GAGCACATCCAGGCA  |
| AR | ENSG00000105877 | 16  | 30 -  | 0.000338 | TGGGACAAGCAGCGC  |
| AR | ENSG00000175147 | 244 | 258 + | 0.00034  | GGGTACATATGGTGT  |
| AR | ENSG00000033011 | 277 | 291 + | 0.00034  | GAGGACAGGGGGGAC  |
| AR | ENSG00000233221 | 129 | 143 - | 0.000343 | GAGCACAGCCCCGCGC |
| AR | ENSG00000228172 | 210 | 224 - | 0.000345 | GGGGACACAGACCCC  |
| AR | ENSG00000237149 | 342 | 356 + | 0.000345 | AGGTACTCGGGGTGC  |
| AR | ENSG00000163918 | 376 | 390 + | 0.000347 | CAGGACAAGGAGGAC  |
| AR | ENSG00000171097 | 188 | 202 + | 0.000347 | AAGCACAAGGAGGCA  |
| AR | ENSG00000092470 | 350 | 364 - | 0.000349 | GAGCACACCTTGGAA  |
| AR | ENSG00000183077 | 91  | 105 + | 0.000349 | AGGGACTGGGAGGGC  |

|    |                 |     |       |          |                 |
|----|-----------------|-----|-------|----------|-----------------|
| AR | ENSG00000163815 | 321 | 335 + | 0.000349 | TGGAACACTGAGGAA |
| AR | ENSG00000185885 | 196 | 210 - | 0.000352 | GAGAACTGACTCCCC |
| AR | ENSG00000243284 | 197 | 211 + | 0.000354 | GGGCACTCATTGCAC |
| AR | ENSG00000119703 | 329 | 343 + | 0.000354 | AAGTACATGGGGATA |
| AR | ENSG00000114544 | 2   | 16 +  | 0.000354 | AAGCACATGCAGCTG |
| AR | ENSG00000198492 | 44  | 58 +  | 0.000356 | GGGGACTGTGTGACT |
| AR | ENSG00000121749 | 384 | 398 + | 0.000356 | AGGGACACGAGGGAC |
| AR | ENSG00000213741 | 318 | 332 + | 0.000356 | TAGAACTGTCTGAGT |
| AR | ENSG00000222020 | 341 | 355 + | 0.000356 | GGGCACACAATGGGG |
| AR | ENSG00000099901 | 246 | 260 + | 0.000356 | AAGCACAGGCCGGGC |
| AR | ENSG00000076554 | 146 | 160 + | 0.000359 | GAGGACAAAGGGTGA |
| AR | ENSG00000159423 | 1   | 15 -  | 0.000361 | AAGGACTCGCTGCGT |
| AR | ENSG00000170027 | 62  | 76 +  | 0.000361 | AAGGACGGGGTGCC  |
| AR | ENSG00000212125 | 147 | 161 - | 0.000363 | CAGCACTGGCTGTGA |
| AR | ENSG00000257298 | 326 | 340 + | 0.000363 | AGGAAAAATCTGTTC |
| AR | ENSG00000258064 | 270 | 284 - | 0.000363 | AAGAAAAGTGTGTTT |
| AR | ENSG00000222489 | 373 | 387 - | 0.000363 | AGGTACATTTTCTTA |
| AR | ENSG00000247853 | 357 | 371 - | 0.000366 | AAGGACTGTATCTGC |
| AR | ENSG00000259118 | 361 | 375 + | 0.000366 | GGGAACACAGGGGAA |
| AR | ENSG00000232485 | 44  | 58 +  | 0.000366 | AGGCAGATAGAGTTC |
| AR | ENSG00000235652 | 145 | 159 - | 0.000366 | CGGGACTGCGTGCGC |
| AR | ENSG00000130222 | 351 | 365 + | 0.000366 | AAGCACAGCCAGGTG |
| AR | ENSG00000242517 | 273 | 287 + | 0.000366 | GAGGACACTCTGGTG |
| AR | ENSG00000172543 | 248 | 262 + | 0.000368 | TGGCACTGACTGCCC |
| AR | ENSG00000125691 | 281 | 295 - | 0.000368 | AAGGCACTGGGATA  |
| AR | ENSG00000240766 | 251 | 265 + | 0.000368 | AAGGACTGGTAGAAC |
| AR | ENSG00000228275 | 72  | 86 +  | 0.000368 | TGGAAGAGCCTGTCC |
| AR | ENSG00000110108 | 208 | 222 + | 0.00037  | TAGAACTACATGACC |
| AR | ENSG00000105397 | 299 | 313 + | 0.00037  | GGGGACAAGCAGTAG |
| AR | ENSG00000072274 | 375 | 389 - | 0.00037  | GAGGACACGAGGGTC |
| AR | ENSG00000171604 | 199 | 213 - | 0.00037  | AAGAAAACGCAGTCC |
| AR | ENSG00000245521 | 5   | 19 +  | 0.00037  | GGGAACTGAGGGCCC |
| AR | ENSG00000174791 | 92  | 106 + | 0.000373 | TAGCACTGAGTGTCA |
| AR | ENSG00000207392 | 377 | 391 + | 0.000373 | GGGAACTTTATGTAG |
| AR | ENSG00000073910 | 76  | 90 +  | 0.000375 | GAGCACACCCGGGCC |
| AR | ENSG00000197102 | 22  | 36 +  | 0.000375 | TAGGACTCGCAGTGC |
| AR | ENSG00000253256 | 163 | 177 - | 0.000378 | CGGGACAGGATCAGC |
| AR | ENSG00000215301 | 245 | 259 - | 0.000378 | GAGAACAGAGGGAAG |
| AR | ENSG00000237779 | 364 | 378 - | 0.000378 | AAGAACTTTATGGAA |
| AR | ENSG00000151491 | 320 | 334 - | 0.00038  | GGGGACAGGGACCCC |
| AR | ENSG00000129194 | 149 | 163 + | 0.00038  | TGGGACAAACAGGAC |
| AR | ENSG00000083845 | 18  | 32 -  | 0.00038  | CAGCACACAATCCCC |
| AR | ENSG00000105640 | 37  | 51 +  | 0.00038  | TGGAACAGGTGGAGC |
| AR | ENSG00000232626 | 202 | 216 - | 0.000383 | CAGCACACGAAGCCA |
| AR | ENSG00000126368 | 287 | 301 - | 0.000383 | TGGGACAGAGGGCTC |
| AR | ENSG00000237380 | 149 | 163 + | 0.000383 | AGGAACGAAGTGATT |
| AR | ENSG00000154277 | 349 | 363 - | 0.000383 | AAGCACAAATTCAAC |
| AR | ENSG00000213760 | 158 | 172 - | 0.000383 | GGGAACAAGGTCATA |
| AR | ENSG00000064652 | 8   | 22 +  | 0.000385 | AGGAACAACAGGAAA |
| AR | ENSG00000164855 | 104 | 118 - | 0.000385 | GGGTACAGCTGGCAC |

|    |                 |     |       |          |                 |
|----|-----------------|-----|-------|----------|-----------------|
| AR | ENSG00000134508 | 52  | 66 -  | 0.000388 | GGGGACAGGGTGGAG |
| AR | ENSG00000151725 | 165 | 179 - | 0.000388 | CAGGACTTCCTGAGC |
| AR | ENSG00000129696 | 45  | 59 +  | 0.000388 | AAGAACAAACACAAA |
| AR | ENSG00000160712 | 48  | 62 +  | 0.00039  | AGGAACATCGCCTCC |
| AR | ENSG00000250317 | 238 | 252 - | 0.00039  | CAGAACAAGTGGGG  |
| AR | ENSG00000110047 | 386 | 400 + | 0.000392 | GGGGACAGCTTCCTC |
| AR | ENSG00000244134 | 331 | 345 - | 0.000392 | AAGCACAGGAAGGTG |
| AR | ENSG00000119684 | 198 | 212 + | 0.000392 | TGGAACAAGTGGTGC |
| AR | ENSG00000244468 | 39  | 53 +  | 0.000392 | GGGGACTTGGAGAAC |
| AR | ENSG00000107165 | 360 | 374 + | 0.000392 | AAGCACTACAAGTTT |
| AR | ENSG00000167996 | 6   | 20 +  | 0.000395 | GGGCACAGAGACGCC |
| AR | ENSG00000003056 | 44  | 58 +  | 0.000395 | CGGAACAGCGTCCCT |
| AR | ENSG00000184508 | 14  | 28 +  | 0.000395 | GAGCACACTGAGCTG |
| AR | ENSG00000234751 | 285 | 299 + | 0.000397 | CAGTACTGCCAGCTC |
| AR | ENSG00000216306 | 218 | 232 + | 0.000397 | AGGCACAGGGGCTCC |
| AR | ENSG00000198003 | 132 | 146 - | 0.000397 | GGGCACAGGGAGCGG |
| AR | ENSG00000227199 | 52  | 66 +  | 0.000397 | CGGCACTTGCTGAGC |
| AR | ENSG00000254088 | 90  | 104 + | 0.000397 | AAGGACATTTTGAAG |
| AR | ENSG00000205794 | 76  | 90 +  | 4.00E-04 | AGGCACTCGGAGGCC |
| AR | ENSG00000119723 | 13  | 27 -  | 0.000403 | TAGTACTCTATGACC |
| AR | ENSG00000197128 | 273 | 287 + | 0.000403 | CAGAACGCAATGTCA |
| AR | ENSG00000226143 | 317 | 331 + | 0.000403 | AAGAACACATACACA |
| AR | ENSG00000166278 | 332 | 346 - | 0.000403 | GGGGACAGAGACGCC |
| AR | ENSG00000177685 | 148 | 162 - | 0.000405 | AGGCACATCAGGGAC |
| AR | ENSG00000111229 | 221 | 235 + | 0.000405 | CGGAACTGCAAGGCC |
| AR | ENSG00000258521 | 270 | 284 - | 0.000405 | CAGCACATCTTGAAG |
| AR | ENSG00000151117 | 6   | 20 +  | 0.000408 | AAGAAGAGTAAGTAT |
| AR | ENSG00000230259 | 293 | 307 + | 0.000408 | GAGAACTCTAACTCC |
| AR | ENSG00000164180 | 289 | 303 + | 0.000408 | GGGAACAGAAGCAAC |
| AR | ENSG00000145425 | 332 | 346 + | 0.00041  | AAGAAGAAAGTGTA  |
| AR | ENSG00000243806 | 219 | 233 + | 0.00041  | AAGAAGAGAAGGTTT |
| AR | ENSG00000134333 | 47  | 61 +  | 0.000413 | AAGAAGAAACAGATC |
| AR | ENSG00000258545 | 24  | 38 -  | 0.000413 | AAGAACGCTGTGAAA |
| AR | ENSG00000176029 | 80  | 94 +  | 0.000415 | GAGAACACCCCCTCC |
| AR | ENSG00000139351 | 173 | 187 - | 0.000415 | GAGAAAAGCCAGTCC |
| AR | ENSG00000248341 | 85  | 99 +  | 0.000415 | GGGAACTTCCACTTC |
| AR | ENSG00000168484 | 161 | 175 - | 0.000415 | GAGCACACAGCGGCC |
| AR | ENSG00000226677 | 316 | 330 + | 0.000418 | CAGAAGAAGGTGTTT |
| AR | ENSG00000224281 | 184 | 198 + | 0.000418 | AGGCACACGCGCTTC |
| AR | ENSG00000129515 | 271 | 285 - | 0.00042  | GAGAACACCCACCAT |
| AR | ENSG00000235546 | 160 | 174 - | 0.00042  | AGGGACAGGACGGCC |
| AR | ENSG00000145014 | 64  | 78 -  | 0.00042  | GAGAACAAATACCCC |
| AR | ENSG00000258227 | 91  | 105 - | 0.00042  | AAGGACAATTTGAA  |
| AR | ENSG00000235471 | 272 | 286 - | 0.00042  | CAGCACACTGTGAAG |
| AR | ENSG00000186868 | 34  | 48 +  | 0.000423 | GAGGACACCCACCCC |
| AR | ENSG00000130714 | 381 | 395 + | 0.000423 | GGGGACACCGGGGAC |
| AR | ENSG00000230116 | 213 | 227 + | 0.000426 | AAGAACAAGCACCTT |
| AR | ENSG00000215127 | 261 | 275 + | 0.000426 | GAGTACATGAACTTA |
| AR | ENSG00000249144 | 310 | 324 - | 0.000426 | TAGCACATACTGATG |
| AR | ENSG00000125954 | 34  | 48 -  | 0.000428 | GGGCACAGTCTCCTT |

|    |                 |     |       |          |                 |
|----|-----------------|-----|-------|----------|-----------------|
| AR | ENSG00000207556 | 253 | 267 - | 0.000428 | AAGCACAGCGGGGTT |
| AR | ENSG00000251467 | 175 | 189 - | 0.000428 | TGGCACTGCCTGCTC |
| AR | ENSG00000229117 | 94  | 108 + | 0.000431 | AAGAACTAACTCAAC |
| AR | ENSG00000204618 | 168 | 182 - | 0.000431 | TAGCACACCTGGTTC |
| AR | ENSG00000135114 | 255 | 269 - | 0.000434 | GGGCACAGGAGGACT |
| AR | ENSG00000166548 | 348 | 362 - | 0.000434 | CAGAACACGGCGGGC |
| AR | ENSG00000064489 | 297 | 311 + | 0.000434 | CGGGACAGAGGGGGC |
| AR | ENSG00000178297 | 237 | 251 - | 0.000434 | GGGCACGAGGTGTAC |
| AR | ENSG00000095002 | 32  | 46 +  | 0.000434 | GGGCACATTACGAGC |
| AR | ENSG00000132394 | 54  | 68 -  | 0.000434 | AGGAACTGGAGGTCA |
| AR | ENSG00000180929 | 260 | 274 - | 0.000434 | TGGTACTGGCTGTCA |
| AR | ENSG00000130717 | 93  | 107 - | 0.000434 | CGGCACACCAGGAGC |
| AR | ENSG00000147586 | 328 | 342 + | 0.000436 | AGGCACTGAGAGTGG |
| AR | ENSG00000249007 | 123 | 137 + | 0.000439 | GGGTACAGGTGGGTC |
| AR | ENSG00000135631 | 209 | 223 + | 0.000439 | CGGAACAGAGGGGTA |
| AR | ENSG00000088298 | 100 | 114 - | 0.000442 | GGGGACGGAATGCAC |
| AR | ENSG00000204622 | 93  | 107 - | 0.000442 | GAGAACTGGGTCCGC |
| AR | ENSG00000077782 | 302 | 316 + | 0.000442 | GGGAACTACAAGGCC |
| AR | ENSG00000155962 | 53  | 67 +  | 0.000442 | TAGCACTGCATGTGT |
| AR | ENSG00000178796 | 85  | 99 +  | 0.000444 | CAGCACAAAGGGAGC |
| AR | ENSG00000137642 | 280 | 294 - | 0.000444 | CAGGAGAGAATGTGC |
| AR | ENSG00000244462 | 201 | 215 - | 0.000444 | AGGAACGGCGTGGTT |
| AR | ENSG00000214846 | 315 | 329 + | 0.000444 | AAGAACTATGACTCC |
| AR | ENSG00000245043 | 219 | 233 - | 0.000444 | GAGAACTGGCATC   |
| AR | ENSG00000142856 | 345 | 359 + | 0.000447 | TGGAACACCTTCACC |
| AR | ENSG00000226232 | 224 | 238 - | 0.000447 | AGGAACTGTGGGGTC |
| AR | ENSG00000220891 | 181 | 195 + | 0.000447 | AGGGACTGTATGCAA |
| AR | ENSG00000242251 | 247 | 261 + | 0.000447 | TGGGACAGGAGGATC |
| AR | ENSG00000128595 | 309 | 323 - | 0.000447 | CAGCACAGGATGCCG |
| AR | ENSG00000207165 | 215 | 229 - | 0.000447 | AGGAACTCAGTCGGC |
| AR | ENSG00000249755 | 203 | 217 + | 0.00045  | GGGCACAAGTAGCTT |
| AR | ENSG00000205089 | 351 | 365 - | 0.00045  | AGGAACGCCCAGGGC |
| AR | ENSG00000236507 | 204 | 218 + | 0.00045  | AAGCACTGAAAGTGG |
| AR | ENSG00000127720 | 190 | 204 - | 0.000453 | TAGCACAGGCAGGCT |
| AR | ENSG00000167165 | 82  | 96 +  | 0.000453 | GGGAACAGGAACTCG |
| AR | ENSG00000165675 | 91  | 105 + | 0.000453 | AAGAACAGCCTCCAG |
| AR | ENSG00000154309 | 292 | 306 + | 0.000455 | CGGGACTGGGAGACC |
| AR | ENSG00000236546 | 383 | 397 - | 0.000455 | GAGAAGAGGCAGTCT |
| AR | ENSG00000079819 | 5   | 19 +  | 0.000455 | GAGAACGCCTTGCCC |
| AR | ENSG00000236404 | 201 | 215 - | 0.000455 | GAGAACATGCCGCAT |
| AR | ENSG00000256898 | 110 | 124 + | 0.000458 | CAGTACTGGAAGTTA |
| AR | ENSG00000256223 | 3   | 17 +  | 0.000458 | CGGCACAGAGTGGCG |
| AR | ENSG00000135749 | 67  | 81 +  | 0.000461 | AGGCACTCACAGAAA |
| AR | ENSG00000134013 | 315 | 329 - | 0.000461 | GGGCACACACGCTGC |
| AR | ENSG00000255354 | 291 | 305 + | 0.000461 | AAGAAGAAGCTGCCC |
| AR | ENSG00000230194 | 339 | 353 - | 0.000464 | AAGAACTTCAGGTCT |
| AR | ENSG00000125245 | 124 | 138 - | 0.000466 | AGGCACACAGCCTTC |
| AR | ENSG00000240224 | 73  | 87 +  | 0.000466 | GGGCACTCTGTCTTC |
| AR | ENSG00000242515 | 192 | 206 - | 0.000466 | AAGTACAGGCACAAA |
| AR | ENSG00000174579 | 268 | 282 + | 0.000466 | GGGAACAGCGCGGGT |

|    |                 |     |       |          |                  |
|----|-----------------|-----|-------|----------|------------------|
| AR | ENSG00000223916 | 225 | 239 + | 0.000466 | GAGTACAAGGTGGTG  |
| AR | ENSG00000233558 | 132 | 146 - | 0.000466 | TGGCACAGACAGGAA  |
| AR | ENSG00000110719 | 347 | 361 - | 0.000469 | GGGAAGAGGGTGGGG  |
| AR | ENSG00000178878 | 161 | 175 - | 0.000469 | TGGAACAGAAGCTCC  |
| AR | ENSG00000255581 | 343 | 357 - | 0.000469 | CAGCACAGCTACTCC  |
| AR | ENSG00000221585 | 258 | 272 - | 0.000469 | GGGAACACAGGGCTG  |
| AR | ENSG00000102401 | 317 | 331 + | 0.000469 | AAGTACAAGTGGCCC  |
| AR | ENSG00000116652 | 132 | 146 + | 0.000472 | CAGGACATAATCTGA  |
| AR | ENSG00000183531 | 2   | 16 +  | 0.000472 | AGGGACAAGGAGACG  |
| AR | ENSG00000134982 | 35  | 49 -  | 0.000472 | CAGCACTTACTGGCC  |
| AR | ENSG00000231542 | 16  | 30 +  | 0.000472 | GGGTACAAACTCAGT  |
| AR | ENSG00000253528 | 204 | 218 - | 0.000475 | AAGTACATAGCCTGC  |
| AR | ENSG00000197882 | 379 | 393 - | 0.000478 | AAGGACAGGTTGGAG  |
| AR | ENSG00000137821 | 277 | 291 - | 0.000478 | GAGGACTTGCTGCTT  |
| AR | ENSG00000168092 | 13  | 27 -  | 0.000481 | AGGGACATGGGCTTC  |
| AR | ENSG00000258660 | 231 | 245 + | 0.000481 | GAGTACAGTCACT    |
| AR | ENSG00000212978 | 34  | 48 -  | 0.000481 | GAGGACATGTTGACG  |
| AR | ENSG00000114670 | 26  | 40 -  | 0.000481 | GAGAACACCTGCTCC  |
| AR | ENSG00000171163 | 28  | 42 +  | 0.000484 | GAGCACAGGAGGCT   |
| AR | ENSG00000227056 | 117 | 131 - | 0.000484 | TGGCACACTTTGCAT  |
| AR | ENSG00000012822 | 250 | 264 - | 0.000484 | AAGGACTTCAAGGCC  |
| AR | ENSG00000226360 | 270 | 284 - | 0.000484 | AGGAACTTGC GGCGC |
| AR | ENSG00000240053 | 265 | 279 + | 0.000484 | TAGGACTGCGTGTGA  |
| AR | ENSG00000172819 | 147 | 161 - | 0.000487 | AGGCAGAGGGTGTGT  |
| AR | ENSG00000204438 | 216 | 230 - | 0.000487 | CGGCACATGGGGTCT  |
| AR | ENSG00000177628 | 167 | 181 - | 0.00049  | CGGGACTCAGAGCCC  |
| AR | ENSG00000151743 | 90  | 104 + | 0.00049  | AAGAACTACA ACTCC |
| AR | ENSG00000198211 | 237 | 251 + | 0.00049  | AAGAACTGTGGGGAC  |
| AR | ENSG00000167608 | 287 | 301 - | 0.00049  | AGGCAGACACTGCCC  |
| AR | ENSG00000115504 | 316 | 330 + | 0.00049  | TAGGACACAAGGTTA  |
| AR | ENSG00000157851 | 317 | 331 - | 0.00049  | GAGA ACTCACCGACC |
| AR | ENSG00000163870 | 122 | 136 + | 0.00049  | AGGGACACGGAGGGG  |
| AR | ENSG00000085274 | 148 | 162 - | 0.000492 | GGGCACAGTGGGCAT  |
| AR | ENSG00000250656 | 248 | 262 - | 0.000492 | AGGAAGATGAAGAGC  |
| AR | ENSG00000202441 | 36  | 50 +  | 0.000492 | AGGCACACAGACACA  |
| AR | ENSG00000106069 | 129 | 143 + | 0.000492 | AGGCACAGGGACCTT  |
| AR | ENSG00000172728 | 336 | 350 - | 0.000492 | AAGAACACCGGGCCG  |
| AR | ENSG00000076321 | 318 | 332 + | 0.000495 | GAGAAGAAAGTGTCA  |
| AR | ENSG00000074582 | 317 | 331 + | 0.000495 | AGGAAGAGAAAGGAC  |
| AR | ENSG00000136883 | 377 | 391 - | 0.000495 | TGGTACATCCTGATG  |
| AR | ENSG00000143093 | 20  | 34 +  | 0.000498 | GAGGACAAGAGGTCA  |
| AR | ENSG00000215695 | 292 | 306 - | 0.000498 | AAGCAGAGACAGAGC  |
| AR | ENSG00000228703 | 155 | 169 + | 0.000498 | CGGGACAGGTACTCC  |
| AR | ENSG00000257613 | 196 | 210 + | 0.000498 | AAGAACTGTCACTAT  |
| AR | ENSG00000172209 | 261 | 275 - | 0.000498 | GAGGAAAGCCTGTTC  |
| AR | ENSG00000139116 | 352 | 366 - | 0.000501 | GGGGACAAAGCGCGC  |
| AR | ENSG00000252974 | 78  | 92 -  | 0.000501 | GGGGACAAAGCGCGC  |
| AR | ENSG00000258017 | 248 | 262 + | 0.000501 | AGGTACACATGGAAA  |
| AR | ENSG00000134864 | 284 | 298 - | 0.000501 | GAGAACATTTTCCT   |
| AR | ENSG00000161970 | 63  | 77 -  | 0.000501 | GGGAACTGCGAGGGA  |

|    |                 |     |       |          |                   |
|----|-----------------|-----|-------|----------|-------------------|
| AR | ENSG00000167741 | 303 | 317 - | 0.000501 | TAGGACACAAGGCC    |
| AR | ENSG00000203896 | 256 | 270 + | 0.000501 | CGGGACATCAGGAGC   |
| AR | ENSG00000251003 | 340 | 354 - | 0.000501 | AAGTACTTACTCTTT   |
| AR | ENSG00000227200 | 309 | 323 - | 0.000501 | TGGAACATGGAGAAG   |
| AR | ENSG00000204859 | 81  | 95 +  | 0.000504 | AAGAACAGGGCGAGG   |
| AR | ENSG00000110075 | 16  | 30 +  | 0.000504 | GGGAAAAGAATGCGC   |
| AR | ENSG00000136044 | 313 | 327 + | 0.000504 | GGGCACGGAGTGGCC   |
| AR | ENSG00000255526 | 23  | 37 +  | 0.000504 | AGGGACTCTCAGAAT   |
| AR | ENSG00000167635 | 200 | 214 + | 0.000504 | CAGGACTCCCAGACC   |
| AR | ENSG00000100234 | 352 | 366 + | 0.000504 | GGGCACTCGGAGGGC   |
| AR | ENSG00000237765 | 283 | 297 - | 0.000504 | AAGAACTGGATCGGC   |
| AR | ENSG00000249494 | 211 | 225 + | 0.000504 | GAGAACGCCGTGCGT   |
| AR | ENSG00000124802 | 208 | 222 - | 0.000504 | CAGAACAAGAACCTC   |
| AR | ENSG00000215791 | 21  | 35 +  | 0.000507 | GGGCACAGGAGGCGT   |
| AR | ENSG00000110013 | 133 | 147 + | 0.000507 | GGGAACACTGGCTTT   |
| AR | ENSG00000132010 | 156 | 170 - | 0.000507 | CAGAACTGAGTGACG   |
| AR | ENSG00000138433 | 16  | 30 -  | 0.000507 | CGGCACTGCTTGACC   |
| AR | ENSG00000089101 | 147 | 161 + | 0.000507 | CGGAACTTGCAGGAC   |
| AR | ENSG00000214597 | 151 | 165 + | 0.000507 | CAGAACTTCTAGAAC   |
| AR | ENSG00000253773 | 44  | 58 +  | 0.000507 | AAGAACAGGCCGAGG   |
| AR | ENSG00000213782 | 186 | 200 + | 0.000501 | GAGAACTAAAACACTAC |
| AR | ENSG00000226352 | 40  | 54 -  | 0.000513 | CAGTACAAGCGGAAC   |
| AR | ENSG00000080823 | 162 | 176 + | 0.000513 | GGGGACGGGCTGCAC   |
| AR | ENSG00000170144 | 103 | 117 - | 0.000513 | GGGAACGCCTTGTGA   |
| AR | ENSG00000159082 | 378 | 392 - | 0.000513 | AGGCAGAGACTGGTC   |
| AR | ENSG00000008988 | 291 | 305 + | 0.000513 | AGGAACAAGTCGGTC   |
| AR | ENSG00000148296 | 91  | 105 + | 0.000513 | AAGGACGGAATGAAT   |
| AR | ENSG00000249115 | 77  | 91 +  | 0.000516 | GGGAAGAGTGAGCGC   |
| AR | ENSG00000068724 | 384 | 398 - | 0.000516 | GGGGACAGCGGCTGC   |
| AR | ENSG00000214753 | 84  | 98 +  | 0.000519 | AGGAACTCCGTCGTC   |
| AR | ENSG00000089022 | 45  | 59 -  | 0.000519 | AAGCACTGAAAGGGT   |
| AR | ENSG00000213398 | 129 | 143 - | 0.000519 | AGGGACGGCCTGGCC   |
| AR | ENSG00000204314 | 226 | 240 - | 0.000519 | AGGAAGATCCTGGAC   |
| AR | ENSG00000214300 | 289 | 303 - | 0.000519 | CAGAAGAGTGTGTTA   |
| AR | ENSG00000244697 | 322 | 336 + | 0.000519 | CAGAAGAGTGTGTTA   |
| AR | ENSG00000173988 | 266 | 280 + | 0.000522 | GGGAACAGCCTCCTG   |
| AR | ENSG00000224189 | 103 | 117 - | 0.000522 | CAGTACGCGCAGTGC   |
| AR | ENSG00000237298 | 232 | 246 - | 0.000522 | AGGGACATAATCCAA   |
| AR | ENSG00000145592 | 134 | 148 - | 0.000522 | CGGGACTCCCAGTTT   |
| AR | ENSG00000233927 | 354 | 368 - | 0.000525 | CGGAACTGGGCGTCC   |
| AR | ENSG00000102882 | 234 | 248 + | 0.000528 | GAGGACAGTCTCCGA   |
| AR | ENSG00000152348 | 342 | 356 - | 0.000528 | CGGAACTGAATGATG   |
| AR | ENSG00000187109 | 24  | 38 +  | 0.000531 | AGGAAAAAACTGTTT   |
| AR | ENSG00000006740 | 109 | 123 - | 0.000531 | GAGAACGCCGTGCAT   |
| AR | ENSG00000254501 | 351 | 365 + | 0.000534 | GGGCACAGGGTCTGG   |
| AR | ENSG00000258168 | 367 | 381 + | 0.000534 | AAGGACAAGAACCCC   |
| AR | ENSG00000258232 | 309 | 323 + | 0.000534 | CAGCACTATCTGCTC   |
| AR | ENSG00000100568 | 172 | 186 - | 0.000534 | CGGGACTGGCAGCGC   |
| AR | ENSG00000137877 | 283 | 297 - | 0.000534 | AGGGACATCAGGAGA   |
| AR | ENSG00000222345 | 139 | 153 - | 0.000534 | AAGAACTTTTAGAAA   |

|    |                 |     |       |          |                  |
|----|-----------------|-----|-------|----------|------------------|
| AR | ENSG00000167100 | 335 | 349 - | 0.000538 | GGGAACAGGTTTCGCT |
| AR | ENSG00000114126 | 199 | 213 - | 0.000538 | CAGCACAGTGC GCGC |
| AR | ENSG00000221267 | 169 | 183 + | 0.000538 | CAGCACAACCAGCCA  |
| AR | ENSG00000023171 | 162 | 176 - | 0.000541 | AAGCACTGCCAGCCA  |
| AR | ENSG00000144401 | 195 | 209 - | 0.000541 | AAGCACAGTGGGGGA  |
| AR | ENSG00000215298 | 205 | 219 - | 0.000541 | AGGCACATGAAGGTG  |
| AR | ENSG00000256329 | 30  | 44 +  | 0.000541 | AAGAAGATACTCTGC  |
| AR | ENSG00000254400 | 324 | 338 + | 0.000544 | CGGCACTGAGTGAAA  |
| AR | ENSG00000185633 | 37  | 51 -  | 0.000544 | GGGCACAGACACACA  |
| AR | ENSG00000245750 | 344 | 358 - | 0.000544 | GGGAACGGCTAGAAC  |
| AR | ENSG00000248245 | 84  | 98 +  | 0.000544 | AGGGACAAGA ACTAT |
| AR | ENSG00000160844 | 137 | 151 - | 0.000544 | CAGGACTTGTAGTCC  |
| AR | ENSG00000147804 | 340 | 354 - | 0.000544 | CAGCACAGCCAGAAG  |
| AR | ENSG00000229127 | 274 | 288 - | 0.000547 | TAGGACATCTGGTCC  |
| AR | ENSG00000234353 | 147 | 161 - | 0.000547 | CAGGACATTGGGTCA  |
| AR | ENSG00000241853 | 331 | 345 + | 0.000547 | GGGCACTCAGAGAGA  |
| AR | ENSG00000147642 | 383 | 397 - | 0.000547 | GAGGACAAAATGGAG  |
| AR | ENSG00000119396 | 110 | 124 - | 0.000547 | AGGGACATATAGCCG  |
| AR | ENSG00000232739 | 181 | 195 - | 0.00055  | CAGAACATCGACATT  |
| AR | ENSG00000023191 | 302 | 316 - | 0.00055  | CAGAACGGGTTGAAC  |
| AR | ENSG00000129535 | 63  | 77 +  | 0.00055  | TAGGACTCAAAGACC  |
| AR | ENSG00000258571 | 199 | 213 + | 0.00055  | AGGAAAACAGAGAAC  |
| AR | ENSG00000163590 | 276 | 290 - | 0.00055  | GGGTACGCAGAGCCC  |
| AR | ENSG00000113231 | 83  | 97 +  | 0.00055  | GGGCACGCTCTGCC   |
| AR | ENSG00000223501 | 211 | 225 + | 0.00055  | AGGAAGAGGCGGTGC  |
| AR | ENSG00000231500 | 214 | 228 - | 0.00055  | AGGAAGAGGCGGTGC  |
| AR | ENSG00000160710 | 349 | 363 - | 0.000556 | AAGGACAGAGGCTCT  |
| AR | ENSG00000148814 | 360 | 374 + | 0.000556 | GGGTACGGCCAGCTC  |
| AR | ENSG00000136143 | 223 | 237 + | 0.000556 | AAGCACGGCGTGAGT  |
| AR | ENSG00000258930 | 96  | 110 - | 0.000556 | AAGAAGAGAGAGAGA  |
| AR | ENSG00000211535 | 278 | 292 + | 0.000556 | TGGGACAGAGGGGGC  |
| AR | ENSG00000112079 | 334 | 348 - | 0.000556 | AGGGACTCTGAGACA  |
| AR | ENSG00000094880 | 233 | 247 - | 0.00056  | AGGTACTCGCAGCCA  |
| AR | ENSG00000145868 | 10  | 24 -  | 0.000563 | AAGCACTGAGTCTGA  |
| AR | ENSG00000111669 | 11  | 25 -  | 0.000566 | AGGAACTGCAGGGAC  |
| AR | ENSG00000167553 | 49  | 63 +  | 0.000566 | GAGAACAACGCGAGA  |
| AR | ENSG00000100605 | 357 | 371 + | 0.000566 | GGGTACAGAGACGTT  |
| AR | ENSG00000174527 | 374 | 388 + | 0.000569 | GAGA ACTGGGCGTGT |
| AR | ENSG00000128645 | 357 | 371 - | 0.000569 | GGGCAGAGGCTGAGC  |
| AR | ENSG00000125848 | 263 | 277 + | 0.000569 | CAGGACAAGCTCAGC  |
| AR | ENSG00000169184 | 312 | 326 + | 0.000569 | GAGAACAGAAGCGGC  |
| AR | ENSG00000185666 | 188 | 202 + | 0.000569 | GGGCAGAGGCTGAGC  |
| AR | ENSG00000251131 | 26  | 40 -  | 0.000569 | GGGAACGCCGGGTGC  |
| AR | ENSG00000128590 | 22  | 36 +  | 0.000569 | GAGGACTCACTGGCA  |
| AR | ENSG00000250234 | 12  | 26 -  | 0.000576 | CAGCACAGCGTGGAG  |
| AR | ENSG00000250869 | 147 | 161 - | 0.000576 | GGGAAAAGAGAGACC  |
| AR | ENSG00000243341 | 208 | 222 + | 0.000579 | GAGAAGAAGCTGCC   |
| AR | ENSG00000235939 | 40  | 54 -  | 0.000582 | CAGAACGGGAAGTTA  |
| AR | ENSG00000222383 | 216 | 230 - | 0.000582 | TAGCACATTCAGGGT  |
| AR | ENSG00000234062 | 359 | 373 - | 0.000582 | GGGAACACACATG    |



|    |                 |     |       |          |                  |
|----|-----------------|-----|-------|----------|------------------|
| AR | ENSG00000186815 | 79  | 93 +  | 0.000585 | AAGGACAGAGGGCTG  |
| AR | ENSG00000168807 | 371 | 385 + | 0.000585 | GGGGAGAGCCTGAGC  |
| AR | ENSG00000138385 | 229 | 243 + | 0.000585 | AAGAACGTTCAGAAT  |
| AR | ENSG00000128335 | 265 | 279 - | 0.000585 | GGGCACAGCAGGTGG  |
| AR | ENSG00000112339 | 144 | 158 + | 0.000585 | AAGAACAGGTGCCTC  |
| AR | ENSG00000224011 | 387 | 401 + | 0.000589 | AAGAAGACTGTGCTA  |
| AR | ENSG00000256929 | 32  | 46 -  | 0.000589 | GGGAAGAATCTGTAT  |
| AR | ENSG00000162441 | 44  | 58 +  | 0.000592 | TAGGACAAAAAGCGA  |
| AR | ENSG00000216642 | 334 | 348 + | 0.000592 | GGGCACTCAAAGAGA  |
| AR | ENSG00000117122 | 41  | 55 +  | 0.000595 | AGGCAGAGGGGAGATC |
| AR | ENSG00000078304 | 169 | 183 - | 0.000595 | GGGGACTGAGTCTTT  |
| AR | ENSG00000151445 | 270 | 284 + | 0.000595 | AGGAAAACAAAGAAC  |
| AR | ENSG00000162746 | 160 | 174 + | 0.000599 | GGGGACTCTCAGAGT  |
| AR | ENSG00000234650 | 159 | 173 - | 0.000599 | AAGGACTTCATGGCT  |
| AR | ENSG00000066583 | 211 | 225 + | 0.000599 | GGGAACATGGCGGCT  |
| AR | ENSG00000254673 | 21  | 35 -  | 0.000599 | AAGCACAATTAGGAA  |
| AR | ENSG00000228501 | 210 | 224 + | 0.000602 | GAGTACATCCAGGAG  |
| AR | ENSG00000177981 | 214 | 228 + | 0.000605 | AAGCACAAAAGGCCA  |
| AR | ENSG00000225133 | 352 | 366 - | 0.000609 | AAGCACAGCACCTAC  |
| AR | ENSG00000173585 | 314 | 328 - | 0.000609 | TGGGACAGCAGGCAC  |
| AR | ENSG00000137101 | 371 | 385 - | 0.000609 | CGGAAAACAAAGTTC  |
| AR | ENSG00000242219 | 42  | 56 -  | 0.000609 | TAGCACAAAAGGTTT  |
| AR | ENSG00000225251 | 84  | 98 -  | 0.000612 | CAGGACTTGTTGTTT  |
| AR | ENSG00000072210 | 302 | 316 + | 0.000616 | AGGGACTAGCTCTCC  |
| AR | ENSG00000214283 | 132 | 146 + | 0.000616 | GGGAACTGAAACCAC  |
| AR | ENSG00000164465 | 160 | 174 - | 0.000616 | TAGAAGAGAATGCAC  |
| AR | ENSG00000241279 | 294 | 308 - | 0.000616 | AAGCACATACACCGA  |
| AR | ENSG00000118849 | 178 | 192 - | 0.000619 | GGGGACAATGGGGAC  |
| AR | ENSG00000196542 | 143 | 157 - | 0.000619 | GAGGAGACACTGCAC  |
| AR | ENSG00000132849 | 317 | 331 - | 0.000622 | GGGGACACCCAGGGG  |
| AR | ENSG00000234134 | 110 | 124 - | 0.000622 | CAGAACTGTTTGCCA  |
| AR | ENSG00000139974 | 337 | 351 + | 0.000622 | TGGAAGTGGTAGTCA  |
| AR | ENSG00000147650 | 378 | 392 - | 0.000622 | AGGAAAAGCAAGAGC  |
| AR | ENSG00000177182 | 257 | 271 - | 0.000622 | TGGAACAATGAGACG  |
| AR | ENSG00000226800 | 298 | 312 + | 0.000626 | GAGGACAGAGGGATG  |
| AR | ENSG00000021762 | 71  | 85 -  | 0.000629 | AAGAAAACAAAGCCC  |
| AR | ENSG00000242257 | 96  | 110 + | 0.000629 | AGGCACTGGATCTTT  |
| AR | ENSG00000230798 | 364 | 378 - | 0.000633 | CGGCACTGGGGGTTT  |
| AR | ENSG00000134824 | 18  | 32 +  | 0.000633 | AGGGACTGGTTGCCA  |
| AR | ENSG00000172375 | 65  | 79 +  | 0.000633 | AAGAACGGATACTTC  |
| AR | ENSG00000108797 | 247 | 261 + | 0.000633 | GAGGAGAGACAGAGC  |
| AR | ENSG00000131759 | 9   | 23 -  | 0.000633 | GGGGACAGGAACAGT  |
| AR | ENSG00000074416 | 87  | 101 + | 0.000633 | GGGCACACGTGGGCC  |
| AR | ENSG00000248710 | 375 | 389 + | 0.000633 | TAGCACAGTCTGGTG  |
| AR | ENSG00000054148 | 290 | 304 - | 0.000633 | CGGTACAAGGAGGCA  |
| AR | ENSG00000231887 | 317 | 331 + | 0.000636 | GGGAAGATATTGTGA  |
| AR | ENSG00000258813 | 36  | 50 -  | 0.000636 | GGGAAGAGATTGGAC  |
| AR | ENSG00000253172 | 375 | 389 + | 0.000636 | GAGAACAGTGGGGTG  |
| AR | ENSG00000126522 | 369 | 383 + | 0.000636 | CAGAACTCGGAGCCA  |
| AR | ENSG00000103037 | 305 | 319 - | 0.00064  | AGGAAAAGGCTGGAC  |

|    |                 |     |       |          |                  |
|----|-----------------|-----|-------|----------|------------------|
| AR | ENSG00000234185 | 136 | 150 - | 0.00064  | AAGGACTTCCTGGGA  |
| AR | ENSG00000123358 | 138 | 152 - | 0.000643 | AAGAAGACACAGCCT  |
| AR | ENSG00000177192 | 179 | 193 - | 0.000643 | GAGAAGAGGCAGGGC  |
| AR | ENSG00000083454 | 229 | 243 + | 0.000643 | CAGCACAGGGCGGTC  |
| AR | ENSG00000206535 | 136 | 150 - | 0.000643 | AAGGACGCCAGGTC   |
| AR | ENSG00000257076 | 238 | 252 - | 0.000643 | AAGCACTACTAGTCT  |
| AR | ENSG00000164053 | 77  | 91 -  | 0.000647 | AAGGACTCAGTGCGG  |
| AR | ENSG00000218014 | 230 | 244 - | 0.000647 | AAGGACTACTTGCC   |
| AR | ENSG00000065328 | 142 | 156 - | 0.00065  | CAGCACTGACTGGCT  |
| AR | ENSG00000065970 | 253 | 267 - | 0.00065  | GGCAGACAGTGCA    |
| AR | ENSG00000108298 | 312 | 326 + | 0.00065  | AGGGACTGTCTGGTCT |
| AR | ENSG00000189050 | 298 | 312 - | 0.00065  | AAGAACAGCGGCATA  |
| AR | ENSG00000198925 | 366 | 380 - | 0.00065  | AGGAACAGCGACCCG  |
| AR | ENSG00000113758 | 44  | 58 -  | 0.00065  | AAGCACAGAACGGGA  |
| AR | ENSG00000226059 | 345 | 359 + | 0.00065  | TGGAAGACAATGTCT  |
| AR | ENSG00000116750 | 327 | 341 - | 0.000654 | AGGGACATCCTCGCT  |
| AR | ENSG00000162643 | 47  | 61 +  | 0.000654 | GAGCACACAACCTGC  |
| AR | ENSG00000233589 | 270 | 284 + | 0.000654 | GGGTACTTGAAGAAT  |
| AR | ENSG00000251186 | 89  | 103 + | 0.000654 | AGGGAGAGACAGCAC  |
| AR | ENSG00000155508 | 202 | 216 + | 0.000654 | GAGAACACGAGGCGG  |
| AR | ENSG00000084234 | 99  | 113 - | 0.000657 | TGGAAGAGCCTGCTC  |
| AR | ENSG00000215039 | 299 | 313 - | 0.000661 | AGGGAGAGTGAGACC  |
| AR | ENSG00000164404 | 87  | 101 + | 0.000661 | CAGAACATTGGGGAT  |
| AR | ENSG00000225951 | 262 | 276 + | 0.000661 | AGGCACTCCTTCTCC  |
| AR | ENSG00000225733 | 104 | 118 - | 0.000664 | CGGAAGAGGGTGCTC  |
| AR | ENSG00000242583 | 124 | 138 + | 0.000664 | GGGGACATCGGCTCC  |
| AR | ENSG00000159899 | 207 | 221 - | 0.000664 | GAGAACGGGGTGGA   |
| AR | ENSG00000251821 | 213 | 227 + | 0.000668 | GAGCACATATACTAA  |
| AR | ENSG00000004766 | 109 | 123 - | 0.000668 | AGGGACTACATCTCC  |
| AR | ENSG00000148634 | 262 | 276 - | 0.000672 | GGGAAGAGACTGGGT  |
| AR | ENSG00000258657 | 89  | 103 - | 0.000672 | GGGCACAGTTGGAAT  |
| AR | ENSG00000244676 | 359 | 373 + | 0.000672 | AAGAACTCTAACTGA  |
| AR | ENSG00000172113 | 29  | 43 -  | 0.000672 | AAGTACGCGGAGGGC  |
| AR | ENSG00000242683 | 308 | 322 + | 0.000672 | CAGAAGATAGAGACC  |
| AR | ENSG00000253485 | 167 | 181 + | 0.000672 | CAGAACTAAGAGAAA  |
| AR | ENSG00000176973 | 33  | 47 +  | 0.000675 | AGGTACTCAGACACC  |
| AR | ENSG00000167548 | 25  | 39 +  | 0.000675 | TAGGACTGAGAGGCC  |
| AR | ENSG00000172936 | 52  | 66 +  | 0.000675 | AAGAACTGTGGCTCC  |
| AR | ENSG00000078140 | 363 | 377 - | 0.000675 | GAGCACACGAACACT  |
| AR | ENSG00000248636 | 155 | 169 + | 0.000683 | CAGGACACCACGCC   |
| AR | ENSG00000255185 | 4   | 18 +  | 0.000683 | TAGTACTTTGTGATT  |
| AR | ENSG00000241635 | 189 | 203 - | 0.000683 | AAGAACTACAGGCAC  |
| AR | ENSG00000041802 | 9   | 23 -  | 0.000683 | CAGCACAGCAACTAA  |
| AR | ENSG00000166526 | 99  | 113 + | 0.000683 | CAGGACACGGTCACT  |
| AR | ENSG00000110536 | 1   | 15 -  | 0.000686 | TGGAACTGTGACTCC  |
| AR | ENSG00000182944 | 157 | 171 - | 0.000686 | AGGGAGACGGAGATC  |
| AR | ENSG00000024048 | 275 | 289 - | 0.000686 | AAGGACAGCGGCCTC  |
| AR | ENSG00000233202 | 119 | 133 - | 0.000686 | AAGTAAACGCTGAGC  |
| AR | ENSG00000255692 | 316 | 330 + | 0.00069  | CAGAACATTACACA   |
| AR | ENSG00000175344 | 31  | 45 -  | 0.00069  | AGGTACTCCCGGCGC  |

|    |                 |     |       |          |                 |
|----|-----------------|-----|-------|----------|-----------------|
| AR | ENSG00000206053 | 251 | 265 - | 0.00069  | TGGAACATGTGACC  |
| AR | ENSG00000237953 | 227 | 241 + | 0.00069  | AAGTACGTTTTGTGA |
| AR | ENSG00000157107 | 105 | 119 + | 0.00069  | GGGGACAGGGCGCAT |
| AR | ENSG00000244307 | 257 | 271 - | 0.00069  | CAGAACTCCTAGATT |
| AR | ENSG00000143353 | 67  | 81 +  | 0.000694 | CAGTACAGTTACAAC |
| AR | ENSG00000129472 | 207 | 221 + | 0.000694 | GAGAAGAAGAAGATC |
| AR | ENSG00000229920 | 303 | 317 - | 0.000694 | AGGTACTTTCTCAAC |
| AR | ENSG00000064787 | 61  | 75 -  | 0.000694 | CAGAACACCACCTCC |
| AR | ENSG00000238278 | 130 | 144 - | 0.000694 | GAGGACTCAGAGGCT |
| AR | ENSG00000173210 | 74  | 88 +  | 0.000694 | CAGGACACAAGGCCT |
| AR | ENSG00000055609 | 229 | 243 - | 0.000694 | CAGGACACGCACTCA |
| AR | ENSG00000208038 | 184 | 198 + | 0.000697 | GGGCACAGGCCCTCC |
| AR | ENSG00000198417 | 275 | 289 + | 0.000697 | AGGCACAAAGCGCCT |
| AR | ENSG00000196455 | 67  | 81 -  | 0.000697 | GAGAAAATGATGCTC |
| AR | ENSG00000186792 | 206 | 220 + | 0.000701 | GGGTAGAGACTGAGT |
| AR | ENSG00000013810 | 107 | 121 + | 0.000701 | AGGCACAGTTCCCA  |
| AR | ENSG00000116783 | 372 | 386 - | 0.000705 | GGGAAGTGACAGTCC |
| AR | ENSG00000174564 | 223 | 237 + | 0.000705 | GAGGACATGAAGGGG |
| AR | ENSG00000105778 | 366 | 380 - | 0.000705 | CAGCACATGAGGGCC |
| AR | ENSG00000182473 | 294 | 308 + | 0.000709 | CGGCACAGCCACGTC |
| AR | ENSG00000171497 | 72  | 86 +  | 0.000709 | AGGAACAGGTGGCGG |
| AR | ENSG00000136108 | 96  | 110 - | 0.000712 | TGGGACTGAGTCTGC |
| AR | ENSG00000126351 | 208 | 222 + | 0.000712 | CAGCACAAGAGAAG  |
| AR | ENSG00000164414 | 357 | 371 + | 0.000712 | TAGGACAAAGAGGCA |
| AR | ENSG00000225920 | 122 | 136 + | 0.000716 | AGGAACACTACCCCC |
| AR | ENSG00000161642 | 82  | 96 -  | 0.000716 | GGGCACTCAGGGCTC |
| AR | ENSG00000168883 | 98  | 112 + | 0.000716 | CGGGACGTGGAGTCC |
| AR | ENSG00000151093 | 329 | 343 - | 0.000716 | GAGAAAAGGAAGTTT |
| AR | ENSG00000219790 | 241 | 255 - | 0.000716 | TGGGACATTCAGGGA |
| AR | ENSG00000256650 | 175 | 189 - | 0.00072  | AGGTACATGCACTAG |
| AR | ENSG00000223442 | 60  | 74 +  | 0.00072  | GGGAAATGGTGTCC  |
| AR | ENSG00000208892 | 219 | 233 + | 0.000724 | AGGGACTTTTTGTG  |
| AR | ENSG00000250299 | 248 | 262 - | 0.000724 | GGGGACAAAGGGTGG |
| AR | ENSG00000140525 | 161 | 175 + | 0.000724 | TGGTACACCCCGCCC |
| AR | ENSG00000164542 | 353 | 367 + | 0.000724 | GAGAAAAGTGAGTCT |
| AR | ENSG00000104529 | 268 | 282 + | 0.000724 | AGGCATTGTAGGCC  |
| AR | ENSG00000122986 | 162 | 176 - | 0.000727 | AGGTAAACTGTCA   |
| AR | ENSG00000258283 | 177 | 191 + | 0.000727 | AGGAAGACGATGCCA |
| AR | ENSG00000236449 | 174 | 188 + | 0.000727 | AGGGACTCTCAGGCT |
| AR | ENSG00000235374 | 86  | 100 + | 0.000727 | GAGGAGACTCTGCC  |
| AR | ENSG00000180385 | 21  | 35 +  | 0.000727 | GGGCACAGTTGCTTC |
| AR | ENSG00000171056 | 53  | 67 -  | 0.000727 | AGGGACTGAGGGGGC |
| AR | ENSG00000205268 | 311 | 325 + | 0.000727 | CAGAACACAAGGAAG |
| AR | ENSG00000254093 | 90  | 104 - | 0.000727 | AGGGACTGAGGGGGC |
| AR | ENSG00000228932 | 210 | 224 - | 0.000727 | GGGGAGATGCTGTTT |
| AR | ENSG00000173457 | 190 | 204 + | 0.000731 | AGGAAGAGCGAGACA |
| AR | ENSG00000256028 | 29  | 43 +  | 0.000731 | GGGAACTTAGAGCGG |
| AR | ENSG00000003509 | 304 | 318 - | 0.000731 | CGGCACACAACGGCC |
| AR | ENSG00000115816 | 166 | 180 + | 0.000731 | CGGCACACAACGGCC |
| AR | ENSG00000125991 | 221 | 235 + | 0.000731 | CGGAAGAGGGAGTCT |

|    |                 |     |       |          |                  |
|----|-----------------|-----|-------|----------|------------------|
| AR | ENSG00000113282 | 214 | 228 - | 0.000731 | CAGCACAGGCGCTGC  |
| AR | ENSG00000197071 | 32  | 46 -  | 0.000731 | AAGAACTGCAGCTGC  |
| AR | ENSG00000246889 | 23  | 37 +  | 0.000735 | GGGAAGAAGCAGAGC  |
| AR | ENSG00000175197 | 222 | 236 + | 0.000735 | AGGCACTGAGCGTAT  |
| AR | ENSG00000240216 | 256 | 270 - | 0.000735 | GGGACTAAATGGTT   |
| AR | ENSG00000143379 | 139 | 153 - | 0.000739 | GAGAAGAGACTGGCA  |
| AR | ENSG00000231882 | 240 | 254 + | 0.000739 | TGGACAATCTCAGC   |
| AR | ENSG00000164466 | 230 | 244 + | 0.000739 | TGGACAATCTCAGC   |
| AR | ENSG00000152061 | 303 | 317 - | 0.000743 | GGGAACTGAGAGGGG  |
| AR | ENSG00000175224 | 377 | 391 + | 0.00075  | GAGGACTAAAAGAAT  |
| AR | ENSG00000214188 | 355 | 369 + | 0.00075  | CGGAACTCCGAGGGT  |
| AR | ENSG00000115415 | 298 | 312 + | 0.000754 | CAGGACAAGATCTGA  |
| AR | ENSG00000145819 | 371 | 385 + | 0.000754 | CGGAACAGCAGCACC  |
| AR | ENSG00000147316 | 302 | 316 + | 0.000754 | AGGTACTTCTCTGCTG |
| AR | ENSG00000159214 | 295 | 309 - | 0.000758 | AAGCACTTTGGGCTC  |
| AR | ENSG00000255773 | 317 | 331 - | 0.000758 | CAGGACAGCAGGCCT  |
| AR | ENSG00000143375 | 37  | 51 +  | 0.000762 | GAGAACAAAATCCGG  |
| AR | ENSG00000100442 | 378 | 392 - | 0.000762 | CAGTACACGAGGAAA  |
| AR | ENSG00000100600 | 47  | 61 -  | 0.000762 | AGGTACTTGAGGTCT  |
| AR | ENSG00000100926 | 124 | 138 + | 0.000762 | GAGGACGGATTGGGC  |
| AR | ENSG00000007384 | 123 | 137 - | 0.000762 | CAGAACATCTGGAGA  |
| AR | ENSG00000123388 | 178 | 192 - | 0.000766 | AAGTAGATATTGTCA  |
| AR | ENSG00000256804 | 94  | 108 + | 0.000766 | GGGTACAGCGGCCTC  |
| AR | ENSG00000152082 | 260 | 274 + | 0.000766 | AGGTACTTTCTCCCC  |
| AR | ENSG00000147687 | 274 | 288 - | 0.000766 | AAGGACTTCGGGAAC  |
| AR | ENSG00000172590 | 244 | 258 - | 0.00077  | GAGAACAGTCCCTAA  |
| AR | ENSG00000145040 | 355 | 369 + | 0.00077  | GGGACTCTGGGATC   |
| AR | ENSG00000240758 | 267 | 281 - | 0.00077  | GGGAACAGCCGGGAG  |
| AR | ENSG00000239737 | 152 | 166 + | 0.00077  | AGGTAGATGCAGCTC  |
| AR | ENSG00000188818 | 294 | 308 + | 0.000774 | GGGCACTGGGTCTCT  |
| AR | ENSG00000223969 | 327 | 341 - | 0.000774 | CGGTACTTCGGGTCC  |
| AR | ENSG00000148303 | 27  | 41 -  | 0.000774 | GGGAAGAGAGACTGC  |
| AR | ENSG00000076258 | 87  | 101 - | 0.000778 | CAGAACATAAACGCT  |
| AR | ENSG00000154134 | 238 | 252 - | 0.000778 | GGGTACGGTTCGGTGC |
| AR | ENSG00000231125 | 69  | 83 +  | 0.000778 | AGGAAAATGGAGTCT  |
| AR | ENSG00000109689 | 314 | 328 + | 0.000778 | GAGAAGAGGGGAGATA |
| AR | ENSG00000250697 | 328 | 342 - | 0.000778 | GAGCACACCAACAGA  |
| AR | ENSG00000234141 | 386 | 400 - | 0.000778 | GGGAAGAGAAAGAGA  |
| AR | ENSG00000186106 | 182 | 196 + | 0.000778 | GGGACTCCGACTAC   |
| AR | ENSG00000152457 | 140 | 154 + | 0.000782 | CAGAAGAGAGAGGGC  |
| AR | ENSG00000164742 | 248 | 262 + | 0.000782 | AGGTACTCGAGGTCA  |
| AR | ENSG00000214050 | 260 | 274 + | 0.000782 | GAGAAAAAGCTGACC  |
| AR | ENSG00000197620 | 380 | 394 - | 0.000782 | CGGGACTGACAGAAA  |
| AR | ENSG00000158859 | 289 | 303 + | 0.000786 | AGGCAGAGACAGGGC  |
| AR | ENSG00000227802 | 255 | 269 - | 0.000786 | TGGCACAGCGAGCGG  |
| AR | ENSG00000088833 | 349 | 363 - | 0.000786 | GAGAAGAGTCAGCTT  |
| AR | ENSG00000121716 | 352 | 366 - | 0.000786 | CAGTACATGCAGGTG  |
| AR | ENSG00000214014 | 321 | 335 + | 0.000786 | TGGCACAGGCACTGA  |
| AR | ENSG00000162458 | 296 | 310 + | 0.00079  | TGGAACAGGTGGCCT  |
| AR | ENSG00000167491 | 86  | 100 - | 0.00079  | CAGGACTCCCAGGAC  |

|    |                 |     |       |          |                 |
|----|-----------------|-----|-------|----------|-----------------|
| AR | ENSG00000254901 | 378 | 392 + | 0.00079  | AGGAAAAGGGGGTTC |
| AR | ENSG00000122432 | 170 | 184 - | 0.000794 | TGGAACAGAGGGCTG |
| AR | ENSG0000020577  | 162 | 176 + | 0.000794 | AGGAACTCGGGCTGC |
| AR | ENSG00000124208 | 213 | 227 + | 0.000794 | GAGAACTGGCCGGGC |
| AR | ENSG00000250963 | 150 | 164 - | 0.000794 | GAGTACTGCCTGCAG |
| AR | ENSG00000129084 | 292 | 306 + | 0.000798 | CGGGACTGAAAGAGA |
| AR | ENSG00000258034 | 380 | 394 + | 0.000798 | CAGGACAGAGCGTTG |
| AR | ENSG00000171723 | 330 | 344 + | 0.000798 | AGGCACTGACTGGAG |
| AR | ENSG00000164808 | 40  | 54 -  | 0.000798 | GAGTAAAGTCTGTGT |
| AR | ENSG00000143321 | 335 | 349 + | 0.000802 | AGGTACTTGAGGTTA |
| AR | ENSG00000110851 | 77  | 91 +  | 0.000802 | AGGAACAGCAGCCCT |
| AR | ENSG00000171345 | 291 | 305 - | 0.000802 | AAGGACGACGTGGCC |
| AR | ENSG00000187514 | 245 | 259 + | 0.000802 | AGGGAGACTCAGTCT |
| AR | ENSG00000168028 | 199 | 213 + | 0.000802 | GAGTACATAAGGACG |
| AR | ENSG00000133872 | 222 | 236 - | 0.000802 | GAGCACAGCGCGGCT |
| AR | ENSG00000136492 | 113 | 127 + | 0.000806 | CGGGACTGGTTGATT |
| AR | ENSG00000255046 | 291 | 305 - | 0.000806 | AAGAAAACAAAGGCC |
| AR | ENSG00000227617 | 328 | 342 + | 0.00081  | GGGAAGAATTTGACC |
| AR | ENSG00000112655 | 243 | 257 + | 0.00081  | AGGTACTGGGCGCGC |
| AR | ENSG00000225839 | 267 | 281 + | 0.00081  | AGGCACAGTGGCTCA |
| AR | ENSG00000257918 | 192 | 206 - | 0.000814 | GAGTACACTGGCCTC |
| AR | ENSG00000173137 | 349 | 363 + | 0.000814 | GGGGACGGTGAGGTC |
| AR | ENSG00000158089 | 384 | 398 + | 0.000818 | GGGAAAATAAAGAAC |
| AR | ENSG00000196208 | 257 | 271 + | 0.000818 | AAGGACAGAGACCTG |
| AR | ENSG00000072121 | 307 | 321 - | 0.000822 | AGGGACGCTCTCTGC |
| AR | ENSG00000067601 | 281 | 295 + | 0.000822 | CGGTACATGCAGGTG |
| AR | ENSG00000129083 | 97  | 111 + | 0.000826 | AAGCACTTTCTCCCC |
| AR | ENSG00000258966 | 363 | 377 + | 0.000826 | CAGGACAGAGACCAT |
| AR | ENSG00000257534 | 159 | 173 - | 0.000831 | CAGCACAGCTCGTTA |
| AR | ENSG00000230870 | 134 | 148 + | 0.000831 | TGGAACTAACACTTC |
| AR | ENSG00000204209 | 306 | 320 - | 0.000835 | AGGAAGATAAAGAAA |
| AR | ENSG00000139637 | 203 | 217 - | 0.000839 | CGGAAGAGGAAGCGC |
| AR | ENSG00000225187 | 290 | 304 - | 0.000839 | GAGGACGGAGTGGCT |
| AR | ENSG00000233733 | 161 | 175 - | 0.000839 | AGGCAGAGAAAGGGC |
| AR | ENSG00000225673 | 233 | 247 + | 0.000839 | CAGAACACTCTCCTG |
| AR | ENSG00000130997 | 258 | 272 + | 0.000839 | CGGAACTTCTGAGG  |
| AR | ENSG00000010030 | 340 | 354 + | 0.000839 | GAGCACAGCCGCTCT |
| AR | ENSG00000149716 | 291 | 305 - | 0.000843 | AGGCACAAATGCTCC |
| AR | ENSG00000183426 | 18  | 32 +  | 0.000843 | GAGCACGTGATGGAC |
| AR | ENSG00000214274 | 364 | 378 - | 0.000847 | GAGCACTGCCTCCAC |
| AR | ENSG00000099337 | 227 | 241 + | 0.000847 | TGGAACTAGGTGCCA |
| AR | ENSG00000224680 | 374 | 388 + | 0.000852 | GAGGACGGTCTCTGC |
| AR | ENSG00000235910 | 381 | 395 - | 0.000852 | AAGGAGACAGAGGGC |
| AR | ENSG00000258051 | 26  | 40 +  | 0.000852 | AAGTAGACTGTGAGA |
| AR | ENSG00000222750 | 207 | 221 - | 0.000852 | CGGTACTGCCACTGC |
| AR | ENSG00000248487 | 222 | 236 - | 0.000852 | AGGTACTTAAGGGGC |
| AR | ENSG00000176076 | 53  | 67 -  | 0.000852 | GGGGACAGCTGGTGG |
| AR | ENSG00000151465 | 340 | 354 - | 0.000856 | AGGAAGACCGAGAAA |
| AR | ENSG00000118894 | 282 | 296 + | 0.000856 | GAGAACGCGGGGACC |
| AR | ENSG00000221025 | 184 | 198 - | 0.000856 | GGGCAGAGCCAGCTC |

|    |                 |     |       |          |                  |
|----|-----------------|-----|-------|----------|------------------|
| AR | ENSG00000168575 | 40  | 54 +  | 0.000856 | AGGGAGAAAATGTAA  |
| AR | ENSG00000102572 | 283 | 297 - | 0.00086  | GGGAAGAGAATGGAA  |
| AR | ENSG00000182909 | 364 | 378 - | 0.00086  | GGGAACTGGCAGCC   |
| AR | ENSG00000115239 | 51  | 65 -  | 0.00086  | GGGAACTCAAGCTCC  |
| AR | ENSG00000204264 | 97  | 111 + | 0.00086  | CAGAACAGTAGGCGG  |
| AR | ENSG00000153993 | 126 | 140 - | 0.00086  | TAGGACAGGCGGAGA  |
| AR | ENSG00000224437 | 289 | 303 - | 0.00086  | GGGGACACCACCTCC  |
| AR | ENSG00000185736 | 349 | 363 + | 0.000864 | GAGAACAATTTCGAGA |
| AR | ENSG00000134780 | 125 | 139 + | 0.000864 | AAGGACGCAGCGTCC  |
| AR | ENSG00000175773 | 277 | 291 - | 0.000869 | AAGGAGACGGAGTCA  |
| AR | ENSG00000171121 | 264 | 278 + | 0.000869 | TAGAACTGACCGCTC  |
| AR | ENSG00000135317 | 271 | 285 - | 0.000869 | AAGGACAGCCCCAGC  |
| AR | ENSG00000196126 | 75  | 89 +  | 0.000869 | AAGGAAATTCTGTTT  |
| AR | ENSG00000134905 | 309 | 323 + | 0.000873 | GGGGACAGCGTCAGG  |
| AR | ENSG00000154889 | 375 | 389 + | 0.000873 | AGGCACGGCCTGGCT  |
| AR | ENSG00000100142 | 209 | 223 + | 0.000873 | AGGAAAATAGTGCTA  |
| AR | ENSG00000145907 | 22  | 36 -  | 0.000873 | AGGCACTGGCGGGGC  |
| AR | ENSG00000258953 | 232 | 246 + | 0.000873 | CAGAAAACCTCTGTCT |
| AR | ENSG00000205231 | 236 | 250 - | 0.000877 | AGGCACAGAGGGGAG  |
| AR | ENSG00000103051 | 207 | 221 - | 0.000877 | CGGCACTTCCGGTCC  |
| AR | ENSG00000048828 | 232 | 246 + | 0.000877 | CAGCACATGGCGGCC  |
| AR | ENSG00000136842 | 188 | 202 + | 0.000877 | TGGAACACTAGTGTAG |
| AR | ENSG00000223787 | 183 | 197 - | 0.000882 | CAGCACTCTGTGGGT  |
| AR | ENSG00000241343 | 79  | 93 +  | 0.000882 | GGGGACGGGGAGGCC  |
| AR | ENSG00000111775 | 90  | 104 + | 0.000886 | AAGGACTCCGTCGTC  |
| AR | ENSG00000216324 | 163 | 177 + | 0.000886 | GAGAAAAACCTGTTA  |
| AR | ENSG00000215472 | 164 | 178 + | 0.00089  | AAGTACGTATTGACA  |
| AR | ENSG00000221656 | 360 | 374 - | 0.000895 | GGGCACATCCGGGGA  |
| AR | ENSG00000121753 | 158 | 172 - | 0.000899 | GAGGACTGTGGGTAA  |
| AR | ENSG00000134398 | 221 | 235 + | 0.000899 | GAGGACTCCAGGAAC  |
| AR | ENSG00000185513 | 158 | 172 - | 0.000899 | CAGGACGCAGAGCGC  |
| AR | ENSG00000185963 | 346 | 360 - | 0.000899 | TGGGACAGCCGCTTC  |
| AR | ENSG00000110011 | 72  | 86 +  | 0.000903 | AAGAACTGTGCCTCC  |
| AR | ENSG00000114395 | 182 | 196 - | 0.000903 | AGGAACGAGGAGCTA  |
| AR | ENSG00000241830 | 287 | 301 - | 0.000903 | AGGCACTACAACCTGC |
| AR | ENSG00000142937 | 34  | 48 +  | 0.000908 | CAGAACAGCTCCTAC  |
| AR | ENSG00000087470 | 154 | 168 + | 0.000908 | CAGAACTACAACCTCC |
| AR | ENSG00000136367 | 32  | 46 +  | 0.000908 | CGGAACTTCAGGTCT  |
| AR | ENSG00000241839 | 226 | 240 + | 0.000908 | CAGAACGCGGAGAGT  |
| AR | ENSG00000254531 | 170 | 184 - | 0.000908 | GGGGACAATGAGGAG  |
| AR | ENSG00000213397 | 336 | 350 + | 0.000908 | AAGCAGAGCAAGGTC  |
| AR | ENSG00000224489 | 250 | 264 + | 0.000908 | AGGTACTACCTCTCT  |
| AR | ENSG00000257755 | 234 | 248 + | 0.000908 | CAGCAGATCCAGTGC  |
| AR | ENSG00000116791 | 262 | 276 - | 0.000912 | TGGTAGAGCTTGTGC  |
| AR | ENSG00000162623 | 382 | 396 + | 0.000912 | TGGTAGAGCTTGTGC  |
| AR | ENSG00000255448 | 324 | 338 + | 0.000912 | GAGAAGATGAGGTAC  |
| AR | ENSG00000227973 | 259 | 273 - | 0.000912 | CAGCACTGTCACTCC  |
| AR | ENSG00000167397 | 218 | 232 + | 0.000912 | AAGTAGAGACTGGGA  |
| AR | ENSG00000171302 | 70  | 84 -  | 0.000912 | TGGCACATGAGGGCC  |
| AR | ENSG00000244097 | 162 | 176 + | 0.000912 | CGGAAGACAAAGGTC  |

|    |                 |     |       |          |                  |
|----|-----------------|-----|-------|----------|------------------|
| AR | ENSG00000253213 | 369 | 383 + | 0.000912 | AGGAAAAAGGAGAGC  |
| AR | ENSG00000253729 | 303 | 317 + | 0.000912 | CAGGAGACCTTGTC   |
| AR | ENSG00000065150 | 200 | 214 + | 0.000917 | CAGAACTGTGGGATT  |
| AR | ENSG00000166200 | 353 | 367 + | 0.000917 | TGGAACTCTGAGGGT  |
| AR | ENSG00000222019 | 298 | 312 + | 0.000917 | GGGCACGAGGTGGTC  |
| AR | ENSG00000083535 | 304 | 318 - | 0.000921 | GAGGACAGAACCAGC  |
| AR | ENSG00000196712 | 217 | 231 - | 0.000921 | GGGGAGAGGGAGCGC  |
| AR | ENSG00000241550 | 81  | 95 -  | 0.000921 | GAGTACTGGTTCTTT  |
| AR | ENSG00000201448 | 351 | 365 - | 0.000925 | AAGAAGAGGGTCTAT  |
| AR | ENSG00000236810 | 233 | 247 - | 0.000925 | TGGAACAGCAGCAGC  |
| AR | ENSG00000185278 | 229 | 243 - | 0.00093  | GGGAAGAAGGTGATA  |
| AR | ENSG00000235848 | 235 | 249 - | 0.00093  | TGGAAGATAAAGAGC  |
| AR | ENSG00000240695 | 222 | 236 + | 0.00093  | CGGGACTTCGTGTGG  |
| AR | ENSG00000243305 | 228 | 242 - | 0.00093  | CAGGACTATATGACT  |
| AR | ENSG00000008130 | 167 | 181 - | 0.000934 | GGGCACTGCCTGCAG  |
| AR | ENSG00000116213 | 9   | 23 +  | 0.000934 | GGGGACAGCAGGAGG  |
| AR | ENSG00000124920 | 298 | 312 + | 0.000934 | CGGGACATGGAGGTG  |
| AR | ENSG00000244926 | 218 | 232 + | 0.000934 | AAGAAAACATTGAGT  |
| AR | ENSG00000212496 | 90  | 104 - | 0.000934 | TAGTACAATTAGCAA  |
| AR | ENSG00000224884 | 242 | 256 - | 0.000934 | AAGAAGAAAGAGAAA  |
| AR | ENSG00000134970 | 47  | 61 +  | 0.000934 | AAGAAAAAGAAGAGC  |
| AR | ENSG00000102024 | 385 | 399 + | 0.000934 | AGGAACGTGCGGCGC  |
| AR | ENSG00000107771 | 166 | 180 + | 0.000939 | CGGGACTGCGCGTGC  |
| AR | ENSG00000201199 | 25  | 39 +  | 0.000939 | AGGAAGAACATGCAT  |
| AR | ENSG00000182177 | 134 | 148 + | 0.000943 | AGGGACTGTAAGAGG  |
| AR | ENSG00000117419 | 286 | 300 - | 0.000948 | AGGCAGAGGCAGGGC  |
| AR | ENSG00000122406 | 272 | 286 - | 0.000948 | CGGAACAGAGACCGG  |
| AR | ENSG00000226763 | 176 | 190 + | 0.000948 | AGGAAAACCTGAGGCC |
| AR | ENSG00000115419 | 376 | 390 - | 0.000948 | GGGAACGCGGTCTGT  |
| AR | ENSG00000134326 | 249 | 263 + | 0.000948 | AGGCAGAGGGTGCTA  |
| AR | ENSG00000114503 | 342 | 356 - | 0.000948 | CGGTACTGGCTCAGC  |
| AR | ENSG00000127423 | 1   | 15 -  | 0.000952 | GAGGAGTGCCTGTTT  |
| AR | ENSG00000162889 | 51  | 65 -  | 0.000952 | GAGGACGCGCGGTGC  |
| AR | ENSG00000184669 | 129 | 143 + | 0.000952 | GGGAACGGGGAGGGA  |
| AR | ENSG00000207185 | 214 | 228 + | 0.000952 | CAGCACAGGTACTAA  |
| AR | ENSG00000243420 | 267 | 281 - | 0.000952 | AAGAACTCCTGGACT  |
| AR | ENSG00000119711 | 9   | 23 -  | 0.000952 | GAGCACACGGGGAAG  |
| AR | ENSG00000179583 | 222 | 236 - | 0.000952 | AAGCACACAGCCTCA  |
| AR | ENSG00000131508 | 345 | 359 + | 0.000952 | AGGAACTGGCACTTG  |
| AR | ENSG00000256326 | 133 | 147 - | 0.000952 | AGGAAAACCTCTGCTA |
| AR | ENSG00000236842 | 147 | 161 - | 0.000957 | CGGAACTGTGCGCCC  |
| AR | ENSG00000254772 | 135 | 149 + | 0.000957 | CAGAACTTCCTGCAG  |
| AR | ENSG00000124302 | 232 | 246 - | 0.000957 | CAGCACTGCCGGATC  |
| AR | ENSG00000175110 | 27  | 41 -  | 0.000957 | AGGGCACTCTCCAG   |
| AR | ENSG00000147874 | 327 | 341 + | 0.000957 | AAGGACGCATTGCAT  |
| AR | ENSG00000242941 | 268 | 282 - | 0.000962 | GAGCAGATGTAGTAC  |
| AR | ENSG00000255730 | 202 | 216 + | 0.000962 | AAGGAAAGGCAGAGC  |
| AR | ENSG00000127399 | 124 | 138 - | 0.000962 | CGGAACTGAGGCTTC  |
| AR | ENSG00000168066 | 321 | 335 + | 0.000966 | AAGGACTGAGGCTCC  |
| AR | ENSG00000126803 | 211 | 225 - | 0.000966 | AGGCACATGGCGGCA  |

|    |                 |     |       |          |                 |
|----|-----------------|-----|-------|----------|-----------------|
| AR | ENSG00000087111 | 174 | 188 + | 0.000966 | AAGAACGGCCTCATT |
| AR | ENSG00000248394 | 358 | 372 + | 0.000966 | TGGTACAGCTTCATT |
| AR | ENSG00000159079 | 130 | 144 - | 0.000971 | CAGAAGTGTCTTG   |
| AR | ENSG00000224502 | 103 | 117 - | 0.000971 | AGGCACGTGTTGGGC |
| AR | ENSG00000120068 | 97  | 111 - | 0.000975 | CAGAACGCAGAGCGA |
| AR | ENSG00000141753 | 30  | 44 +  | 0.000975 | AAGGACTTTCAGATG |
| AR | ENSG00000188001 | 282 | 296 - | 0.000975 | GAGCACGTGGTGCCT |
| AR | ENSG00000119922 | 125 | 139 + | 0.00098  | GAGGAAAAAGAGTCC |
| AR | ENSG00000078487 | 219 | 233 - | 0.00098  | GGGAAGAGGAAGTTG |
| AR | ENSG00000143499 | 321 | 335 + | 0.000984 | GGGCACAGCCGGCGG |
| AR | ENSG00000196498 | 3   | 17 +  | 0.000984 | GGGGACGCGCAGGGC |
| AR | ENSG00000244684 | 150 | 164 - | 0.000984 | AAGAAAAAAGTGAGA |
| AR | ENSG00000212464 | 362 | 376 - | 0.000989 | AAGGACTTAACTTA  |
| AR | ENSG00000111752 | 37  | 51 -  | 0.000989 | TAGAACAATGGGGCT |
| AR | ENSG00000206567 | 321 | 335 + | 0.000989 | GGGCACTCTCTGCGG |
| AR | ENSG00000169239 | 342 | 356 + | 0.000989 | TGGAACCTATTGGAA |
| AR | ENSG00000252150 | 236 | 250 - | 0.000994 | AAGAAAATGGTGCAT |
| AR | ENSG00000072518 | 236 | 250 - | 0.000998 | GGGGACGCGCTCTCC |
| AR | ENSG00000150893 | 312 | 326 - | 0.000998 | AGGAACTCCGCGCGT |
| AR | ENSG00000164306 | 319 | 333 - | 0.000998 | AGGAAGACCTAGATT |
| AR | ENSG00000232940 | 257 | 271 - | 0.000998 | GAGCACACCCGCCGC |
