# Supplementary material for: Prosaposin activates the androgen receptor and potentiates resistance to endocrine treatment in breast cancer
Source: Springer Nature journal article supplement (doi:10.1186/s13058-015-0636-6), 2015-09-04
Supplement: MOESM6 [file 9781562]

| motif | gene            | start | stop | strand | p.value  | matched.sequence      |
|-------|-----------------|-------|------|--------|----------|-----------------------|
| ESR1  | ENSG00000227200 | 266   | 285  | -      | 1.51E-08 | CACCCAGGTCAACATGACCC  |
| ESR1  | ENSG00000105675 | 20    | 39   | -      | 1.30E-07 | CCCCCATGTCAACCTGCCCT  |
| ESR1  | ENSG00000253302 | 110   | 129  | +      | 1.47E-07 | CTCCAAGGGCACCCAGCCCT  |
| ESR1  | ENSG00000155636 | 115   | 134  | -      | 2.02E-07 | GACGCGGGGGACCCTGACCC  |
| ESR1  | ENSG00000050426 | 302   | 321  | -      | 2.38E-07 | CGCGGAGGGCACCCCTGTCT  |
| ESR1  | ENSG00000221585 | 104   | 123  | -      | 3.09E-07 | CTGCCGGGTGACCTTGCCCT  |
| ESR1  | ENSG00000141524 | 270   | 289  | -      | 3.53E-07 | GGCCCCGGCCTCCCTGACCC  |
| ESR1  | ENSG00000258388 | 69    | 88   | +      | 4.42E-07 | CCTCCAGGCCACCCTGCCAC  |
| ESR1  | ENSG00000165182 | 123   | 142  | +      | 6.34E-07 | CGGCAGGGTCACCCCGGCCCT |
| ESR1  | ENSG00000222019 | 314   | 333  | -      | 1.08E-06 | GGGGCCGGTCACCCCGCCCC  |
| ESR1  | ENSG00000167165 | 233   | 252  | -      | 1.12E-06 | AGGGAGGGTCACACTGGCCC  |
| ESR1  | ENSG00000167635 | 196   | 215  | +      | 1.19E-06 | CGCCAGGACTCCAGACCC    |
| ESR1  | ENSG00000255529 | 217   | 236  | +      | 1.30E-06 | GTCCACGGTCACCCTGCTCT  |
| ESR1  | ENSG00000202031 | 175   | 194  | +      | 1.79E-06 | TGGGGAGGGCAGCCTGACTC  |
| ESR1  | ENSG00000178550 | 196   | 215  | -      | 1.88E-06 | GAGCAGGGGCAGCATGGCCT  |
| ESR1  | ENSG00000250012 | 155   | 174  | +      | 2.02E-06 | AGGCCGGGCCTCCCTGGCCC  |
| ESR1  | ENSG00000196557 | 1     | 20   | +      | 2.27E-06 | CGCCCCGGCCACGCTGGCCC  |
| ESR1  | ENSG00000257108 | 358   | 377  | +      | 2.29E-06 | GTCAGAAGTCTCCCTGACCT  |
| ESR1  | ENSG00000100934 | 239   | 258  | +      | 2.52E-06 | GGCGCATGTCACCATGCCCG  |
| ESR1  | ENSG00000107331 | 102   | 121  | -      | 2.69E-06 | GACAGAGGACAGGCTGACCC  |
| ESR1  | ENSG00000204622 | 219   | 238  | -      | 2.74E-06 | GGTTCGGGGCGCCATGACCC  |
| ESR1  | ENSG00000132849 | 369   | 388  | +      | 2.75E-06 | TTCCCGGGCCTGCCTGCCCT  |
| ESR1  | ENSG00000117632 | 225   | 244  | -      | 3.03E-06 | CCTGCAGGGCCCCCTGCCCC  |
| ESR1  | ENSG00000203896 | 336   | 355  | +      | 3.06E-06 | ACCCAGGGTGGCCCTGCCCC  |
| ESR1  | ENSG00000127022 | 24    | 43   | +      | 3.19E-06 | CCCCGAGGCCACGCAGACCT  |
| ESR1  | ENSG00000139350 | 299   | 318  | -      | 3.46E-06 | GGGCGGGGGCCCGCTGACCT  |
| ESR1  | ENSG00000185278 | 6     | 25   | -      | 3.67E-06 | TGCTAAGGTCACCTGAATT   |
| ESR1  | ENSG00000126351 | 254   | 273  | +      | 3.83E-06 | AAGGGAGGGCAGCCTGCCAT  |
| ESR1  | ENSG00000189410 | 13    | 32   | -      | 3.85E-06 | GGAGCGGGGCACCCTGACAG  |
| ESR1  | ENSG00000100399 | 194   | 213  | +      | 3.89E-06 | AGGCGGGGACAGCCTGTCCC  |
| ESR1  | ENSG00000138442 | 256   | 275  | -      | 3.98E-06 | GCTTCAGGTACCCCGCCCA   |
| ESR1  | ENSG00000157734 | 119   | 138  | -      | 4.01E-06 | CCCCCAGGCGACCCCGCCCC  |
| ESR1  | ENSG00000132510 | 134   | 153  | -      | 4.08E-06 | TTTCCTGGGCTCCCTGCCCC  |
| ESR1  | ENSG00000186862 | 260   | 279  | -      | 4.10E-06 | GTGCCTGGTCGCCTCACCT   |
| ESR1  | ENSG00000247275 | 302   | 321  | -      | 4.76E-06 | GGGTTAGGTGAGCATGATCC  |
| ESR1  | ENSG00000116701 | 321   | 340  | +      | 4.93E-06 | TGCCAAGGTTACCCTGGCTC  |
| ESR1  | ENSG00000258136 | 127   | 146  | -      | 4.93E-06 | TGCTTTGGCCACTCTGACCC  |
| ESR1  | ENSG00000135709 | 332   | 351  | -      | 5.01E-06 | CTCCCGGGTCATCCTTCCCC  |
| ESR1  | ENSG00000117983 | 118   | 137  | -      | 5.07E-06 | CACGCAGGGCACCATGCTCT  |
| ESR1  | ENSG00000196372 | 153   | 172  | +      | 5.10E-06 | GGCCAGCGCAGACTGGCCC   |
| ESR1  | ENSG00000182934 | 90    | 109  | -      | 5.10E-06 | GGGCCGGGGCCTTTGACCC   |
| ESR1  | ENSG00000125954 | 30    | 49   | +      | 5.91E-06 | TGCCAAGGAGACTGTGCCCT  |
| ESR1  | ENSG00000004399 | 211   | 230  | -      | 6.04E-06 | GGCCCGGGTCAGCCTCGCCG  |
| ESR1  | ENSG00000202058 | 203   | 222  | -      | 6.25E-06 | CAGCCAGATCACCTCACAT   |
| ESR1  | ENSG00000200091 | 203   | 222  | -      | 6.25E-06 | CAGCCAGATCACCTCACAT   |
| ESR1  | ENSG00000167741 | 320   | 339  | -      | 6.50E-06 | GCTGCATGTGAGCCTGCCCC  |
| ESR1  | ENSG00000134255 | 338   | 357  | -      | 6.61E-06 | GGCTCAGCTCCCCGTGCCCT  |
| ESR1  | ENSG00000162746 | 267   | 286  | -      | 6.61E-06 | GAACCGGGGCACCTTGATCC  |
| ESR1  | ENSG00000237317 | 228   | 247  | -      | 6.68E-06 | TGACAAGGTCACTGTGGCTT  |

|      |                 |     |       |          |                       |
|------|-----------------|-----|-------|----------|-----------------------|
| ESR1 | ENSG00000143627 | 115 | 134 - | 6.80E-06 | CCAGTAGGCCACCCTGTCCC  |
| ESR1 | ENSG00000214597 | 190 | 209 + | 6.91E-06 | CTCCCTGGCCTCGCTGCCCT  |
| ESR1 | ENSG00000122778 | 303 | 322 + | 7.11E-06 | CGCCGGGGTCGCGCTGGCCC  |
| ESR1 | ENSG00000177731 | 113 | 132 + | 7.22E-06 | AGCGCAGGTGACGGTGCCTC  |
| ESR1 | ENSG00000111780 | 287 | 306 - | 7.47E-06 | GGCCAAGGTCACAGTCCCTC  |
| ESR1 | ENSG00000163812 | 4   | 23 -  | 7.47E-06 | CGCCGGGTTACAGCCTGGCCC |
| ESR1 | ENSG00000197102 | 188 | 207 - | 7.55E-06 | CTGCCAGGTGGCCCCGCCCC  |
| ESR1 | ENSG00000106069 | 320 | 339 - | 7.55E-06 | ATGTCTGATCACCTGGCCT   |
| ESR1 | ENSG00000148814 | 100 | 119 + | 7.72E-06 | GCGCAGGGGCACCCACACCC  |
| ESR1 | ENSG00000185728 | 243 | 262 - | 7.76E-06 | GCTCCGAGCCTCCCTGACCT  |
| ESR1 | ENSG00000132010 | 319 | 338 + | 7.94E-06 | GCCCCGGGTCCTCTGCCAC   |
| ESR1 | ENSG00000185507 | 336 | 355 + | 7.98E-06 | CCGTGGGGGCTCCGTGACCC  |
| ESR1 | ENSG00000169062 | 61  | 80 -  | 8.25E-06 | CCGCCGGGTCAGGCGGCCCC  |
| ESR1 | ENSG00000236472 | 375 | 394 - | 8.57E-06 | AACCTGGGGCCTCCTGACCT  |
| ESR1 | ENSG00000165238 | 188 | 207 - | 8.57E-06 | GGCCAAGGACACACAGGCC   |
| ESR1 | ENSG00000229732 | 345 | 364 - | 8.62E-06 | CTCTCAGGACCCCTGTCT    |
| ESR1 | ENSG00000130638 | 73  | 92 +  | 8.67E-06 | AACACAGGTCCCCCTCCCC   |
| ESR1 | ENSG00000187144 | 248 | 267 - | 9.00E-06 | GGCAAGGGGCTGTGTGACCT  |
| ESR1 | ENSG00000213145 | 43  | 62 -  | 9.00E-06 | AGCCAGGTCACTGTAGCC    |
| ESR1 | ENSG00000161800 | 273 | 292 + | 9.20E-06 | TAGCCAAGCCTCCCTGCCCC  |
| ESR1 | ENSG00000115504 | 320 | 339 + | 9.20E-06 | ACACAAGGTTAGCATGCCCC  |
| ESR1 | ENSG00000167972 | 37  | 56 -  | 9.46E-06 | GGCAGAGGGCGCTCTGACTT  |
| ESR1 | ENSG0000012963  | 97  | 116 - | 9.61E-06 | GCGCCGGGTGACGGCGACCC  |
| ESR1 | ENSG00000213689 | 37  | 56 -  | 9.72E-06 | CTTGGGGGTCCTCCCTGCCCT |
| ESR1 | ENSG00000104529 | 143 | 162 - | 9.72E-06 | GGCCCCAGCCAGTCTGCCCT  |
| ESR1 | ENSG00000129810 | 91  | 110 + | 9.82E-06 | CCGGCGGGTCGCCGAGACCC  |
| ESR1 | ENSG00000110619 | 64  | 83 +  | 9.88E-06 | TCGCCAGCACACCCTGTCCC  |
| ESR1 | ENSG00000178836 | 184 | 203 + | 9.88E-06 | GGCCAGGTGCGCAAGCCTC   |
| ESR1 | ENSG00000168575 | 363 | 382 + | 9.88E-06 | GGGCCGGGTGACGCGGCCCC  |
| ESR1 | ENSG00000256500 | 69  | 88 +  | 1.01E-05 | CGCCCGGGTCAGCCC GCGCC |
| ESR1 | ENSG00000186106 | 382 | 401 - | 1.01E-05 | AAGCCC GGGCACCTCGCCC  |
| ESR1 | ENSG00000248636 | 151 | 170 + | 1.02E-05 | GCACCAGGACACCACGCCCC  |
| ESR1 | ENSG00000126777 | 140 | 159 - | 1.04E-05 | AGGGCAAGTCACTTTGACAC  |
| ESR1 | ENSG00000254901 | 226 | 245 - | 1.04E-05 | CGCCAAGGTACGCTGCCCC   |
| ESR1 | ENSG00000164142 | 263 | 282 - | 1.04E-05 | GGCCAGGTCCTCCAGGCC    |
| ESR1 | ENSG00000258545 | 110 | 129 - | 1.05E-05 | GGCTGGGCCTGCCTGGCCT   |
| ESR1 | ENSG00000225187 | 379 | 398 + | 1.06E-05 | TGCAAGGCCAGCCTGACCT   |
| ESR1 | ENSG00000134490 | 324 | 343 + | 1.07E-05 | GTCTCTGGTCGGCCTCACCT  |
| ESR1 | ENSG00000246731 | 7   | 26 +  | 1.08E-05 | CGGCCGGGGCCCCGTGCCCC  |
| ESR1 | ENSG00000240801 | 32  | 51 -  | 1.09E-05 | GAAGGCGGCCACCCTGCCCC  |
| ESR1 | ENSG00000139116 | 273 | 292 + | 1.09E-05 | GGGGCAGGGCGCACTCACCC  |
| ESR1 | ENSG00000110011 | 173 | 192 - | 1.11E-05 | CGCCCCGGCCACCGTGTCTC  |
| ESR1 | ENSG00000187721 | 224 | 243 - | 1.13E-05 | GATGCAGGCCACTTTGGCCT  |
| ESR1 | ENSG00000171169 | 373 | 392 - | 1.14E-05 | GAGCCGGGTGACCCCCGCCA  |
| ESR1 | ENSG00000249293 | 355 | 374 - | 1.15E-05 | ACCTGAGGTGACACTGGCCC  |
| ESR1 | ENSG00000226232 | 341 | 360 - | 1.17E-05 | GCTCAAGGGCACCAAGCCCC  |
| ESR1 | ENSG00000248423 | 239 | 258 + | 1.17E-05 | ACCCCTGGGGATCCTGTCT   |
| ESR1 | ENSG00000196353 | 121 | 140 + | 1.19E-05 | TCCAAGACCACCCTGGCCC   |
| ESR1 | ENSG00000103023 | 254 | 273 + | 1.29E-05 | GTGTGAGGCCAGCCTGAGTT  |
| ESR1 | ENSG00000099337 | 64  | 83 -  | 1.30E-05 | AGCCAGTGCTCCAGACCC    |

|      |                 |     |       |          |                       |
|------|-----------------|-----|-------|----------|-----------------------|
| ESR1 | ENSG00000196923 | 18  | 37 +  | 1.31E-05 | GGCCCCGGGTCGGCGAGGCCT |
| ESR1 | ENSG00000114503 | 371 | 390 - | 1.33E-05 | CGGCCCGGCCTCCCTCACCC  |
| ESR1 | ENSG00000065518 | 38  | 57 -  | 1.34E-05 | CTCGCAGTGCGCCCTGCCCC  |
| ESR1 | ENSG00000176261 | 118 | 137 - | 1.35E-05 | CTCTCACGTGACCTGACCG   |
| ESR1 | ENSG00000159214 | 329 | 348 + | 1.38E-05 | CGCCGAGGTGAGTCTGAACT  |
| ESR1 | ENSG00000177192 | 83  | 102 - | 1.42E-05 | AGGGCGGGGCACCAGGCCCT  |
| ESR1 | ENSG00000165409 | 293 | 312 + | 1.44E-05 | TAGCCAGGGCTGCGTGCCCCG |
| ESR1 | ENSG00000169964 | 87  | 106 - | 1.45E-05 | GGGCCAGGTGGCAGAGACCC  |
| ESR1 | ENSG00000207783 | 68  | 87 -  | 1.45E-05 | GGGCCAGGTGGCAGAGACCC  |
| ESR1 | ENSG00000138434 | 326 | 345 + | 1.46E-05 | TCCCCGGGGCCCCCTGCCCCG |
| ESR1 | ENSG00000230165 | 175 | 194 + | 1.47E-05 | CACCCTGGACTACCTGCCCC  |
| ESR1 | ENSG00000145494 | 310 | 329 - | 1.47E-05 | CTCCCCGGTGGCGAGACCC   |
| ESR1 | ENSG00000109452 | 130 | 149 + | 1.51E-05 | GGCTCTGGGCACCTTTACCT  |
| ESR1 | ENSG00000243284 | 88  | 107 + | 1.54E-05 | CAGGTAGGCCACCCTGTACAC |
| ESR1 | ENSG00000169583 | 59  | 78 +  | 1.54E-05 | GGTGGAGGTGGTCCTGACCC  |
| ESR1 | ENSG00000172819 | 339 | 358 - | 1.55E-05 | AGGCCAGGGCTCACAGACAT  |
| ESR1 | ENSG00000245562 | 11  | 30 +  | 1.55E-05 | GGCACATGCCACCATGCCCA  |
| ESR1 | ENSG00000186815 | 240 | 259 - | 1.59E-05 | AAGAAAGGTCAGTCAGACAC  |
| ESR1 | ENSG00000108298 | 266 | 285 - | 1.60E-05 | AGACCAGCTCGCCCTCACCT  |
| ESR1 | ENSG00000256757 | 149 | 168 + | 1.62E-05 | CCTCAGGGCATTCTGTCCC   |
| ESR1 | ENSG00000070366 | 363 | 382 + | 1.64E-05 | GGGCCGGGCCTGCCCCCCCC  |
| ESR1 | ENSG00000074582 | 246 | 265 - | 1.66E-05 | CTCCTACCTCACCTGCCCT   |
| ESR1 | ENSG00000117419 | 184 | 203 - | 1.70E-05 | ACCTCCGCGCACTCTGACCC  |
| ESR1 | ENSG00000208038 | 354 | 373 + | 1.70E-05 | GGATGAGGTGACCCTGGCCA  |
| ESR1 | ENSG00000234751 | 307 | 326 + | 1.75E-05 | TCCACAGGGCTCCCCGCCCC  |
| ESR1 | ENSG00000134780 | 15  | 34 +  | 1.85E-05 | GACTCGGCTCTCCCTGGCCT  |
| ESR1 | ENSG00000149292 | 245 | 264 + | 1.85E-05 | CAGGCAGGTCACTGCGCCAT  |
| ESR1 | ENSG00000142156 | 262 | 281 + | 1.87E-05 | GCGGCGGCCCACTCTGCCCT  |
| ESR1 | ENSG00000252974 | 4   | 23 -  | 1.90E-05 | CGGCCGGGTGAGTGCGCCCT  |
| ESR1 | ENSG00000134333 | 107 | 126 + | 1.93E-05 | ACTGAAGGTCGTCCTGACTC  |
| ESR1 | ENSG00000236546 | 121 | 140 + | 1.94E-05 | AGGACTGGGCAGCCTCACTT  |
| ESR1 | ENSG00000215039 | 293 | 312 + | 1.94E-05 | CTGCCAGGTCTCACTCTCCC  |
| ESR1 | ENSG00000004766 | 196 | 215 - | 1.97E-05 | GACCCAGGGTATCCTGTCTT  |
| ESR1 | ENSG00000175892 | 41  | 60 -  | 2.00E-05 | AACCGAGGCCAGAGTGTCCC  |
| ESR1 | ENSG00000003989 | 64  | 83 -  | 2.01E-05 | GGCCCCGGCCGCGCTGACCA  |
| ESR1 | ENSG00000249199 | 271 | 290 + | 2.05E-05 | TAACAGGGACAGCCAGACCC  |
| ESR1 | ENSG00000088298 | 352 | 371 + | 2.07E-05 | TGTCCCGGCGACCCAGACCT  |
| ESR1 | ENSG00000138496 | 82  | 101 - | 2.07E-05 | GACCCAGTTCCAGCTGACCT  |
| ESR1 | ENSG00000155984 | 56  | 75 -  | 2.08E-05 | GACACCTGTACCTTGGCCC   |
| ESR1 | ENSG00000123104 | 43  | 62 +  | 2.10E-05 | CCCGAGGGTCGCCCCGCCCC  |
| ESR1 | ENSG00000110719 | 146 | 165 - | 2.12E-05 | GGCCAGGGACGCCCCGCCCC  |
| ESR1 | ENSG00000149532 | 339 | 358 - | 2.12E-05 | CTTCCGGCCCAACCTGCCCC  |
| ESR1 | ENSG00000206567 | 381 | 400 + | 2.13E-05 | GCCTCAGGTGAGGGTCACCC  |
| ESR1 | ENSG00000121236 | 151 | 170 + | 2.15E-05 | GGGGCTGGACAATTTGACCC  |
| ESR1 | ENSG00000151006 | 153 | 172 - | 2.15E-05 | GTGCGAGACCAGCCTGACCA  |
| ESR1 | ENSG00000241738 | 114 | 133 - | 2.15E-05 | GTGCGAGACCAGCCTGACCA  |
| ESR1 | ENSG00000248127 | 129 | 148 - | 2.15E-05 | AGGCCAGGCCAAGCAGACCC  |
| ESR1 | ENSG00000116171 | 112 | 131 - | 2.16E-05 | GGA CTGAGTCAACCTGTCCC |
| ESR1 | ENSG00000121310 | 254 | 273 + | 2.16E-05 | GGA CTGAGTCAACCTGTCCC |
| ESR1 | ENSG00000103056 | 300 | 319 - | 2.18E-05 | GCCAATGGTGACCCGGACCC  |

|      |                 |     |       |          |                       |
|------|-----------------|-----|-------|----------|-----------------------|
| ESR1 | ENSG00000115239 | 220 | 239 - | 2.18E-05 | CGCCGAGGGCACCGCCCCCT  |
| ESR1 | ENSG00000122085 | 367 | 386 + | 2.19E-05 | CGCCAGGTCTGGAGCCCT    |
| ESR1 | ENSG00000144802 | 10  | 29 +  | 2.21E-05 | AATCTAGGCTCGTGCCCC    |
| ESR1 | ENSG00000205089 | 380 | 399 + | 2.21E-05 | GGGGGAGGCCCTCTGCCCC   |
| ESR1 | ENSG00000204618 | 22  | 41 +  | 2.21E-05 | GAGCCTGGGCACCCGCCCCA  |
| ESR1 | ENSG00000226746 | 312 | 331 - | 2.24E-05 | AGGCCAGGACAGCGTGGGCC  |
| ESR1 | ENSG00000131435 | 83  | 102 - | 2.24E-05 | CCCCGCGGCCAGCCCCGACCC |
| ESR1 | ENSG00000223430 | 58  | 77 -  | 2.25E-05 | TTCTTGGGTGGGCTGACCT   |
| ESR1 | ENSG00000112365 | 299 | 318 - | 2.25E-05 | ACGCCGGGGCCCGCTGGCCC  |
| ESR1 | ENSG00000222482 | 97  | 116 - | 2.29E-05 | CTCCCTGGTGACTGTGAGCT  |
| ESR1 | ENSG00000133808 | 163 | 182 + | 2.32E-05 | GCGGAAGGGGACGCTGCCTC  |
| ESR1 | ENSG00000138111 | 2   | 21 +  | 2.35E-05 | GAATCCAGGCAACCTGACCC  |
| ESR1 | ENSG00000240224 | 67  | 86 +  | 2.35E-05 | GGAGGAGGGCACTCTGTCTT  |
| ESR1 | ENSG00000156508 | 56  | 75 +  | 2.35E-05 | AGGCCAGCTCACGGTGACAA  |
| ESR1 | ENSG00000229674 | 308 | 327 - | 2.36E-05 | GGTGCCGGGCATGCTGACTT  |
| ESR1 | ENSG00000173137 | 212 | 231 - | 2.38E-05 | CTCCTGAGTCAGCTTGGCCT  |
| ESR1 | ENSG00000255152 | 368 | 387 + | 2.40E-05 | CCCACAGGGCCCTCAGACCC  |
| ESR1 | ENSG00000006062 | 180 | 199 - | 2.42E-05 | GCCCGTGGTCGCCCGCCCC   |
| ESR1 | ENSG00000146376 | 126 | 145 - | 2.45E-05 | AGGGAAGGGCTTCTGCCTC   |
| ESR1 | ENSG00000228063 | 13  | 32 +  | 2.46E-05 | GGGGCAGGTGGCGCTGCCCCG |
| ESR1 | ENSG00000253528 | 100 | 119 - | 2.46E-05 | AACCCAGGGCCTTCTGGCCC  |
| ESR1 | ENSG00000250101 | 196 | 215 + | 2.47E-05 | CGCCACGTCGGCCTCACCC   |
| ESR1 | ENSG00000221817 | 92  | 111 + | 2.48E-05 | GCTGAAGGTCTCCGAGCCCC  |
| ESR1 | ENSG00000132330 | 180 | 199 + | 2.48E-05 | GACCCAGCGCAGCCTCGCCT  |
| ESR1 | ENSG00000234925 | 373 | 392 - | 2.57E-05 | GGCCTTGCCACGTTGGCCT   |
| ESR1 | ENSG00000227802 | 205 | 224 + | 2.57E-05 | GGCCAGGTCTCCGAGCACT   |
| ESR1 | ENSG00000214535 | 116 | 135 + | 2.57E-05 | GTACAAGACCAGCCTGACCA  |
| ESR1 | ENSG00000256566 | 206 | 225 + | 2.59E-05 | GATCCCGGGCACGCTGGCTC  |
| ESR1 | ENSG00000258966 | 158 | 177 - | 2.63E-05 | GCTGCAGGGCACCGGGGCCT  |
| ESR1 | ENSG00000078687 | 26  | 45 -  | 2.68E-05 | ACTGCAGGTTGCCCTGACTT  |
| ESR1 | ENSG00000125733 | 51  | 70 +  | 2.68E-05 | CCCCCAGCTCACTCTACCA   |
| ESR1 | ENSG00000256278 | 133 | 152 - | 2.69E-05 | ATCTCAGCTCACTGTAACCT  |
| ESR1 | ENSG00000231942 | 122 | 141 + | 2.71E-05 | ATCTGAGGTCAGCTTGCTCC  |
| ESR1 | ENSG00000240848 | 218 | 237 - | 2.73E-05 | GGCTCAGGTGATCCTCCAC   |
| ESR1 | ENSG00000240776 | 256 | 275 - | 2.75E-05 | CTTCTTGCCACCATGACTC   |
| ESR1 | ENSG00000214593 | 241 | 260 - | 2.75E-05 | CTTCTTGCCACCATGACTC   |
| ESR1 | ENSG00000137817 | 52  | 71 -  | 2.76E-05 | GATGGAGAGCACCTGGCCT   |
| ESR1 | ENSG00000198417 | 339 | 358 + | 2.77E-05 | CGCTCAGGGGACCTTGCGCC  |
| ESR1 | ENSG00000134571 | 47  | 66 +  | 2.83E-05 | AGCCAGGGACAATGTGGCCC  |
| ESR1 | ENSG00000181826 | 248 | 267 - | 2.83E-05 | CCCCCAGGGCGCCGCTCCC   |
| ESR1 | ENSG00000187796 | 40  | 59 +  | 2.83E-05 | TCCCCAGGACCCCCAGCCCC  |
| ESR1 | ENSG00000185885 | 49  | 68 +  | 2.87E-05 | CGCCTAGGTCATCCAGCACT  |
| ESR1 | ENSG00000147684 | 77  | 96 +  | 2.87E-05 | GGGACAAGTCAGAAAGACCC  |
| ESR1 | ENSG00000222489 | 70  | 89 +  | 2.89E-05 | ACCACAGGCCACCATGCCTG  |
| ESR1 | ENSG00000130997 | 29  | 48 -  | 2.90E-05 | CGCTGCGGGCATCCTGCCTC  |
| ESR1 | ENSG00000232748 | 268 | 287 + | 2.93E-05 | CTGGAGGGTCCCCCAGCCCC  |
| ESR1 | ENSG00000109625 | 134 | 153 + | 2.95E-05 | GGGGCGGGGCACTCCGCCCCG |
| ESR1 | ENSG00000157077 | 311 | 330 + | 2.99E-05 | CGGACGGGGCGTCTGCCAC   |
| ESR1 | ENSG00000219665 | 146 | 165 - | 3.01E-05 | TGGATAGGGCATCCTACCCC  |
| ESR1 | ENSG00000205231 | 111 | 130 - | 3.04E-05 | CATCATGGACATTGTGACCC  |

|      |                 |     |       |          |                       |
|------|-----------------|-----|-------|----------|-----------------------|
| ESR1 | ENSG00000223878 | 159 | 178 - | 3.04E-05 | GTTCTTGGTCTCACTGACTT  |
| ESR1 | ENSG00000171056 | 83  | 102 + | 3.04E-05 | TCCCCAGGTTGCCCCGCCCT  |
| ESR1 | ENSG00000254093 | 120 | 139 + | 3.04E-05 | TCCCCAGGTTGCCCCGCCCT  |
| ESR1 | ENSG00000159337 | 50  | 69 -  | 3.05E-05 | CTGGCAGGGCTCCAGGACCT  |
| ESR1 | ENSG00000121152 | 331 | 350 - | 3.07E-05 | CGCCCAGGCCAGCCCCGCCAG |
| ESR1 | ENSG00000174564 | 178 | 197 - | 3.07E-05 | ATGCCTGGTGACTTTGCCAT  |
| ESR1 | ENSG00000076554 | 247 | 266 + | 3.07E-05 | GATCCTGGTCAGCTTCACAT  |
| ESR1 | ENSG00000156150 | 266 | 285 - | 3.08E-05 | GGCTCAGGGCGCACAGGCCT  |
| ESR1 | ENSG00000108010 | 42  | 61 -  | 3.10E-05 | CCGCTGGGGGGCTCTGACCC  |
| ESR1 | ENSG00000163738 | 126 | 145 + | 3.11E-05 | GGCCAGATCACCGTTGCCT   |
| ESR1 | ENSG00000258959 | 17  | 36 +  | 3.13E-05 | TGGCCGGGGCAGCGTGGGCC  |
| ESR1 | ENSG00000101082 | 269 | 288 - | 3.13E-05 | GGCCAGGGCCCTTTGAGCT   |
| ESR1 | ENSG00000102312 | 265 | 284 - | 3.13E-05 | TCCTCCGGGCAGCCTCCCC   |
| ESR1 | ENSG00000138495 | 345 | 364 + | 3.14E-05 | ATGCCGGGTCTGGTTGACTC  |
| ESR1 | ENSG00000167548 | 202 | 221 - | 3.18E-05 | CGGAGTGGCCACCCTCCCC   |
| ESR1 | ENSG00000226055 | 325 | 344 - | 3.21E-05 | CTCCAGGTGATTCTGACTG   |
| ESR1 | ENSG00000060656 | 279 | 298 - | 3.22E-05 | GGCGCGGGGGACGCCGCCCC  |
| ESR1 | ENSG00000232912 | 204 | 223 + | 3.24E-05 | CGAAAAGATGGCCTGCCT    |
| ESR1 | ENSG00000184381 | 69  | 88 -  | 3.25E-05 | GCCCAGGGTCAGCCAGCCTG  |
| ESR1 | ENSG00000137965 | 366 | 385 + | 3.30E-05 | CTCTCAGGTGACAGTGTAC   |
| ESR1 | ENSG00000114786 | 126 | 145 - | 3.32E-05 | GCCCCAGCGTCTCTGGCCC   |
| ESR1 | ENSG00000248930 | 43  | 62 -  | 3.32E-05 | CACTGAGGCCAACCTGA     |
| ESR1 | ENSG00000124693 | 326 | 345 + | 3.32E-05 | CCGCCCCGGGCACTGTGGCTC |
| ESR1 | ENSG00000150893 | 379 | 398 - | 3.34E-05 | TGACAGGTCAGCCTGAGAG   |
| ESR1 | ENSG00000161179 | 238 | 257 + | 3.34E-05 | GACCCAGGCGGCCATGTCCC  |
| ESR1 | ENSG00000231980 | 15  | 34 +  | 3.39E-05 | GGCCTGGTCATCCTTCCAC   |
| ESR1 | ENSG00000140943 | 241 | 260 - | 3.40E-05 | CGACCGGGCCAGCGAGGCC   |
| ESR1 | ENSG00000106608 | 264 | 283 + | 3.40E-05 | TGCCCGGGTTACGCTGGCCA  |
| ESR1 | ENSG00000252304 | 87  | 106 + | 3.40E-05 | AGCGGAAGTCACTATGACTC  |
| ESR1 | ENSG00000233246 | 323 | 342 + | 3.44E-05 | GCACCGGGTGAACCTGCGCT  |
| ESR1 | ENSG00000243135 | 85  | 104 + | 3.45E-05 | AGAGGAGGGCACTCTGTCTT  |
| ESR1 | ENSG00000236842 | 315 | 334 + | 3.47E-05 | CCCCGACGGCGGCCTGACCC  |
| ESR1 | ENSG00000114126 | 322 | 341 + | 3.47E-05 | CGCGGGGCGCGCCTGACCC   |
| ESR1 | ENSG00000154309 | 5   | 24 +  | 3.49E-05 | AAGCCAAGCCCCTCTGCCCT  |
| ESR1 | ENSG00000172345 | 91  | 110 + | 3.49E-05 | CCCCGCGTCTCCTTGTCT    |
| ESR1 | ENSG00000135476 | 47  | 66 +  | 3.51E-05 | CGCGCAGAGCAGCAAGACCC  |
| ESR1 | ENSG00000240053 | 173 | 192 + | 3.56E-05 | GGCCAGCCCACCCTCCCCA   |
| ESR1 | ENSG00000170421 | 140 | 159 + | 3.58E-05 | GCACCTGGTCACTCTGGGCC  |
| ESR1 | ENSG00000222020 | 55  | 74 -  | 3.65E-05 | CTCATAGGGCATCCGGCCCC  |
| ESR1 | ENSG00000147642 | 345 | 364 + | 3.68E-05 | CACCCAGCGGTGCCTGCCCT  |
| ESR1 | ENSG00000007202 | 253 | 272 + | 3.74E-05 | CCCGCGGGTCCCCGAGCCCC  |
| ESR1 | ENSG00000145819 | 131 | 150 - | 3.76E-05 | CAATCAGCGCACCTCCCCT   |
| ESR1 | ENSG00000198742 | 80  | 99 +  | 3.77E-05 | GTAGCAGCGCACCCCCCCCC  |
| ESR1 | ENSG00000230798 | 41  | 60 -  | 3.79E-05 | GGTCCCGGTCCCGCTGCCCA  |
| ESR1 | ENSG00000232536 | 316 | 335 + | 3.79E-05 | GTTCGGGGCGTCCCTGCCCT  |
| ESR1 | ENSG00000177868 | 184 | 203 - | 3.85E-05 | GACCCAGCGTGCCTGCCCA   |
| ESR1 | ENSG00000154134 | 346 | 365 + | 3.87E-05 | GGGGCTGGGCCCCCAGCCCC  |
| ESR1 | ENSG00000226054 | 46  | 65 -  | 3.89E-05 | GGCCACGGCGGCCTCACCT   |
| ESR1 | ENSG00000255282 | 13  | 32 -  | 3.91E-05 | GAGAATGGGCAGACTGCCTC  |
| ESR1 | ENSG00000006740 | 7   | 26 +  | 4.00E-05 | GCTGCTGGTGACGCTGCCTT  |

|      |                 |     |       |          |                       |
|------|-----------------|-----|-------|----------|-----------------------|
| ESR1 | ENSG00000214300 | 139 | 158 + | 4.04E-05 | TTGCCAGGTTGGAATGACCT  |
| ESR1 | ENSG00000215450 | 203 | 222 - | 4.08E-05 | TCCCCAGGGCCTCCAGCCCC  |
| ESR1 | ENSG00000227848 | 341 | 360 - | 4.12E-05 | GGCGCTGGTCACCTTTACAT  |
| ESR1 | ENSG00000141380 | 77  | 96 -  | 4.12E-05 | TTGGAAAGTAACCCTGACCC  |
| ESR1 | ENSG00000183773 | 310 | 329 + | 4.14E-05 | CGCCCCGGGGACCCTGGTCC  |
| ESR1 | ENSG00000226312 | 273 | 292 - | 4.16E-05 | ACTCAAAGTCACACTGTTCAT |
| ESR1 | ENSG00000104976 | 166 | 185 + | 4.18E-05 | CGCGCGGTTCTTTCTGACCT  |
| ESR1 | ENSG00000205424 | 188 | 207 - | 4.22E-05 | TGGTCATGCCTTCCTGCCT   |
| ESR1 | ENSG00000100605 | 256 | 275 - | 4.26E-05 | GAGGAAGCGGACCCTGGCCCC |
| ESR1 | ENSG00000216642 | 230 | 249 + | 4.26E-05 | AAAAAGGGCCACTCTGCCAT  |
| ESR1 | ENSG00000219481 | 148 | 167 + | 4.35E-05 | GCCTTGGGTTATCCTGACAC  |
| ESR1 | ENSG00000236132 | 359 | 378 + | 4.37E-05 | GTTTCGAGACCAGCCTGACCA |
| ESR1 | ENSG00000251314 | 319 | 338 - | 4.37E-05 | TCCCCAAGCCAGCCTGGCCA  |
| ESR1 | ENSG00000258802 | 217 | 236 + | 4.45E-05 | TTCCAAGGGCGCCGGGCCCT  |
| ESR1 | ENSG00000214184 | 326 | 345 + | 4.45E-05 | GGCCCGGCTCTCCTTGCCTC  |
| ESR1 | ENSG00000232830 | 306 | 325 + | 4.48E-05 | CTGTGAGGACAGCCAGGCCT  |
| ESR1 | ENSG00000251705 | 176 | 195 + | 4.52E-05 | CGCCCTTGCCAAATTGACCT  |
| ESR1 | ENSG00000223501 | 253 | 272 - | 4.54E-05 | CAGCCAGGTCGCGCTGAAAC  |
| ESR1 | ENSG00000231500 | 167 | 186 + | 4.54E-05 | CAGCCAGGTCGCGCTGAAAC  |
| ESR1 | ENSG00000099901 | 4   | 23 +  | 4.56E-05 | CAGCCAGGGCAGCAAGGCAC  |
| ESR1 | ENSG00000072274 | 53  | 72 -  | 4.56E-05 | CGCGATGGGCGCACTGGCCT  |
| ESR1 | ENSG00000170873 | 25  | 44 +  | 4.56E-05 | GGCCAGCGCCGCCTGCCCCG  |
| ESR1 | ENSG00000253773 | 63  | 82 +  | 4.58E-05 | TATCCAGGCCTGCATGACTC  |
| ESR1 | ENSG00000215127 | 38  | 57 -  | 4.61E-05 | GTCTCGGCTCACTGTAACT   |
| ESR1 | ENSG00000152942 | 307 | 326 + | 4.61E-05 | TGCCCAGAGCACTCTGCGCC  |
| ESR1 | ENSG00000184508 | 106 | 125 - | 4.65E-05 | GGCCGAGTTGGGCCTGCCCC  |
| ESR1 | ENSG00000228703 | 132 | 151 - | 4.67E-05 | CCTCATGGTCTCCCTGTCCA  |
| ESR1 | ENSG00000250644 | 366 | 385 - | 4.67E-05 | GGCTGGGATCACCGAGCCCT  |
| ESR1 | ENSG00000249249 | 61  | 80 +  | 4.67E-05 | CGGAAAGGCCTGCCCGCCCC  |
| ESR1 | ENSG00000129472 | 265 | 284 - | 4.70E-05 | GTTCCGGGTCCGCCCGACTT  |
| ESR1 | ENSG00000224078 | 18  | 37 +  | 4.70E-05 | TTTCCAGGTCCACCTCCCCC  |
| ESR1 | ENSG00000135926 | 229 | 248 - | 4.72E-05 | CGGCTGGGGCTCCGCGCCCC  |
| ESR1 | ENSG00000173210 | 336 | 355 - | 4.79E-05 | GAGCCAGAGGCCCTGCCCC   |
| ESR1 | ENSG00000075415 | 349 | 368 - | 4.81E-05 | AGGCCCGGCCACACTCACTC  |
| ESR1 | ENSG00000202415 | 203 | 222 - | 4.83E-05 | CAGCCAGGTTGCCCTCACAT  |
| ESR1 | ENSG00000256390 | 6   | 25 -  | 4.86E-05 | TGTCCTGGTCACCAGGGCCC  |
| ESR1 | ENSG00000151465 | 193 | 212 - | 4.93E-05 | CCCTAAACGCACGCTGACCC  |
| ESR1 | ENSG00000157985 | 352 | 371 + | 4.93E-05 | CAGCGCGGCCACACTGCCCA  |
| ESR1 | ENSG00000235374 | 82  | 101 + | 4.93E-05 | GGCTGAGGAGACTCTGCCCC  |
| ESR1 | ENSG00000251186 | 225 | 244 + | 4.93E-05 | TCAGCATGTCTGCTTGACCT  |
| ESR1 | ENSG00000196712 | 343 | 362 + | 5.02E-05 | TCCCCGGGTCCCCTTCCCCT  |
| ESR1 | ENSG00000067182 | 107 | 126 - | 5.05E-05 | GTCCAGATCTGGCTGCCTT   |
| ESR1 | ENSG00000197647 | 323 | 342 + | 5.07E-05 | GGTTCAGGTGCCTCTGCCAT  |
| ESR1 | ENSG00000143878 | 44  | 63 +  | 5.07E-05 | AATCAAGCTGGCCCTGCCCC  |
| ESR1 | ENSG00000244926 | 106 | 125 - | 5.10E-05 | ACCACGTGTCTTCTTGACCT  |
| ESR1 | ENSG00000213204 | 291 | 310 - | 5.10E-05 | GGTCAAGGGCGCGGAGCCCC  |
| ESR1 | ENSG00000160957 | 127 | 146 - | 5.10E-05 | GCCCCTGGGCAGCCAGTCCG  |
| ESR1 | ENSG00000164051 | 268 | 287 + | 5.12E-05 | GAGCACGTTCGGCCTGCCCC  |
| ESR1 | ENSG00000129158 | 113 | 132 - | 5.20E-05 | CCTCCCAGTCAGCCCGCCCC  |
| ESR1 | ENSG00000258509 | 329 | 348 + | 5.22E-05 | TGAACAGATCATCGTGACCG  |

|      |                 |     |       |          |                      |
|------|-----------------|-----|-------|----------|----------------------|
| ESR1 | ENSG00000154274 | 247 | 266 + | 5.22E-05 | AGCCATGGGCGCCGGGACCC |
| ESR1 | ENSG00000163870 | 294 | 313 - | 5.25E-05 | GACCGAGGTCACGCAGCCAG |
| ESR1 | ENSG00000168505 | 103 | 122 + | 5.30E-05 | GGCCAGAGGCGCCAGCCCC  |
| ESR1 | ENSG00000249967 | 55  | 74 +  | 5.32E-05 | GGGGATGGACAGCCTGTAC  |
| ESR1 | ENSG00000102024 | 174 | 193 - | 5.35E-05 | AAGCCAGCGCTCCCTCCCCT |
| ESR1 | ENSG00000110092 | 380 | 399 + | 5.37E-05 | CAGCCAGGACCCACAGCCCT |
| ESR1 | ENSG00000243725 | 175 | 194 - | 5.40E-05 | AGCGCAGGTCCCCGCGCCTT |
| ESR1 | ENSG00000235546 | 287 | 306 - | 5.40E-05 | GCCCCAGCTCATGCTGTCTC |
| ESR1 | ENSG00000234062 | 189 | 208 + | 5.48E-05 | GCGACAGCTCACGATGCCCC |
| ESR1 | ENSG00000137101 | 272 | 291 - | 5.50E-05 | CAGTCATGTACCCAGTCCA  |
| ESR1 | ENSG0000023171  | 273 | 292 + | 5.53E-05 | TCCCAGGGTCTCCTTGCTT  |
| ESR1 | ENSG00000103832 | 375 | 394 - | 5.55E-05 | GGGGCAGGGCTGACTGACAA |
| ESR1 | ENSG00000232485 | 81  | 100 + | 5.61E-05 | TCACCATGTCGCCGCGACCT |
| ESR1 | ENSG00000230753 | 25  | 44 +  | 5.61E-05 | GCGTCAGGGCAACGCGCCAC |
| ESR1 | ENSG00000228172 | 211 | 230 - | 5.66E-05 | CCTCCCGGGGACACAGACCC |
| ESR1 | ENSG00000135916 | 181 | 200 - | 5.69E-05 | GTCCAAGGCCAGCATCCCCG |
| ESR1 | ENSG00000203301 | 294 | 313 + | 5.71E-05 | CCCCGTGCTCCCCCTGCCCT |
| ESR1 | ENSG00000246889 | 84  | 103 - | 5.74E-05 | GACCCGGGCCGACCGACCC  |
| ESR1 | ENSG00000065361 | 338 | 357 - | 5.80E-05 | AGCCTCGGACCGCCTGCCCC |
| ESR1 | ENSG00000213641 | 379 | 398 - | 5.82E-05 | AGAGAATGGCTCTCTGCCCT |
| ESR1 | ENSG00000129194 | 262 | 281 - | 5.82E-05 | GTGGCAGGCGGGCCAGACCT |
| ESR1 | ENSG00000168887 | 151 | 170 + | 5.82E-05 | GGCCGGGGCCTCCCAGACCG |
| ESR1 | ENSG00000254827 | 114 | 133 - | 5.85E-05 | CCCTCTGGAGTCCCTGCCCC |
| ESR1 | ENSG00000184669 | 112 | 131 - | 5.91E-05 | CCCGCCGGGCGCCCCGCCCT |
| ESR1 | ENSG00000168291 | 69  | 88 -  | 5.91E-05 | CGTGTGGGTGGCCGTGCCCC |
| ESR1 | ENSG00000147687 | 181 | 200 + | 5.91E-05 | CTACAAGGTCTCCCGGCCAT |
| ESR1 | ENSG00000147874 | 68  | 87 -  | 5.91E-05 | CGCTATGCTCACTGTGACTC |
| ESR1 | ENSG00000218739 | 351 | 370 + | 5.99E-05 | TAGTCAGGTGTCACTGCCTT |
| ESR1 | ENSG00000136143 | 375 | 394 + | 6.02E-05 | GCAGCTGGTCACCACGACTC |
| ESR1 | ENSG00000228501 | 304 | 323 + | 6.05E-05 | TCCACAGGGCTCTCCGCCCC |
| ESR1 | ENSG00000157851 | 112 | 131 - | 6.05E-05 | GGCTGCGGCCGCGCTGCCCT |
| ESR1 | ENSG00000145907 | 174 | 193 + | 6.05E-05 | CGCGCGGACCACCGTGCCTC |
| ESR1 | ENSG00000176029 | 121 | 140 + | 6.11E-05 | CTCCAAGGCCTCCTGTCCC  |
| ESR1 | ENSG00000083845 | 332 | 351 + | 6.11E-05 | GAGACGGGTCGCGCTGCTCC |
| ESR1 | ENSG00000225611 | 164 | 183 - | 6.14E-05 | TGCCTGGGGCAGCCTGCTTT |
| ESR1 | ENSG00000241550 | 134 | 153 - | 6.16E-05 | CGCCCAGGTCATCTTGATT  |
| ESR1 | ENSG00000157106 | 86  | 105 - | 6.19E-05 | ATAGCAGGCCGCCCCGCCCC |
| ESR1 | ENSG00000139154 | 202 | 221 + | 6.25E-05 | AAGCAAGGGCAACCAGCTCC |
| ESR1 | ENSG00000126226 | 181 | 200 + | 6.25E-05 | GGCCGGGGGCGCCAGGACCC |
| ESR1 | ENSG00000168883 | 318 | 337 + | 6.28E-05 | ATCTCGGGGCAGCCTGCATT |
| ESR1 | ENSG00000169184 | 238 | 257 + | 6.28E-05 | ACCCCTCGTCTCGCTGCCCT |
| ESR1 | ENSG00000250251 | 177 | 196 + | 6.34E-05 | GGCCATGCGCGCGCTGCCCT |
| ESR1 | ENSG00000125966 | 250 | 269 - | 6.34E-05 | GCGCCCGGCCGCGCTGCCTT |
| ESR1 | ENSG00000113231 | 266 | 285 + | 6.43E-05 | GCGGGCGGGCGCCCTGGCCC |
| ESR1 | ENSG00000118849 | 222 | 241 - | 6.46E-05 | GGGCCGGGTGCTTCTGGCCC |
| ESR1 | ENSG00000113282 | 304 | 323 - | 6.55E-05 | GGCCGGGGTCACCGCCGCCC |
| ESR1 | ENSG00000130589 | 236 | 255 - | 6.62E-05 | CTCCTGGAGCTGCCTGCCCT |
| ESR1 | ENSG00000008710 | 236 | 255 + | 6.71E-05 | CTCCCGGAGCGGCCTGGCCC |
| ESR1 | ENSG00000176715 | 57  | 76 +  | 6.71E-05 | CTCCCCGGTCAGCTTGCCGC |
| ESR1 | ENSG00000255185 | 75  | 94 +  | 6.74E-05 | TCCACCGGGCATCCTCCCC  |

|      |                 |     |       |          |                       |
|------|-----------------|-----|-------|----------|-----------------------|
| ESR1 | ENSG00000071794 | 327 | 346 - | 6.74E-05 | CTTCCAGGCCCCGCAGCCCT  |
| ESR1 | ENSG00000113716 | 378 | 397 - | 6.77E-05 | CGCCCCGCGCCGCTCAGCCCC |
| ESR1 | ENSG00000255158 | 115 | 134 + | 6.80E-05 | GGCTGCAGTCACCCTGGCCA  |
| ESR1 | ENSG00000173281 | 211 | 230 - | 6.80E-05 | CCCCGCGCCGCGCTGCCCC   |
| ESR1 | ENSG00000143499 | 365 | 384 - | 6.90E-05 | GCTCCAGGCCGCCGAGGCCC  |
| ESR1 | ENSG00000131773 | 195 | 214 - | 6.90E-05 | CGCCCCGCGCACTCTGAGCC  |
| ESR1 | ENSG00000236658 | 1   | 20 -  | 6.90E-05 | GACAGAGGTCACCCTGTAAC  |
| ESR1 | ENSG00000183020 | 220 | 239 + | 6.93E-05 | GGAGCTGTGCAGCCTGGCCC  |
| ESR1 | ENSG00000138100 | 102 | 121 - | 6.93E-05 | GGAGTGAGTGACCCTGACTC  |
| ESR1 | ENSG00000163083 | 269 | 288 + | 7.03E-05 | CGCTGGGGGCCGCTGCCTT   |
| ESR1 | ENSG00000127928 | 114 | 133 - | 7.03E-05 | AAATCGGGTCACTCCCACCC  |
| ESR1 | ENSG00000139637 | 88  | 107 + | 7.06E-05 | ATCGCAGGGCCCTTTGACCA  |
| ESR1 | ENSG00000100320 | 137 | 156 + | 7.06E-05 | GGCCAGGGGGAGGTGGCCT   |
| ESR1 | ENSG00000100234 | 148 | 167 - | 7.13E-05 | GCCCCCGGGGACCCCGCCTC  |
| ESR1 | ENSG00000130560 | 266 | 285 - | 7.13E-05 | CGGCCGGGCCGCCGTCCTC   |
| ESR1 | ENSG00000006607 | 207 | 226 - | 7.16E-05 | CGCGCAGCGCGCCCCGCCTT  |
| ESR1 | ENSG00000255432 | 224 | 243 + | 7.20E-05 | GGGAAAGATCAACCGGCCCC  |
| ESR1 | ENSG00000189343 | 241 | 260 + | 7.20E-05 | GGCCTGGTGGCCTGAGAT    |
| ESR1 | ENSG00000176148 | 164 | 183 + | 7.23E-05 | GCCACTGGCCACGGAGCCCC  |
| ESR1 | ENSG00000148296 | 209 | 228 - | 7.23E-05 | GGCCTGGCCTCAGTGCCTC   |
| ESR1 | ENSG00000233202 | 231 | 250 - | 7.23E-05 | CCTCGAGGGCAGCCTCAGCT  |
| ESR1 | ENSG00000089101 | 320 | 339 - | 7.26E-05 | CGCCTGGACGCCCTGCACC   |
| ESR1 | ENSG00000233603 | 86  | 105 + | 7.26E-05 | TGGCTTTCCACCTGACCT    |
| ESR1 | ENSG00000227589 | 241 | 260 + | 7.30E-05 | AGCTCTCATCACTCTGACCT  |
| ESR1 | ENSG00000258930 | 368 | 387 + | 7.30E-05 | ATGCATGGGCTCCCTGCACT  |
| ESR1 | ENSG00000109854 | 156 | 175 - | 7.37E-05 | AGGCGCGGGGAAGGTGACCC  |
| ESR1 | ENSG00000124201 | 175 | 194 + | 7.37E-05 | ACGCCGGGCCACCCGGGCTT  |
| ESR1 | ENSG00000008988 | 301 | 320 - | 7.43E-05 | GCGCGCGGGCTTCTGACCG   |
| ESR1 | ENSG00000176386 | 177 | 196 - | 7.47E-05 | CGCTCCGGGGGCGGTGACCC  |
| ESR1 | ENSG00000224386 | 201 | 220 + | 7.54E-05 | GCCTGGGGCCGGCCTGGCCC  |
| ESR1 | ENSG00000164048 | 56  | 75 -  | 7.61E-05 | GCTGAGGCGCACTTTGACCT  |
| ESR1 | ENSG00000227328 | 173 | 192 + | 7.61E-05 | GGCCAAGGGGCACTGTCTT   |
| ESR1 | ENSG00000163126 | 246 | 265 - | 7.65E-05 | GCCGCGGGCAGCCTCACCC   |
| ESR1 | ENSG00000237669 | 20  | 39 +  | 7.65E-05 | AGCCCCGCCACCGAGCCCT   |
| ESR1 | ENSG00000258660 | 382 | 401 + | 7.68E-05 | CACGTTGGCCAGGCTGGCCT  |
| ESR1 | ENSG00000189269 | 180 | 199 + | 7.68E-05 | CAGCCAGGGCCAGCAGCCCT  |
| ESR1 | ENSG00000093167 | 86  | 105 + | 7.72E-05 | GTTATCAGCCACCCTGCCCC  |
| ESR1 | ENSG00000243444 | 326 | 345 - | 7.72E-05 | CGCCGCGGTCACCATGGCAA  |
| ESR1 | ENSG00000147036 | 16  | 35 +  | 7.72E-05 | GGGACTGGAGACCATCACCT  |
| ESR1 | ENSG00000134824 | 19  | 38 -  | 7.79E-05 | CTCTCATGGCAACCAGTCCC  |
| ESR1 | ENSG00000134825 | 186 | 205 + | 7.79E-05 | CTCTCATGGCAACCAGTCCC  |
| ESR1 | ENSG00000168496 | 362 | 381 - | 7.79E-05 | CTCTCATGGCAACCAGTCCC  |
| ESR1 | ENSG00000215208 | 337 | 356 + | 7.79E-05 | TCCCCGATCTCCATGTCTT   |
| ESR1 | ENSG00000182909 | 90  | 109 - | 7.79E-05 | AGCTCTGGGAGCCTGGCCC   |
| ESR1 | ENSG00000249915 | 142 | 161 + | 7.79E-05 | TGCGCGGGACCCCGTGACCA  |
| ESR1 | ENSG00000151117 | 174 | 193 + | 7.82E-05 | AACCCATGTTTGCTGGCCC   |
| ESR1 | ENSG00000111252 | 92  | 111 + | 7.82E-05 | GCTCCTGGTGGCCCCGCCCC  |
| ESR1 | ENSG00000171345 | 24  | 43 -  | 7.82E-05 | AGACCAGAGGCCCTGCCTT   |
| ESR1 | ENSG00000257298 | 308 | 327 - | 7.86E-05 | CTGGCTGGGCACAGTGGCTC  |
| ESR1 | ENSG00000144504 | 87  | 106 - | 7.86E-05 | GACACGGGACAGCATGTAC   |



|      |                 |     |       |          |                       |
|------|-----------------|-----|-------|----------|-----------------------|
| ESR1 | ENSG00000165819 | 336 | 355 - | 7.90E-05 | CATCCTAGTCTCCCAGCCCT  |
| ESR1 | ENSG00000231357 | 159 | 178 - | 7.90E-05 | AGACAATGGGACTTTGCCCC  |
| ESR1 | ENSG00000257069 | 304 | 323 - | 7.93E-05 | CCCTGGGGCGTCCCTGCCCC  |
| ESR1 | ENSG00000185666 | 375 | 394 - | 7.93E-05 | GCTCCAGGGGACGCAGCCCC  |
| ESR1 | ENSG00000152348 | 293 | 312 - | 7.97E-05 | GAGCCGAGCCAGCGCGCCCC  |
| ESR1 | ENSG00000111907 | 336 | 355 + | 7.97E-05 | TGATCAGCCCACCTTGGCCT  |
| ESR1 | ENSG00000232479 | 205 | 224 - | 8.08E-05 | CTTCTGGGTACCCCTGATAG  |
| ESR1 | ENSG00000170027 | 63  | 82 -  | 8.08E-05 | TCTTCCGGGCACCCCGTCT   |
| ESR1 | ENSG00000110171 | 345 | 364 - | 8.12E-05 | CTGTCTGGGCCGCCTGCCTC  |
| ESR1 | ENSG00000148344 | 20  | 39 -  | 8.12E-05 | TCTCCGGGTGTCCCGGACCC  |
| ESR1 | ENSG00000175147 | 61  | 80 -  | 8.16E-05 | CAAGAAGGGGACCCCGGCCT  |
| ESR1 | ENSG00000100568 | 183 | 202 + | 8.27E-05 | CCCGCAGGTCCCCTAGGCC   |
| ESR1 | ENSG00000145014 | 238 | 257 + | 8.27E-05 | AGGAAGGGACGCCGTGCCTT  |
| ESR1 | ENSG00000109689 | 348 | 367 - | 8.27E-05 | CCCAGAGGCAAGCCTGCCTT  |
| ESR1 | ENSG00000125148 | 315 | 334 + | 8.31E-05 | CACCCGGTACACTGTGCCTT  |
| ESR1 | ENSG00000061938 | 19  | 38 +  | 8.42E-05 | TCCCTCTGGCAGCCTGGCCC  |
| ESR1 | ENSG00000251467 | 124 | 143 - | 8.46E-05 | GGCACAGTCCGCCAGCCCC   |
| ESR1 | ENSG00000212978 | 28  | 47 +  | 8.50E-05 | GGACGACGTCAACATGTCCT  |
| ESR1 | ENSG00000226800 | 172 | 191 + | 8.54E-05 | CCCGGGGGTCCGCCAGACTC  |
| ESR1 | ENSG00000250174 | 246 | 265 + | 8.58E-05 | ATTGAAGGTCAGCTTGTCTT  |
| ESR1 | ENSG00000064763 | 180 | 199 + | 8.62E-05 | GCGCGCGGCCCGCCTGCCCA  |
| ESR1 | ENSG00000152503 | 125 | 144 + | 8.62E-05 | CGGCGCTGGCAGCCAGCCCC  |
| ESR1 | ENSG00000084676 | 303 | 322 + | 8.66E-05 | CCCCGACGACGCCGTGACCT  |
| ESR1 | ENSG00000066651 | 135 | 154 - | 8.66E-05 | TGGGAGGGGCTTCTCACCTT  |
| ESR1 | ENSG00000176444 | 316 | 335 - | 8.70E-05 | GGGCGGGGGGTCCAGACCTT  |
| ESR1 | ENSG00000151491 | 314 | 333 + | 8.70E-05 | CGGGATGGGGTCCCTGTCCC  |
| ESR1 | ENSG00000129515 | 145 | 164 - | 8.74E-05 | GCCTAAGGACGGCCCCGCC   |
| ESR1 | ENSG00000249319 | 227 | 246 + | 8.74E-05 | AGTCCTGGGGAGCCAGTCCC  |
| ESR1 | ENSG00000143776 | 161 | 180 - | 8.90E-05 | CGGCCTGGCCCCCGGCC     |
| ESR1 | ENSG00000090905 | 25  | 44 +  | 8.90E-05 | GGCTGGGTGCAGCGTGACAC  |
| ESR1 | ENSG00000180385 | 307 | 326 + | 8.90E-05 | AGGTCAGGGGATCGAGACCA  |
| ESR1 | ENSG00000078319 | 290 | 309 - | 9.03E-05 | TGACAATGTCACCTTCACTC  |
| ESR1 | ENSG00000109079 | 1   | 20 -  | 9.11E-05 | GTACCGGTGTCGCTGACCC   |
| ESR1 | ENSG00000186868 | 260 | 279 + | 9.11E-05 | CGCGGAGGCCGCGCTGCCCG  |
| ESR1 | ENSG00000161642 | 61  | 80 -  | 9.15E-05 | GCGAGGGGGCGTCTGGCCC   |
| ESR1 | ENSG00000139988 | 173 | 192 + | 9.15E-05 | TGATCAGCTCATCGTAACCT  |
| ESR1 | ENSG00000175110 | 345 | 364 - | 9.15E-05 | CCCAGAGGTCCCTCCTGAGCT |
| ESR1 | ENSG00000257077 | 156 | 175 + | 9.15E-05 | GGACATGGACTGCCTCACCT  |
| ESR1 | ENSG00000080815 | 255 | 274 - | 9.19E-05 | ACCCCGGAGCTGCCTGTCCC  |
| ESR1 | ENSG00000258011 | 215 | 234 + | 9.23E-05 | CTCGAAGTCCAGCCAGCCCT  |
| ESR1 | ENSG00000234271 | 179 | 198 - | 9.23E-05 | TTCTTCTCACCTGTCTT     |
| ESR1 | ENSG00000253172 | 201 | 220 + | 9.28E-05 | GGGGCGGGGCTAGCTGCCTC  |
| ESR1 | ENSG00000251447 | 302 | 321 - | 9.32E-05 | GAGCCACCGCACCCAGCCCT  |
| ESR1 | ENSG00000105519 | 196 | 215 + | 9.36E-05 | TGGCTCTGCCACCCTGCCAC  |
| ESR1 | ENSG00000244078 | 183 | 202 + | 9.36E-05 | CTTATCTGGCACCCCTGGCCT |
| ESR1 | ENSG00000151466 | 35  | 54 +  | 9.36E-05 | CTACCTGGAGACTGTCCC    |
| ESR1 | ENSG00000224680 | 39  | 58 -  | 9.40E-05 | AGGCAGGGCCTCGCTGGCTT  |
| ESR1 | ENSG00000174791 | 5   | 24 -  | 9.40E-05 | AGGCTCTGCCAGCCTGCCTT  |
| ESR1 | ENSG00000246982 | 382 | 401 - | 9.40E-05 | GGGCGGGGGCATCGGGGCCT  |
| ESR1 | ENSG00000115661 | 262 | 281 + | 9.45E-05 | GAGCCAGGTCAGTCCGGCAG  |

|      |                 |     |       |          |                       |
|------|-----------------|-----|-------|----------|-----------------------|
| ESR1 | ENSG00000163521 | 144 | 163 - | 9.45E-05 | GAGCCAGGTCAGTCCGGCAG  |
| ESR1 | ENSG00000023839 | 78  | 97 +  | 9.53E-05 | CTGGTGAGTCTCCCTGTCCC  |
| ESR1 | ENSG00000254460 | 105 | 124 + | 9.53E-05 | TGCCTGGGGCTCTCTGAGCC  |
| ESR1 | ENSG00000258466 | 75  | 94 +  | 9.53E-05 | AGGCCTGCTCACCACGACTC  |
| ESR1 | ENSG00000255329 | 317 | 336 - | 9.58E-05 | CGTCCAGGACTGATTGTCCT  |
| ESR1 | ENSG00000214167 | 96  | 115 - | 9.58E-05 | GATCAAGGCCAGGCAGCCTC  |
| ESR1 | ENSG00000145868 | 100 | 119 - | 9.58E-05 | AGCCATGTTTCAGCGTGGCAT |
| ESR1 | ENSG00000230870 | 353 | 372 - | 9.62E-05 | GTCCATGGTGATAATGACAC  |
| ESR1 | ENSG00000256813 | 41  | 60 -  | 9.67E-05 | GCCTTCAGTGACCCTGGCCT  |
| ESR1 | ENSG00000100811 | 12  | 31 +  | 9.67E-05 | CGCCGAGCTCGCGCCGACCC  |
| ESR1 | ENSG00000075292 | 4   | 23 +  | 9.67E-05 | ACCTTAGGCCTCACAGACCT  |
| ESR1 | ENSG00000143158 | 159 | 178 + | 9.71E-05 | CAGACCCGGCAGCGTGCCCC  |
| ESR1 | ENSG00000215845 | 181 | 200 - | 9.71E-05 | AAGCAAGGGCACCGCCTCCC  |
| ESR1 | ENSG00000110536 | 201 | 220 + | 9.71E-05 | CTCCGAGGCCGCCGGGCCCT  |
| ESR1 | ENSG00000214941 | 214 | 233 + | 9.71E-05 | ACTCCGTCTCGCCCTGCCCC  |
| ESR1 | ENSG00000149089 | 279 | 298 + | 9.75E-05 | CGCCCCGTTTCGCCCCGCCCC |
| ESR1 | ENSG00000172113 | 239 | 258 + | 9.75E-05 | CGCCGAGGGCGCCAGGCCG   |
| ESR1 | ENSG00000145425 | 35  | 54 -  | 9.75E-05 | GACCAAGGCGTCGGTGGCCT  |
| ESR1 | ENSG00000109685 | 369 | 388 - | 9.80E-05 | CAGCCCGGCCTCCCGCCCC   |
| ESR1 | ENSG00000198042 | 200 | 219 + | 9.80E-05 | AGGAGCGGGGACCCAGCCCC  |
| ESR1 | ENSG00000107201 | 346 | 365 + | 9.80E-05 | AGCAGAGGCCGGCATGACCA  |
| ESR1 | ENSG00000157654 | 54  | 73 +  | 9.80E-05 | GCGCCGGGCTAGCGCGCCCT  |
| ESR1 | ENSG00000116783 | 139 | 158 - | 9.84E-05 | CGCCCGTTGTTTCTGACCC   |
| ESR1 | ENSG00000130813 | 26  | 45 +  | 9.84E-05 | GGCCAGGTCCTCATGAGCG   |
| ESR1 | ENSG00000197128 | 370 | 389 - | 9.84E-05 | CGGCTAGGTCACTCAGGCAG  |
| ESR1 | ENSG00000175029 | 60  | 79 +  | 9.89E-05 | GGCCCTGCCACCGAGGCC    |
| ESR1 | ENSG00000166548 | 322 | 341 - | 9.89E-05 | GGCGCTGGCCTGCGTGCCCA  |
| ESR1 | ENSG00000254788 | 18  | 37 +  | 9.89E-05 | GGCGCTGGCCTGCGTGCCCA  |
| ESR1 | ENSG00000236869 | 271 | 290 - | 9.89E-05 | GCTACGGGGCGCCCGCCCC   |
| ESR1 | ENSG00000257809 | 26  | 45 +  | 9.98E-05 | TGCTCAGCTCTCCGGGACCT  |
| ESR1 | ENSG00000135414 | 208 | 227 + | 0.0001   | CCCCCAGTCTCCCTCCCCT   |
| ESR1 | ENSG00000241404 | 156 | 175 + | 0.0001   | ATGGGAGGACTCTCTGGCCC  |
| ESR1 | ENSG00000122432 | 267 | 286 - | 0.0001   | GAGTCGGGTTCGCGCTAGCCT |
| ESR1 | ENSG00000174516 | 184 | 203 - | 0.0001   | TTCGAGGAGACCACGCCCT   |
| ESR1 | ENSG00000171853 | 149 | 168 + | 0.0001   | CACCTAGGGCTCCAGGCCCC  |
| ESR1 | ENSG00000177725 | 253 | 272 - | 0.0001   | TTCACAGGCCACACTCCCCA  |
| ESR1 | ENSG00000168807 | 367 | 386 + | 0.0001   | GAGCGGGGAGAGCCTGAGCC  |
| ESR1 | ENSG00000183426 | 53  | 72 +  | 0.0001   | CAGCCGGGCCAACCTCAGCC  |
| ESR1 | ENSG00000064489 | 326 | 345 - | 0.0001   | GGCCTTTGTCAGGCCGCCCC  |
| ESR1 | ENSG00000166997 | 157 | 176 - | 0.0001   | GCTACGGGTTTCCCTGCCTC  |
| ESR1 | ENSG00000163291 | 135 | 154 + | 0.0001   | GCGCCCCAGCACCTGCCCC   |
| ESR1 | ENSG00000112079 | 93  | 112 + | 0.0001   | ACCCAGGTCCAGCCAGCCCT  |
| ESR1 | ENSG00000234336 | 271 | 290 + | 0.0001   | ATTCCGGGGTCCCCGCCCG   |
| ESR1 | ENSG00000063177 | 347 | 366 - | 0.00011  | GTCGGGGGCCTCTCTGGCCC  |
| ESR1 | ENSG00000167608 | 29  | 48 +  | 0.00011  | GCACAAAGGCATCCTGTCCG  |
| ESR1 | ENSG00000188818 | 123 | 142 + | 0.00011  | CCCTCTGCTCAGTGTGGCCT  |
| ESR1 | ENSG00000104325 | 126 | 145 - | 0.00011  | ACGCCAGCGGCCCTGACCT   |
| ESR1 | ENSG00000224665 | 16  | 35 -  | 0.00011  | CGGCCAGGCCTACCCACCC   |
| ESR1 | ENSG00000228021 | 307 | 326 - | 0.00011  | CCCCCAAATCATCTTGTCT   |
| ESR1 | ENSG00000174775 | 162 | 181 - | 0.00011  | GTGGCGGTCACCTCCCCT    |

|      |                 |     |       |         |                       |
|------|-----------------|-----|-------|---------|-----------------------|
| ESR1 | ENSG00000175197 | 102 | 121 + | 0.00011 | GGCCAATGCCGGCGTGCCAC  |
| ESR1 | ENSG00000141753 | 69  | 88 -  | 0.00011 | GGGGGAGGGGGCGCTGTCCCT |
| ESR1 | ENSG00000205794 | 174 | 193 + | 0.00011 | CCGTCCGGGCAGCCGGGCC   |
| ESR1 | ENSG00000143416 | 324 | 343 + | 0.00011 | TTGCCTGCTCTGTCTGCCCC  |
| ESR1 | ENSG00000175344 | 5   | 24 -  | 0.00011 | CGCTCCGGGCACCTCCACCC  |
| ESR1 | ENSG00000179409 | 293 | 312 - | 0.00011 | GGGGAGAGGGACTCTGTCCCT |
| ESR1 | ENSG00000166526 | 95  | 114 + | 0.00011 | TCTCCAGGACACGGTCACTT  |
| ESR1 | ENSG00000247670 | 116 | 135 - | 0.00011 | CGCGCCGGCGACCTCGACCC  |
| ESR1 | ENSG00000111335 | 172 | 191 + | 0.00011 | AGTTTTGGTTTCCCTGCCCC  |
| ESR1 | ENSG00000134905 | 54  | 73 -  | 0.00011 | CGGCCAGCGGAGCGCGCCCC  |
| ESR1 | ENSG00000114670 | 270 | 289 - | 0.00011 | AACTAGGGGCAACCACACCC  |
| ESR1 | ENSG00000234353 | 168 | 187 + | 0.00011 | GGAGCAAGTCAACTTGGCTT  |
| ESR1 | ENSG00000173402 | 229 | 248 - | 0.00011 | GTTTGAGACCAGCCTGACCA  |
| ESR1 | ENSG00000122565 | 118 | 137 + | 0.00011 | CAGCCTGGAGATCCAGCCCC  |
| ESR1 | ENSG00000084112 | 296 | 315 - | 0.00011 | CTGCAGGGTCACCAGGGCCA  |
| ESR1 | ENSG00000185633 | 7   | 26 +  | 0.00011 | GCCCCAGGTGTGTCCGACTC  |
| ESR1 | ENSG00000187109 | 208 | 227 - | 0.00011 | AGGCCTGGCCCGCGTGCCCG  |
| ESR1 | ENSG00000102572 | 136 | 155 + | 0.00011 | GACCCGCTTCATCTGACTT   |
| ESR1 | ENSG00000189050 | 169 | 188 - | 0.00011 | GCGCGCGCGCGCCCTGCCCC  |
| ESR1 | ENSG00000221025 | 135 | 154 + | 0.00011 | CCCAGAGTCCTCCCTGCCCC  |
| ESR1 | ENSG00000173585 | 185 | 204 - | 0.00011 | AAGCCAGGCCACCCCTGCCT  |
| ESR1 | ENSG00000010030 | 217 | 236 - | 0.00011 | GTCTCAGCTCCCCCTGTCTC  |
| ESR1 | ENSG00000221267 | 305 | 324 + | 0.00011 | CTATCAGAGCAGCCTGTCAT  |
| ESR1 | ENSG00000164542 | 364 | 383 + | 0.00011 | GTCTCAGCTCAGTGTGTCTC  |
| ESR1 | ENSG00000137055 | 34  | 53 -  | 0.00011 | CTGTTAGGTCATCTCACTG   |
| ESR1 | ENSG00000085831 | 127 | 146 - | 0.00011 | GACCTGCGCTCCCTGCCCC   |
| ESR1 | ENSG00000084234 | 268 | 287 - | 0.00011 | CGCTTAGCACACCGCGACCC  |
| ESR1 | ENSG00000184182 | 226 | 245 - | 0.00011 | GCGACGGGCCTCTCGGACCT  |
| ESR1 | ENSG00000114473 | 214 | 233 - | 0.00011 | CTAGCGGGTGACGCTGTCCA  |
| ESR1 | ENSG00000156931 | 360 | 379 + | 0.00011 | GCGACAGGTCTCTGAGCCTC  |
| ESR1 | ENSG00000163743 | 36  | 55 -  | 0.00011 | GACACACTCCACCATGACCT  |
| ESR1 | ENSG00000225721 | 6   | 25 -  | 0.00011 | GCACCGAGTCACAGTGGCTC  |
| ESR1 | ENSG00000120805 | 203 | 222 + | 0.00011 | TGCTCAGGCCACCGTTCCCG  |
| ESR1 | ENSG00000144401 | 297 | 316 + | 0.00011 | GACTAGAGTGACCATGCCTT  |
| ESR1 | ENSG00000233436 | 8   | 27 +  | 0.00012 | TACCAGGGTCAGTCAGGCTC  |
| ESR1 | ENSG00000151164 | 238 | 257 + | 0.00012 | GAAACGGAGGACCGTGCCCC  |
| ESR1 | ENSG00000103037 | 255 | 274 - | 0.00012 | CGCCTGGGTGCGCCATGGTCT |
| ESR1 | ENSG00000242515 | 277 | 296 + | 0.00012 | GCGCAGGGTGGACCAGCCCC  |
| ESR1 | ENSG00000130714 | 174 | 193 + | 0.00012 | CACGCGGTCACCCTCTCCC   |
| ESR1 | ENSG00000091039 | 225 | 244 - | 0.00012 | CTTTCTGGGCACCCAGAACC  |
| ESR1 | ENSG00000182199 | 242 | 261 - | 0.00012 | ACTCCAGGAGATCTAGACCC  |
| ESR1 | ENSG00000159199 | 270 | 289 + | 0.00012 | CTGGGAGGTGAGTCTGTAC   |
| ESR1 | ENSG00000112576 | 80  | 99 +  | 0.00012 | GGGGCGGGGCGGCGTGCGCC  |
| ESR1 | ENSG00000251154 | 109 | 128 - | 0.00012 | CCGCCAGAGACTGTGACCT   |
| ESR1 | ENSG00000231563 | 145 | 164 + | 0.00012 | GGCCAAGGTCAGAATGATTG  |
| ESR1 | ENSG00000083454 | 300 | 319 - | 0.00012 | CTCCCCTGACACAGTGACAC  |
| ESR1 | ENSG00000131759 | 83  | 102 + | 0.00012 | CGCTCTGCGCCCCGCTGACCC |
| ESR1 | ENSG00000167081 | 369 | 388 + | 0.00012 | GGTGCAGGGGGGCATGGCCC  |
| ESR1 | ENSG00000171097 | 141 | 160 - | 0.00012 | CCCCCATGTCCCCTGTGTCAT |
| ESR1 | ENSG00000171163 | 123 | 142 + | 0.00012 | GCCGCGGGGCTCCGCGACAC  |

|      |                 |     |       |         |                      |
|------|-----------------|-----|-------|---------|----------------------|
| ESR1 | ENSG00000095002 | 308 | 327 + | 0.00012 | GGGTGTGGTCGCCGTGGCCG |
| ESR1 | ENSG00000147813 | 158 | 177 - | 0.00012 | AGGACAGACCAGCCAGACTC |
| ESR1 | ENSG00000161970 | 305 | 324 - | 0.00012 | GTCGGAAGCCACCATGCCCA |
| ESR1 | ENSG00000127616 | 94  | 113 + | 0.00012 | CCTCCGGGCCACGCCACCC  |
| ESR1 | ENSG00000199719 | 203 | 222 - | 0.00012 | CATCCAGATCGCCCTCACAT |
| ESR1 | ENSG00000161813 | 134 | 153 + | 0.00012 | CGCCAGGCTACAGTGCCT   |
| ESR1 | ENSG00000257613 | 281 | 300 - | 0.00012 | ATGAGTGGGCATAATGCCCT |
| ESR1 | ENSG00000234750 | 237 | 256 + | 0.00012 | GGCCCTGGGGACCCTGGGAT |
| ESR1 | ENSG00000202441 | 161 | 180 - | 0.00012 | CAGCAGGGTGTCTCTGAACT |
| ESR1 | ENSG00000149485 | 101 | 120 - | 0.00012 | TGCCAAGAACACCCTTCCCT |
| ESR1 | ENSG00000124279 | 300 | 319 - | 0.00012 | CGCCAGGTCTTTGACACCC  |
| ESR1 | ENSG00000243350 | 54  | 73 -  | 0.00012 | GCCCCCGCTCGCCCCGCCCC |
| ESR1 | ENSG00000118260 | 217 | 236 + | 0.00012 | CGCCGGGCTCAGCCCCGCTT |
| ESR1 | ENSG00000223725 | 224 | 243 - | 0.00012 | CGCCGGGCTCAGCCCCGCTT |
| ESR1 | ENSG00000213760 | 281 | 300 - | 0.00012 | CGCCACGATGCCCTGCCCT  |
| ESR1 | ENSG00000105778 | 301 | 320 - | 0.00012 | GGCCACGGCCGCCCTTCCCT |
| ESR1 | ENSG00000115977 | 318 | 337 - | 0.00012 | TTCCTTAGGCAACCTGGCCC |
| ESR1 | ENSG00000100316 | 42  | 61 +  | 0.00012 | GTTCAAGACCAGCCTGGCCA |
| ESR1 | ENSG00000163762 | 378 | 397 - | 0.00012 | GTTCAAGACCAGCCTGGCCA |
| ESR1 | ENSG00000230340 | 128 | 147 + | 0.00012 | GTTCAAGACCAGCCTGGCCA |
| ESR1 | ENSG00000224892 | 62  | 81 -  | 0.00012 | GGCTCAGGTCCCCTCAGCT  |
| ESR1 | ENSG00000236383 | 378 | 397 - | 0.00012 | GTTGGAGACCAGCCTGACCA |
| ESR1 | ENSG00000248341 | 296 | 315 + | 0.00012 | CTTGAGGGGCCAGCTGACCC |
| ESR1 | ENSG00000064787 | 163 | 182 + | 0.00012 | TCCCCAGGTCAACCCGGCAG |
| ESR1 | ENSG00000240137 | 278 | 297 + | 0.00012 | GTCACCGATGTCCGTGACCT |
| ESR1 | ENSG00000213397 | 253 | 272 + | 0.00012 | GGTACCAGTCACCCAGCCAC |
| ESR1 | ENSG00000072518 | 137 | 156 - | 0.00013 | GTCCACGGCCATCCAGCCAC |
| ESR1 | ENSG00000259163 | 71  | 90 +  | 0.00013 | CCCCAAGCAGTCCCTGCCCC |
| ESR1 | ENSG00000161980 | 11  | 30 +  | 0.00013 | CAGCGAGGCCGCCAGCCAC  |
| ESR1 | ENSG00000217624 | 226 | 245 - | 0.00013 | CTGCTCGGCCAGTTTGCCT  |
| ESR1 | ENSG0000023191  | 26  | 45 +  | 0.00013 | CGCCCCCGGCACCAAGCCCC |
| ESR1 | ENSG00000207145 | 65  | 84 +  | 0.00013 | GTGAGATGTGATCCTGCCAC |
| ESR1 | ENSG00000221170 | 232 | 251 + | 0.00013 | GTGAGATGTGATCCTGCCAC |
| ESR1 | ENSG00000258168 | 243 | 262 + | 0.00013 | TAGCAGAGGGACTCTGGCCT |
| ESR1 | ENSG00000178297 | 323 | 342 + | 0.00013 | CAGCCTTGTCGTCTCACCC  |
| ESR1 | ENSG00000079819 | 71  | 90 +  | 0.00013 | CCCCCGGTCTCCGCGGCCG  |
| ESR1 | ENSG00000204427 | 298 | 317 - | 0.00013 | GGCCCCGCCCTCCCTGCCTC |
| ESR1 | ENSG00000233016 | 227 | 246 + | 0.00013 | GCGGGTGGGCCCGCTGACTT |
| ESR1 | ENSG00000228838 | 179 | 198 + | 0.00013 | GGAGAAGGGGAGCCTAGCCC |
| ESR1 | ENSG00000255990 | 300 | 319 - | 0.00013 | GAGCCAGGGCTCAGTGTGCT |
| ESR1 | ENSG00000120159 | 126 | 145 + | 0.00013 | CCCCCTGCCACCCCGCCCC  |
| ESR1 | ENSG00000249115 | 366 | 385 + | 0.00013 | GAGTGAGGACACCCACCCCT |
| ESR1 | ENSG00000125848 | 264 | 283 - | 0.00013 | CTGCAGGCTGAGCTTGTCT  |
| ESR1 | ENSG00000151093 | 365 | 384 - | 0.00013 | GGCCAGGGGCTCGGGACCC  |
| ESR1 | ENSG00000152464 | 136 | 155 - | 0.00013 | GGACCGGGTCCCCCACCCC  |
| ESR1 | ENSG00000228925 | 233 | 252 - | 0.00013 | TCTAGAGCTACCGTGCCAC  |
| ESR1 | ENSG00000230194 | 379 | 398 - | 0.00013 | ACCACAGGCCCTGCTGACAT |
| ESR1 | ENSG00000126217 | 8   | 27 -  | 0.00013 | CGATGGGAACAGCCTGCCCC |
| ESR1 | ENSG00000184635 | 309 | 328 - | 0.00013 | CCTGCAGGTACAGGGCCAC  |
| ESR1 | ENSG00000144554 | 294 | 313 - | 0.00013 | GCCGCAGGGGAGCGGGGCT  |

|      |                 |     |       |         |                      |
|------|-----------------|-----|-------|---------|----------------------|
| ESR1 | ENSG00000152977 | 81  | 100 + | 0.00013 | AGGCCAGGTGAGGCCGCGCC |
| ESR1 | ENSG00000251003 | 186 | 205 - | 0.00013 | CATCCGGTCCAGCATGACTC |
| ESR1 | ENSG00000139626 | 349 | 368 - | 0.00013 | GGACCAGGTGGGCCAGAGCT |
| ESR1 | ENSG00000105825 | 333 | 352 - | 0.00013 | ATGCACGGGGACTGTCACCC |
| ESR1 | ENSG00000234695 | 128 | 147 + | 0.00013 | ATGCACGGGGACTGTCACCC |
| ESR1 | ENSG00000253536 | 80  | 99 -  | 0.00014 | GAGTTGGGGTGCCTGACCT  |
| ESR1 | ENSG00000244697 | 49  | 68 +  | 0.00014 | GTTTGAGATCAGCCTGGCCA |
| ESR1 | ENSG00000116213 | 175 | 194 + | 0.00014 | CCCCTGTGTCGCTTGTCCC  |
| ESR1 | ENSG00000161618 | 36  | 55 -  | 0.00014 | GTGGCCGGGCACGATGGCTC |
| ESR1 | ENSG00000175309 | 92  | 111 - | 0.00014 | GTCCCGGACGACCCCGCCCC |
| ESR1 | ENSG00000170191 | 354 | 373 + | 0.00014 | CTCTCTGGGCAGTCCGCCTT |
| ESR1 | ENSG00000145040 | 349 | 368 + | 0.00014 | GACCCAGGGGACTCTGGGAT |
| ESR1 | ENSG00000233509 | 261 | 280 - | 0.00014 | CTACCAGGTCATTAGACGT  |
| ESR1 | ENSG00000189308 | 379 | 398 + | 0.00014 | GGGAAGGGGAACCGGCCCC  |
| ESR1 | ENSG00000168394 | 382 | 401 + | 0.00014 | GCGCAGGATCAGCCTGTTC  |
| ESR1 | ENSG00000228477 | 103 | 122 - | 0.00014 | TCCCAGGGCCACCAGGGCCT |
| ESR1 | ENSG00000114383 | 335 | 354 + | 0.00014 | TGCGCCGGCGGCCCTGACAT |
| ESR1 | ENSG00000128595 | 303 | 322 + | 0.00014 | CGGCCACGGCATCCTGTGCT |
| ESR1 | ENSG00000221978 | 335 | 354 - | 0.00014 | CCCGGAGTACAGCCTGTCCC |
| ESR1 | ENSG00000204311 | 295 | 314 - | 0.00014 | TCTTAAAGTGACCCAGCCCC |
| ESR1 | ENSG00000212464 | 378 | 397 - | 0.00014 | AGCCTGTGTCAGCCTGTCTG |
| ESR1 | ENSG00000198925 | 310 | 329 - | 0.00014 | GGCTCGGCTCGGCGCAGCCC |
| ESR1 | ENSG00000240950 | 15  | 34 +  | 0.00014 | AGCTAGGGGGATACTGCCAC |
| ESR1 | ENSG00000138794 | 356 | 375 - | 0.00014 | GCAGCCAGACACCTTGCCCT |
| ESR1 | ENSG00000184205 | 108 | 127 + | 0.00014 | TGGCCAGGCCGAGCGGACCC |
| ESR1 | ENSG00000021762 | 240 | 259 - | 0.00014 | GACCCTGCTCCGCGTGGCCT |
| ESR1 | ENSG00000256690 | 150 | 169 + | 0.00014 | CTAAGGCGCCACCGTGACCC |
| ESR1 | ENSG00000115841 | 342 | 361 - | 0.00014 | ATGGCAGCTGATACTGACTT |
| ESR1 | ENSG00000258227 | 311 | 330 - | 0.00014 | AGGCAGGGGCCCGTCTCCT  |
| ESR1 | ENSG00000243341 | 341 | 360 + | 0.00014 | CCTCAAGGCAGTCAGACAA  |
| ESR1 | ENSG00000169991 | 269 | 288 + | 0.00015 | CAGCCC GGCGGTGAGACCC |
| ESR1 | ENSG00000180929 | 44  | 63 +  | 0.00015 | GAGCAGGCTCTGGCTGACTC |
| ESR1 | ENSG00000168818 | 103 | 122 - | 0.00015 | AGGCACGTGGACGGTGACCC |
| ESR1 | ENSG00000241420 | 198 | 217 + | 0.00015 | GAGGCTGGGCGTACTGGCCT |
| ESR1 | ENSG00000154889 | 345 | 364 - | 0.00015 | CTCCCGCGCCGCGCTGCCCC |
| ESR1 | ENSG00000239737 | 252 | 271 - | 0.00015 | GGTTGAGATCGCTTTGACCC |
| ESR1 | ENSG00000102893 | 204 | 223 - | 0.00015 | GTCCCGGGGCTGCGCGCCAC |
| ESR1 | ENSG00000155506 | 331 | 350 - | 0.00015 | TGCCAAGGCCACGCTGTTTT |
| ESR1 | ENSG00000083097 | 314 | 333 + | 0.00015 | GGTAAAAGCGTCCCTGCCCC |
| ESR1 | ENSG00000198492 | 282 | 301 - | 0.00015 | GCTCACGGCCTCCCCGCCCC |
| ESR1 | ENSG00000117122 | 245 | 264 + | 0.00015 | CCCCGGGGACACCCCCCCCC |
| ESR1 | ENSG00000230953 | 324 | 343 - | 0.00015 | GGCCAAGGGCCCTTCCCCG  |
| ESR1 | ENSG00000129084 | 238 | 257 - | 0.00015 | CGGCCTGGGCACGCTGGGTC |
| ESR1 | ENSG00000080823 | 163 | 182 - | 0.00015 | TGCGCAGTGCAGCCCGTCCC |
| ESR1 | ENSG00000127663 | 200 | 219 - | 0.00015 | GTTGCTGGCGACCGAGCCCT |
| ESR1 | ENSG00000100412 | 290 | 309 - | 0.00015 | AGTAGGAGGCACCCCGCCCC |
| ESR1 | ENSG00000172936 | 302 | 321 - | 0.00015 | GAGAAGCGCCGCCCTGCCCT |
| ESR1 | ENSG00000157510 | 307 | 326 - | 0.00015 | GGCCCTCTTACCCTGGCCT  |
| ESR1 | ENSG00000140961 | 250 | 269 - | 0.00015 | GGGCATGGTGGCGGTACCT  |
| ESR1 | ENSG00000134508 | 306 | 325 + | 0.00015 | GTGTAAGGTCATTTTAGCCC |

|      |                 |     |       |         |                       |
|------|-----------------|-----|-------|---------|-----------------------|
| ESR1 | ENSG00000237765 | 104 | 123 - | 0.00015 | CGCCTGGGGCCCTCTGACAA  |
| ESR1 | ENSG00000179583 | 281 | 300 + | 0.00015 | GAGGAGGGGCTGCCAGACTC  |
| ESR1 | ENSG00000198003 | 72  | 91 +  | 0.00015 | AATCCTGGCCAGTCTCACTT  |
| ESR1 | ENSG00000010322 | 346 | 365 - | 0.00015 | GTCAGTCTTCTCTGGCCT    |
| ESR1 | ENSG00000177685 | 123 | 142 - | 0.00015 | TGGCCGGCTCGCCCAGTCCC  |
| ESR1 | ENSG00000244122 | 207 | 226 - | 0.00015 | AGGCCAGTCCACCCTGCACG  |
| ESR1 | ENSG00000248399 | 124 | 143 + | 0.00015 | GTCCCGGACTCCGTGGGCT   |
| ESR1 | ENSG00000184047 | 144 | 163 - | 0.00015 | GGCGCTGGCAACCCTGCCCCG |
| ESR1 | ENSG00000165792 | 212 | 231 - | 0.00015 | GGCCTGGTCACCGGCCCCA   |
| ESR1 | ENSG00000112715 | 112 | 131 - | 0.00015 | GGGACAGGCGAGCCTCAGCC  |
| ESR1 | ENSG00000230536 | 148 | 167 - | 0.00015 | CTGTCTATGGCAACCTGATCA |
| ESR1 | ENSG00000143321 | 14  | 33 -  | 0.00016 | TTTACAGATCACTTTGCCTT  |
| ESR1 | ENSG00000240210 | 335 | 354 + | 0.00016 | TGGACAGGATATCCAGCCCC  |
| ESR1 | ENSG00000166348 | 150 | 169 - | 0.00016 | GAGCCAAGGCAACCAGCTCT  |
| ESR1 | ENSG00000206535 | 337 | 356 - | 0.00016 | GCAAGAGGGCCATCTGCCTT  |
| ESR1 | ENSG00000258607 | 128 | 147 + | 0.00016 | CTATTTGGCCACCTTGCTT   |
| ESR1 | ENSG00000168066 | 21  | 40 +  | 0.00016 | AATCCCGGAGAAACTGCCCC  |
| ESR1 | ENSG00000182473 | 200 | 219 + | 0.00016 | GGCCCGGGCTCGCCTCACCT  |
| ESR1 | ENSG00000134014 | 139 | 158 + | 0.00016 | CTTCCAGGTCATCAGGTCAT  |
| ESR1 | ENSG00000078304 | 10  | 29 -  | 0.00016 | CCGGCCGGCCGCCCGCCCC   |
| ESR1 | ENSG00000136367 | 279 | 298 + | 0.00016 | TGGCCAGGGGAGCGAGGGCCG |
| ESR1 | ENSG00000258663 | 41  | 60 +  | 0.00016 | TCCAAGAGCCACCCTCCCCT  |
| ESR1 | ENSG00000131876 | 227 | 246 + | 0.00016 | GGCGCGGGGACGCTGGGAC   |
| ESR1 | ENSG00000244604 | 224 | 243 - | 0.00016 | GGCCCTTTTCAGCACGACCT  |
| ESR1 | ENSG00000130294 | 41  | 60 +  | 0.00016 | GAGCCGGGTGTCGGTCCCCC  |
| ESR1 | ENSG00000162441 | 353 | 372 - | 0.00016 | CTTCCGGGCTACCTGACAA   |
| ESR1 | ENSG00000229534 | 207 | 226 - | 0.00016 | TCTTTAGGAGACTCTGACTT  |
| ESR1 | ENSG00000122026 | 236 | 255 + | 0.00016 | CTTTCCGGGCTGTCTGACAC  |
| ESR1 | ENSG00000049883 | 317 | 336 + | 0.00016 | CTGTCTAGCTGCCGCTGCCCT |
| ESR1 | ENSG00000113645 | 37  | 56 -  | 0.00016 | GGGGAAGGAGAGACCGCCCC  |
| ESR1 | ENSG00000245281 | 300 | 319 + | 0.00016 | CCAGCAGGAAATCCTGCCCT  |
| ESR1 | ENSG00000256682 | 315 | 334 + | 0.00016 | CTGAAAGGTCTCCCTGATTG  |
| ESR1 | ENSG00000088876 | 128 | 147 - | 0.00016 | AGGCCCGCCCTCCCTGCCTT  |
| ESR1 | ENSG00000220739 | 4   | 23 +  | 0.00016 | GGGCAAAGACAACCTGAGAT  |
| ESR1 | ENSG00000231799 | 267 | 286 - | 0.00016 | TGGCAATGTCACCCCCCAT   |
| ESR1 | ENSG00000130702 | 40  | 59 -  | 0.00017 | CGGCCGGGCGGCCTTAACCC  |
| ESR1 | ENSG00000151743 | 378 | 397 + | 0.00017 | ACGGCGGGTCTAGTCAGCTCC |
| ESR1 | ENSG00000147099 | 339 | 358 - | 0.00017 | TCCCAGACCAGACTCCCCT   |
| ESR1 | ENSG00000238298 | 325 | 344 - | 0.00017 | TATTGAGGTCTACTTGACAT  |
| ESR1 | ENSG00000258559 | 275 | 294 - | 0.00017 | GGCATGAGCCACCATGCCCG  |
| ESR1 | ENSG00000124208 | 117 | 136 - | 0.00017 | CGGCGAGATCACGCCGCCCA  |
| ESR1 | ENSG00000116652 | 289 | 308 - | 0.00017 | TGGATAGGTTATCCTGTCTC  |
| ESR1 | ENSG00000175773 | 295 | 314 + | 0.00017 | CGGTGGAGCCTGCGTGACCC  |
| ESR1 | ENSG00000227638 | 37  | 56 +  | 0.00017 | ACAGAAGGACAGCTTGAGCC  |
| ESR1 | ENSG00000129226 | 173 | 192 + | 0.00017 | GACTGTTGACTTTGCCTT    |
| ESR1 | ENSG00000154783 | 344 | 363 + | 0.00017 | AAGCCCAGGCTGACTGCCCC  |
| ESR1 | ENSG00000211535 | 354 | 373 + | 0.00017 | GGGTCGGTTCAGCCTTGCTT  |
| ESR1 | ENSG00000249144 | 263 | 282 - | 0.00017 | GATTCTGGTGATAGTACTC   |
| ESR1 | ENSG00000167996 | 322 | 341 + | 0.00018 | TAGCCAGCCCTCCGTACCTT  |
| ESR1 | ENSG00000139163 | 160 | 179 + | 0.00018 | ATCGCAGGCCAACAAGCCCA  |

|      |                 |     |       |         |                      |
|------|-----------------|-----|-------|---------|----------------------|
| ESR1 | ENSG00000258376 | 179 | 198 - | 0.00018 | ACTCCTGGGCTCCCTGGGCT |
| ESR1 | ENSG00000007384 | 60  | 79 -  | 0.00018 | GGCAGGGGCCAATCTGCTCT |
| ESR1 | ENSG00000236939 | 258 | 277 - | 0.00018 | CGCCAGGGCCGCCTCCGCC  |
| ESR1 | ENSG00000180098 | 163 | 182 + | 0.00018 | CGCGGGGCTTCGAGCCCC   |
| ESR1 | ENSG00000231365 | 60  | 79 -  | 0.00018 | CAACGCGGTGAGCCTACCCC |
| ESR1 | ENSG0000012048  | 378 | 397 + | 0.00018 | CGCTCAGGAGGCCTTCACCC |
| ESR1 | ENSG00000218521 | 341 | 360 - | 0.00018 | GTAACAGTTTAGAGTGACCC |
| ESR1 | ENSG00000173988 | 215 | 234 + | 0.00018 | AGGGTGTGTCTCCTTGGCCT |
| ESR1 | ENSG00000237259 | 1   | 20 +  | 0.00018 | AAGGCATGGCACCTTCTCCC |
| ESR1 | ENSG00000099953 | 67  | 86 +  | 0.00018 | TGGAATGGGACCCTGCTCC  |
| ESR1 | ENSG00000213443 | 28  | 47 -  | 0.00018 | TGCACAAGTCCCCCTGCCTG |
| ESR1 | ENSG00000158092 | 182 | 201 + | 0.00018 | CGCGCGATCCGCCTGCCCA  |
| ESR1 | ENSG00000151725 | 259 | 278 + | 0.00018 | GGAGAGCGGCACCATGGCCC |
| ESR1 | ENSG00000066583 | 127 | 146 - | 0.00018 | CGGCGATGCCAGCCCCGCCG |
| ESR1 | ENSG00000137877 | 43  | 62 -  | 0.00018 | CTCCAGGACGCAGAGGCC   |
| ESR1 | ENSG00000126062 | 199 | 218 + | 0.00018 | AACCAAGGACTCCGTATCCC |
| ESR1 | ENSG00000164306 | 193 | 212 + | 0.00018 | ACCGCAGCGCGCCCCGCC   |
| ESR1 | ENSG00000169762 | 185 | 204 + | 0.00018 | AGCCTGGGGCACCTTCGCTC |
| ESR1 | ENSG00000167094 | 338 | 357 - | 0.00018 | AGCCTCGGTCTCTTGCTG   |
| ESR1 | ENSG00000254772 | 109 | 128 - | 0.00018 | GGGAAGGGGATTATGACCA  |
| ESR1 | ENSG00000108797 | 111 | 130 - | 0.00018 | CGCGCCGTTTCCCGGACCC  |
| ESR1 | ENSG00000135245 | 3   | 22 +  | 0.00018 | ACTCCAGAACACAATGACTC |
| ESR1 | ENSG00000233789 | 264 | 283 + | 0.00018 | AACCCAGGCCTATCAGACTC |
| ESR1 | ENSG00000100522 | 120 | 139 + | 0.00019 | GCCCCGCTCTCCGAGCCCC  |
| ESR1 | ENSG00000197114 | 206 | 225 - | 0.00019 | GCTCGAGGGTGCCGTGGCCC |
| ESR1 | ENSG00000216895 | 69  | 88 -  | 0.00019 | TTGTGGGGCCATCTGACAG  |
| ESR1 | ENSG00000171346 | 22  | 41 +  | 0.00019 | CCCAGCAGTGACCCAGACCT |
| ESR1 | ENSG00000161960 | 8   | 27 -  | 0.00019 | TGCGGAGGCGACAGTGCCTT |
| ESR1 | ENSG00000115657 | 349 | 368 - | 0.00019 | GGACCAGGCCTCACCGCCCA |
| ESR1 | ENSG00000251131 | 12  | 31 -  | 0.00019 | GGGTGCTGCGACCATGACCC |
| ESR1 | ENSG00000139173 | 138 | 157 - | 0.00019 | CGCGCAGGTGACCGCGATCA |
| ESR1 | ENSG00000155957 | 319 | 338 + | 0.00019 | ATCATGGCTGACCCCGACCC |
| ESR1 | ENSG00000143093 | 97  | 116 + | 0.00019 | CAGCAGTTCTTTATGACCT  |
| ESR1 | ENSG00000233611 | 257 | 276 - | 0.00019 | CGGCAAAGGCTTCTTGCCA  |
| ESR1 | ENSG00000126522 | 378 | 397 - | 0.00019 | CCCCGGGCCGGGCTGGCTC  |
| ESR1 | ENSG00000233937 | 134 | 153 + | 0.00019 | GTCCGGCCCCACCTGCCCC  |
| ESR1 | ENSG00000256175 | 292 | 311 + | 0.00019 | GACCCAGGCCTTCTGTCTC  |
| ESR1 | ENSG00000182481 | 286 | 305 + | 0.00019 | GCCCTATGACTCCCTCCCCT |
| ESR1 | ENSG00000255773 | 170 | 189 - | 0.00019 | GAGGCAGGGGACCCAGGTCT |
| ESR1 | ENSG00000119638 | 53  | 72 +  | 0.00019 | GGCGTGAGCCACCTTGCCCG |
| ESR1 | ENSG00000189376 | 322 | 341 - | 0.00019 | GACGCGGGCGGTCTGACCG  |
| ESR1 | ENSG00000234134 | 283 | 302 + | 0.00019 | TGGAAGGCGAGCCAGCCAT  |
| ESR1 | ENSG00000116857 | 362 | 381 - | 0.0002  | AGGCTGGGTCTTCTGATCC  |
| ESR1 | ENSG00000143379 | 120 | 139 + | 0.0002  | GGCCACGCCTACTTGCCCT  |
| ESR1 | ENSG00000121671 | 333 | 352 - | 0.0002  | CGCCGGGTGGAGCTGGCAT  |
| ESR1 | ENSG00000149564 | 282 | 301 - | 0.0002  | GCCGCGGGACGCACGGACCT |
| ESR1 | ENSG00000168000 | 92  | 111 + | 0.0002  | CTCAAAGGGAGCCTCTCCT  |
| ESR1 | ENSG00000243902 | 7   | 26 -  | 0.0002  | CCGCCGCTCCCGGTGCCCT  |
| ESR1 | ENSG00000099622 | 218 | 237 + | 0.0002  | GGCGAGGGCCTGCCTGCCTG |
| ESR1 | ENSG00000163590 | 218 | 237 - | 0.0002  | GGCTGGGCTCTGCCTGCCTC |

|      |                 |     |       |          |                       |
|------|-----------------|-----|-------|----------|-----------------------|
| ESR1 | ENSG00000244513 | 53  | 72 +  | 0.0002   | GGGCCAGGGCGCGGGGCCCG  |
| ESR1 | ENSG00000226363 | 18  | 37 +  | 0.0002   | GATCTTGGGCAAATGTCCT   |
| ESR1 | ENSG00000151150 | 212 | 231 - | 0.0002   | CGCCAGCGCGGCCTATCCT   |
| ESR1 | ENSG00000129083 | 328 | 347 + | 0.0002   | GTGCTAGGTGGCTGTGGCTT  |
| ESR1 | ENSG00000174483 | 41  | 60 +  | 2.00E-04 | TGAAAGGTGGCTCTGACTG   |
| ESR1 | ENSG00000257264 | 188 | 207 + | 2.00E-04 | GGCAAGAGTCACCACGCCCA  |
| ESR1 | ENSG00000112096 | 180 | 199 - | 2.00E-04 | GGCTGGGGTCGGGCTGTAC   |
| ESR1 | ENSG00000204775 | 172 | 191 + | 2.00E-04 | AGGCCAGCACTCCTTGCCCG  |
| ESR1 | ENSG00000253502 | 315 | 334 - | 2.00E-04 | ATTCAATTTAGCCTGAACT   |
| ESR1 | ENSG00000253950 | 105 | 124 - | 0.0002   | CTGCGGGCTCACCGTGGTCT  |
| ESR1 | ENSG00000186501 | 97  | 116 - | 0.0002   | GGGCCCCGCCAGCCCCGCC   |
| ESR1 | ENSG00000119640 | 174 | 193 - | 0.0002   | GGGTCAAGTGACCTTGGGCT  |
| ESR1 | ENSG00000248546 | 235 | 254 - | 0.0002   | ATCAGAGGGCGCCCTGTTC   |
| ESR1 | ENSG00000139351 | 51  | 70 +  | 0.0002   | CGGCCAAAGCACCTGGGCC   |
| ESR1 | ENSG00000240216 | 143 | 162 - | 0.00021  | CACCCAGAACACTGTTACCT  |
| ESR1 | ENSG00000151468 | 309 | 328 - | 0.00021  | ATCCGGGGGCAGCTTCCCTC  |
| ESR1 | ENSG00000124942 | 232 | 251 - | 0.00021  | CACCCCAGTCTCTGTGCCAT  |
| ESR1 | ENSG00000176533 | 263 | 282 - | 0.00021  | GTTTCGCGGGCGCCCTTACCT |
| ESR1 | ENSG00000178922 | 69  | 88 +  | 0.00021  | GCCCTCGGGCAGCCAGCTCT  |
| ESR1 | ENSG00000152457 | 251 | 270 + | 0.00021  | CGGCTGGGGCCACCTGCTCT  |
| ESR1 | ENSG00000179988 | 10  | 29 +  | 0.00021  | CAGTCAGGCCAGCCCAGCCC  |
| ESR1 | ENSG00000162174 | 295 | 314 - | 0.00021  | GGACGCGGACGCCGAGACCT  |
| ESR1 | ENSG00000241839 | 368 | 387 + | 0.00021  | GGCTGGGGTCCTCGAGCCCC  |
| ESR1 | ENSG00000095139 | 259 | 278 - | 0.00021  | AGCTCTGGACCTGCTGCCCC  |
| ESR1 | ENSG00000092841 | 152 | 171 - | 0.00021  | GGGCTGGGGCACAATGAATC  |
| ESR1 | ENSG00000244468 | 338 | 357 - | 0.00021  | GTTTCGTGGTCTCGCTGGCTC |
| ESR1 | ENSG00000085563 | 121 | 140 + | 0.00021  | CTTCAAGCCTGCCTGCCTT   |
| ESR1 | ENSG00000000938 | 216 | 235 + | 0.00021  | CGTGACTGTCTCCCTGCCAC  |
| ESR1 | ENSG00000137710 | 264 | 283 + | 0.00021  | GGCGCCGGGCAGCCCCGCCT  |
| ESR1 | ENSG00000175175 | 24  | 43 -  | 0.00021  | AGCTCAGCCCACGCTGCCTA  |
| ESR1 | ENSG00000105662 | 294 | 313 - | 0.00021  | CTCGAAGGCCGCCGTCTCCT  |
| ESR1 | ENSG00000256898 | 254 | 273 + | 0.00021  | GAAACATGGCACTGTTACCT  |
| ESR1 | ENSG00000258790 | 152 | 171 - | 0.00021  | CCGACGGACGAGACTGACCC  |
| ESR1 | ENSG00000179256 | 114 | 133 - | 0.00021  | CTGCTGGGTCCCTCTGCCTG  |
| ESR1 | ENSG00000133943 | 109 | 128 + | 0.00021  | GGCCCCGCGCCCCAGCCCC   |
| ESR1 | ENSG00000067601 | 2   | 21 -  | 0.00021  | CAGGCCGGGCGCCGTGGCTC  |
| ESR1 | ENSG00000077157 | 7   | 26 -  | 0.00021  | CAGTGGGGTCACCTTTGCC   |
| ESR1 | ENSG00000033011 | 233 | 252 + | 0.00021  | GGGACGGGCGGCCGTGAGCT  |
| ESR1 | ENSG00000197381 | 276 | 295 - | 0.00021  | CACGCGGGTCCCGCCGGCCC  |
| ESR1 | ENSG00000239775 | 333 | 352 + | 0.00021  | CTCCAAGCCAGTGGGCCCC   |
| ESR1 | ENSG00000134759 | 155 | 174 + | 0.00022  | GGGCATGCGCAGTGCGACCC  |
| ESR1 | ENSG00000163467 | 332 | 351 - | 0.00022  | TCGACTGGTCACCTTTTCT   |
| ESR1 | ENSG00000111669 | 50  | 69 -  | 0.00022  | CGCCAGGATCATCCAACCC   |
| ESR1 | ENSG00000213782 | 379 | 398 + | 0.00022  | TGCTAGGCTCAGGGAGACCC  |
| ESR1 | ENSG00000197586 | 267 | 286 - | 0.00022  | GGCCGCGCCACCCCGGCCT   |
| ESR1 | ENSG00000230741 | 380 | 399 - | 0.00022  | AGGTTAGGTCACTACCCAC   |
| ESR1 | ENSG00000238278 | 305 | 324 + | 0.00022  | GGCCCCGGTAGGCCTGCCAT  |
| ESR1 | ENSG00000203279 | 182 | 201 + | 0.00022  | CAGAAAAGGCTCTCTCACCT  |
| ESR1 | ENSG00000255581 | 110 | 129 - | 0.00022  | ATCTCGGCTCACCGCAACCT  |
| ESR1 | ENSG00000136383 | 31  | 50 -  | 0.00022  | ATCTCGGCTCACCGCAACCT  |



|      |                 |     |       |         |                       |
|------|-----------------|-----|-------|---------|-----------------------|
| ESR1 | ENSG0000011198  | 212 | 231 + | 0.00022 | ATCTCGGCTCACCGCAACCT  |
| ESR1 | ENSG00000145016 | 101 | 120 + | 0.00022 | GGGCGGGGCCACCGACTCT   |
| ESR1 | ENSG00000143384 | 139 | 158 - | 0.00022 | GTTTTAGGGCGGCCAGTCT   |
| ESR1 | ENSG00000100385 | 220 | 239 - | 0.00022 | GAAGCAAGGCACCTTCACAT  |
| ESR1 | ENSG00000196670 | 377 | 396 - | 0.00022 | GGGAGGGGGCACGCTTACTC  |
| ESR1 | ENSG00000245148 | 196 | 215 - | 0.00022 | GCCTGAGGACACATTGCTCT  |
| ESR1 | ENSG00000119723 | 353 | 372 - | 0.00022 | CGCATAGCTCTCGCTGCCAC  |
| ESR1 | ENSG00000229212 | 359 | 378 + | 0.00022 | GGCCGAGACCGCCGTGCCCA  |
| ESR1 | ENSG00000112305 | 370 | 389 + | 0.00022 | AGGTGCGTTCACCTTGCCCCG |
| ESR1 | ENSG00000229628 | 243 | 262 + | 0.00022 | GGGATTGGACAGCATGAGCC  |
| ESR1 | ENSG00000107371 | 124 | 143 - | 0.00022 | GGCCGAGGTTAGCGAGGCCG  |
| ESR1 | ENSG00000122482 | 162 | 181 + | 0.00023 | AGCGCTGGGGGAGGTGACCT  |
| ESR1 | ENSG00000143569 | 189 | 208 + | 0.00023 | AGGGCGGGTCGGCCCGACTA  |
| ESR1 | ENSG00000185736 | 270 | 289 + | 0.00023 | TTCCCCGCCCTCCCTGACCA  |
| ESR1 | ENSG00000234608 | 316 | 335 - | 0.00023 | AGGTAAGGGGGAGGTGCCCC  |
| ESR1 | ENSG00000135722 | 352 | 371 - | 0.00023 | AAGTCGGGTCTTCTGCCGT   |
| ESR1 | ENSG00000185963 | 175 | 194 - | 0.00023 | CGCCGCCGCCGCCCTGCCCC  |
| ESR1 | ENSG00000228932 | 339 | 358 + | 0.00023 | CACACATGTCAGGCTGGCAA  |
| ESR1 | ENSG00000204209 | 197 | 216 - | 0.00023 | TTCCTTGCCATCTGACTC    |
| ESR1 | ENSG00000164129 | 14  | 33 -  | 0.00023 | GCCGGGGGCGTCCCAGACCT  |
| ESR1 | ENSG00000242761 | 61  | 80 -  | 0.00023 | GGCTCAAGTGATCCTCCAC   |
| ESR1 | ENSG00000253729 | 299 | 318 + | 0.00023 | GCTGCAGGAGACCTTGTCCG  |
| ESR1 | ENSG00000197989 | 312 | 331 - | 0.00023 | AGGTCAGGAGATCGAGACCA  |
| ESR1 | ENSG00000185201 | 275 | 294 - | 0.00023 | AGGTCAGGAGATCGAGACCA  |
| ESR1 | ENSG00000252494 | 20  | 39 -  | 0.00023 | AGGTCAGGAGATCGAGACCA  |
| ESR1 | ENSG00000242833 | 2   | 21 -  | 0.00023 | AGGTCAGGAGATCGAGACCA  |
| ESR1 | ENSG00000215791 | 179 | 198 - | 0.00023 | GAACCACGTCAGGGTGAACC  |
| ESR1 | ENSG00000148303 | 357 | 376 - | 0.00023 | CCTCGGTGTCTCCGTGCCAC  |
| ESR1 | ENSG00000235910 | 26  | 45 -  | 0.00023 | CGCCAAGGCCACCGAGCATC  |
| ESR1 | ENSG00000236507 | 353 | 372 - | 0.00023 | GGCCCAGCTCCCCTTTCCCT  |
| ESR1 | ENSG00000107771 | 233 | 252 - | 0.00024 | CTCCAAAGCCGCCGCGCCCC  |
| ESR1 | ENSG00000173465 | 250 | 269 + | 0.00024 | TGACAACGGCAACATGGCCC  |
| ESR1 | ENSG00000237416 | 377 | 396 + | 0.00024 | GACAAAGGTAAGTATGCTCT  |
| ESR1 | ENSG00000155269 | 105 | 124 + | 0.00024 | GGCCCAGCCCTCACTGGCCA  |
| ESR1 | ENSG00000213484 | 91  | 110 - | 0.00024 | GTTCGAGACCAGCCTGGCCA  |
| ESR1 | ENSG00000255354 | 345 | 364 + | 0.00024 | AGCTAAGGGCTCTCTGGCAG  |
| ESR1 | ENSG00000065923 | 206 | 225 - | 0.00024 | GTCCCGGGGCCCCCGCGCC   |
| ESR1 | ENSG00000242777 | 107 | 126 + | 0.00024 | GACCCTGTTGAACTTGACTC  |
| ESR1 | ENSG00000222383 | 15  | 34 -  | 0.00024 | GGGCTTGGTGGCTGTCACT   |
| ESR1 | ENSG00000156411 | 196 | 215 - | 0.00024 | AGAAAGGCTCACCTGGGCT   |
| ESR1 | ENSG00000228275 | 129 | 148 + | 0.00024 | CCCCACGCCACACCGACT    |
| ESR1 | ENSG00000256223 | 81  | 100 - | 0.00024 | CGTTCAGGCCACGCTCCGCC  |
| ESR1 | ENSG00000176208 | 129 | 148 - | 0.00024 | CGAGAGGGCCAAAATGACTC  |
| ESR1 | ENSG00000223960 | 165 | 184 - | 0.00024 | GGAGCAGGGCCGCGAGGCC   |
| ESR1 | ENSG00000100926 | 268 | 287 - | 0.00024 | GGCCAGTCCCACCCTGGCTC  |
| ESR1 | ENSG00000003509 | 111 | 130 + | 0.00024 | CTCCAAAGGCTCCTTGACTG  |
| ESR1 | ENSG00000115816 | 354 | 373 - | 0.00024 | CTCCAAAGGCTCCTTGACTG  |
| ESR1 | ENSG00000175066 | 263 | 282 - | 0.00024 | GTCCCCGGGCGGCCCAACCC  |
| ESR1 | ENSG00000254732 | 13  | 32 -  | 0.00024 | CACCCACGTCCCTCTCCCC   |
| ESR1 | ENSG00000166598 | 89  | 108 - | 0.00024 | TAGCCATGGCAACGTGTTCT  |

|      |                 |     |       |         |                       |
|------|-----------------|-----|-------|---------|-----------------------|
| ESR1 | ENSG00000238111 | 324 | 343 + | 0.00024 | AAGAAGGGTCTGCCTCCCTC  |
| ESR1 | ENSG00000160746 | 308 | 327 - | 0.00024 | TGACCGGGTCTGTACGCCTC  |
| ESR1 | ENSG00000130024 | 364 | 383 + | 0.00024 | CGGCCGTGCGACAGCGACCC  |
| ESR1 | ENSG00000165675 | 294 | 313 + | 0.00024 | CCGCGAGGGCACTACGAGCC  |
| ESR1 | ENSG00000125354 | 138 | 157 - | 0.00025 | CCCCTCGGTGACCACGTCCT  |
| ESR1 | ENSG00000258839 | 321 | 340 - | 0.00025 | GGTCTTGGTCCGAGTGGCCC  |
| ESR1 | ENSG00000242583 | 181 | 200 + | 0.00025 | CCCCAGGGTCCCCCTCTCCA  |
| ESR1 | ENSG00000240857 | 283 | 302 - | 0.00025 | GCCCCAGGGCCCACCGGCC   |
| ESR1 | ENSG00000238650 | 64  | 83 -  | 0.00025 | CGCCAATTCCCCCTCCCC    |
| ESR1 | ENSG00000213281 | 262 | 281 - | 0.00025 | CGCCCCGGCCACGTGGGCCT  |
| ESR1 | ENSG00000152465 | 170 | 189 - | 0.00025 | GAGCCCCGGGCGCTACGCCCC |
| ESR1 | ENSG00000233719 | 104 | 123 + | 0.00025 | CCTACTGTCCACCGTGGCCC  |
| ESR1 | ENSG00000166529 | 310 | 329 - | 0.00025 | CAGCCACGGCTCCCTCTCT   |
| ESR1 | ENSG00000147804 | 38  | 57 -  | 0.00025 | AGGGCTGGGCCCTTCCCCT   |
| ESR1 | ENSG00000204859 | 315 | 334 - | 0.00025 | AGGCAGGTCCTCCCTGAGCT  |
| ESR1 | ENSG00000147677 | 177 | 196 + | 0.00025 | TCGCCTGACCACCTTACCT   |
| ESR1 | ENSG00000110047 | 268 | 287 - | 0.00025 | CGCCGACCTCACACTCACCT  |
| ESR1 | ENSG00000249633 | 222 | 241 - | 0.00025 | AGGACAAAGGACCCAGACCC  |
| ESR1 | ENSG00000221656 | 115 | 134 - | 0.00025 | GTCCTGGGGCTCCCAGGCCG  |
| ESR1 | ENSG00000132394 | 40  | 59 +  | 0.00025 | AACCCTGCCTACGGTGACCT  |
| ESR1 | ENSG00000237779 | 250 | 269 + | 0.00025 | GCACCATGGCACCCCAGCCT  |
| ESR1 | ENSG00000218014 | 298 | 317 - | 0.00025 | GGCCAGTGATGCTGAGCG    |
| ESR1 | ENSG00000139211 | 373 | 392 - | 0.00025 | CGCGCGGGGCGCCCCGCTCC  |
| ESR1 | ENSG00000258657 | 145 | 164 + | 0.00026 | TGGGCATGAGAACTTGCCCC  |
| ESR1 | ENSG00000197548 | 355 | 374 - | 0.00026 | AAACCGGCCAGCAAGACCC   |
| ESR1 | ENSG00000241651 | 291 | 310 + | 0.00026 | TCCACAGGGTCCCCACCCC   |
| ESR1 | ENSG00000164742 | 257 | 276 - | 0.00026 | CCGGAGGAGCCGCGTGACCT  |
| ESR1 | ENSG00000244005 | 118 | 137 + | 0.00026 | GGGCTGGGTCGCTCAGCTCT  |
| ESR1 | ENSG00000250659 | 340 | 359 - | 0.00026 | CAGCCTGGGCAACATGGCAA  |
| ESR1 | ENSG00000118894 | 128 | 147 + | 0.00026 | CACGACGTTCTCTCTGACCC  |
| ESR1 | ENSG00000142794 | 149 | 168 + | 0.00026 | GACGCGGCCCATCCGACCC   |
| ESR1 | ENSG00000241635 | 271 | 290 + | 0.00026 | GCACAGGGTGGACCAGCCCC  |
| ESR1 | ENSG00000252150 | 100 | 119 - | 0.00026 | AGGCCTGCAGATCCTGGCCT  |
| ESR1 | ENSG00000227199 | 319 | 338 - | 0.00026 | GCGGCGAAGCCCCCTGACCC  |
| ESR1 | ENSG00000240429 | 214 | 233 - | 0.00026 | CTCCCGGCTCTGCGTGGCCG  |
| ESR1 | ENSG00000215301 | 167 | 186 + | 0.00026 | CGCCCCGGTCACCATCCTAC  |
| ESR1 | ENSG00000181222 | 101 | 120 + | 0.00026 | GGCCTGCGCAGGCGGCCCC   |
| ESR1 | ENSG00000243305 | 16  | 35 -  | 0.00026 | TGACCTGGTTAGGCTGGCTT  |
| ESR1 | ENSG00000120705 | 153 | 172 - | 0.00026 | TCTATTGGCTCTTGCCCC    |
| ESR1 | ENSG00000254872 | 329 | 348 - | 0.00026 | ACACATGGGCACCAGGACAC  |
| ESR1 | ENSG00000197892 | 94  | 113 + | 0.00026 | GGCCCCGCCACGACGACCC   |
| ESR1 | ENSG00000159423 | 131 | 150 + | 0.00026 | TTGGTGTGTACTIONGACTG  |
| ESR1 | ENSG00000236646 | 290 | 309 + | 0.00026 | TTGCCATGGGACCCTGTGAG  |
| ESR1 | ENSG00000166333 | 154 | 173 - | 0.00026 | TCCCACCGCTCCCTGCCCT   |
| ESR1 | ENSG00000164053 | 69  | 88 -  | 0.00026 | GACTCAGTGCGGCGCGACCC  |
| ESR1 | ENSG00000249540 | 355 | 374 + | 0.00026 | TACCAGGACACTGTGAGAT   |
| ESR1 | ENSG00000113758 | 289 | 308 - | 0.00027 | ATTCCAGGCCATTCTCAGCC  |
| ESR1 | ENSG00000136883 | 284 | 303 - | 0.00027 | GTTTCCGGCCCCCTTGCCCC  |
| ESR1 | ENSG00000234741 | 307 | 326 + | 0.00027 | CGGGCGGGGGAGCCAGCGCT  |
| ESR1 | ENSG00000180389 | 269 | 288 - | 0.00027 | AGCTGAGTCCAGCCTGTCTC  |

|      |                 |     |       |         |                       |
|------|-----------------|-----|-------|---------|-----------------------|
| ESR1 | ENSG00000103021 | 302 | 321 - | 0.00027 | GGTGAACGCTACCCTGACTT  |
| ESR1 | ENSG00000065328 | 299 | 318 + | 0.00027 | GGGCCGGGGCCGCCTCGCAC  |
| ESR1 | ENSG00000196588 | 29  | 48 -  | 0.00027 | CGAAAACGGCGGCCTGACTT  |
| ESR1 | ENSG00000225733 | 78  | 97 +  | 0.00027 | CCGCCAGGGCTCCCGCGCCC  |
| ESR1 | ENSG00000171497 | 241 | 260 - | 0.00027 | CGCCCGGGCCGCCAAACTC   |
| ESR1 | ENSG00000005022 | 340 | 359 + | 0.00027 | CGCCAAGGACTTCTGGCAG   |
| ESR1 | ENSG00000142875 | 309 | 328 + | 0.00027 | CGGCCCGGTCTTCGCGCCCG  |
| ESR1 | ENSG00000152061 | 306 | 325 + | 0.00027 | CTCTCAGTTCCTCCGCCT    |
| ESR1 | ENSG00000233108 | 311 | 330 + | 0.00027 | GAGCCGGGGCTCCGTCTCTC  |
| ESR1 | ENSG00000177628 | 161 | 180 + | 0.00027 | GAGGAAGGGCTCTGAGTCCC  |
| ESR1 | ENSG00000075151 | 362 | 381 + | 0.00027 | AGGTCCGGTCTCTCCGCCTC  |
| ESR1 | ENSG00000159128 | 251 | 270 + | 0.00027 | CAGCCTGGTGACTCCGTCTC  |
| ESR1 | ENSG00000127364 | 86  | 105 - | 0.00027 | GATCAAGGGCCACCTGATTT  |
| ESR1 | ENSG00000233221 | 153 | 172 + | 0.00027 | CGCGCAGGGCGCCGGGAGCC  |
| ESR1 | ENSG00000255857 | 293 | 312 + | 0.00028 | GTCCCGGTTCCCTGTGCCAC  |
| ESR1 | ENSG00000112655 | 156 | 175 - | 0.00028 | CCCGCACGGCGCCCCGCCCC  |
| ESR1 | ENSG00000230042 | 231 | 250 + | 0.00028 | ATCATGGGGGCCCCAGACCT  |
| ESR1 | ENSG00000111229 | 36  | 55 -  | 0.00028 | AGGGCCGGGCATAGTGGCTC  |
| ESR1 | ENSG00000160087 | 160 | 179 + | 0.00028 | TGCCTAGAGCGGCCAGCCCT  |
| ESR1 | ENSG00000213398 | 19  | 38 -  | 0.00028 | GCGCCAGGGGAAACAGAGCC  |
| ESR1 | ENSG00000153993 | 159 | 178 + | 0.00028 | GCAGCAGCGCCCCCTGCCTC  |
| ESR1 | ENSG00000145022 | 382 | 401 + | 0.00028 | GACTACGGTGACAGTACCCC  |
| ESR1 | ENSG00000126368 | 281 | 300 + | 0.00028 | TGCGCAGAGCCCTCTGTCCC  |
| ESR1 | ENSG00000248121 | 296 | 315 + | 0.00028 | CGGGCCAGTCAGACTGCGCC  |
| ESR1 | ENSG00000163918 | 325 | 344 + | 0.00028 | TCTTCAGATGTCTCTGCCCT  |
| ESR1 | ENSG00000140009 | 380 | 399 + | 0.00028 | CGCTCAGGTTACAGTCATCC  |
| ESR1 | ENSG00000159079 | 77  | 96 +  | 0.00028 | CGCCCTGGCCCTCCGTCTCCT |
| ESR1 | ENSG00000241830 | 12  | 31 -  | 0.00028 | GGGTTTGGGCTCCCTAGCCC  |
| ESR1 | ENSG00000175206 | 267 | 286 + | 0.00029 | GTGTGAGGCCAGCTTGAGCA  |
| ESR1 | ENSG00000131051 | 124 | 143 - | 0.00029 | GGCTCCGGCGACCGTAGCCC  |
| ESR1 | ENSG00000234740 | 62  | 81 +  | 0.00029 | GTGCGCGGGCGCCCTGGGCT  |
| ESR1 | ENSG00000241279 | 213 | 232 + | 0.00029 | GAGACAGGTTAGTTTTACCC  |
| ESR1 | ENSG00000254553 | 128 | 147 - | 0.00029 | ATCGCGGGAGCGCCTGGCCT  |
| ESR1 | ENSG00000235681 | 109 | 128 - | 0.00029 | ATCTCAGCTCACTGCAACCT  |
| ESR1 | ENSG00000256309 | 108 | 127 + | 0.00029 | GGGGAGGGGCCAGTGAGCT   |
| ESR1 | ENSG00000236474 | 69  | 88 -  | 0.00029 | GCTCAAAGGCACCTTGAAT   |
| ESR1 | ENSG00000259014 | 52  | 71 +  | 0.00029 | ATCTCAGCTCACTGCAACCT  |
| ESR1 | ENSG00000201448 | 49  | 68 -  | 0.00029 | GTTTAAGACCAGCCTGGCCA  |
| ESR1 | ENSG00000196498 | 93  | 112 - | 0.00029 | TGGCTCGGCCTCCCTGCTCC  |
| ESR1 | ENSG00000134321 | 85  | 104 - | 0.00029 | CGCTGAGGCGCCCATGGCCT  |
| ESR1 | ENSG00000244684 | 280 | 299 - | 0.00029 | GACACAGCACACTATAACCC  |
| ESR1 | ENSG00000175324 | 233 | 252 - | 0.00029 | GACCCCAGAGTCACTGACCT  |
| ESR1 | ENSG00000257851 | 264 | 283 + | 0.00029 | CAGGAAGAGGGCCATGACCC  |
| ESR1 | ENSG00000167491 | 219 | 238 - | 0.00029 | CTCGCGGCTCAGTCTCACAC  |
| ESR1 | ENSG00000232626 | 309 | 328 - | 0.00029 | CTTTCAGGTCATCTTCTCC   |
| ESR1 | ENSG00000174013 | 371 | 390 + | 0.00029 | GCAGCCGGTGCCTCTGCCT   |
| ESR1 | ENSG00000078487 | 131 | 150 + | 0.00029 | GCGATAGGTCATTATAACTC  |
| ESR1 | ENSG00000237996 | 244 | 263 + | 0.00029 | CACCCAGCCCTGAGTGACAT  |
| ESR1 | ENSG00000197429 | 253 | 272 - | 0.00029 | AACGCAGGCCCTCCTTACCC  |
| ESR1 | ENSG00000229638 | 83  | 102 - | 0.00029 | AATCATGATCATTCTGCCTT  |

|      |                 |     |       |          |                      |
|------|-----------------|-----|-------|----------|----------------------|
| ESR1 | ENSG00000047648 | 322 | 341 - | 0.00029  | CTCCAAAGACTGCGTGCCCA |
| ESR1 | ENSG00000198400 | 324 | 343 + | 0.0003   | CTGCGGACTCAGCCTGAGCT |
| ESR1 | ENSG00000182993 | 155 | 174 + | 0.0003   | CTCTTAGCGCCGCTTGACCC |
| ESR1 | ENSG00000114735 | 332 | 351 + | 0.0003   | CCCAAGGGTCAACCCACAC  |
| ESR1 | ENSG00000240793 | 170 | 189 - | 0.0003   | CAGCTTGCCAGTCTCACTC  |
| ESR1 | ENSG00000109180 | 102 | 121 - | 0.0003   | CTGCAATGCCCTTATGACCT |
| ESR1 | ENSG00000204498 | 17  | 36 +  | 0.0003   | TCCCCTGCTCACTCAGCCTC |
| ESR1 | ENSG00000256142 | 94  | 113 + | 0.0003   | ATCTCAGAGCACTTTGAACC |
| ESR1 | ENSG00000238868 | 10  | 29 +  | 0.0003   | CAGCTGTGTGAGCCTGCACT |
| ESR1 | ENSG00000129465 | 308 | 327 + | 3.00E-04 | ACCCCTGCACAGACAGACCC |
| ESR1 | ENSG00000119917 | 16  | 35 -  | 0.0003   | TTCTAAGGCCATACTACCA  |
| ESR1 | ENSG00000120533 | 180 | 199 - | 0.0003   | GGGCGGGGTCTCGCCACCTT |
| ESR1 | ENSG00000122952 | 168 | 187 + | 0.0003   | CGCGAAGTCGACTGTGACTT |
| ESR1 | ENSG00000122012 | 240 | 259 + | 0.0003   | TCCCCCGCGCGCCGTGACTC |
| ESR1 | ENSG00000117523 | 342 | 361 + | 0.0003   | ACCCAGCTTTCCCTCCCC   |
| ESR1 | ENSG00000115541 | 217 | 236 + | 0.00031  | GTGCTAGCGCGCTCAGCCCT |
| ESR1 | ENSG00000109189 | 237 | 256 + | 0.00031  | CCTCCCGGCTCCCTCTCCC  |
| ESR1 | ENSG00000230698 | 6   | 25 -  | 0.00031  | TGACAACGTCACAGTGGCAC |
| ESR1 | ENSG00000142949 | 83  | 102 - | 0.00031  | CCTCTTGGCCTCTCTGCCTT |
| ESR1 | ENSG00000166278 | 305 | 324 - | 0.00031  | GGCCAGGCGTGTCTCGCCC  |
| ESR1 | ENSG00000235590 | 311 | 330 + | 0.00031  | CCGTGGGGTCACTTCTCCTC |
| ESR1 | ENSG00000243243 | 53  | 72 +  | 0.00031  | GACTATGGAAAGCATGACCT |
| ESR1 | ENSG00000133112 | 278 | 297 + | 0.00031  | CGCGCGGCTTCTCGTGCCAC |
| ESR1 | ENSG00000242588 | 101 | 120 + | 0.00031  | ATCTGCGGCTTCGTGCCCC  |
| ESR1 | ENSG00000092470 | 101 | 120 + | 0.00032  | GCGCCTGGCCAAGGCGGCCT |
| ESR1 | ENSG00000237149 | 194 | 213 + | 0.00032  | GAGCTGAATCACTCCGACCC |
| ESR1 | ENSG00000182472 | 318 | 337 + | 0.00032  | GACCTGGGGTTTTCTGCCCC |
| ESR1 | ENSG00000240032 | 262 | 281 - | 0.00032  | AGTCCATCTCACAGTGACTA |
| ESR1 | ENSG00000137522 | 363 | 382 + | 0.00032  | TTGCAAGGGCACGGTACTCC |
| ESR1 | ENSG00000245532 | 72  | 91 +  | 0.00032  | CGCCTGGGAGACCATGCACC |
| ESR1 | ENSG00000119922 | 30  | 49 -  | 0.00032  | GGGTCTGGGGACATTGCTCT |
| ESR1 | ENSG00000114395 | 296 | 315 + | 0.00032  | GCGCCTGCGCAGCGCGACTC |
| ESR1 | ENSG00000249098 | 381 | 400 - | 0.00032  | GGCGGAGCTTACCGTGAGCC |
| ESR1 | ENSG00000235939 | 26  | 45 -  | 0.00032  | AAGTTAGGTCTCTGTCACTC |
| ESR1 | ENSG00000100600 | 228 | 247 + | 0.00032  | TCACCGCGGCACAGTGGCCC |
| ESR1 | ENSG00000140993 | 284 | 303 + | 0.00032  | TACCTCGGCCAGCTTGGCTT |
| ESR1 | ENSG00000250893 | 6   | 25 -  | 0.00032  | CATTCAGGTCCCCATCCCCG |
| ESR1 | ENSG00000112339 | 270 | 289 - | 0.00032  | CCACCATGACGTAGTGACCC |
| ESR1 | ENSG00000160062 | 96  | 115 - | 0.00032  | TCGCCCACTCCCCCTGCCCT |
| ESR1 | ENSG00000213707 | 160 | 179 + | 0.00032  | GCACTGGGCGACTGTGCCTC |
| ESR1 | ENSG00000228676 | 25  | 44 +  | 0.00032  | AAGTCAGGAGTTCGTGACCA |
| ESR1 | ENSG00000213703 | 202 | 221 - | 0.00032  | CTGCTTGGCCACAATGGCCG |
| ESR1 | ENSG00000235706 | 206 | 225 - | 0.00032  | GCCCCTGTCTCCCTGCTCC  |
| ESR1 | ENSG00000224055 | 171 | 190 + | 0.00032  | GTGCAGGGCCAGCTGCACCC |
| ESR1 | ENSG00000216324 | 330 | 349 - | 0.00032  | CTTCCAATTCACATTGCCTT |
| ESR1 | ENSG00000104388 | 145 | 164 - | 0.00033  | TGCCCGGTCCGCCCTGTCTT |
| ESR1 | ENSG00000199916 | 265 | 284 - | 0.00033  | AGGTCCGGGGACTTTCCCTT |
| ESR1 | ENSG00000124920 | 54  | 73 -  | 0.00033  | GGCCGCGGGCACCACGCTCC |
| ESR1 | ENSG00000184084 | 374 | 393 + | 0.00033  | GGACCTGCTGATACTGGCCC |
| ESR1 | ENSG00000249921 | 374 | 393 + | 0.00033  | CTGTGGGGTCACTCCCACTT |

|      |                 |     |       |         |                       |
|------|-----------------|-----|-------|---------|-----------------------|
| ESR1 | ENSG00000230116 | 338 | 357 + | 0.00033 | GACGCTAGTCACCAGGACTC  |
| ESR1 | ENSG00000248487 | 266 | 285 + | 0.00033 | AGCCTGGGCCAGCCTGTGCA  |
| ESR1 | ENSG00000238711 | 120 | 139 - | 0.00033 | ATCCCAGGGTTCCAAGGCC   |
| ESR1 | ENSG00000112419 | 33  | 52 -  | 0.00033 | AGCCCCGGGCACTGGCCCC   |
| ESR1 | ENSG00000237806 | 306 | 325 + | 0.00033 | TGGGAAGATCAACCTGTGCT  |
| ESR1 | ENSG00000111845 | 215 | 234 + | 0.00033 | GAGATATGCCTGCTTGCCCC  |
| ESR1 | ENSG00000170289 | 3   | 22 +  | 0.00033 | TCACAAGATCATTTTGACTC  |
| ESR1 | ENSG00000244134 | 152 | 171 + | 0.00033 | CACACATGTGACCATGAGTC  |
| ESR1 | ENSG00000254480 | 318 | 337 - | 0.00033 | GGCAAAGGGGCGTCAGCCCT  |
| ESR1 | ENSG00000231770 | 60  | 79 -  | 0.00033 | AAGGCCGGCGTTTCTGACCT  |
| ESR1 | ENSG00000110013 | 98  | 117 + | 0.00034 | GGA CTGAGCCATCCTGGCTT |
| ESR1 | ENSG00000184731 | 263 | 282 - | 0.00034 | GTCCCCGCCCCCCTCACCT   |
| ESR1 | ENSG00000175224 | 2   | 21 -  | 0.00034 | TGGCCGGCGCAATCAGACTT  |
| ESR1 | ENSG00000223442 | 143 | 162 - | 0.00034 | GTCAGAGGTGACGCAGGCAC  |
| ESR1 | ENSG00000179195 | 56  | 75 +  | 0.00034 | AATACAGGTCAGCATGAAAA  |
| ESR1 | ENSG00000198755 | 354 | 373 - | 0.00034 | CCCGCAGGCCGACCCGCCTT  |
| ESR1 | ENSG00000135114 | 192 | 211 - | 0.00034 | CCGTCTAGTCAATCTGTCAT  |
| ESR1 | ENSG00000235652 | 162 | 181 + | 0.00034 | GGGACGCGCACGCCGCCCT   |
| ESR1 | ENSG00000258283 | 366 | 385 - | 0.00034 | TAGCCATGTGAACTTGGCCA  |
| ESR1 | ENSG00000120068 | 318 | 337 - | 0.00034 | CGGCTCGCTCGCCCTCCCC   |
| ESR1 | ENSG00000100142 | 292 | 311 + | 0.00034 | AACTCAGGGGTCCCAACCC   |
| ESR1 | ENSG00000089127 | 42  | 61 +  | 0.00034 | CTTCCTGGTTTTTCTGACTT  |
| ESR1 | ENSG00000142330 | 11  | 30 -  | 0.00034 | GCCCAGGGCTATCCCGCCT   |
| ESR1 | ENSG00000147650 | 48  | 67 +  | 0.00034 | GCGCGGAGCTCCTTGCCCT   |
| ESR1 | ENSG00000088833 | 83  | 102 - | 0.00035 | TGGCAGGGCCACACTTCCTC  |
| ESR1 | ENSG00000153044 | 181 | 200 + | 0.00035 | GGGGCGGGGCCCTCGGGCCT  |
| ESR1 | ENSG00000138061 | 31  | 50 -  | 0.00035 | ACACAGGGTCAGCTTAGCTT  |
| ESR1 | ENSG00000077782 | 255 | 274 + | 0.00035 | AGCGCCGGACAGCTCGGCC   |
| ESR1 | ENSG00000177182 | 121 | 140 + | 0.00035 | AGACAAAGGCACAATTACCC  |
| ESR1 | ENSG00000248394 | 247 | 266 - | 0.00035 | GCGCGGGGTCGCCATACCCA  |
| ESR1 | ENSG00000156970 | 189 | 208 + | 0.00035 | GGGCGTGGCCACGTGACCG   |
| ESR1 | ENSG00000024048 | 129 | 148 + | 0.00035 | CTCCTGGGTGTTATTGCCCC  |
| ESR1 | ENSG00000254964 | 229 | 248 + | 0.00035 | AGCCTGGGCCACAATCCCAT  |
| ESR1 | ENSG00000241499 | 325 | 344 - | 0.00035 | CACCATAGTCACTCTGCTTC  |
| ESR1 | ENSG00000137821 | 87  | 106 - | 0.00035 | GTCCTCAGGCACCTTGCTC   |
| ESR1 | ENSG00000124222 | 255 | 274 - | 0.00035 | CAGCAGGGCCTGCCTCCCCG  |
| ESR1 | ENSG00000180398 | 354 | 373 + | 0.00035 | GCGCTCGGGTGCCTCGCCT   |
| ESR1 | ENSG00000159176 | 52  | 71 -  | 0.00036 | CGAGCTGGTCAGCAGCACCC  |
| ESR1 | ENSG00000225302 | 38  | 57 +  | 0.00036 | CTGCCTAGGGAGGCTGCCTC  |
| ESR1 | ENSG00000250073 | 269 | 288 - | 0.00036 | TGCCAGATCGCCGAACCC    |
| ESR1 | ENSG00000179902 | 63  | 82 +  | 0.00036 | TACCCACGTGCCTTGACAA   |
| ESR1 | ENSG00000080573 | 220 | 239 + | 0.00036 | CCGAGAAGTCGCCGCCCC    |
| ESR1 | ENSG00000138382 | 115 | 134 + | 0.00036 | GGGATGGGGCAATGAGGCC   |
| ESR1 | ENSG00000152672 | 138 | 157 - | 0.00036 | CTCCAGCTCTTCTCCCTC    |
| ESR1 | ENSG00000249055 | 147 | 166 + | 0.00036 | CTCCATGATTACCCTGGCTC  |
| ESR1 | ENSG00000041802 | 109 | 128 + | 0.00036 | CCTCCGAGTCTCCGCGTCT   |
| ESR1 | ENSG00000085274 | 144 | 163 + | 0.00036 | GCGCATGCCCACTGTGCCA   |
| ESR1 | ENSG00000233558 | 231 | 250 - | 0.00036 | ATGTCTGGGTCTTGCCAC    |
| ESR1 | ENSG00000224489 | 136 | 155 + | 0.00036 | GGAATGTGCCACCATGCCCG  |
| ESR1 | ENSG00000198894 | 162 | 181 - | 0.00036 | GGGCCAGCGCTCAGAGCCT   |

|      |                 |     |       |         |                      |
|------|-----------------|-----|-------|---------|----------------------|
| ESR1 | ENSG00000101230 | 12  | 31 -  | 0.00036 | GGGCCGGGGGAGCAGGAGCT |
| ESR1 | ENSG00000186615 | 111 | 130 - | 0.00036 | GTGCCGGGTCCGCCCCGCC  |
| ESR1 | ENSG00000229863 | 126 | 145 + | 0.00036 | GGTTCTGGCTAAACTGACTT |
| ESR1 | ENSG00000164404 | 367 | 386 + | 0.00036 | AACACTGCACAACCAGACCC |
| ESR1 | ENSG00000182004 | 49  | 68 -  | 0.00036 | GTGGAAGGTGGGCCGGTCTT |
| ESR1 | ENSG00000134398 | 159 | 178 - | 0.00036 | AATACAGATCCGCCTGATCT |
| ESR1 | ENSG00000232564 | 136 | 155 + | 0.00036 | CGATCCACCCACCTTGACCT |
| ESR1 | ENSG00000250487 | 288 | 307 + | 0.00036 | CTCCGAGGCCAGCTTCACAG |
| ESR1 | ENSG00000225374 | 224 | 243 + | 0.00036 | TTCCAGGGGCACACTCCC   |
| ESR1 | ENSG00000105694 | 342 | 361 + | 0.00037 | GGCCCAGGTCAGTCTGCTGA |
| ESR1 | ENSG00000000419 | 132 | 151 + | 0.00037 | CACACAGGTCATCCCCGCT  |
| ESR1 | ENSG00000168350 | 322 | 341 + | 0.00037 | GGGCAGGGGCGGCGGAGCC  |
| ESR1 | ENSG00000074416 | 243 | 262 + | 0.00037 | CGCGCAGCTCGTCCCGGCC  |
| ESR1 | ENSG00000247828 | 286 | 305 - | 0.00037 | TCTCAAGGTCAGCACCGCCC |
| ESR1 | ENSG00000255046 | 149 | 168 - | 0.00037 | GGCCCTGGCCAATCAGCGCC |
| ESR1 | ENSG00000049323 | 211 | 230 - | 0.00037 | GGGCCCGGCGAGGGTGGCCC |
| ESR1 | ENSG00000244580 | 245 | 264 - | 0.00037 | GGTTGAGATCATTTTGGCCC |
| ESR1 | ENSG00000223505 | 288 | 307 + | 0.00037 | ATTGAAGGTGTTTATGCCCC |
| ESR1 | ENSG00000153071 | 226 | 245 - | 0.00037 | AGTCAATCACATGCTGCCCT |
| ESR1 | ENSG00000230955 | 348 | 367 + | 0.00037 | AGACGGGTCTCCCTCTCTC  |
| ESR1 | ENSG00000244676 | 77  | 96 -  | 0.00037 | TTTATTGGTCTCCAGACAT  |
| ESR1 | ENSG00000186792 | 9   | 28 -  | 0.00037 | CCTCCAGCTGGCTCTGCCTC |
| ESR1 | ENSG00000086189 | 253 | 272 - | 0.00037 | CGCCCGCACCACTCTGGCCC |
| ESR1 | ENSG00000147439 | 304 | 323 - | 0.00037 | CGCCTGGGCCTCACTACCA  |
| ESR1 | ENSG00000242941 | 51  | 70 +  | 0.00037 | GTCCAGAGGCACCCAAGCCC |
| ESR1 | ENSG00000164855 | 253 | 272 - | 0.00037 | GGCCCCGGCCTCCTGGCCT  |
| ESR1 | ENSG00000185513 | 302 | 321 + | 0.00038 | TCCCCTGGGCGCCGCGCCAC |
| ESR1 | ENSG00000250604 | 114 | 133 - | 0.00038 | TACAGAGCTGAGGTTGACCC |
| ESR1 | ENSG00000207556 | 195 | 214 - | 0.00038 | CGCCAGGCCGCCATTATCT  |
| ESR1 | ENSG00000239783 | 122 | 141 - | 0.00038 | GGAGGAGGGTACCATGGCCA |
| ESR1 | ENSG00000107165 | 133 | 152 - | 0.00038 | ATTTTAGGGCTTCAAGACCC |
| ESR1 | ENSG00000207314 | 338 | 357 + | 0.00038 | GGACCAGGGCTGGAAGCCTT |
| ESR1 | ENSG00000197746 | 103 | 122 + | 0.00038 | CTCCAAGTTCTTCTCACTC  |
| ESR1 | ENSG00000166710 | 163 | 182 - | 0.00038 | GCCCCAGGGACCGTCACTT  |
| ESR1 | ENSG00000198211 | 186 | 205 + | 0.00038 | CACCCAAGGCCCCCTGGCAG |
| ESR1 | ENSG00000255730 | 130 | 149 + | 0.00038 | CTCCCCAGTCTCCCTCCCCA |
| ESR1 | ENSG00000251821 | 245 | 264 + | 0.00038 | GAACATGGCCCCTGTGACTC |
| ESR1 | ENSG00000153046 | 175 | 194 - | 0.00038 | AACAAAGGGGTCACTGAAC  |
| ESR1 | ENSG00000048828 | 340 | 359 + | 0.00038 | ACCCCCGGCCCCGCCGCC   |
| ESR1 | ENSG00000159899 | 10  | 29 +  | 0.00038 | GCGCAGCGCCCTCCTGCCCT |
| ESR1 | ENSG00000255276 | 379 | 398 - | 0.00038 | GGCCGGGCGGGGCTGACCC  |
| ESR1 | ENSG00000039523 | 135 | 154 - | 0.00038 | AGTGCTGGCCAACGTGCCAG |
| ESR1 | ENSG00000078018 | 17  | 36 -  | 0.00038 | CGGGAGGGGAGCACGACCG  |
| ESR1 | ENSG00000173163 | 60  | 79 +  | 0.00038 | CGGTAAGCCCTCACTGCCTT |
| ESR1 | ENSG00000156482 | 248 | 267 + | 0.00038 | TCACAAGTTCACGCTAACAC |
| ESR1 | ENSG00000172590 | 178 | 197 + | 0.00038 | GCGCGTGGCCACCGAGGCCA |
| ESR1 | ENSG00000230259 | 140 | 159 - | 0.00038 | CCGGCAGGCCGCTCGCCCC  |
| ESR1 | ENSG00000136521 | 369 | 388 + | 0.00038 | GTGGCAGCTCTGTCTGGCCG |
| ESR1 | ENSG00000103018 | 93  | 112 - | 0.00039 | AATTAGGGTCGTTAGCCCC  |
| ESR1 | ENSG00000181789 | 340 | 359 - | 0.00039 | CAGGCCTGGCCCCCTCACCT |

|      |                 |     |       |          |                      |
|------|-----------------|-----|-------|----------|----------------------|
| ESR1 | ENSG00000171189 | 279 | 298 + | 0.00039  | GCACCAACTCACCTGTACC  |
| ESR1 | ENSG00000131381 | 341 | 360 - | 0.00039  | CCCCAGACTGGGCCTGACCC |
| ESR1 | ENSG00000119509 | 89  | 108 + | 0.00039  | GCCCCGGTCCACTGAGTCCT |
| ESR1 | ENSG00000116750 | 114 | 133 + | 0.00039  | TGATAAATTCACCTGTCTT  |
| ESR1 | ENSG00000110492 | 260 | 279 + | 0.00039  | GAGCCCAGGTTCTGTGGCCC |
| ESR1 | ENSG00000254501 | 235 | 254 + | 0.00039  | GGGAAGGACCACCGAGACCA |
| ESR1 | ENSG00000221182 | 112 | 131 - | 0.00039  | ATCCAAAGACTCTGAATC   |
| ESR1 | ENSG00000255467 | 173 | 192 - | 0.00039  | TCCCCACAGCACTCAGACCC |
| ESR1 | ENSG00000122986 | 284 | 303 - | 0.00039  | GGCCTAGGGTCCACTGAGCT |
| ESR1 | ENSG00000256804 | 72  | 91 -  | 0.00039  | CAGCAAGAGCTGCTTGCCTC |
| ESR1 | ENSG00000234324 | 74  | 93 +  | 0.00039  | GGCCCAAGCGATCCTCCAC  |
| ESR1 | ENSG00000257727 | 347 | 366 - | 0.00039  | CGAACAGATCCACGTGACCA |
| ESR1 | ENSG00000258830 | 345 | 364 - | 0.00039  | TGCAAGAGACATCCTGATCC |
| ESR1 | ENSG00000136492 | 247 | 266 - | 0.00039  | GACTGGGGCCGCCGTTACCT |
| ESR1 | ENSG00000256326 | 114 | 133 + | 0.00039  | TGGTCAGGTGGCTCAGATCT |
| ESR1 | ENSG00000109971 | 167 | 186 - | 0.0004   | TGGTTAGGTGAACCAGGCAT |
| ESR1 | ENSG00000110075 | 374 | 393 + | 0.0004   | GGCGCGGGGCCCTCCACCT  |
| ESR1 | ENSG00000173457 | 133 | 152 - | 0.0004   | TCTACAGGCCCTCTCCCCT  |
| ESR1 | ENSG00000119616 | 314 | 333 - | 0.0004   | GGCCACGGTCTGACTACCTC |
| ESR1 | ENSG00000119682 | 40  | 59 +  | 0.0004   | GGCCACGGTCTGACTACCTC |
| ESR1 | ENSG00000129535 | 59  | 78 +  | 0.0004   | GCCTTAGGACTCAAAGACCC |
| ESR1 | ENSG00000113269 | 255 | 274 + | 0.0004   | CTCCCGTGCCGCCCTTCCCC |
| ESR1 | ENSG00000255421 | 154 | 173 - | 0.0004   | TAGCCGGGCATCGTGGCAC  |
| ESR1 | ENSG00000258212 | 159 | 178 - | 0.0004   | CCTGTGTGTGACTGACAC   |
| ESR1 | ENSG00000134864 | 210 | 229 - | 0.0004   | AGCTATGGAGAGAGTGACAC |
| ESR1 | ENSG00000138709 | 2   | 21 -  | 0.0004   | GGCTGAGGCCGCCCGACTG  |
| ESR1 | ENSG00000105640 | 336 | 355 - | 4.00E-04 | CCTGATGGGGGCCCGTCCCC |
| ESR1 | ENSG00000196085 | 16  | 35 +  | 4.00E-04 | ATCCTTGGGTACCTTGAAC  |
| ESR1 | ENSG00000113810 | 216 | 235 + | 4.00E-04 | CCTCTCGGCGAGCCCGCCCT |
| ESR1 | ENSG00000244041 | 68  | 87 +  | 4.00E-04 | GTGCCATTGCACTCTAGCCT |
| ESR1 | ENSG00000169314 | 335 | 354 + | 0.0004   | TGGCCCTGGGACCCAGCCAT |
| ESR1 | ENSG00000197958 | 223 | 242 - | 0.0004   | AGGAAGTTGCACCTTGGCCT |
| ESR1 | ENSG00000224281 | 361 | 380 + | 0.00041  | CGCCCTTGACGCCAGGCC   |
| ESR1 | ENSG00000115267 | 292 | 311 - | 0.00041  | GCGCCTGGGGTCCCGGACCG |
| ESR1 | ENSG00000220891 | 58  | 77 -  | 0.00041  | GCTCCGGGACACCCACCCG  |
| ESR1 | ENSG00000255909 | 59  | 78 +  | 0.00041  | GGTGTGGGGTCCCCTGGCCT |
| ESR1 | ENSG00000237813 | 110 | 129 + | 0.00041  | GGCGCAGGGAACCGTCCCCA |
| ESR1 | ENSG00000170144 | 186 | 205 + | 0.00041  | GGCAAAGGCCCTTCCCCT   |
| ESR1 | ENSG00000199509 | 206 | 225 + | 0.00041  | CGGCCATAACCACCTGAACA |
| ESR1 | ENSG00000054148 | 147 | 166 + | 0.00041  | CGCCCCGCGCCCCCTACCC  |
| ESR1 | ENSG00000115211 | 98  | 117 - | 0.00042  | TGCCCAGGCGATTGCGTCCC |
| ESR1 | ENSG00000155755 | 288 | 307 - | 0.00042  | CGCAGCGCCTCCGGGACCT  |
| ESR1 | ENSG00000114270 | 59  | 78 -  | 0.00042  | CTGAGAGGTCGCCGCCCCCC |
| ESR1 | ENSG00000149735 | 67  | 86 -  | 0.00042  | CACCTGGGGGATCTTGCTCT |
| ESR1 | ENSG00000199545 | 66  | 85 +  | 0.00042  | GAGCCAGGAGAGTGTGAAAT |
| ESR1 | ENSG00000076321 | 366 | 385 + | 0.00042  | GGGACAGCGGACAGCGCCCC |
| ESR1 | ENSG00000060339 | 246 | 265 - | 0.00042  | CCTAAGGGTTGCCTTGGCCT |
| ESR1 | ENSG00000229951 | 320 | 339 + | 0.00042  | CTCCAGGTACCCAGACCC   |
| ESR1 | ENSG00000184979 | 17  | 36 +  | 0.00042  | ACCTGAGACCAGCCTGGCCA |
| ESR1 | ENSG00000181163 | 167 | 186 - | 0.00042  | GGGTGGGCCGACTCTGACTT |

|      |                 |     |       |         |                       |
|------|-----------------|-----|-------|---------|-----------------------|
| ESR1 | ENSG00000253966 | 178 | 197 + | 0.00042 | CCCCCAGCTGACTATGCACC  |
| ESR1 | ENSG00000137642 | 22  | 41 +  | 0.00042 | CCACCGGCGCTCGCTGCCTT  |
| ESR1 | ENSG00000249042 | 121 | 140 + | 0.00042 | CCTCCAGCGGATGCTGCCAT  |
| ESR1 | ENSG00000237380 | 238 | 257 - | 0.00043 | AGCCTGGGGCGCCGACCCCC  |
| ESR1 | ENSG00000102882 | 299 | 318 + | 0.00043 | GACCCATGGCCCCCGAACCT  |
| ESR1 | ENSG00000109046 | 62  | 81 -  | 0.00043 | CAGGCTGGTTCCGCTGACTC  |
| ESR1 | ENSG00000093100 | 237 | 256 + | 0.00043 | GAGTCAGTCCAGGTTACCT   |
| ESR1 | ENSG00000241343 | 80  | 99 -  | 0.00043 | TCCTCTGGCCTCCCCGTCCC  |
| ESR1 | ENSG00000003056 | 127 | 146 + | 0.00043 | GCCCCGAGGGCGAGCTGCCTG |
| ESR1 | ENSG00000258653 | 77  | 96 -  | 0.00043 | AGGCCTCGGCCCTCTGACCG  |
| ESR1 | ENSG00000233579 | 346 | 365 - | 0.00043 | CACCCAGGACACCCCCGAAAG |
| ESR1 | ENSG00000077097 | 156 | 175 + | 0.00043 | GGGGGCGGCCGCCGCGCCCT  |
| ESR1 | ENSG00000187741 | 186 | 205 - | 0.00043 | GCCCCGAGCCCGCGCTGCCTT |
| ESR1 | ENSG00000119684 | 165 | 184 - | 0.00044 | ATCCAGGGTTTCAGTGAACC  |
| ESR1 | ENSG00000196141 | 324 | 343 - | 0.00044 | ACACATGGGCATCGTGGGCT  |
| ESR1 | ENSG00000186352 | 362 | 381 + | 0.00044 | CACTCGGGACAGCCATCCCC  |
| ESR1 | ENSG00000106336 | 179 | 198 - | 0.00044 | AGTGCAGTCTATTCTCTCCC  |
| ESR1 | ENSG00000157657 | 27  | 46 -  | 0.00044 | GCCCCCGCCGCCCTGCCCG   |
| ESR1 | ENSG00000159409 | 270 | 289 - | 0.00044 | CCGCTGGGGCTGCCTGCTTT  |
| ESR1 | ENSG00000247853 | 341 | 360 - | 0.00044 | CTGCCCTGCCTCCCTGTCCA  |
| ESR1 | ENSG00000154146 | 77  | 96 +  | 0.00044 | AAGCCAGGGGATTGCGCCCC  |
| ESR1 | ENSG00000234076 | 93  | 112 - | 0.00044 | GGGCGGGGCCACCACCTCCT  |
| ESR1 | ENSG00000133111 | 137 | 156 + | 0.00044 | GGCGCCGCGCTCCCTGACAG  |
| ESR1 | ENSG00000121067 | 227 | 246 - | 0.00044 | TCCCTGGGTTTCCCTGCTCC  |
| ESR1 | ENSG00000233547 | 209 | 228 + | 0.00044 | CAGAGAGGTCTCCCCAACAT  |
| ESR1 | ENSG00000258725 | 146 | 165 - | 0.00044 | TGGGGAGGTGTTCTGCTCT   |
| ESR1 | ENSG00000240766 | 252 | 271 - | 0.00044 | AGTCAAGTTCTACCAGTCCT  |
| ESR1 | ENSG00000111291 | 63  | 82 -  | 0.00044 | CCGGAAGGACAGAAAGACAC  |
| ESR1 | ENSG00000130717 | 257 | 276 - | 0.00044 | GCATCGGGTCCCCGCGCCCC  |
| ESR1 | ENSG00000253720 | 204 | 223 - | 0.00045 | GGTCCGCGGCCCCCTCACTT  |
| ESR1 | ENSG00000243916 | 236 | 255 - | 0.00045 | TCCCAGGGCCCCGAGTCCT   |
| ESR1 | ENSG00000255905 | 299 | 318 - | 0.00045 | CCTCCTAGGCAGCCTCCAC   |
| ESR1 | ENSG00000089159 | 155 | 174 - | 0.00045 | GTGCACGCGCGCCCCGCCCC  |
| ESR1 | ENSG00000247315 | 42  | 61 +  | 0.00045 | GGCGCTGGCCAATATGCGCC  |
| ESR1 | ENSG00000155508 | 135 | 154 - | 0.00045 | GCGGCGGGCCGCCCTCAGCC  |
| ESR1 | ENSG00000236997 | 112 | 131 + | 0.00045 | TACTGTTGTCAGAAATGGTCT |
| ESR1 | ENSG00000224985 | 77  | 96 +  | 0.00046 | GCGCCTGCGCATCCACACCC  |
| ESR1 | ENSG00000227694 | 343 | 362 + | 0.00046 | AGCCGAAGACTGCGACTC    |
| ESR1 | ENSG00000250900 | 8   | 27 -  | 0.00046 | CGTGCGGGTGGCCCTGGACC  |
| ESR1 | ENSG00000204390 | 351 | 370 - | 0.00046 | AAGGCGGGTCTCCGTGACGA  |
| ESR1 | ENSG00000058091 | 67  | 86 +  | 0.00046 | TCTCAGGCCAGCATGTCCC   |
| ESR1 | ENSG00000198431 | 309 | 328 - | 0.00046 | CCCTCGGTCTGACTGACCT   |
| ESR1 | ENSG00000235529 | 294 | 313 - | 0.00046 | ACAAAAGGTCTCCAGCCTG   |
| ESR1 | ENSG00000185112 | 378 | 397 + | 0.00046 | CGGCCAGGCCAGCCCGGACA  |
| ESR1 | ENSG00000138400 | 127 | 146 + | 0.00046 | CAGCCATGACAGCTTCCCCG  |
| ESR1 | ENSG00000236256 | 293 | 312 - | 0.00046 | CCCAAATGCCATCATGAACT  |
| ESR1 | ENSG00000115415 | 353 | 372 - | 0.00046 | TGAAAAGGTCTCTTTTACCC  |
| ESR1 | ENSG00000167588 | 138 | 157 - | 0.00046 | GCCCCAGCCAGCTTCCAC    |
| ESR1 | ENSG00000204438 | 101 | 120 + | 0.00046 | TTGTCAGGTCCCTTTCACCG  |
| ESR1 | ENSG00000035115 | 98  | 117 + | 0.00047 | ATGCAAGGATACACTTCCCC  |



|      |                 |     |       |         |                       |
|------|-----------------|-----|-------|---------|-----------------------|
| ESR1 | ENSG00000114942 | 181 | 200 + | 0.00047 | CGGGAAGGACAACCTTGGACC |
| ESR1 | ENSG00000249715 | 72  | 91 +  | 0.00047 | AGGCCAGTCACCTATACCC   |
| ESR1 | ENSG00000207437 | 349 | 368 + | 0.00047 | TCCTGATGACAGTCTGCCTC  |
| ESR1 | ENSG00000250963 | 357 | 376 + | 0.00047 | TGCAACTGACATCCTCACCT  |
| ESR1 | ENSG00000242095 | 119 | 138 + | 0.00047 | GCGCCCGCCAATCTTACTT   |
| ESR1 | ENSG00000096093 | 150 | 169 + | 0.00047 | ATGCCTGCGCCTCCTGGCCC  |
| ESR1 | ENSG00000101654 | 150 | 169 + | 0.00047 | GCGTCGCGGCACTCTCGCCT  |
| ESR1 | ENSG00000223522 | 346 | 365 + | 0.00047 | TGCCTGGTGCAGCCTGGTCT  |
| ESR1 | ENSG00000203466 | 337 | 356 - | 0.00047 | ATTCAAGACCAGCCTGATCA  |
| ESR1 | ENSG00000212496 | 355 | 374 - | 0.00047 | GCGTGAGCCACCGTGCCTG   |
| ESR1 | ENSG00000137210 | 56  | 75 +  | 0.00047 | GGCGCTAGCCGCGATGCCCC  |
| ESR1 | ENSG00000065150 | 122 | 141 + | 0.00048 | TAGCAGGAGCCAGCTGACCT  |
| ESR1 | ENSG00000148737 | 20  | 39 +  | 0.00048 | CCCCCGGCTTCCCCGCCCC   |
| ESR1 | ENSG00000244336 | 345 | 364 - | 0.00048 | AGCCCGGAGATCCTGCATC   |
| ESR1 | ENSG00000138297 | 230 | 249 - | 0.00049 | CCTACTTCACACGCTGACCT  |
| ESR1 | ENSG00000172954 | 328 | 347 + | 0.00049 | GGCGTCGCGCGCGTGCCTT   |
| ESR1 | ENSG00000178685 | 143 | 162 + | 0.00049 | GGCACTCCCTCCATGACCT   |
| ESR1 | ENSG00000224884 | 345 | 364 - | 0.00049 | GAGCCACTGCACCCAGCCAT  |
| ESR1 | ENSG00000131508 | 214 | 233 + | 0.00049 | GACTCCGGCCAGCCTGAGTG  |
| ESR1 | ENSG00000164466 | 309 | 328 + | 0.00049 | ACCATACGCCACCATGCCCA  |
| ESR1 | ENSG00000116455 | 21  | 40 +  | 0.0005  | CACCCGGGACAGCATGGTCA  |
| ESR1 | ENSG00000236439 | 201 | 220 + | 0.0005  | CGCACATGAGAACATGCCTC  |
| ESR1 | ENSG00000136044 | 95  | 114 + | 0.0005  | CGGGACTGGCACCCAGAGCC  |
| ESR1 | ENSG00000072310 | 1   | 20 +  | 0.0005  | CGGCCAGAGGCCGCTGCCAT  |
| ESR1 | ENSG00000010404 | 2   | 21 -  | 0.0005  | CGCTGCAGGCACCCTATCCC  |
| ESR1 | ENSG00000230371 | 54  | 73 -  | 0.0005  | CGGCCTGGTGGCATTGCTCT  |
| ESR1 | ENSG00000112739 | 352 | 371 - | 0.0005  | CGCGGCGGCCATCTTGAAC   |
| ESR1 | ENSG00000255471 | 83  | 102 + | 0.0005  | GAAACTGGGCAGCCAGCCAG  |
| ESR1 | ENSG00000065970 | 92  | 111 - | 0.0005  | GAGCCGGGAGACGCCGAGCC  |
| ESR1 | ENSG00000071082 | 377 | 396 - | 0.0005  | TCCCAGGGTCACTAAGACGC  |
| ESR1 | ENSG00000213592 | 242 | 261 + | 0.0005  | GCCCCTGGGCCGCATCTCCT  |
| ESR1 | ENSG00000255729 | 319 | 338 - | 0.00051 | GCCGCTTGGCAGAGTGATCC  |
| ESR1 | ENSG00000255782 | 371 | 390 - | 0.00051 | TTTCAGGGAGATTCTCACCT  |
| ESR1 | ENSG00000061455 | 127 | 146 + | 0.00051 | TCTTCTGGCCTGCCTCCCCT  |
| ESR1 | ENSG00000059378 | 252 | 271 - | 0.00051 | AGCAAAGGACCCTCTCACAC  |
| ESR1 | ENSG00000166181 | 10  | 29 +  | 0.00051 | TTCCCCGCCACCCACACCC   |
| ESR1 | ENSG00000185567 | 282 | 301 + | 0.00051 | CGCGACGGGCCGCCAGGCC   |
| ESR1 | ENSG00000233927 | 291 | 310 - | 0.00051 | GCTCCGTGTGTCCGGGACCC  |
| ESR1 | ENSG00000249825 | 349 | 368 + | 0.00051 | TGCCAAGGTGAGCATGGAAC  |
| ESR1 | ENSG00000142856 | 114 | 133 - | 0.00051 | GGCCCGCGGCCCTCCCTC    |
| ESR1 | ENSG00000052841 | 270 | 289 + | 0.00051 | GCTCCGGCCCAGGCTGGCTC  |
| ESR1 | ENSG00000136108 | 370 | 389 - | 0.00051 | CGGACTGCGCCCTCTGACTC  |
| ESR1 | ENSG00000244462 | 58  | 77 +  | 0.00051 | CCGCCAGGGCCACTAGCCCA  |
| ESR1 | ENSG00000114544 | 29  | 48 +  | 0.00051 | CAGCCAGGCCGCTCACACTC  |
| ESR1 | ENSG00000205268 | 214 | 233 - | 0.00051 | CCGCCGTGACTCCCTTCCCT  |
| ESR1 | ENSG00000258588 | 288 | 307 - | 0.00052 | AATCCAAGGCACCTTAAACT  |
| ESR1 | ENSG00000227051 | 282 | 301 + | 0.00052 | CTCGCTGCTCAGCCGATCC   |
| ESR1 | ENSG00000170889 | 3   | 22 -  | 0.00052 | ATTTCCGGCTCACTGAGGCC  |
| ESR1 | ENSG00000149716 | 89  | 108 + | 0.00052 | CAGCGCGGACAGACAGGCC   |
| ESR1 | ENSG00000177981 | 356 | 375 - | 0.00052 | GAGCCACCGCACCCAGCCAC  |

|      |                 |     |       |         |                      |
|------|-----------------|-----|-------|---------|----------------------|
| ESR1 | ENSG00000257894 | 46  | 65 +  | 0.00052 | AAAGATGGTGACCCACCCCT |
| ESR1 | ENSG00000166046 | 84  | 103 + | 0.00052 | GCCAGACGGCACAGAGCCCT |
| ESR1 | ENSG00000113593 | 317 | 336 - | 0.00052 | CCTCCGGGTCCC GCGCCTT |
| ESR1 | ENSG00000139289 | 264 | 283 + | 0.00052 | AAATATGGCCATTTTGACAT |
| ESR1 | ENSG00000184117 | 330 | 349 - | 0.00052 | CGGTCAGGTGGGCGTTTCCT |
| ESR1 | ENSG00000182944 | 44  | 63 +  | 0.00052 | CACACCCGGCCGCGTGACCC |
| ESR1 | ENSG00000259118 | 340 | 359 + | 0.00053 | CCTCCAGGACACTCATACTT |
| ESR1 | ENSG00000124444 | 284 | 303 - | 0.00053 | CCCCGTGGTTTCCGCGCCCT |
| ESR1 | ENSG00000226763 | 59  | 78 -  | 0.00053 | CCCCGTGGTTTCCGCGCCCT |
| ESR1 | ENSG00000168484 | 65  | 84 -  | 0.00053 | CACCCGGCGCGGTCAGCCCC |
| ESR1 | ENSG00000224660 | 138 | 157 - | 0.00053 | AGCCCAGGAGTTCGAGACCA |
| ESR1 | ENSG00000242257 | 140 | 159 + | 0.00053 | ATGGAATCTCACTCTGTAC  |
| ESR1 | ENSG00000142541 | 307 | 326 - | 0.00053 | GCCCCTTGCCGCCCGGCC   |
| ESR1 | ENSG00000224623 | 174 | 193 - | 0.00053 | GTTTGAGACCAGCCTGGCCA |
| ESR1 | ENSG00000207185 | 377 | 396 + | 0.00053 | ATCTCAGCTCACTGCACCCT |
| ESR1 | ENSG00000123349 | 380 | 399 - | 0.00053 | CCGGGAGGCCTCGCTGCGCC |
| ESR1 | ENSG00000254452 | 86  | 105 - | 0.00054 | TGGCTTGGTTTCTGTGTCCT |
| ESR1 | ENSG00000245750 | 299 | 318 - | 0.00054 | GGATCTGGTGCTCGAGACCT |
| ESR1 | ENSG00000114391 | 15  | 34 +  | 0.00054 | AGACAGAGACAGAATGACTC |
| ESR1 | ENSG00000242683 | 244 | 263 + | 0.00054 | GGGCGTGGTGGCTCTCGCCT |
| ESR1 | ENSG00000164543 | 42  | 61 -  | 0.00054 | GGGTGATGAGATCCTGATCT |
| ESR1 | ENSG00000258232 | 159 | 178 - | 0.00054 | TTAAATGTGCGAGCTGACTT |
| ESR1 | ENSG00000073910 | 249 | 268 + | 0.00054 | GGCCGAGGCTGCCTGCACC  |
| ESR1 | ENSG00000178878 | 212 | 231 - | 0.00054 | CGCCCCGCGCACCCCCGCT  |
| ESR1 | ENSG00000229127 | 203 | 222 - | 0.00054 | AACCTAGGAGACAATGGCCA |
| ESR1 | ENSG00000174748 | 179 | 198 + | 0.00054 | ATCCCTGGGCGCTGGGGCCT |
| ESR1 | ENSG00000139624 | 324 | 343 + | 0.00054 | GCCCTGGGGCCGCCTCCCCG |
| ESR1 | ENSG00000255692 | 299 | 318 - | 0.00054 | CTGAAATGCCGTCGTGGCCC |
| ESR1 | ENSG00000232739 | 227 | 246 + | 0.00055 | GGACCAGTGCTACCCGCGCT |
| ESR1 | ENSG00000237827 | 134 | 153 - | 0.00055 | CACTCAGATTACTCTCACTT |
| ESR1 | ENSG00000010361 | 64  | 83 -  | 0.00055 | TTCCAAGTTGAGGACGACCT |
| ESR1 | ENSG00000093009 | 163 | 182 - | 0.00055 | TCGTAAGGACAATGGGCCCT |
| ESR1 | ENSG00000224424 | 188 | 207 - | 0.00055 | CCGCCGGGCTCACGGAGCT  |
| ESR1 | ENSG00000233885 | 174 | 193 + | 0.00055 | ATCCACTGACAGCCTCACTC |
| ESR1 | ENSG00000087470 | 221 | 240 - | 0.00055 | GCCCCCGGCTACCTGCCCC  |
| ESR1 | ENSG00000174527 | 263 | 282 + | 0.00055 | AATCCAAGGTAATGTGACTT |
| ESR1 | ENSG00000100442 | 109 | 128 - | 0.00055 | GGACCAGACCACGTTCACTT |
| ESR1 | ENSG00000196542 | 299 | 318 + | 0.00055 | CGCCACTCTCAGCAAGCCCT |
| ESR1 | ENSG00000133027 | 1   | 20 +  | 0.00056 | ATCCAAGGGGATACTGCTAC |
| ESR1 | ENSG00000148634 | 97  | 116 + | 0.00056 | GCCTGTGGCCAGCCACCCCC |
| ESR1 | ENSG00000167100 | 291 | 310 + | 0.00056 | CCGTCAGGTCTCCTGGTCCA |
| ESR1 | ENSG00000256885 | 198 | 217 + | 0.00056 | CTCCTGGGCTACAGTGATCC |
| ESR1 | ENSG00000111249 | 241 | 260 - | 0.00056 | GCCGCCGGCCGCCCGGGCCC |
| ESR1 | ENSG00000183273 | 85  | 104 + | 0.00056 | GTTACGACCCCCATGACCC  |
| ESR1 | ENSG00000089775 | 42  | 61 +  | 0.00056 | AGCCTCGGGCTCCGGGACAC |
| ESR1 | ENSG00000198189 | 16  | 35 -  | 0.00056 | CTCGCCTGTGATCCTGGCAC |
| ESR1 | ENSG00000249494 | 300 | 319 - | 0.00056 | GTTAGATGACGCCCTAACCT |
| ESR1 | ENSG00000104549 | 8   | 27 +  | 0.00056 | CGCGCAGGTTGCGCCGCTC  |
| ESR1 | ENSG00000201207 | 62  | 81 -  | 0.00056 | ATTTCACTCACTGCAACCT  |
| ESR1 | ENSG00000257918 | 193 | 212 - | 0.00057 | TCCCCTGAGTACTGTCCT   |

|      |                 |     |       |          |                      |
|------|-----------------|-----|-------|----------|----------------------|
| ESR1 | ENSG00000254909 | 150 | 169 - | 0.00057  | TTGCTCTGTCACCCAGACTG |
| ESR1 | ENSG00000226769 | 295 | 314 + | 0.00057  | TCCTCCATTGACCTTGACCT |
| ESR1 | ENSG00000001631 | 52  | 71 +  | 0.00057  | CGGGAAGCGCTGCGTGAGCC |
| ESR1 | ENSG00000257755 | 6   | 25 -  | 0.00057  | TGCCCAGGCCTGATTCACAC |
| ESR1 | ENSG00000256029 | 133 | 152 - | 0.00058  | CTGTAAGCGCCCTGTGGCCT |
| ESR1 | ENSG00000174579 | 340 | 359 - | 0.00058  | GTCAGAGGGCTCTAAGGCC  |
| ESR1 | ENSG00000159082 | 125 | 144 - | 0.00058  | GACCACGCCACTCTGCGCC  |
| ESR1 | ENSG00000162458 | 230 | 249 - | 0.00058  | AGCTCGGGTGTGATGTCAC  |
| ESR1 | ENSG00000204856 | 2   | 21 +  | 0.00058  | GCCCCGCGGGCCCATGACCA |
| ESR1 | ENSG00000232021 | 213 | 232 + | 0.00058  | GGCAGCGGCCCGCTCACCT  |
| ESR1 | ENSG00000197375 | 75  | 94 +  | 0.00058  | TCGCCAGGTCCCCAGGACAG |
| ESR1 | ENSG00000102401 | 335 | 354 + | 0.00059  | GCCCCAGGGGAAGATGCCGT |
| ESR1 | ENSG00000256329 | 194 | 213 + | 0.00059  | AGCCAGGGACCTTTGGCCT  |
| ESR1 | ENSG00000110108 | 204 | 223 + | 0.00059  | GCTCTAGAACTACATGACCC |
| ESR1 | ENSG00000115419 | 45  | 64 +  | 0.00059  | CTCTCCGCGCACCCAGAGCC |
| ESR1 | ENSG00000236810 | 155 | 174 - | 0.00059  | ACGTCAGTTCCGCTCGACCC |
| ESR1 | ENSG00000240695 | 103 | 122 + | 0.00059  | GTTGGAGACCAGCCTGGCCA |
| ESR1 | ENSG00000230005 | 2   | 21 +  | 0.0006   | CAGCAAAGCCACCCTGCTTG |
| ESR1 | ENSG00000167552 | 27  | 46 -  | 0.0006   | GGAAAATGACTGCCAGCCCC |
| ESR1 | ENSG00000252412 | 88  | 107 - | 0.0006   | TGCCAGGGTCACTGGGTGCT |
| ESR1 | ENSG00000257076 | 26  | 45 -  | 0.0006   | GTGGCCAGGCACAGTGGCTC |
| ESR1 | ENSG00000143256 | 90  | 109 - | 0.0006   | GGCCGCGGTGAATCCACCT  |
| ESR1 | ENSG00000176973 | 273 | 292 - | 0.0006   | GAGAAAAGGCAACGGGACAT |
| ESR1 | ENSG00000232633 | 309 | 328 - | 0.0006   | AAGGCTGGAGAATCTGCCTC |
| ESR1 | ENSG00000214753 | 165 | 184 + | 6.00E-04 | TGTTTTGGGCTCCGTGAGCC |
| ESR1 | ENSG00000224356 | 132 | 151 + | 6.00E-04 | TTGTTCTGTCAGCCTCACTT |
| ESR1 | ENSG00000239688 | 251 | 270 + | 6.00E-04 | GTAAGAGGACCGCCTGAGCC |
| ESR1 | ENSG00000245521 | 201 | 220 + | 0.0006   | AGCCAGGACGCTAGGCCTT  |
| ESR1 | ENSG00000241762 | 283 | 302 + | 0.0006   | ACGTCATTTTCATCTTACCC |
| ESR1 | ENSG00000053747 | 358 | 377 - | 0.00061  | CGCCTGCGCCTCCCGACCT  |
| ESR1 | ENSG00000220378 | 12  | 31 -  | 0.00061  | ATCTCGGCTCACTGCAACCT |
| ESR1 | ENSG00000168092 | 201 | 220 - | 0.00061  | ACTTCCGGTTCCTGCCAC   |
| ESR1 | ENSG00000139719 | 193 | 212 - | 0.00061  | ACGGCAGCGCACGCCAACCC |
| ESR1 | ENSG00000256861 | 95  | 114 - | 0.00061  | ACGGCAGCGCACGCCAACCC |
| ESR1 | ENSG00000257337 | 93  | 112 + | 0.00061  | GCCCCCTGGCGCCTCGCCT  |
| ESR1 | ENSG00000121749 | 379 | 398 - | 0.00061  | GTCCCTCGTGTCCCTCCCC  |
| ESR1 | ENSG00000226963 | 371 | 390 - | 0.00061  | CTCACGGTGCACCCCGTCTC |
| ESR1 | ENSG00000249310 | 38  | 57 +  | 0.00061  | CTGTGATCTCGCCTGCCTC  |
| ESR1 | ENSG00000013810 | 83  | 102 - | 0.00061  | GGCTCCGCCCTCCCTCCCC  |
| ESR1 | ENSG00000234141 | 107 | 126 + | 0.00061  | GCGTAAGCTCAGTGTGATTC |
| ESR1 | ENSG00000254088 | 194 | 213 + | 0.00061  | ACAGAAGGTCACCCAGCTC  |
| ESR1 | ENSG00000215217 | 37  | 56 +  | 0.00062  | ACACGTGGCCACCGAGAGCT |
| ESR1 | ENSG00000242180 | 369 | 388 + | 0.00062  | TGGCAATGGCACCTCCTTC  |
| ESR1 | ENSG00000242219 | 114 | 133 - | 0.00062  | GGCTCATGCGATCCTCCCAT |
| ESR1 | ENSG00000250068 | 210 | 229 + | 0.00063  | GTGGATGGCGAGTAAGACCT |
| ESR1 | ENSG00000180815 | 105 | 124 + | 0.00063  | GTGCCGGGACCGCCTGCGCG |
| ESR1 | ENSG00000135473 | 79  | 98 +  | 0.00063  | CCACCGGCGCCCCGTAACCT |
| ESR1 | ENSG00000250656 | 287 | 306 + | 0.00063  | CGCCATGGTGGCCACCACCT |
| ESR1 | ENSG00000225839 | 261 | 280 + | 0.00063  | GAGGCCAGGCACAGTGGCTC |
| ESR1 | ENSG00000234233 | 292 | 311 - | 0.00064  | TTCGAAGGTGAGCCTTAACT |

|      |                 |     |       |         |                      |
|------|-----------------|-----|-------|---------|----------------------|
| ESR1 | ENSG00000173113 | 48  | 67 +  | 0.00064 | CGCACACGCCAGCTAGTCCC |
| ESR1 | ENSG00000128645 | 227 | 246 - | 0.00064 | CGGCCACGTGGCGCTGGCCG |
| ESR1 | ENSG00000159884 | 155 | 174 - | 0.00064 | CGGGGAGGCCACGCCCACTC |
| ESR1 | ENSG00000256349 | 376 | 395 + | 0.00064 | AAGATGTGTGGCCTTGCCCC |
| ESR1 | ENSG00000094880 | 271 | 290 + | 0.00064 | GCGGCAGTGGCGCCTGTCTT |
| ESR1 | ENSG00000133872 | 191 | 210 + | 0.00064 | GGCCCCGCCACACCGCCTC  |
| ESR1 | ENSG00000140416 | 56  | 75 -  | 0.00065 | GCGGCCGAGAGGCCGCCCT  |
| ESR1 | ENSG00000110446 | 20  | 39 +  | 0.00065 | AGGCTTGTTGAAAGTGCCCC |
| ESR1 | ENSG00000089737 | 182 | 201 + | 0.00065 | GGGGCGGGACTTCTCCCCA  |
| ESR1 | ENSG00000223916 | 173 | 192 - | 0.00065 | CTCCGCGCTCACCGCCACCC |
| ESR1 | ENSG00000214188 | 11  | 30 +  | 0.00065 | GGCCCGGGCGCCACCCCT   |
| ESR1 | ENSG00000166839 | 294 | 313 + | 0.00065 | GGCCGAGGCCGAGAGGACCC |
| ESR1 | ENSG00000174374 | 285 | 304 - | 0.00066 | CGACAGGCTCACTGCAACCT |
| ESR1 | ENSG00000186298 | 287 | 306 - | 0.00066 | CCCCCTGCCACCCCGCTCC  |
| ESR1 | ENSG00000090006 | 380 | 399 + | 0.00066 | GATCCTGGACTATCCGCCCT |
| ESR1 | ENSG00000152580 | 105 | 124 + | 0.00066 | AAAGAAGGTCTCCAGATTC  |
| ESR1 | ENSG00000120306 | 137 | 156 + | 0.00066 | AGGACAGAAGATTCTGTCCC |
| ESR1 | ENSG00000250234 | 359 | 378 - | 0.00066 | GACCCCTCTGGGCCTGCCCC |
| ESR1 | ENSG00000183495 | 369 | 388 - | 0.00066 | CCGGCCGGCGAGCGGGCCCT |
| ESR1 | ENSG00000175416 | 27  | 46 +  | 0.00066 | AGCCCAGGTGTCCTCGACGC |
| ESR1 | ENSG00000218186 | 338 | 357 - | 0.00066 | TGCCCAGGCCACCTTGGAAG |
| ESR1 | ENSG00000197620 | 103 | 122 + | 0.00066 | GCCCCGCTCTCCAGCCCC   |
| ESR1 | ENSG00000100099 | 40  | 59 +  | 0.00066 | CCCCCGGGCGCCGCCTCCC  |
| ESR1 | ENSG00000162623 | 62  | 81 -  | 0.00067 | GGAGAAGGTGTGGCAGTCTT |
| ESR1 | ENSG00000229117 | 96  | 115 + | 0.00067 | GAACTAACTCAACCTACCCT |
| ESR1 | ENSG00000227528 | 160 | 179 - | 0.00067 | GGAGGAAGTCAGCATGAGTC |
| ESR1 | ENSG00000238862 | 2   | 21 -  | 0.00067 | GCGGCCAGGCACGGTGGCTC |
| ESR1 | ENSG00000119608 | 40  | 59 -  | 0.00067 | ATGCCAGGGCTCATGAACCT |
| ESR1 | ENSG00000182177 | 115 | 134 - | 0.00067 | TGCGGAGGGCCACCTGCCAG |
| ESR1 | ENSG00000125991 | 379 | 398 - | 0.00067 | CCTCCACGCGACCCCGGCC  |
| ESR1 | ENSG00000114302 | 259 | 278 - | 0.00067 | TACCACGGCCGACCTGGCAC |
| ESR1 | ENSG00000235105 | 238 | 257 + | 0.00067 | AAGATGAATCACTCAGACCT |
| ESR1 | ENSG00000118263 | 167 | 186 - | 0.00067 | GCCAATTGTTTGCTTGACCT |
| ESR1 | ENSG00000232073 | 86  | 105 - | 0.00067 | TCTCAAGGACACTCAAGCCT |
| ESR1 | ENSG00000254208 | 317 | 336 - | 0.00067 | GGTAACGGGCGCTTTGCCCG |
| ESR1 | ENSG00000225951 | 361 | 380 + | 0.00068 | GGCTTGCTCACAATGCCCT  |
| ESR1 | ENSG00000248168 | 74  | 93 +  | 0.00068 | AGGGCAGCTGACAGCGGCC  |
| ESR1 | ENSG00000171121 | 376 | 395 - | 0.00068 | CAGCGGGAGCCCCAGCCCC  |
| ESR1 | ENSG00000189337 | 169 | 188 - | 0.00068 | CAAGAAGGACACCGCGCGCC |
| ESR1 | ENSG00000241853 | 231 | 250 + | 0.00068 | AAGAAGGGCTATTCTGCCAT |
| ESR1 | ENSG00000250641 | 28  | 47 +  | 0.00068 | AGTGGTGGTCACTTATCCC  |
| ESR1 | ENSG00000254633 | 122 | 141 - | 0.00068 | TGCAGGACTCTGCCTGCCCC |
| ESR1 | ENSG00000162889 | 316 | 335 + | 0.00068 | CCCACGGAGCCCCGCGACCC |
| ESR1 | ENSG00000234264 | 295 | 314 - | 0.00068 | AACCCTTGCCAGACTCACCG |
| ESR1 | ENSG00000249007 | 39  | 58 +  | 0.00068 | CACCCTGGCCTCTGTTCCCC |
| ESR1 | ENSG00000254400 | 361 | 380 - | 0.00068 | AATCCAGGGGACTCGGCGCC |
| ESR1 | ENSG00000228604 | 119 | 138 + | 0.00068 | AAATCAGATCATCTTCACTT |
| ESR1 | ENSG00000163900 | 99  | 118 - | 0.00068 | GACTCCGCCCTCTGTCTCT  |
| ESR1 | ENSG00000149380 | 154 | 173 - | 0.00069 | CGCCCTGTCTCCGCCCCCT  |
| ESR1 | ENSG00000226677 | 364 | 383 + | 0.00069 | ATGTTATCGCAGCTTGACTT |

|      |                 |     |       |         |                       |
|------|-----------------|-----|-------|---------|-----------------------|
| ESR1 | ENSG00000254140 | 100 | 119 + | 0.00069 | TTTCCCAGGCAACGGGACCC  |
| ESR1 | ENSG00000258395 | 320 | 339 - | 0.00069 | GTACAAAGACACGCGGACTC  |
| ESR1 | ENSG00000160712 | 195 | 214 - | 0.00069 | AACAGGGGACCGCCAGCCCC  |
| ESR1 | ENSG00000078140 | 378 | 397 - | 0.00069 | TCCCTCGGCGATTGACACCT  |
| ESR1 | ENSG00000141219 | 29  | 48 +  | 0.00069 | GGAAAGGGGGTCCCTTCCCT  |
| ESR1 | ENSG00000138433 | 15  | 34 -  | 0.00069 | GGCGCGGCACTGCTTGACCG  |
| ESR1 | ENSG00000227617 | 132 | 151 - | 0.00069 | GAGCCACCACACCCGGCCCC  |
| ESR1 | ENSG00000171604 | 223 | 242 + | 0.00069 | GAGGAAGGTCGGCCTTGAC   |
| ESR1 | ENSG00000105793 | 248 | 267 + | 0.00069 | CTTTGGGTTTCATACTGCCTT |
| ESR1 | ENSG00000230424 | 252 | 271 - | 0.0007  | CCCCAGACTCACCTTACCC   |
| ESR1 | ENSG00000236404 | 307 | 326 - | 0.0007  | GTGCCAGGCTACTGAGTCAC  |
| ESR1 | ENSG00000155744 | 353 | 372 - | 0.0007  | TTTCCAGACCACCTCGCCA   |
| ESR1 | ENSG00000127080 | 368 | 387 + | 0.0007  | CTGACAGGCGCTCCTCCCC   |
| ESR1 | ENSG00000171401 | 303 | 322 + | 0.00071 | GGCCCAGGCAAGCAAGCTT   |
| ESR1 | ENSG00000258974 | 271 | 290 - | 0.00071 | GTCCATGGCCACGTTGCTCA  |
| ESR1 | ENSG00000140525 | 289 | 308 - | 0.00071 | CTCTGCAGTCACCTCGGCCT  |
| ESR1 | ENSG00000135631 | 128 | 147 - | 0.00071 | AACCGAGGGCGCCCTCTGCT  |
| ESR1 | ENSG00000224189 | 285 | 304 - | 0.00071 | CGACGTGCTCAGCTTGCCAC  |
| ESR1 | ENSG00000187747 | 380 | 399 + | 0.00071 | AGGCAATGGCATCCTAATTT  |
| ESR1 | ENSG00000162643 | 316 | 335 - | 0.00072 | ACCTCAGGTCCTACTGAATC  |
| ESR1 | ENSG00000163661 | 234 | 253 + | 0.00072 | TATTAAGGACTCTCTGCTCC  |
| ESR1 | ENSG00000257529 | 12  | 31 -  | 0.00072 | TGGTCCACTCACCCGACTT   |
| ESR1 | ENSG00000177119 | 121 | 140 + | 0.00072 | TGCTCAGGGAACCCAGTCCA  |
| ESR1 | ENSG00000204264 | 279 | 298 - | 0.00072 | CACCCACAAGAGCGTGCCTT  |
| ESR1 | ENSG00000232371 | 22  | 41 +  | 0.00072 | GGCGTGAGCCACCATGCCTG  |
| ESR1 | ENSG00000135317 | 160 | 179 - | 0.00073 | CCTGAGGGGCAACCGGAGCT  |
| ESR1 | ENSG00000133316 | 375 | 394 + | 0.00073 | GGAACGGTGCCTCTCCCTT   |
| ESR1 | ENSG00000254876 | 16  | 35 -  | 0.00073 | GGACCCGCGCTCCAGTCCC   |
| ESR1 | ENSG00000103550 | 227 | 246 - | 0.00073 | AGCCAGCTCCGCCGTGACCC  |
| ESR1 | ENSG00000167085 | 233 | 252 - | 0.00074 | ACCTGCTTCCACTCTGACCT  |
| ESR1 | ENSG00000198496 | 308 | 327 + | 0.00074 | AGAAGAGGTCCCAATCCCC   |
| ESR1 | ENSG00000142669 | 204 | 223 - | 0.00074 | CTCAGATGTCCCCCTGGTCC  |
| ESR1 | ENSG00000167553 | 147 | 166 - | 0.00074 | GGCCGCGGGCAGCCCGTCTG  |
| ESR1 | ENSG00000250317 | 347 | 366 + | 0.00074 | TGCAAATTGCAAAGTACAT   |
| ESR1 | ENSG00000182575 | 201 | 220 + | 0.00075 | CGCGCAGGTCCCCAGCACAT  |
| ESR1 | ENSG00000242247 | 64  | 83 -  | 0.00075 | GCAGAAGGTGCCTCTGTAC   |
| ESR1 | ENSG00000204310 | 31  | 50 -  | 0.00075 | TTGGCATTGCACATTGACTT  |
| ESR1 | ENSG00000254673 | 246 | 265 + | 0.00075 | GGCCACGTGCAGCCGGCCAC  |
| ESR1 | ENSG00000133193 | 156 | 175 - | 0.00075 | TGTTAGCCAGCGTCACAC    |
| ESR1 | ENSG00000238567 | 124 | 143 + | 0.00075 | GTTCCAGGCTGCAGTGAGCT  |
| ESR1 | ENSG00000100154 | 87  | 106 + | 0.00075 | GGCGGGGGTGGGCGAGACAC  |
| ESR1 | ENSG00000235897 | 102 | 121 + | 0.00075 | TCTCCAGGGCAACAGGGCCG  |
| ESR1 | ENSG00000164180 | 55  | 74 +  | 0.00075 | CATACAGGTGTCCAGGACCG  |
| ESR1 | ENSG00000198804 | 319 | 338 + | 0.00075 | GAGCTGGGCCAGCCAGGCAA  |
| ESR1 | ENSG00000143164 | 234 | 253 - | 0.00075 | GCCGCCGGTGCCCCGAGGCCT |
| ESR1 | ENSG00000247708 | 305 | 324 + | 0.00075 | CGGAGAGCTCAGCGAGCTCT  |
| ESR1 | ENSG00000226059 | 153 | 172 - | 0.00075 | AGCGCAGGGCACAATGCATG  |
| ESR1 | ENSG00000235848 | 303 | 322 - | 0.00076 | CGCCAAAGTTTCAATGCCAT  |
| ESR1 | ENSG00000224502 | 250 | 269 + | 0.00076 | GTCCGAGGTCACACAGCGTG  |
| ESR1 | ENSG00000202314 | 241 | 260 - | 0.00076 | GGCCATTTTCATTGAGCCCC  |

|      |                 |     |       |         |                       |
|------|-----------------|-----|-------|---------|-----------------------|
| ESR1 | ENSG00000229759 | 350 | 369 + | 0.00076 | AGGCCGTATCACAGCGACTC  |
| ESR1 | ENSG00000112182 | 106 | 125 + | 0.00076 | CGCCGGGCGTACCGCGCCCC  |
| ESR1 | ENSG00000185684 | 279 | 298 - | 0.00077 | AGCCAAGGGCTCCCGGCGCG  |
| ESR1 | ENSG00000105877 | 313 | 332 - | 0.00077 | TCCACAGCGCCCACTGCCTC  |
| ESR1 | ENSG00000152778 | 50  | 69 -  | 0.00077 | GCAGCTGGGCTCCTTCACTT  |
| ESR1 | ENSG00000242251 | 267 | 286 + | 0.00077 | GGCCAGGAGTTCCAGACTA   |
| ESR1 | ENSG00000213741 | 310 | 329 - | 0.00077 | CAGACAGTTCTAAGTGCCTT  |
| ESR1 | ENSG00000214283 | 243 | 262 + | 0.00077 | CAGTTTGGCGACTCTGACAG  |
| ESR1 | ENSG00000224020 | 146 | 165 - | 0.00077 | TGCTCAGCTCGCATTGAACT  |
| ESR1 | ENSG00000226784 | 380 | 399 + | 0.00078 | GAAGAGAGTGATCCGGACCC  |
| ESR1 | ENSG00000223998 | 127 | 146 - | 0.00078 | GTTCCGAGACCAGGCTGGCCA |
| ESR1 | ENSG00000079337 | 4   | 23 -  | 0.00078 | AGTTAAGCACACCCTGTCTA  |
| ESR1 | ENSG00000197728 | 49  | 68 -  | 0.00078 | CCCCCTTCCCCCTGCCCC    |
| ESR1 | ENSG00000145741 | 4   | 23 +  | 0.00078 | AGGACCGCGCTCTCCGACCC  |
| ESR1 | ENSG00000234084 | 298 | 317 - | 0.00078 | CAAAAAGTCTCCTTGCTCT   |
| ESR1 | ENSG00000055609 | 75  | 94 +  | 0.00078 | ACCCCGGGGGCCGGCGCCCC  |
| ESR1 | ENSG00000111237 | 372 | 391 - | 0.00079 | GGGCCCTGACGCCGAGGCCT  |
| ESR1 | ENSG0000010256  | 59  | 78 +  | 0.00079 | GTTTGATATCAGCCTGGCCA  |
| ESR1 | ENSG00000219790 | 171 | 190 - | 0.00079 | AGCAAGGGCCATTCTCAGCC  |
| ESR1 | ENSG00000257534 | 194 | 213 + | 0.00079 | CAGACAGGGCTCTCCCTCT   |
| ESR1 | ENSG00000138768 | 362 | 381 + | 0.00079 | AGGGCGGGGAAGTTGTCTT   |
| ESR1 | ENSG00000169239 | 44  | 63 -  | 0.00079 | AACCAGTCCACGCTCTCCC   |
| ESR1 | ENSG00000171302 | 339 | 358 + | 0.0008  | AGCCAAGCCCAGCCAAGCCC  |
| ESR1 | ENSG00000183684 | 70  | 89 +  | 0.0008  | TCCCCGCTCACCCGTCCT    |
| ESR1 | ENSG00000257355 | 362 | 381 - | 0.0008  | CCGCATGCTCACCATTTCT   |
| ESR1 | ENSG00000152056 | 222 | 241 - | 0.0008  | CTGCCGCGGAGTGTGTCT    |
| ESR1 | ENSG00000240596 | 190 | 209 - | 0.0008  | CCTCCAGCCCTTTCTGCCAT  |
| ESR1 | ENSG00000215695 | 330 | 349 + | 0.00081 | GACTCAGATCGCATTGAACC  |
| ESR1 | ENSG0000012822  | 249 | 268 - | 0.00081 | AGCAAAGGACTTCAAGGCC   |
| ESR1 | ENSG00000113068 | 38  | 57 -  | 0.00081 | CGGTCAGGTCTGGCTTGCTC  |
| ESR1 | ENSG00000225251 | 178 | 197 + | 0.00081 | GATGCAGGTCTCTGTTCCAC  |
| ESR1 | ENSG00000207601 | 74  | 93 +  | 0.00081 | ATCGCAGGACTACAAGTCCC  |
| ESR1 | ENSG00000207110 | 36  | 55 +  | 0.00081 | CTTCAAGGATCCCCTGTCAT  |
| ESR1 | ENSG00000178796 | 17  | 36 +  | 0.00081 | TCTAGAGGTGTGTCTGCCTC  |
| ESR1 | ENSG00000243364 | 265 | 284 - | 0.00081 | GGTCCGTTTGGTCTGGCCT   |
| ESR1 | ENSG00000173451 | 123 | 142 + | 0.00081 | TACTCTGTCTCACAGACCT   |
| ESR1 | ENSG00000239607 | 208 | 227 - | 0.00082 | GGCATGCGCCACCACGCCCC  |
| ESR1 | ENSG00000121578 | 306 | 325 - | 0.00082 | GAGGCTGGTCCGCCCGGCTC  |
| ESR1 | ENSG00000127837 | 117 | 136 - | 0.00082 | GCCCCACCTGACTCCGCCCC  |
| ESR1 | ENSG00000127838 | 131 | 150 + | 0.00082 | GCCCCACCTGACTCCGCCCC  |
| ESR1 | ENSG00000183531 | 267 | 286 + | 0.00082 | CCCCTAGGTGAGCTAAACAC  |
| ESR1 | ENSG00000175455 | 357 | 376 + | 0.00082 | CTGGCGGGTCTCTGTCCTCC  |
| ESR1 | ENSG00000129484 | 197 | 216 + | 0.00083 | CCGCCTAGTGACACTGGGCC  |
| ESR1 | ENSG00000215424 | 58  | 77 -  | 0.00083 | AGCCCCGCCCTCATGCCCC   |
| ESR1 | ENSG00000108094 | 160 | 179 + | 0.00083 | GAAGCTTGGCTCCCTGCGCT  |
| ESR1 | ENSG00000219545 | 89  | 108 - | 0.00083 | TTCCGACTCATCCAGCCCC   |
| ESR1 | ENSG00000244307 | 68  | 87 -  | 0.00083 | GCAGCTTGTCTGCTTGCTT   |
| ESR1 | ENSG00000124302 | 315 | 334 - | 0.00083 | GGCGGGGGCGGCTTCCCTC   |
| ESR1 | ENSG00000128590 | 241 | 260 - | 0.00083 | GAGGAGGGCCGCCCTGCATC  |
| ESR1 | ENSG00000238300 | 281 | 300 + | 0.00083 | CAGCTAGGACTGAGTGTCTC  |

|      |                 |     |       |          |                       |
|------|-----------------|-----|-------|----------|-----------------------|
| ESR1 | ENSG00000243156 | 147 | 166 + | 0.00084  | GCGCCCGCTCGCGTTGCCAC  |
| ESR1 | ENSG00000134982 | 175 | 194 - | 0.00084  | GTGAGAGGTGTTGCTGGCTT  |
| ESR1 | ENSG00000073614 | 268 | 287 - | 0.00084  | GACGCCTGTGTGTCTGGCCT  |
| ESR1 | ENSG00000087111 | 83  | 102 - | 0.00084  | CTCTTAGGGTGCCCTCTCCT  |
| ESR1 | ENSG00000172543 | 332 | 351 + | 0.00084  | AGGTAAGTGCTCCCAAACCC  |
| ESR1 | ENSG00000196357 | 237 | 256 + | 0.00084  | AGACACGCGCACGCAGACAC  |
| ESR1 | ENSG00000168386 | 285 | 304 - | 0.00084  | GCTGCAGGATGAGGTGACCC  |
| ESR1 | ENSG00000232398 | 239 | 258 - | 0.00084  | GTGGAAGGCTAGCTTGCCAG  |
| ESR1 | ENSG00000106682 | 68  | 87 -  | 0.00085  | CTGCCCGCCTACGCGGCC    |
| ESR1 | ENSG00000248772 | 311 | 330 + | 0.00085  | CCCCAAACCCAGACTGATCT  |
| ESR1 | ENSG00000253256 | 47  | 66 -  | 0.00086  | GGCGCCTGTCACAGTGCGCG  |
| ESR1 | ENSG00000230534 | 85  | 104 + | 0.00086  | GGAGACGGCGAGCCCGACCC  |
| ESR1 | ENSG00000072210 | 303 | 322 - | 0.00086  | TTCCCTGGAGAGCTAGTCCC  |
| ESR1 | ENSG00000120738 | 59  | 78 +  | 0.00086  | ACTCCGGGTCCTCCCGGCCG  |
| ESR1 | ENSG00000162244 | 83  | 102 - | 0.00087  | CGCCCCCTTCAGGCTGCCTC  |
| ESR1 | ENSG00000215472 | 25  | 44 -  | 0.00087  | CACCAAGGGCTTGCTTCCC   |
| ESR1 | ENSG00000249755 | 224 | 243 - | 0.00087  | AAGACAGGACATACTTCCAT  |
| ESR1 | ENSG00000111837 | 42  | 61 +  | 0.00087  | AGCTCAGCCGACAGTCCCC   |
| ESR1 | ENSG00000119711 | 361 | 380 + | 0.00088  | GTGCCAAGGCACCATGAAGC  |
| ESR1 | ENSG00000147316 | 340 | 359 - | 0.00088  | CGACGAGGGGTGCCGGTCTT  |
| ESR1 | ENSG00000172534 | 115 | 134 + | 0.00089  | CGGTGACGTCACCCGGCTCC  |
| ESR1 | ENSG00000251357 | 358 | 377 + | 0.00089  | CTGCAGTTCAAACCTGAGCA  |
| ESR1 | ENSG00000140323 | 33  | 52 -  | 0.0009   | CCGCCAGGCCAGAGAGCCCG  |
| ESR1 | ENSG00000228093 | 111 | 130 + | 0.0009   | CCACCTGCTGATGCTGCCAT  |
| ESR1 | ENSG00000258813 | 284 | 303 - | 9.00E-04 | GAATTTTGCCATCCTGCCTC  |
| ESR1 | ENSG00000234913 | 357 | 376 - | 9.00E-04 | GGCGTGAGCCACCGCGCCCG  |
| ESR1 | ENSG00000109475 | 166 | 185 + | 9.00E-04 | TGCGCAATTCTATTTGACCT  |
| ESR1 | ENSG00000222750 | 139 | 158 + | 0.00091  | GATGGAGGAGGTTCTGCCCC  |
| ESR1 | ENSG00000219433 | 142 | 161 - | 0.00091  | GGCCAAGGCAAGCAACACCT  |
| ESR1 | ENSG00000231792 | 3   | 22 -  | 0.00091  | GGCCTGAGCCGCAAGTCCCCG |
| ESR1 | ENSG00000176532 | 358 | 377 - | 0.00092  | GAGAGATGGGACCCTGGCTG  |
| ESR1 | ENSG00000155962 | 280 | 299 + | 0.00092  | GCTCCAGGTCTGACTCAGTC  |
| ESR1 | ENSG00000224437 | 234 | 253 - | 0.00092  | GAACAAGGCCACCCGCACTG  |
| ESR1 | ENSG00000227973 | 281 | 300 - | 0.00092  | CACCTTTGGGACCTTGAGCC  |
| ESR1 | ENSG00000115204 | 191 | 210 + | 0.00093  | CTGCAGACTCACAGTGACTA  |
| ESR1 | ENSG00000105397 | 18  | 37 +  | 0.00093  | GGATCCGGCCGCGTTGCCCA  |
| ESR1 | ENSG00000240758 | 121 | 140 - | 0.00093  | GAGCAACGCCGCCAGCCTC   |
| ESR1 | ENSG00000213865 | 103 | 122 - | 0.00093  | AAATGTGGTCTCTCAGACTC  |
| ESR1 | ENSG00000214014 | 65  | 84 +  | 0.00094  | CTCTCATTTCCCCCAGACTT  |
| ESR1 | ENSG00000139974 | 207 | 226 - | 0.00095  | GGAGCGAGTCGACTTGATCT  |
| ESR1 | ENSG00000164621 | 162 | 181 + | 0.00095  | TGAGAAGGTTAATCTAATT   |
| ESR1 | ENSG00000113621 | 206 | 225 - | 0.00095  | ACATCTGGCAACCTAACCC   |
| ESR1 | ENSG00000172209 | 225 | 244 + | 0.00095  | GCGACAAGGTAGGCTGTGAT  |
| ESR1 | ENSG00000127423 | 83  | 102 + | 0.00096  | AGCGAAGGGGGCCAGGGCCT  |
| ESR1 | ENSG00000163468 | 230 | 249 - | 0.00096  | CTTCCAGATCACCTTCATAC  |
| ESR1 | ENSG00000111644 | 197 | 216 + | 0.00096  | GCCCCGCTGCGCCCCGCCCC  |
| ESR1 | ENSG00000187514 | 275 | 294 + | 0.00097  | GCGCAAGCTCTGCTGGACTT  |
| ESR1 | ENSG00000253174 | 36  | 55 -  | 0.00097  | AAGACAGCTCTTCTGAGAC   |
| ESR1 | ENSG00000130222 | 297 | 316 + | 0.00097  | GGTTGATCGCACTATGACTC  |
| ESR1 | ENSG00000168769 | 363 | 382 + | 0.00097  | GAGCGCGGGCAACGGGATCT  |

|      |                 |     |       |         |                      |
|------|-----------------|-----|-------|---------|----------------------|
| ESR1 | ENSG0000005007  | 278 | 297 - | 0.00098 | CGCCGCTGCCGCCGAGCCCC |
| ESR1 | ENSG00000236830 | 49  | 68 -  | 0.00098 | AGCCCAGCCCGTCGAGGCC  |
| ESR1 | ENSG00000233830 | 359 | 378 - | 0.00098 | CATCTATGTCGCCCCGAACC |
| ESR1 | ENSG00000172375 | 219 | 238 - | 0.00098 | GGGCCCTTTAAGCTTGACCT |
| ESR1 | ENSG00000177721 | 372 | 391 + | 0.00098 | GGCCCAGGCCGGTCTCAGCA |
| ESR1 | ENSG00000253518 | 42  | 61 +  | 0.00098 | TGCCAATACCACATTGCCTT |
| ESR1 | ENSG00000257446 | 203 | 222 + | 0.00099 | GCGCTCGGGGGTTCTGTCCT |
| ESR1 | ENSG00000164924 | 41  | 60 +  | 0.00099 | TTTGCAGGTCATCCAAGCAC |
| ESR1 | ENSG00000171863 | 196 | 215 + | 0.001   | TTCCTGGGACTCTCTAGCCT |
