# Supplementary material for: Prosaposin activates the androgen receptor and potentiates resistance to endocrine treatment in breast cancer
Source: Springer Nature journal article supplement (doi:10.1186/s13058-015-0636-6), 2015-09-04

# Supplemental Figure 3

## MCF7 cells – AR nuclear translocation

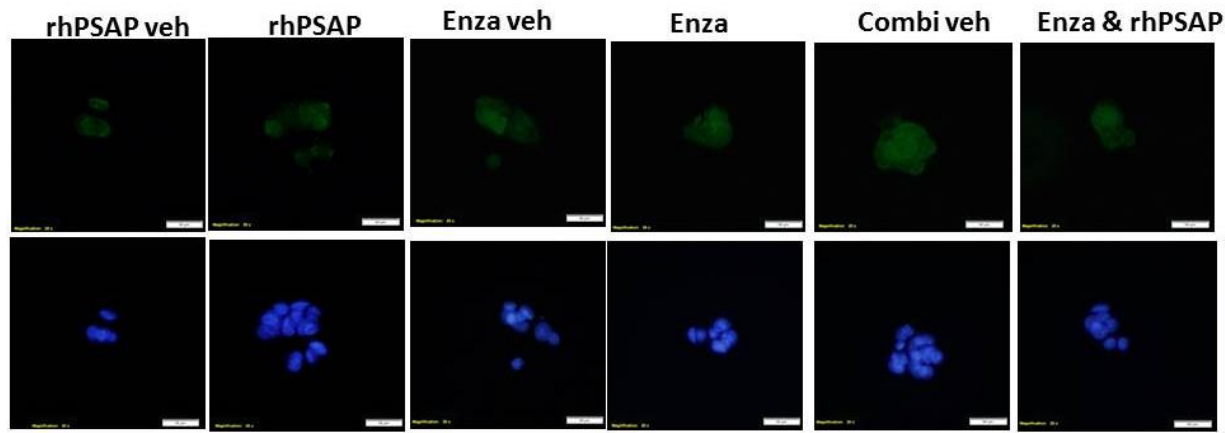

Supplement: MOESM7 [file 9781562]
