# Supplementary material for: Prosaposin activates the androgen receptor and potentiates resistance to endocrine treatment in breast cancer
Source: Springer Nature journal article supplement (doi:10.1186/s13058-015-0636-6), 2015-09-04
Supplement: MOESM8 [file 9781562]

# Supplemental Figure 4

**A**

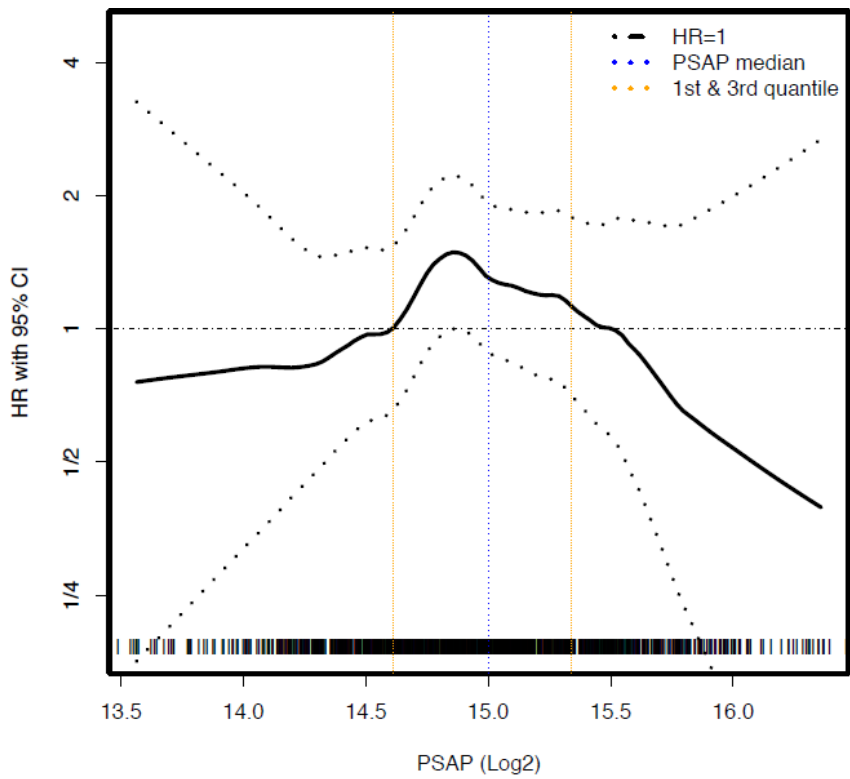

**B**

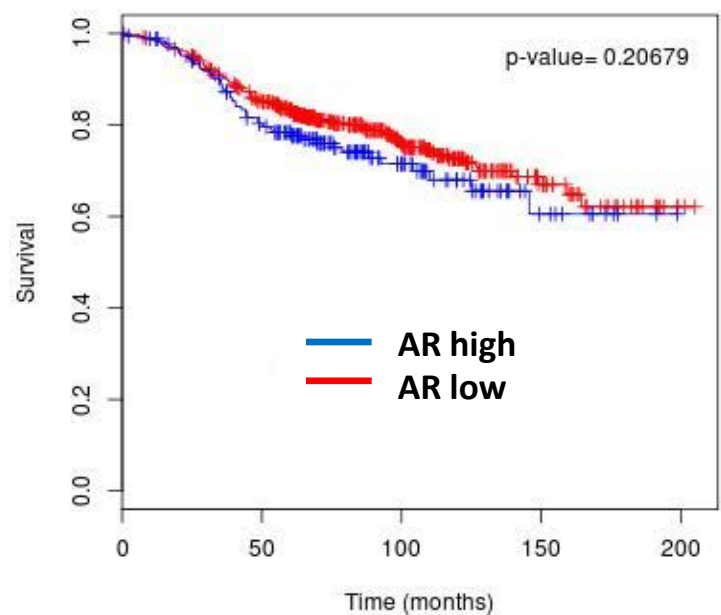

n= 661, number of events= 158  
Hazard ratio = 1.247 (0.8845 - 1.758)  
Score (logrank) test = 1.59 on 1 df, p=0.2069
